# Supplementary material for: A Genomic Survey of Angiotensin-Converting Enzymes Provides Novel Insights into Their Molecular Evolution in Vertebrates
Source: MDPI journal article supplement (doi:10.3390/molecules23112923), 2018-11-09

conservation

ace`Alligator`mississipp.Block2  
ace`Alligator`mississipp.Block4  
ace`Danio`rerio.Block2  
ace`Danio`rerio.Block4  
ace`Homo`sapiens.Block2  
ace`Homo`sapiens.Block4  
ace`Lepisosteus`oculatus.Block2  
ace`Lepisosteus`oculatus.Block4  
ace`Mus`musculus.Block2  
ace`Mus`musculus.Block4  
ace`Pseudopodoces`humili.Block2  
ace`Pseudopodoces`humili.Block4  
ace`Scleropages`formosus.Block2  
ace`Scleropages`formosus.Block4  
ace2`Alligator`mississipp.Block5  
ace2`Danio`rerio.Block5  
ace2`Homo`sapiens.Block5  
ace2`Lepisosteus`oculatus.Block5  
ace2`Mus`musculus.Block5  
ace2`Pseudopodoces`humili.Block5  
ace2`Scleropages`formosus.Block5

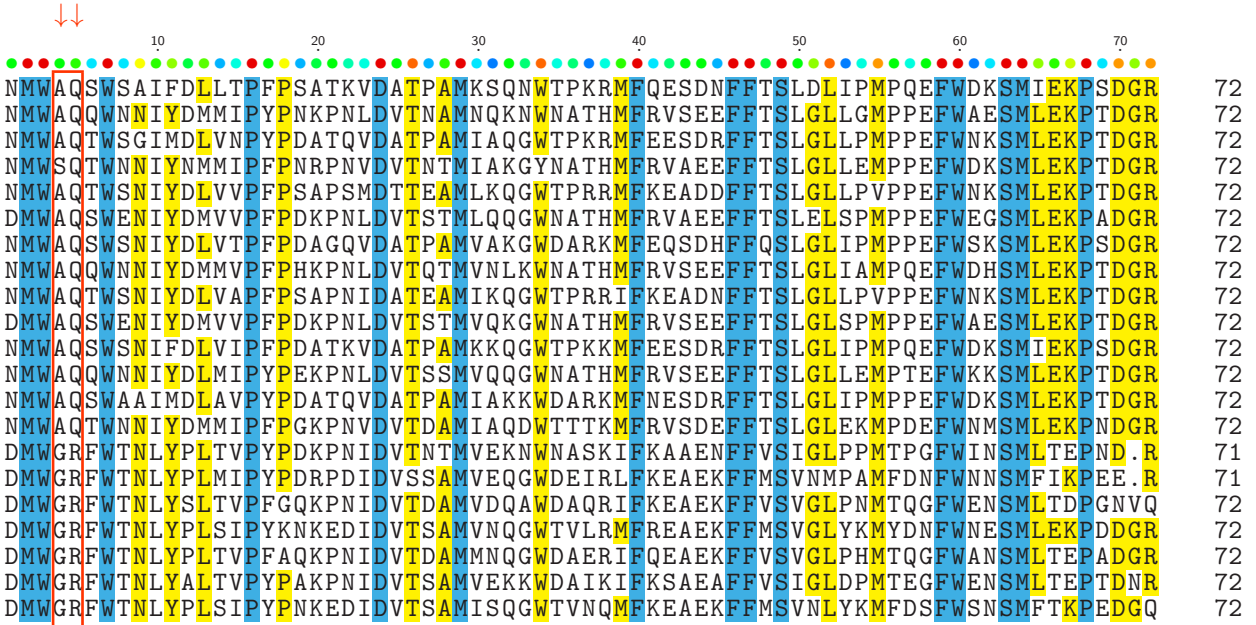

conservation

ace`Alligator`mississipp.Block2  
ace`Alligator`mississipp.Block4  
ace`Danio`rerio.Block2  
ace`Danio`rerio.Block4  
ace`Homo`sapiens.Block2  
ace`Homo`sapiens.Block4  
ace`Lepisosteus`oculatus.Block2  
ace`Lepisosteus`oculatus.Block4  
ace`Mus`musculus.Block2  
ace`Mus`musculus.Block4  
ace`Pseudopodoces`humili.Block2  
ace`Pseudopodoces`humili.Block4  
ace`Scleropages`formosus.Block2  
ace`Scleropages`formosus.Block4  
ace2`Alligator`mississipp.Block5  
ace2`Danio`rerio.Block5  
ace2`Homo`sapiens.Block5  
ace2`Lepisosteus`oculatus.Block5  
ace2`Mus`musculus.Block5  
ace2`Pseudopodoces`humili.Block5  
ace2`Scleropages`formosus.Block5

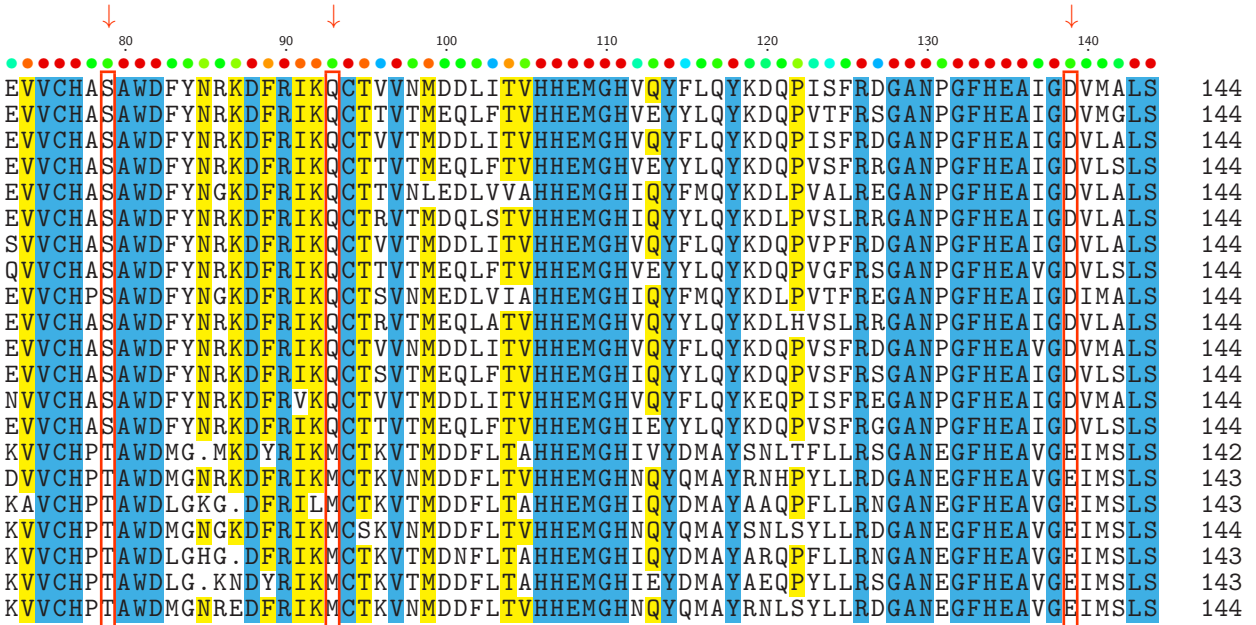

conservation

ace`Alligator`mississipp.Block2  
ace`Alligator`mississipp.Block4  
ace`Danio`rerio.Block2  
ace`Danio`rerio.Block4  
ace`Homo`sapiens.Block2  
ace`Homo`sapiens.Block4  
ace`Lepisosteus`oculatus.Block2  
ace`Lepisosteus`oculatus.Block4  
ace`Mus`musculus.Block2  
ace`Mus`musculus.Block4  
ace`Pseudopodoces`humili.Block2  
ace`Pseudopodoces`humili.Block4  
ace`Scleropages`formosus.Block2  
ace`Scleropages`formosus.Block4  
ace2`Alligator`mississipp.Block5  
ace2`Danio`rerio.Block5  
ace2`Homo`sapiens.Block5  
ace2`Lepisosteus`oculatus.Block5  
ace2`Mus`musculus.Block5  
ace2`Pseudopodoces`humili.Block5  
ace2`Scleropages`formosus.Block5

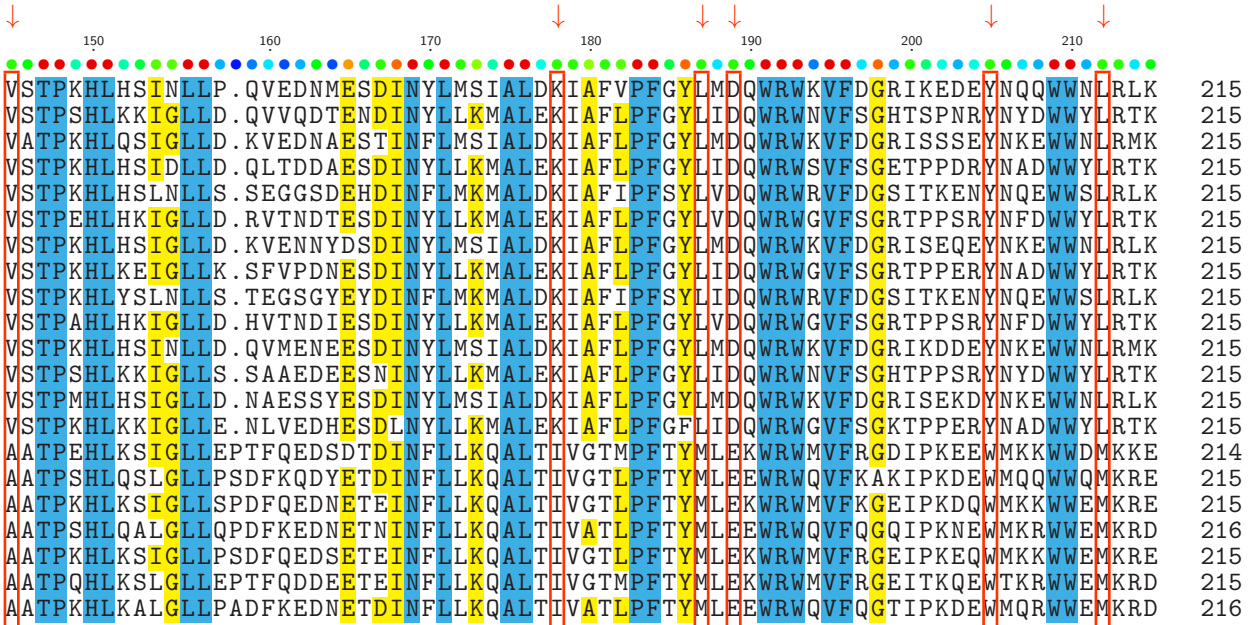

conservation

ace`Alligator`mississipp.Block2  
ace`Alligator`mississipp.Block4  
ace`Danio`rerio.Block2  
ace`Danio`rerio.Block4  
ace`Homo`sapiens.Block2  
ace`Homo`sapiens.Block4  
ace`Lepisosteus`oculatus.Block2  
ace`Lepisosteus`oculatus.Block4  
ace`Mus`musculus.Block2  
ace`Mus`musculus.Block4  
ace`Pseudopodoces`humili.Block2  
ace`Pseudopodoces`humili.Block4  
ace`Scleropages`formosus.Block2  
ace`Scleropages`formosus.Block4  
ace2`Alligator`mississipp.Block5  
ace2`Danio`rerio.Block5  
ace2`Homo`sapiens.Block5  
ace2`Lepisosteus`oculatus.Block5  
ace2`Mus`musculus.Block5  
ace2`Pseudopodoces`humili.Block5  
ace2`Scleropages`formosus.Block5

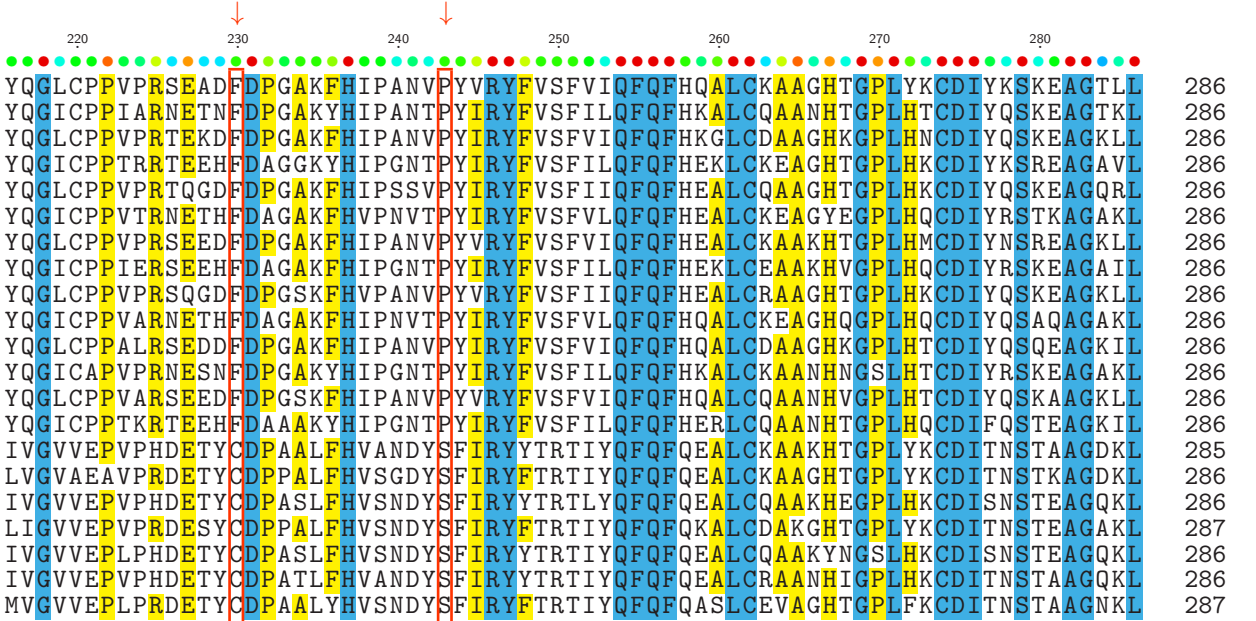

Supplement: s1 [file s1]
