# Supplementary material for: A Genomic Survey of Angiotensin-Converting Enzymes Provides Novel Insights into Their Molecular Evolution in Vertebrates
Source: MDPI journal article supplement (doi:10.3390/molecules23112923), 2018-11-09
Supplement: s1 [file s1]

ATG . . . . . TTCCTCCAG . . . . .  
 ATG . . . . . TTGGGCTACAT  
 ATG . . . . . GCATCTCTTAGCTCAAGTGAAGTTTGCTGTTCCAGCT  
 ATG . . . . . TCAGT  
 ATG . . . . . AACCACGCTCT  
 ATG . . . . . TCTGCAC  
 ATG . . . . . TGTGC  
 ATG . . . . . TCTATGAAG.  
 ATG . . . . . CCTGCCGG  
 ATG . . . . . CGGAGGCATCT  
 ATG . . . . . TCTCCGAG  
 ATG . . . . . TCAGGAAA  
 ATG . . . . . TCTGT  
 ATG . . . . . TCTGTGAG  
 ATG . . . . . TCTGTTAG  
 ATG CGCGTGACTCTGGACAAAAAACAATAATCGTGGCGACAATGCGACTTCTACTTCTCAAATACTGGTGGGGCTAGGCC  
 ATG . . . . . TCTGT  
 ATG . . . . . TCAGGCTCTTC  
 ATG . . . . . AATATGTTGGTCCACCT  
 ATG . . . . . TCCAGCTCCTC  
 ATG . . . . . TCTCCGAG  
 ATG . . . . . TCTATGACCAG  
 ATG . . . . . TCTCCGAG  
 ATG . . . . . TCCGCCGG  
 ATG . . . . . TCCGCCGG  
 ATG . . . . . TTGGTCCACTT  
 ATG . . . . . TCTCCGAG  
 ATG . . . . . TCTGG  
 ATG . . . . . TTACCCCTGGCT  
 ATG . . . . . TCAAGCTCCTG  
 ATG . . . . . CATTG  
 ATG . . . . . CTTGC  
 ATG . . . . . CCGGGTCTGCT  
 ATG . . . . . TCAGGCTCTTT  
 ATG . . . . . TCAGGCTCTTT  
 ATG . . . . . TCAAGCTCTTC

... TGGCTTTTGTGCTGCTGAGCCTGGCAGCAGCTGCTCTTTCTCTGTACACT...  
TTGGGTTTTTGTGGT... CTGTTTGCAGTTGCTGTGCCACAG...  
CTATCTTATTTTGAAC... TTGGTTCTTCTGGCTGTAGCACAG...  
TCGCTTTCTCCTGGTTTTGGCCTTGGCCTCCGGGGCCTGGGCTCAGACG...  
AGCTCTTACTCTCCTGCTGGGCCTCTGCTGCTCGGCCTGGGGCCAGACTGAG...  
GATTCTGTTAGCGTTGCTGGCTCTGTCTCTGCTGCGTCTCTGCTCAA...  
TCGCTGGCTCCTGCTTTGGCCCTTGGCCTCTGTGGCCTGCTGTAGACT...  
TTTCTTCTCGTGGGATGGACCGTTGTGGTCTGTGTGGTGGGACAGTCGGAA...  
GACTCTCGTAAGGCTTCTGGCCGTGTTCTCGGCTGTTTCCCTGGTGGCTGCGGTG...  
CTGCTTCTTTTGAAT... TTGGCTCTTCTGGCTGCAGCCAG...  
GATTCTTGTAACGCTCCTGGCCGTGTCTGTGCTGTTTCTGCTCAGTCAGAC...  
GATTTTCTTTTGGCGCTGGCTTTCTGTTTTTCTCTTTCTTCTCAGTCGCTA...  
TCGTGCGCTTTGGTTTTTGTACGGCTTCTGCGGCCTGGGCTCAGACA...  
GATTCTTTTATTGTTGCTGGCAGTGTCTCTGCTGTTTCTGCTCAGTCAAGC...  
GATTCTTGTAACATTGCTGGTTGTGTCTGTGCTGTCTTTGCCAGTCTGAC...  
TGCTTTCAGATATTGCTGGAATATAACCCGGCGTCCCTGGGTGGTGTGACAACCCCTTGATGAATTCTTTGTCTTAAGTG...  
CCATCTTCTGTAGTGTTGATTGTGGCAGTTGCTGCTGCTGCCAGTTAACT...  
CTGGCTCCTTCTCAG... CTGTTGCTGTAACTGCTGCTCAG...  
CTGGCTTCTCTGGT... CTGATCACTGCTGTGACCCCTCAA...  
CTGGCTCCTTCTCAGC... CTGTTGCTGTTACTACTGCTCAG...  
GATTCTTGTAACGCTCCTGGCCGTGTCTGTGCTGTTTCTGCTCAGTCAGAC...  
GCTTCTTCTAGTGGGGCTGATTGCTGTGGCCTGTGTGGCAGCACAGTCAGAC...  
GATTCTTGTAACGCTTCTGGCTGTGTCTGTGCTGTTTCTGCTCAGTCAGAC...  
GATTCTTGTAAGTGCTTGTGGCCGTGTCTTCGGCTGTTTCCCTCGTGACGGCC...  
GATTCTTGTAAGTGCTTCTGGCCGTGTCTTCGGCTGTTTCCCTCGTGACGGCC...  
CTGGCTTCTCTGTGGC... CTGAGTGCTGTTGTGGCCCTCAG...  
GATCCTTGTAACGCTCCTGGCCGTGTCTGTGCTGTTTCTGCTCAGTCAGAC...  
ACGCTTCTCTTGATTTTGGCCTTGGCCTCCACAGCCTGGGCTCAGACA...  
CTGCCTTATTTGGAGC... CTGGTGGTTCTGGCTGTGGCCAG...  
CTGGCTCCTTCTCAGC... CTGTTGCTGTTGCTACTGCTCAG...  
TAAGCTTCTTGCACTTCTAGCTTGGGCCTTTGTGGCCTCCGTGCTTAGTCAGTCC...  
TCGCTGGCTCCTGCTTTTGGCCATGGCCTCTGTGGACTGCTCTCAGACC...  
TTGGCTTTTGTATTGGGCTACTCCTTGCCACTGGCAGGAGCAA...  
CTGGCTCCTTCTCAGC... CTGTTGCTGTAAACGGCTGCTCAA...  
CTGGCTCCTTCTCAGC... CTGTTGCTGTAAACGGCTGCTCAA...  
CTGGCTCCTTCTCAGC... CTGTTGCTGTAACTGCTGCTCAG...

|              |       |       |       |       |       |       |       |       |       |       |       |       |       |       |       |       |       |       |       |       |       |       |       |       |       |       |       |       |       |       |       |       |       |       |       |       |       |       |       |       |       |       |       |       |       |       |       |       |       |       |       |       |       |       |       |       |       |       |       |       |       |       |       |       |       |       |       |       |       |       |       |       |       |       |       |       |       |       |       |       |       |       |       |       |       |       |       |       |       |       |       |       |       |       |       |       |       |       |       |       |       |       |       |       |       |       |       |       |       |       |       |       |       |       |       |       |       |       |       |       |       |       |       |       |       |       |       |       |       |       |       |       |       |       |       |       |       |       |       |       |       |       |       |       |       |       |       |       |       |       |       |       |       |       |       |       |       |       |       |       |       |       |       |       |       |       |       |       |       |       |       |       |       |       |       |       |       |       |       |       |       |       |       |       |       |       |       |       |       |       |       |       |       |       |       |       |       |       |       |       |       |       |       |       |       |       |       |       |       |       |       |       |       |       |       |       |       |       |       |       |       |       |       |       |       |       |       |       |       |       |       |       |       |       |       |       |       |       |       |       |       |       |       |       |       |       |       |       |       |       |       |       |       |       |       |       |       |       |       |       |       |       |       |       |       |       |       |       |       |       |       |       |       |       |       |       |       |       |       |       |       |       |       |       |       |       |       |       |       |       |       |       |       |       |       |       |       |       |       |       |       |       |       |       |       |       |       |       |       |       |       |       |       |       |       |       |       |       |       |       |       |       |       |       |       |       |       |       |       |       |       |       |       |       |       |       |       |       |       |       |       |       |       |       |       |       |       |       |       |       |       |       |       |       |       |       |       |       |       |       |       |       |       |       |       |       |       |       |       |       |       |       |       |       |       |       |       |       |       |       |       |       |       |       |       |       |       |       |       |       |       |       |       |       |       |       |       |       |       |       |       |       |       |       |       |       |       |       |       |       |       |       |       |       |       |       |       |       |       |       |       |       |       |       |       |       |       |       |       |       |       |       |       |       |       |       |       |       |       |       |       |       |       |       |       |       |       |       |       |       |       |       |       |       |       |       |       |       |       |       |       |       |       |       |       |       |       |       |       |       |       |       |       |       |       |       |       |       |       |       |       |       |       |       |       |       |       |       |       |       |       |       |       |       |       |       |       |       |       |       |       |       |       |       |       |       |       |       |       |       |       |       |       |       |       |       |       |       |       |       |       |       |       |       |       |       |       |       |       |       |       |       |       |       |       |       |       |       |       |       |       |       |       |       |       |       |       |       |       |       |       |       |       |       |       |       |       |       |       |       |       |       |       |       |       |       |       |       |       |       |       |       |       |       |       |       |       |       |       |       |       |       |       |       |       |       |       |       |       |       |       |       |       |       |       |       |       |       |       |       |       |       |       |       |       |       |       |       |       |       |       |       |       |       |       |       |       |       |       |       |       |       |       |       |       |       |       |       |       |       |       |       |       |       |       |       |       |       |       |       |       |       |       |       |       |       |       |       |       |       |       |       |       |       |       |       |       |       |       |       |       |       |       |       |       |       |       |       |       |       |       |       |       |       |       |       |       |       |       |       |       |       |       |       |       |       |       |       |       |       |       |       |       |       |       |       |       |       |       |       |       |       |       |       |       |       |       |       |       |       |       |       |       |       |       |       |       |       |       |       |       |       |       |       |       |       |       |       |       |       |       |       |       |       |       |       |       |       |       |       |       |       |       |       |       |       |       |       |       |       |       |       |       |       |       |       |       |       |       |       |       |       |       |       |       |       |       |       |       |       |       |       |       |       |       |       |       |       |       |       |       |       |       |       |       |       |       |       |       |       |       |       |       |       |       |       |       |       |       |       |       |       |       |       |       |       |       |       |       |       |       |       |       |       |       |       |       |       |       |       |       |       |       |       |       |       |       |       |       |       |       |       |       |       |       |       |       |       |       |       |       |       |       |       |       |       |       |       |       |       |       |       |       |       |       |       |       |       |       |       |       |       |       |       |       |       |       |       |       |       |       |       |       |       |       |       |       |
|--------------|-------|-------|-------|-------|-------|-------|-------|-------|-------|-------|-------|-------|-------|-------|-------|-------|-------|-------|-------|-------|-------|-------|-------|-------|-------|-------|-------|-------|-------|-------|-------|-------|-------|-------|-------|-------|-------|-------|-------|-------|-------|-------|-------|-------|-------|-------|-------|-------|-------|-------|-------|-------|-------|-------|-------|-------|-------|-------|-------|-------|-------|-------|-------|-------|-------|-------|-------|-------|-------|-------|-------|-------|-------|-------|-------|-------|-------|-------|-------|-------|-------|-------|-------|-------|-------|-------|-------|-------|-------|-------|-------|-------|-------|-------|-------|-------|-------|-------|-------|-------|-------|-------|-------|-------|-------|-------|-------|-------|-------|-------|-------|-------|-------|-------|-------|-------|-------|-------|-------|-------|-------|-------|-------|-------|-------|-------|-------|-------|-------|-------|-------|-------|-------|-------|-------|-------|-------|-------|-------|-------|-------|-------|-------|-------|-------|-------|-------|-------|-------|-------|-------|-------|-------|-------|-------|-------|-------|-------|-------|-------|-------|-------|-------|-------|-------|-------|-------|-------|-------|-------|-------|-------|-------|-------|-------|-------|-------|-------|-------|-------|-------|-------|-------|-------|-------|-------|-------|-------|-------|-------|-------|-------|-------|-------|-------|-------|-------|-------|-------|-------|-------|-------|-------|-------|-------|-------|-------|-------|-------|-------|-------|-------|-------|-------|-------|-------|-------|-------|-------|-------|-------|-------|-------|-------|-------|-------|-------|-------|-------|-------|-------|-------|-------|-------|-------|-------|-------|-------|-------|-------|-------|-------|-------|-------|-------|-------|-------|-------|-------|-------|-------|-------|-------|-------|-------|-------|-------|-------|-------|-------|-------|-------|-------|-------|-------|-------|-------|-------|-------|-------|-------|-------|-------|-------|-------|-------|-------|-------|-------|-------|-------|-------|-------|-------|-------|-------|-------|-------|-------|-------|-------|-------|-------|-------|-------|-------|-------|-------|-------|-------|-------|-------|-------|-------|-------|-------|-------|-------|-------|-------|-------|-------|-------|-------|-------|-------|-------|-------|-------|-------|-------|-------|-------|-------|-------|-------|-------|-------|-------|-------|-------|-------|-------|-------|-------|-------|-------|-------|-------|-------|-------|-------|-------|-------|-------|-------|-------|-------|-------|-------|-------|-------|-------|-------|-------|-------|-------|-------|-------|-------|-------|-------|-------|-------|-------|-------|-------|-------|-------|-------|-------|-------|-------|-------|-------|-------|-------|-------|-------|-------|-------|-------|-------|-------|-------|-------|-------|-------|-------|-------|-------|-------|-------|-------|-------|-------|-------|-------|-------|-------|-------|-------|-------|-------|-------|-------|-------|-------|-------|-------|-------|-------|-------|-------|-------|-------|-------|-------|-------|-------|-------|-------|-------|-------|-------|-------|-------|-------|-------|-------|-------|-------|-------|-------|-------|-------|-------|-------|-------|-------|-------|-------|-------|-------|-------|-------|-------|-------|-------|-------|-------|-------|-------|-------|-------|-------|-------|-------|-------|-------|-------|-------|-------|-------|-------|-------|-------|-------|-------|-------|-------|-------|-------|-------|-------|-------|-------|-------|-------|-------|-------|-------|-------|-------|-------|-------|-------|-------|-------|-------|-------|-------|-------|-------|-------|-------|-------|-------|-------|-------|-------|-------|-------|-------|-------|-------|-------|-------|-------|-------|-------|-------|-------|-------|-------|-------|-------|-------|-------|-------|-------|-------|-------|-------|-------|-------|-------|-------|-------|-------|-------|-------|-------|-------|-------|-------|-------|-------|-------|-------|-------|-------|-------|-------|-------|-------|-------|-------|-------|-------|-------|-------|-------|-------|-------|-------|-------|-------|-------|-------|-------|-------|-------|-------|-------|-------|-------|-------|-------|-------|-------|-------|-------|-------|-------|-------|-------|-------|-------|-------|-------|-------|-------|-------|-------|-------|-------|-------|-------|-------|-------|-------|-------|-------|-------|-------|-------|-------|-------|-------|-------|-------|-------|-------|-------|-------|-------|-------|-------|-------|-------|-------|-------|-------|-------|-------|-------|-------|-------|-------|-------|-------|-------|-------|-------|-------|-------|-------|-------|-------|-------|-------|-------|-------|-------|-------|-------|-------|-------|-------|-------|-------|-------|-------|-------|-------|-------|-------|-------|-------|-------|-------|-------|-------|-------|-------|-------|-------|-------|-------|-------|-------|-------|-------|-------|-------|-------|-------|-------|-------|-------|-------|-------|-------|-------|-------|-------|-------|-------|-------|-------|-------|-------|-------|-------|-------|-------|-------|-------|-------|-------|-------|-------|-------|-------|-------|-------|-------|-------|-------|-------|-------|-------|-------|-------|-------|-------|-------|-------|-------|-------|-------|-------|-------|-------|-------|-------|-------|-------|-------|-------|-------|-------|-------|-------|-------|-------|-------|-------|-------|-------|-------|-------|-------|-------|-------|-------|-------|-------|-------|-------|-------|-------|-------|-------|-------|-------|-------|-------|-------|-------|-------|-------|-------|-------|-------|-------|-------|-------|-------|-------|-------|-------|-------|-------|-------|-------|-------|-------|-------|-------|-------|-------|-------|-------|-------|-------|-------|-------|-------|-------|-------|-------|-------|-------|-------|-------|-------|-------|-------|-------|-------|-------|-------|-------|-------|-------|-------|-------|-------|-------|-------|-------|-------|-------|-------|-------|-------|-------|-------|-------|-------|-------|-------|-------|-------|-------|-------|-------|-------|-------|-------|-------|-------|-------|-------|-------|-------|-------|-------|-------|-------|-------|-------|-------|-------|-------|-------|-------|-------|-------|-------|-------|-------|-------|-------|-------|-------|-------|-------|-------|-------|-------|-------|-------|-------|-------|-------|-------|-------|-------|-------|-------|-------|-------|-------|-------|-------|-------|-------|-------|-------|-------|-------|-------|-------|-------|
| conservation | ..... | ..... | ..... | ..... | ..... | ..... | ..... | ..... | ..... | ..... | ..... | ..... | ..... | ..... | ..... | ..... | ..... | ..... | ..... | ..... | ..... | ..... | ..... | ..... | ..... | ..... | ..... | ..... | ..... | ..... | ..... | ..... | ..... | ..... | ..... | ..... | ..... | ..... | ..... | ..... | ..... | ..... | ..... | ..... | ..... | ..... | ..... | ..... | ..... | ..... | ..... | ..... | ..... | ..... | ..... | ..... | ..... | ..... | ..... | ..... | ..... | ..... | ..... | ..... | ..... | ..... | ..... | ..... | ..... | ..... | ..... | ..... | ..... | ..... | ..... | ..... | ..... | ..... | ..... | ..... | ..... | ..... | ..... | ..... | ..... | ..... | ..... | ..... | ..... | ..... | ..... | ..... | ..... | ..... | ..... | ..... | ..... | ..... | ..... | ..... | ..... | ..... | ..... | ..... | ..... | ..... | ..... | ..... | ..... | ..... | ..... | ..... | ..... | ..... | ..... | ..... | ..... | ..... | ..... | ..... | ..... | ..... | ..... | ..... | ..... | ..... | ..... | ..... | ..... | ..... | ..... | ..... | ..... | ..... | ..... | ..... | ..... | ..... | ..... | ..... | ..... | ..... | ..... | ..... | ..... | ..... | ..... | ..... | ..... | ..... | ..... | ..... | ..... | ..... | ..... | ..... | ..... | ..... | ..... | ..... | ..... | ..... | ..... | ..... | ..... | ..... | ..... | ..... | ..... | ..... | ..... | ..... | ..... | ..... | ..... | ..... | ..... | ..... | ..... | ..... | ..... | ..... | ..... | ..... | ..... | ..... | ..... | ..... | ..... | ..... | ..... | ..... | ..... | ..... | ..... | ..... | ..... | ..... | ..... | ..... | ..... | ..... | ..... | ..... | ..... | ..... | ..... | ..... | ..... | ..... | ..... | ..... | ..... | ..... | ..... | ..... | ..... | ..... | ..... | ..... | ..... | ..... | ..... | ..... | ..... | ..... | ..... | ..... | ..... | ..... | ..... | ..... | ..... | ..... | ..... | ..... | ..... | ..... | ..... | ..... | ..... | ..... | ..... | ..... | ..... | ..... | ..... | ..... | ..... | ..... | ..... | ..... | ..... | ..... | ..... | ..... | ..... | ..... | ..... | ..... | ..... | ..... | ..... | ..... | ..... | ..... | ..... | ..... | ..... | ..... | ..... | ..... | ..... | ..... | ..... | ..... | ..... | ..... | ..... | ..... | ..... | ..... | ..... | ..... | ..... | ..... | ..... | ..... | ..... | ..... | ..... | ..... | ..... | ..... | ..... | ..... | ..... | ..... | ..... | ..... | ..... | ..... | ..... | ..... | ..... | ..... | ..... | ..... | ..... | ..... | ..... | ..... | ..... | ..... | ..... | ..... | ..... | ..... | ..... | ..... | ..... | ..... | ..... | ..... | ..... | ..... | ..... | ..... | ..... | ..... | ..... | ..... | ..... | ..... | ..... | ..... | ..... | ..... | ..... | ..... | ..... | ..... | ..... | ..... | ..... | ..... | ..... | ..... | ..... | ..... | ..... | ..... | ..... | ..... | ..... | ..... | ..... | ..... | ..... | ..... | ..... | ..... | ..... | ..... | ..... | ..... | ..... | ..... | ..... | ..... | ..... | ..... | ..... | ..... | ..... | ..... | ..... | ..... | ..... | ..... | ..... | ..... | ..... | ..... | ..... | ..... | ..... | ..... | ..... | ..... | ..... | ..... | ..... | ..... | ..... | ..... | ..... | ..... | ..... | ..... | ..... | ..... | ..... | ..... | ..... | ..... | ..... | ..... | ..... | ..... | ..... | ..... | ..... | ..... | ..... | ..... | ..... | ..... | ..... | ..... | ..... | ..... | ..... | ..... | ..... | ..... | ..... | ..... | ..... | ..... | ..... | ..... | ..... | ..... | ..... | ..... | ..... | ..... | ..... | ..... | ..... | ..... | ..... | ..... | ..... | ..... | ..... | ..... | ..... | ..... | ..... | ..... | ..... | ..... | ..... | ..... | ..... | ..... | ..... | ..... | ..... | ..... | ..... | ..... | ..... | ..... | ..... | ..... | ..... | ..... | ..... | ..... | ..... | ..... | ..... | ..... | ..... | ..... | ..... | ..... | ..... | ..... | ..... | ..... | ..... | ..... | ..... | ..... | ..... | ..... | ..... | ..... | ..... | ..... | ..... | ..... | ..... | ..... | ..... | ..... | ..... | ..... | ..... | ..... | ..... | ..... | ..... | ..... | ..... | ..... | ..... | ..... | ..... | ..... | ..... | ..... | ..... | ..... | ..... | ..... | ..... | ..... | ..... | ..... | ..... | ..... | ..... | ..... | ..... | ..... | ..... | ..... | ..... | ..... | ..... | ..... | ..... | ..... | ..... | ..... | ..... | ..... | ..... | ..... | ..... | ..... | ..... | ..... | ..... | ..... | ..... | ..... | ..... | ..... | ..... | ..... | ..... | ..... | ..... | ..... | ..... | ..... | ..... | ..... | ..... | ..... | ..... | ..... | ..... | ..... | ..... | ..... | ..... | ..... | ..... | ..... | ..... | ..... | ..... | ..... | ..... | ..... | ..... | ..... | ..... | ..... | ..... | ..... | ..... | ..... | ..... | ..... | ..... | ..... | ..... | ..... | ..... | ..... | ..... | ..... | ..... | ..... | ..... | ..... | ..... | ..... | ..... | ..... | ..... | ..... | ..... | ..... | ..... | ..... | ..... | ..... | ..... | ..... | ..... | ..... | ..... | ..... | ..... | ..... | ..... | ..... | ..... | ..... | ..... | ..... | ..... | ..... | ..... | ..... | ..... | ..... | ..... | ..... | ..... | ..... | ..... | ..... | ..... | ..... | ..... | ..... | ..... | ..... | ..... | ..... | ..... | ..... | ..... | ..... | ..... | ..... | ..... | ..... | ..... | ..... | ..... | ..... | ..... | ..... | ..... | ..... | ..... | ..... | ..... | ..... | ..... | ..... | ..... | ..... | ..... | ..... | ..... | ..... | ..... | ..... | ..... | ..... | ..... | ..... | ..... | ..... | ..... | ..... | ..... | ..... | ..... | ..... | ..... | ..... | ..... | ..... | ..... | ..... | ..... | ..... | ..... | ..... | ..... | ..... | ..... | ..... | ..... | ..... | ..... | ..... | ..... | ..... | ..... | ..... | ..... | ..... | ..... | ..... | ..... | ..... | ..... | ..... | ..... | ..... | ..... | ..... | ..... | ..... | ..... | ..... | ..... | ..... | ..... | ..... | ..... | ..... | ..... | ..... | ..... | ..... | ..... | ..... | ..... | ..... | ..... | ..... | ..... | ..... | ..... | ..... | ..... | ..... | ..... | ..... | ..... | ..... | ..... | ..... | ..... | ..... | ..... | ..... | ..... | ..... | ..... | ..... | ..... | ..... | ..... | ..... | ..... | ..... | ..... | ..... | ..... | ..... | ..... | ..... | ..... | ..... | ..... | ..... | ..... | ..... | ..... | ..... | ..... | ..... | ..... | ..... | ..... | ..... | ..... | ..... | ..... | ..... | ..... | ..... | ..... | ..... | ..... | ..... | ..... | ..... | ..... | ..... | ..... | ..... | ..... | ..... | ..... | ..... | ..... | ..... | ..... | ..... | ..... | ..... | ..... | ..... | ..... | ..... | ..... | ..... | ..... | ..... | ..... | ..... | ..... | ..... | ..... | ..... | ..... | ..... | ..... | ..... | ..... | ..... | ..... | ..... | ..... | ..... | ..... | ..... | ..... | ..... | ..... | ..... | ..... | ..... | ..... | ..... | ..... | ..... | ..... | ..... | ..... | ..... | ..... | ..... | ..... | ..... | ..... | ..... | ..... | ..... | ..... | ..... | ..... | ..... | ..... | ..... | ..... | ..... | ..... | ..... | ..... |
|--------------|-------|-------|-------|-------|-------|-------|-------|-------|-------|-------|-------|-------|-------|-------|-------|-------|-------|-------|-------|-------|-------|-------|-------|-------|-------|-------|-------|-------|-------|-------|-------|-------|-------|-------|-------|-------|-------|-------|-------|-------|-------|-------|-------|-------|-------|-------|-------|-------|-------|-------|-------|-------|-------|-------|-------|-------|-------|-------|-------|-------|-------|-------|-------|-------|-------|-------|-------|-------|-------|-------|-------|-------|-------|-------|-------|-------|-------|-------|-------|-------|-------|-------|-------|-------|-------|-------|-------|-------|-------|-------|-------|-------|-------|-------|-------|-------|-------|-------|-------|-------|-------|-------|-------|-------|-------|-------|-------|-------|-------|-------|-------|-------|-------|-------|-------|-------|-------|-------|-------|-------|-------|-------|-------|-------|-------|-------|-------|-------|-------|-------|-------|-------|-------|-------|-------|-------|-------|-------|-------|-------|-------|-------|-------|-------|-------|-------|-------|-------|-------|-------|-------|-------|-------|-------|-------|-------|-------|-------|-------|-------|-------|-------|-------|-------|-------|-------|-------|-------|-------|-------|-------|-------|-------|-------|-------|-------|-------|-------|-------|-------|-------|-------|-------|-------|-------|-------|-------|-------|-------|-------|-------|-------|-------|-------|-------|-------|-------|-------|-------|-------|-------|-------|-------|-------|-------|-------|-------|-------|-------|-------|-------|-------|-------|-------|-------|-------|-------|-------|-------|-------|-------|-------|-------|-------|-------|-------|-------|-------|-------|-------|-------|-------|-------|-------|-------|-------|-------|-------|-------|-------|-------|-------|-------|-------|-------|-------|-------|-------|-------|-------|-------|-------|-------|-------|-------|-------|-------|-------|-------|-------|-------|-------|-------|-------|-------|-------|-------|-------|-------|-------|-------|-------|-------|-------|-------|-------|-------|-------|-------|-------|-------|-------|-------|-------|-------|-------|-------|-------|-------|-------|-------|-------|-------|-------|-------|-------|-------|-------|-------|-------|-------|-------|-------|-------|-------|-------|-------|-------|-------|-------|-------|-------|-------|-------|-------|-------|-------|-------|-------|-------|-------|-------|-------|-------|-------|-------|-------|-------|-------|-------|-------|-------|-------|-------|-------|-------|-------|-------|-------|-------|-------|-------|-------|-------|-------|-------|-------|-------|-------|-------|-------|-------|-------|-------|-------|-------|-------|-------|-------|-------|-------|-------|-------|-------|-------|-------|-------|-------|-------|-------|-------|-------|-------|-------|-------|-------|-------|-------|-------|-------|-------|-------|-------|-------|-------|-------|-------|-------|-------|-------|-------|-------|-------|-------|-------|-------|-------|-------|-------|-------|-------|-------|-------|-------|-------|-------|-------|-------|-------|-------|-------|-------|-------|-------|-------|-------|-------|-------|-------|-------|-------|-------|-------|-------|-------|-------|-------|-------|-------|-------|-------|-------|-------|-------|-------|-------|-------|-------|-------|-------|-------|-------|-------|-------|-------|-------|-------|-------|-------|-------|-------|-------|-------|-------|-------|-------|-------|-------|-------|-------|-------|-------|-------|-------|-------|-------|-------|-------|-------|-------|-------|-------|-------|-------|-------|-------|-------|-------|-------|-------|-------|-------|-------|-------|-------|-------|-------|-------|-------|-------|-------|-------|-------|-------|-------|-------|-------|-------|-------|-------|-------|-------|-------|-------|-------|-------|-------|-------|-------|-------|-------|-------|-------|-------|-------|-------|-------|-------|-------|-------|-------|-------|-------|-------|-------|-------|-------|-------|-------|-------|-------|-------|-------|-------|-------|-------|-------|-------|-------|-------|-------|-------|-------|-------|-------|-------|-------|-------|-------|-------|-------|-------|-------|-------|-------|-------|-------|-------|-------|-------|-------|-------|-------|-------|-------|-------|-------|-------|-------|-------|-------|-------|-------|-------|-------|-------|-------|-------|-------|-------|-------|-------|-------|-------|-------|-------|-------|-------|-------|-------|-------|-------|-------|-------|-------|-------|-------|-------|-------|-------|-------|-------|-------|-------|-------|-------|-------|-------|-------|-------|-------|-------|-------|-------|-------|-------|-------|-------|-------|-------|-------|-------|-------|-------|-------|-------|-------|-------|-------|-------|-------|-------|-------|-------|-------|-------|-------|-------|-------|-------|-------|-------|-------|-------|-------|-------|-------|-------|-------|-------|-------|-------|-------|-------|-------|-------|-------|-------|-------|-------|-------|-------|-------|-------|-------|-------|-------|-------|-------|-------|-------|-------|-------|-------|-------|-------|-------|-------|-------|-------|-------|-------|-------|-------|-------|-------|-------|-------|-------|-------|-------|-------|-------|-------|-------|-------|-------|-------|-------|-------|-------|-------|-------|-------|-------|-------|-------|-------|-------|-------|-------|-------|-------|-------|-------|-------|-------|-------|-------|-------|-------|-------|-------|-------|-------|-------|-------|-------|-------|-------|-------|-------|-------|-------|-------|-------|-------|-------|-------|-------|-------|-------|-------|-------|-------|-------|-------|-------|-------|-------|-------|-------|-------|-------|-------|-------|-------|-------|-------|-------|-------|-------|-------|-------|-------|-------|-------|-------|-------|-------|-------|-------|-------|-------|-------|-------|-------|-------|-------|-------|-------|-------|-------|-------|-------|-------|-------|-------|-------|-------|-------|-------|-------|-------|-------|-------|-------|-------|-------|-------|-------|-------|-------|-------|-------|-------|-------|-------|-------|-------|-------|-------|-------|-------|-------|-------|-------|-------|-------|-------|-------|-------|-------|-------|-------|-------|-------|-------|-------|-------|-------|-------|-------|-------|-------|-------|-------|-------|-------|-------|-------|-------|-------|-------|-------|-------|-------|-------|-------|-------|-------|-------|-------|-------|-------|-------|-------|-------|-------|-------|-------|-------|-------|-------|-------|-------|-------|-------|-------|-------|-------|-------|-------|-------|-------|-------|-------|

| conservation                         | 110            | 120        | 130               | 140          | 150                 | 160                | 170                | 180             |             |
|--------------------------------------|----------------|------------|-------------------|--------------|---------------------|--------------------|--------------------|-----------------|-------------|
| <i>Callorhinchus milii</i>           | CAAGATCTGGTTT  | TACAAGAGCT | TCAC              | TGGCCTCA     | TGGGAATAT           | AACACCAACAT        | CACGGATGAA         | AACATAGACA      | AAATGAA 188 |
| <i>Alligator mississippiensis</i>    | GAAGGCCTGTATT  | TATGAAAGTT | CACTTGCTTCA       | TGGGCTTACA   | ACCAACACATT         | ACAGAAGAGAAATGCCA  | AGAAATGAA          |                 | 173         |
| <i>Anolis carolinensis</i>           | GAAAACCGATCTT  | TATGAAAGTT | CACTCGCTTCA       | TGGGATTATA   | ACCAACACAT          | CACAGAAGAGAAATGCCA | AGAGGATGAA         |                 | 212         |
| <i>Astyanax mexicanus</i>            | TCTCGCCTCATGT  | TACCA      | GTACTCCCTGGCGTCC  | TGGGCC       | TACAACACCAACAT      | CACAACAGAGAACTCGA  | ACA                | AACTGGC 185     |             |
| <i>Boleophthalmus pectinirostris</i> | TCAGCGCTGATGT  | TACA       | ACTATTCTCTAGCGTCA | TGGGCATATA   | AACTGACATCTCTC      | AGGAAAAATGCCA      | ACA                | AAGAGTC 194     |             |
| <i>Cynoglossus semilaevis</i>        | AGTGCCCTCATGT  | TATA       | ACTATTCTCTGGCATCA | TGGGCTTACA   | ACCAACACAT          | CACAAGGAGAACTCGG   | AAATATTGGC 185     |                 |             |
| <i>Danio rerio</i>                   | TCTGACATCATGT  | TACCA      | GTACACCTTGCTATCC  | TGGGCTTACA   | ACAGATATCTCC        | AGGAAATGCAGAT      | AAAGAGGC 185       |                 |             |
| <i>Esox lucius</i>                   | ACTGATCTTTATGT | TATA       | AGTATTCTTTGTCTCAT | TGGGCATACA   | ACATAAACAT          | CACCCAGGAGAAATTTAG | ACAAATGGG 191      |                 |             |
| <i>Fundulus heteroclitus</i>         | AGCGAGAAGATGT  | TACCA      | GTACTCACTGGCATCA  | TGGGCC       | TACAACACCGACAT      | CAGCCAGGAGAACTCGG  | ACA                | AAATTGTC 197    |             |
| <i>Gekko japonicus</i>               | GAAAATCTGTCTT  | TATG       | AAAAC             | CACTTGCTTCA  | TGGAATTACA          | ATACCAATATCA       | CAGAGGAGAAATGCCTGG | AAGATGGA 185    |             |
| <i>Haplochromis burtoni</i>          | AGTGACCTTATGT  | TACCA      | GTACTCGCTGGCATCA  | TGGGCC       | TACAACACCAACAT      | CACACAGGAGAAATGCAG | ACA                | AAGAGGC 191     |             |
| <i>Hippocampus comes</i>             | AGTGAGCGTATGT  | TACCA      | GTACTCACTGGCATCA  | TGGGCC       | TACAACACCAACAT      | CACAAAGGAGAACTCAG  | AGAAATTGTC 191     |                 |             |
| <i>Ictalurus punctatus</i>           | TCTCGCCTCATGT  | TACC       | AGTATAGTCTCGCATCT | TGGGCC       | TACAACACCGACAT      | CACAGCGGAGAACTCCG  | ACA                | AACTGGC 185     |             |
| <i>Larimichthys crocea</i>           | ACTCAACGTATGT  | TACCA      | GTACTCGCTGGCATCA  | TGGGCC       | TACAACACCAACAT      | CACAAAAGAAACTCAG   | ACA                | AGCTGTT 191     |             |
| <i>Lates calcarifer</i>              | ACTGAGCGTATGT  | TACCA      | GTACTCTCTGGCATCA  | TGGGCC       | TACAACACCAACAT      | CACAAAGGAGAACTCTG  | ACA                | AACTGTC 191     |             |
| <i>Latimeria chalumnae</i>           | CAAGAAATCGCCT  | TATC       | AGTCA             | TCCCTAGCATCA | TGGGATTACA          | ATACAACATTACTGAT   | GAGAAATGCTA        | AAAAATGCGAA 320 |             |
| <i>Lepisosteus oculatus</i>          | ACCCATCTGACGT  | TACCT      | GAACTCACTGGCATCA  | TGGGAATACA   | ATACTAACATTACTG     | AGGAAATGCAA        | AAAAAGATGAA 185    |                 |             |
| <i>Macaca fascicularis</i>           | GAAGACCTGTTCT  | TATC       | AAAGTTCACTTGCTTCT | TGGAATTATA   | ACCAATATTACTGA      | AGAGAAATGTCC       | AAAAACATGAA 188    |                 |             |
| <i>Manacus vitellinus</i>            | GAAAATATCAGCT  | TACG       | AGAGCTCCATTGCTTCA | TGGAAC       | TACCAACGACATCACTG   | AGGAGAAATGCCA      | AAAAATGAA 191      |                 |             |
| <i>Mus musculus</i>                  | GAAGACCTGTCTT  | TATC       | AAAGTTCACTTGCTTCT | TGGAATTATA   | ATACTAACATTACTG     | AAGAAATGCCC        | AAAAAGATGAG 188    |                 |             |
| <i>Neolamprologus brichardi</i>      | AGTGACCTTATGT  | TACCA      | GTACTCGCTGGCATCA  | TGGGCC       | TACAACACCAACAT      | CACACAGGAGAACGCAG  | ACA                | AAGAGGC 191     |             |
| <i>Oncorhynchus mykiss</i>           | ACTCATCTCATGT  | TATC       | AGTATTCCCTGGCATCA | TGGGCGTACA   | ACACAGATATTTCC      | AGGAGAAATTTAG      | ACAACTGGG 194      |                 |             |
| <i>Oreochromis niloticus</i>         | AGTGACCTTATGT  | TACCA      | GTACTCGCTGGCATCA  | TGGGCC       | TACAACACCGACAT      | CACACAGGAGAACGCAG  | ACA                | AAGAGGC 191     |             |
| <i>Poecilia formosa</i>              | AGTGACAAGATGT  | TACA       | AGTACTCACTGGCATCG | TGGGCC       | TACAACACCGACATCACTC | AGGAGAACTCGG       | ACA                | AGTGTG 194      |             |
| <i>Poecilia latipinna</i>            | AGTGACAAGATGT  | TACA       | AGTACTCACTGGCATCG | TGGGCC       | TACAACACCGACATCACTC | AGGAGAACTCGG       | ACA                | AGTGTG 194      |             |
| <i>Pseudopodoces humilis</i>         | GAAAATATCAGCT  | TATG       | AGAACTCCATTGCGTCA | TGGAAC       | TACAACACCAACATCACTG | AGGAGAAATGCCA      | AAATGAG 185        |                 |             |
| <i>Pundamilia nyererei</i>           | AGTGACCTTATGT  | TACCA      | GTACTCGCTGGCATCA  | TGGGCC       | TACAACACCAACAT      | CACACAGGAGAACGCAG  | ACA                | AAGAGGC 191     |             |
| <i>Pygocentrus nattereri</i>         | TCCCGACTTATGT  | TACCA      | GTATTCTTGCTTCT    | TGGGAGTACA   | ACCAACATCA          | CAGCAGAACTCGGCC    | AACTGTC 185        |                 |             |
| <i>Python bivittatus</i>             | GATGATTTGTATT  | TATG       | ACGCATCCATTGCTTCA | TGGAATTATA   | ATACCAACATCA        | CAGAGAGAAATGCCA    | AAATGCA 185        |                 |             |
| <i>Rattus norvegicus</i>             | GAAGACCTGTCTT  | TATC       | AAAGTTCACTTGCTTCT | TGGAATTACA   | ACCAACATTACGG       | AGGAGAAATGCC       | AAAAAGATGAA 188    |                 |             |
| <i>Scleropages formosus</i>          | ACTACTCTGATGT  | TACCA      | GTATTCACTGGCGTCA  | TGGGAATACA   | ACCAACATCA          | CCAGTGAAAACTCAG    | ACA                | AACTGGC 194     |             |
| <i>Sinocyclocheilus anshuiensis</i>  | ACCAATCTCGTGT  | TACCA      | GTATTCCCTTGCTATCC | TGGGCC       | TACAACACAGATATCTCC  | AGGAAATGCAG        | ATA                | AAGAGGC 185     |             |
| <i>Xenopus tropicalis</i>            | GAAGTCCTTTATCT | ATC        | AAAGCGCACTTGCTTCT | TGGGAATACA   | ACCAACATCACTGAT     | GAAATGCCC          | AAAAATGAG 191      |                 |             |
| <i>Lipotes vexillifer</i>            | GAAGACCTGTCTT  | TATC       | AAAGTTCACTTGCTTCT | TGGAATTATA   | ACCAACATATTACCGAT   | GAGAAATGTCC        | AAAAAGATGAA 188    |                 |             |
| <i>Orcinus orca</i>                  | GAAGACCTGTCTT  | TATC       | AAAGTTCACTTGCTTCT | TGGAATTATA   | ACCAACATATTACCGAT   | GAGAAATGTCC        | AAAAAGATGAA 188    |                 |             |
| <i>Homo sapiens</i>                  | GAAGACCTGTTCT  | TATC       | AAAGTTCACTTGCTTCT | TGGAATTATA   | ACCAACATATTACTGA    | AGAGAAATGTCC       | AAAAACATGAA 188    |                 |             |







| conservation                         | 500                                                                                | 510 | 520 | 530 | 540 | 550 | 560 | 570 |  |
|--------------------------------------|------------------------------------------------------------------------------------|-----|-----|-----|-----|-----|-----|-----|--|
| <i>Callorhinchus milii</i>           | GCTGGAGACATAATGTTGGGAAGGCGCTTAGACCACCTTTACGAAGATTATGCAGATCTGAAGAATAAGGCAGCAAAGCTG  | 579 |     |     |     |     |     |     |  |
| <i>Alligator mississippiensis</i>    | GTTGGAGAGCAGACATTGGCAAGAAGATGAGGCCACTGTATGAAGAATATGTTGAACCTGAAAAATGAAGCTGCAAGGAGT  | 570 |     |     |     |     |     |     |  |
| <i>Anolis carolinensis</i>           | GTTGGAGAGCTGATGTTGGGAAAGAAAATGAGGCCCTTGTATGAAGGTTATGTTGAATTGAACAATGAGGCTGCAAGAAGT  | 603 |     |     |     |     |     |     |  |
| <i>Astyanax mexicanus</i>            | GCTGGAGGGTTCAGTGGGAAGAAAGATGAGGAAGCTGTATGAAGAGTACGCAGACCTGAAGAACGAAGCAGCCAAACTC    | 576 |     |     |     |     |     |     |  |
| <i>Boleophthalmus pectinirostris</i> | GCTGGAGACAGGAAGTGGGTAAAAGGATGAGGACGCTGTATGAAGACTACGTAGATCTGAAGAACGAAGCAGCCAAACTC   | 585 |     |     |     |     |     |     |  |
| <i>Cynoglossus semilaevis</i>        | GCTGGAGGAAGGAAGTGGGAGGAGAATGAGGCCCTCTGTATGAGGACTACGCCGATCTGAAGAACGAAGCTGCCAAACTC   | 576 |     |     |     |     |     |     |  |
| <i>Danio rerio</i>                   | GCTGGAGAGTGGCCACAGGATGAAGATGAGACCTCTGTATGAAGAAATACGTCGACCTGAAGAATGAAGCTGCCAAGCTC   | 576 |     |     |     |     |     |     |  |
| <i>Esox lucius</i>                   | GCTGGAGAGTGGAGGTGGGAAGAAGATGAGGCCCTCTCTATGAAGATTACGTGGACCTGAAGAACGAAGCTGCCAAACTC   | 585 |     |     |     |     |     |     |  |
| <i>Fundulus heteroclitus</i>         | GCTGGAGGAAAAGAGGTGGGAAGAAGATGAGGCCCTTGTACGAAGACTATGTGGACCTGAAGAATGAAGCTGCCAAACTT   | 588 |     |     |     |     |     |     |  |
| <i>Gekko japonicus</i>               | GCTGGAGAGCTGACATTGGCAAGAAAATGAGGCCCTTTATATGAAGGTTATGTTGAACCTGAAGAATGAGATTGCAAGGGGG | 576 |     |     |     |     |     |     |  |
| <i>Haplochromis burtoni</i>          | GCTGGAGGAAAAGAAGTAGGAAAGAGGATGAGACCTCTCTACGAAGACTACGTGGATCTGAAGAATGAAGCTGCCAAGCTA  | 582 |     |     |     |     |     |     |  |
| <i>Hippocampus comes</i>             | GTTGGAGGAGGAGGTGGGAAGAGGATGAGGCCGCTCTATGAAGACTATGTGCTTCTGAAGAACGAAGCTGCCAAACTG     | 582 |     |     |     |     |     |     |  |
| <i>Ictalurus punctatus</i>           | GCTGGCGGGTGCAGGTGGGAAGAAGATGAGGCGACTCTATGAAGACTATGTGGACTTGAAGAACGAAGCTGCCAGGCTG    | 576 |     |     |     |     |     |     |  |
| <i>Larimichthys crocea</i>           | GCTGGAGGAGAGAGGTGGGAAGAGGATGAGGCCCTGTATGAAGACTATGTGGATCTGAAGAATGAAGCTTCCAAATTA     | 582 |     |     |     |     |     |     |  |
| <i>Lates calcarifer</i>              | GCTGGAGGAAAAGAGGTGGGAAGAGGATGAGGCCCTCTGTACGAAGATTATGTGGATCTGAAGAATGAAGCTGCCATACTA  | 582 |     |     |     |     |     |     |  |
| <i>Latimeria chalumnae</i>           | GCTGGAGAGTGGAGGTGGCAAGAAGATGAGGCCACTTTATGAAGAAATATGTAGAACTGAAAAACACTGCAGCTAAAATG   | 711 |     |     |     |     |     |     |  |
| <i>Lepisosteus oculatus</i>          | GCTGGAGGGTTGCAGTGGGAAGAAAATGAGACCCTCTACGAAGACTATGTGGACTTGAAAAACGAAGCGCAAAACTC      | 576 |     |     |     |     |     |     |  |
| <i>Macaca fascicularis</i>           | GCTGGAGATCTGAGGTGGCAAGCAGCTGAGGCCATTATATGAAGAGTATGTGGTCTTGAAAAATGAGATGGCAAGAGCA    | 579 |     |     |     |     |     |     |  |
| <i>Manacus vitellinus</i>            | GCTGGAGAGCTGATGTTGGCAGGATGATGAGACCAATTATACGAAGAGTATGTTGAGCTTGAAAAACGAGGTTGCGAAGCTT | 582 |     |     |     |     |     |     |  |
| <i>Mus musculus</i>                  | GCTGGAGGGCTGAGGTTGGCAAGCAGCTGAGGCCGTTGTATGAAGAGTATGTGGTCTTGAAAAACGAGATGGCAAGAGCA   | 579 |     |     |     |     |     |     |  |
| <i>Neolamprologus brichardi</i>      | GCTGGAGGAAAAGAACAGGAAAGAGGATGAGACCTCTCTACGAAGACTACGTGGATCTGAAGAATGAAGCTGCCAAGCTA   | 582 |     |     |     |     |     |     |  |
| <i>Oncorhynchus mykiss</i>           | GCTGGAGAGTGGAGGTAGGGAAGAAGATGAGGCCCTGTATGAAGACTATGTGGACCTTAAAGAACGAAGCTGCCAAACTC   | 588 |     |     |     |     |     |     |  |
| <i>Oreochromis niloticus</i>         | GCTGGAGGAAAAGAGTAGGAAGAGGATGAGACCTCTCTACGAAGACTACGTGGATCTGAAGAATGAAGCTGCCAAGCTA    | 582 |     |     |     |     |     |     |  |
| <i>Poecilia formosa</i>              | GCTGGAGGAGAGAGGTGGGAAAAGGATGAGGCCCTCTGTACGAAGACTATGTGGATCTGAAGAATGAAGCTGCCAACTG    | 585 |     |     |     |     |     |     |  |
| <i>Poecilia latipinna</i>            | GCTGGAGGAGAGAGGTGGGAAAAGGATGAGGCCCTCTGTACGAAGACTATGTGGATCTGAAGAATGAAGCTGCCAACTG    | 585 |     |     |     |     |     |     |  |
| <i>Pseudopodoces humilis</i>         | GCTGGAGGGCTGGTGTGGCAGGATGATGAGACCAATTATATGAAGAGTATGTTGAACCTTGAAAAATGAGGTTGCAAGGCTT | 576 |     |     |     |     |     |     |  |
| <i>Pundamilia nyererei</i>           | GCTGGAGGAAAAGAAGTAGGAAAGAGGATGAGACCTCTCTACGAAGACTACGTGGATCTGAAGAATGAAGCTGCCAAGCTA  | 582 |     |     |     |     |     |     |  |
| <i>Pygocentrus nattereri</i>         | GCTGGAGAGTTCAAGTGGGAAGAAAATGAGGTGGCTATATGAAGATTACGTGCACTGAAGAATGAAGCAGCCAAACTC     | 576 |     |     |     |     |     |     |  |
| <i>Python bivittatus</i>             | GCTGGAGAGCTGATGTTGGCAAGAAGATGAGGCCCTTTATATGAAGGTTATGTTGAACCTGAAAAATAAGTATGCAAGATTG | 567 |     |     |     |     |     |     |  |
| <i>Rattus norvegicus</i>             | GCTGGAGGGCTGAGGTGGCAAGCAGCTGAGGCCGTTATATGAAGAGTATGTGGTCTTGAAAAATGAGATGGCAAGAGCA    | 579 |     |     |     |     |     |     |  |
| <i>Scleropages formosus</i>          | GCTGGAGGGTGAATGTGGGAAGGAGATGAGGCCCTCTATGAAGTCTACGTGGACCTAAAGAACGAAGCTGCCAGACTG     | 585 |     |     |     |     |     |     |  |
| <i>Sinocyclocheilus anshuiensis</i>  | GATGGAGAGTGGCCGAGGGATGAAGATGAGACCCCTTTATGAGAAATATGTGGACCTGAAGAATGAAGCCGCCAAACTC    | 576 |     |     |     |     |     |     |  |
| <i>Xenopus tropicalis</i>            | GTTGGAGAGCTGGAGCTGGAAGAAAATGAGATCGTTGTATGAGGAATATGTTGATCTGGAAAAATGAGGCTGCCCGTCTT   | 582 |     |     |     |     |     |     |  |
| <i>Lipotes vexillifer</i>            | GCTGGAGGGCTGAGGTGGCAAGCAGCTGAGGCCATTTTATGAAGAGTATGTGGTCTTGAAAAATGAGATGGCCAGAGCC    | 576 |     |     |     |     |     |     |  |
| <i>Orcinus orca</i>                  | GCTGGAGGGCTGAGGTGGCAAGCAGCTGAGGCCATTATATGAAGAGTATGTGGTCTTGAAAAACGAGATGGCCAGAGCC    | 576 |     |     |     |     |     |     |  |
| <i>Homo sapiens</i>                  | GCTGGAGATCTGAGGTGGCAAGCAGCTGAGGCCATTATATGAAGAGTATGTGGTCTTGAAAAATGAGATGGCAAGAGCA    | 579 |     |     |     |     |     |     |  |

| conservation                         | 580                                                                               | 590       | 600                | 610 | 620 | 630 | 640 | 650 |  |
|--------------------------------------|-----------------------------------------------------------------------------------|-----------|--------------------|-----|-----|-----|-----|-----|--|
| <i>Callorhinchus milii</i>           | AATGGTTATCAAGACTATGGGATTACTGGCGGGGAAATTATGAGACGAAAGAC...                          | ATAGGC    | GAAATATGCATACAGTCC | 656 |     |     |     |     |  |
| <i>Alligator mississippiensis</i>    | AATAATTATAATGACTATGGAGATTACTGGAGAGGAAATTATGAAACAGATTTT...                         | CCTCCAGAA | TATAGATACAGTCC     | 647 |     |     |     |     |  |
| <i>Anolis carolinensis</i>           | AATGGTTATGCTGACTATGGAGATTACTGGAGAGCCGATTATGAAGTAGATTTC...                         | CCTGAGGAG | TATCGATACCCACG     | 680 |     |     |     |     |  |
| <i>Astyanax mexicanus</i>            | AACAATTATAAAGACTATGGAGATTACTGGAGAGCCAATTATGAAACAGAAAT...                          | GAGCCCAAA | TACAGCTACTCTCG     | 653 |     |     |     |     |  |
| <i>Boleophthalmus pectinirostris</i> | AACGGTTTTGAGGACTATGGGGCGTACTGGAGATATAACTATGAAACCATCGAAGAGCAGCCTCCCTACACTTACACCCG  |           |                    | 665 |     |     |     |     |  |
| <i>Cynoglossus semilaevis</i>        | AATAAGTTTAAAGACTATGGAGACTACTGGAGGTCCAACATATGAAACCGTTGAGGAGGTTGATAAGTACAAATACACCGG |           |                    | 656 |     |     |     |     |  |
| <i>Danio rerio</i>                   | AACAACCTACGAAGCCATGGAGATTATGGAGGGGAGATTATGAAACATTGAT...                           | GATCCCCAA | TACAGTTACTCCCG     | 653 |     |     |     |     |  |
| <i>Esox lucius</i>                   | AATGGTTATAAGGACCATTGGAGATTATGGAGGTCCAACATCGAAACCAACGAC...                         | GACAGCCCC | TACAAGTACCCAG      | 662 |     |     |     |     |  |
| <i>Fundulus heteroclitus</i>         | AACGGCTTTGAAGACTATGGAGCTTATGGAGATACAATTATGAGACCATTGAGGAAGACGTTTCAAGTACAAGTATACCAG |           |                    | 668 |     |     |     |     |  |
| <i>Gekko japonicus</i>               | ACTAATTATTCTGACTATGGAGATTACTGGAGAGGAAATTATGAAACAGATTAT...                         | CCCAGGATT | TATCGATACAGACG     | 653 |     |     |     |     |  |
| <i>Haplochromis burtoni</i>          | AATGGTTTTGAAGACTATGGCGCTTACTGGAGATACAACATATGAGACTCTTGAGGACGACATCATGTACCATTACACAGG |           |                    | 662 |     |     |     |     |  |
| <i>Hippocampus comes</i>             | AATGGGTTTTGAGGACTATGGCGCTTACTGGAGATATAACTATGAGACTATTGATGAGGAAAGTCCAACGATTATACCAG  |           |                    | 662 |     |     |     |     |  |
| <i>Ictalurus punctatus</i>           | AACAATTTTAAAGACCATTGGAGACTACTGGAGATCTAATTATGAAACAATTGAT...                        | GAGCCAAAT | TACAGCTACACTCG     | 653 |     |     |     |     |  |
| <i>Larimichthys crocea</i>           | AACAACCTTTGAAGACTATGGAGCTTACTGGAGATATAACTATGAGACCATTGAGGAGGATGCTCAGTTCAACTACACCAG |           |                    | 662 |     |     |     |     |  |
| <i>Lates calcarifer</i>              | AATGGTTTTGAAGACTATGGGGCTTATGGAGATATAACTATGAGACCATTGATGAGGACGTTTCAAGTACAAATATACCAG |           |                    | 662 |     |     |     |     |  |
| <i>Latimeria chalumnae</i>           | AATGGTTATTCTGATTATGGAGATTACTGGAGATCAAACACAAAAACAGGATACTACTGGAAAAATATGCCACTACTGG   |           |                    | 791 |     |     |     |     |  |
| <i>Lepisosteus oculatus</i>          | AACAACCTACAAAGATTATGGGACTATGGAGAGGAAACTATGAAGCTACAGAT...                          | GATGCAGTT | TACGCTTACACTCG     | 653 |     |     |     |     |  |
| <i>Macaca fascicularis</i>           | AATCATTTAAGGACTATGGGACTTATGGAGAGGAAACTATGAAGTAAACGG...                            | GTAGATGGC | TATGACTACAAACG     | 656 |     |     |     |     |  |
| <i>Manacus vitellinus</i>            | AATAATTATTCTGACTATGGAGATTACTGGAGAGCAAAATTATGAAGCCAGTTTT...                        | CCAAGAGGT | TATGAATACAGCCG     | 659 |     |     |     |     |  |
| <i>Mus musculus</i>                  | AACAATTATAACGACTATGGGATTATGGAGAGGGGACTATGAAGCAGAGGGA...                           | GCAGATGGC | TACAACATTAACCG     | 656 |     |     |     |     |  |
| <i>Neolamprologus brichardi</i>      | AATGGTTTTGAAGACTATGGCGCTTACTGGAGATACAACATATGAGACTCTTGAGGACGACATCATGTACCATTACACAGG |           |                    | 662 |     |     |     |     |  |
| <i>Oncorhynchus mykiss</i>           | AATGATTATGAGGACTACGGAGATTATGGCGGTCCAACATATGAAACTATCGAT...                         | GACAGCCCC | TACAACCTACGCCAG    | 665 |     |     |     |     |  |
| <i>Oreochromis niloticus</i>         | AATGGCTTTGAGGACTATGGCGCTTACTGGAGATACAACATATGAGACTCTTGAGGACGACGTCATGTACCATTACACAGG |           |                    | 662 |     |     |     |     |  |
| <i>Poecilia formosa</i>              | AATGGTTTTCAAGACTACGGAGCTTATGGAGATACAATTATGAGACCCCTCGATGAAGACGTTCCCTTACAAGTATACCAG |           |                    | 665 |     |     |     |     |  |
| <i>Poecilia latipinna</i>            | AATGGTTTTCAAGACTACGGAGCTTATGGAGATACAATTATGAGACCCCTCGATGAAGACGTTCCCTTACAAGTATACCAG |           |                    | 665 |     |     |     |     |  |
| <i>Pseudopodoces humilis</i>         | AATGGTTATTCTGACTATGGAGACTACTGGAGAGCAAAATTATGAAGCAAAGTCT...                        | CCAGAGAAG | TACAAATACAGCCG     | 653 |     |     |     |     |  |
| <i>Pundamilia nyererei</i>           | AATGGTTTTGAAGACTATGGCGCTTACTGGAGATACAACATATGAGACTCTTGAGGACGACATCATGTACCATTACACAGG |           |                    | 662 |     |     |     |     |  |
| <i>Pygocentrus nattereri</i>         | AATAATTATAAAGACTATGGGACTACTGGAGAGCCAATTATGAGACCATAGAT...                          | GAGCCCAT  | TATAGCTACACCCG     | 653 |     |     |     |     |  |
| <i>Python bivittatus</i>             | AGGGCTATGCTGACTATGGAGATTATGGAGAGCAAAATTATGAAGTAGATTCT...                          | CCACGAGAG | TATCAATACAAACG     | 644 |     |     |     |     |  |
| <i>Rattus norvegicus</i>             | AACAATTATGAAGACTATGGGATTATGGCGAGGGGATTATGAAGCAGAGGGA...                           | GTAGAAGGT | TACAACTAACCG       | 656 |     |     |     |     |  |
| <i>Scleropages formosus</i>          | AATGGTTATGCAGACTACGGGACTACTGGAGGGGCAACTACGAGACATCGAT...                           | GAGGGAACT | TACAGCTATACCCG     | 662 |     |     |     |     |  |
| <i>Sinocyclocheilus anshuiensis</i>  | AACAATTATGAAGACCATGGAGATTACTGGAGGGGGGATTATGAAACCATCGAT...                         | GAACCCAA  | TACAGTTACTCCCG     | 653 |     |     |     |     |  |
| <i>Xenopus tropicalis</i>            | AATGGTTATAATGACTATGGAGATTATGGAGAGGAAACTATGAACTCTGGCA...                           | ACAGACTGT | TATGCCATACAGCCG    | 659 |     |     |     |     |  |
| <i>Lipotes vexillifer</i>            | AACAATTATGAGGACTATGGGACTATGGAGAGGGGATTATGAAGTATGATGGG...                          | GCAGGTGAC | TATGACTACAGCCG     | 653 |     |     |     |     |  |
| <i>Orcinus orca</i>                  | AACAATTATGAGGACTATGGGACTATGGAGAGGGGATTATGAAGTACAGCGGG...                          | GCAGGTGAC | TATGACTACAGCCG     | 653 |     |     |     |     |  |
| <i>Homo sapiens</i>                  | AATCATTTATGAGGACTATGGGATTATGGAGAGGAGACTATGAAGTAAATGGG...                          | GTAGATGGC | TATGACTACAGCCG     | 656 |     |     |     |     |  |



| conservation               | 660 | 670 | 680 | 690 | 700 | 710 | 720 | 730 |   |   |   |   |   |   |   |   |   |   |   |   |   |   |   |   |   |   |   |   |   |   |   |   |   |   |   |   |   |   |   |   |   |   |   |   |   |   |   |   |   |   |   |   |   |   |   |   |   |   |   |   |   |   |   |   |   |   |   |   |   |   |   |   |   |   |   |   |   |   |   |   |   |   |   |   |   |   |   |   |   |   |   |   |   |   |   |   |   |   |   |   |   |   |   |   |   |   |   |   |   |   |   |   |   |   |   |   |   |   |   |   |   |   |   |   |   |   |   |   |   |   |   |   |   |   |   |   |   |   |   |   |   |   |   |   |   |   |   |   |   |   |   |   |   |   |   |   |   |   |   |   |   |   |   |   |   |   |   |   |   |   |   |   |   |   |   |   |   |   |   |   |   |   |   |   |   |   |   |   |   |   |   |   |   |   |   |   |   |   |   |   |   |   |   |   |   |   |   |   |   |   |   |   |   |   |   |   |   |   |   |   |   |   |   |   |   |   |   |   |   |   |   |   |   |   |   |   |   |   |   |   |   |   |   |   |   |   |   |   |   |   |   |   |   |   |   |   |   |   |   |   |   |   |   |   |   |   |   |   |   |   |   |   |   |   |   |   |   |   |   |   |   |   |   |   |   |   |   |   |   |   |   |   |   |   |   |   |   |   |   |   |   |   |   |   |   |   |   |   |   |   |   |   |   |   |   |   |   |   |   |   |   |   |   |   |   |   |   |   |   |   |   |   |   |   |   |   |   |   |   |   |   |   |   |   |   |   |   |   |   |   |   |   |   |   |   |   |   |   |   |   |   |   |   |   |   |   |   |   |   |   |   |   |   |   |   |   |   |   |   |   |   |   |   |   |   |   |   |   |   |   |   |   |   |   |   |   |   |   |   |   |   |   |   |   |   |   |   |   |   |   |   |   |   |   |   |   |   |   |   |   |   |   |   |   |   |   |   |   |   |   |   |   |   |   |   |   |   |   |   |   |   |   |   |   |   |   |   |   |   |   |   |   |   |   |   |   |   |   |   |   |   |   |   |   |   |   |   |   |   |   |   |   |   |   |   |   |   |   |   |   |   |   |   |   |   |   |   |   |   |   |   |   |   |   |   |   |   |   |   |   |   |   |   |   |   |   |   |   |   |   |   |   |   |   |   |   |   |   |   |   |   |   |   |   |   |   |   |   |   |   |   |   |   |   |   |   |   |   |   |   |   |   |   |   |   |   |   |   |   |   |   |   |   |   |   |   |   |   |   |   |   |   |   |   |   |   |   |   |   |   |   |   |   |   |   |   |   |   |   |   |   |   |   |   |   |   |   |   |   |   |   |   |   |   |   |   |   |   |   |   |   |   |   |   |   |   |   |   |   |   |   |   |   |   |   |   |   |   |   |   |   |   |   |   |   |   |   |   |   |   |   |   |   |   |   |   |   |   |   |   |   |   |   |   |   |   |   |   |   |   |   |   |   |   |   |   |   |   |   |   |   |   |   |   |   |   |   |   |   |   |   |   |   |   |   |   |   |   |   |   |   |   |   |   |   |   |   |   |   |   |   |   |   |   |   |   |   |   |   |   |   |   |   |   |   |   |   |   |   |   |   |   |   |   |   |   |   |   |   |   |   |   |   |   |   |   |   |   |   |   |   |   |   |   |   |   |   |   |   |   |   |   |   |   |   |   |   |   |   |   |   |   |   |   |   |   |   |   |   |   |   |   |   |   |   |   |   |   |   |   |   |   |   |   |   |   |   |   |   |   |   |   |   |   |   |   |   |   |   |   |   |   |   |   |   |   |   |   |   |   |   |   |   |   |   |   |   |   |   |   |   |   |   |   |   |   |   |   |   |   |   |   |   |   |   |   |   |   |   |   |   |   |   |   |   |   |   |   |   |   |   |   |   |   |   |   |   |   |   |   |   |   |   |   |   |   |   |   |   |   |   |   |   |   |   |   |   |   |   |   |   |   |   |   |   |   |   |   |   |   |   |   |   |   |   |   |   |   |   |   |   |   |   |   |   |   |   |   |   |   |   |   |   |   |   |   |   |   |   |   |   |   |   |   |   |   |   |   |   |   |   |   |   |   |   |   |   |   |   |   |   |   |   |   |   |   |   |   |   |   |   |   |   |   |   |   |   |   |   |   |   |   |   |   |   |   |   |   |   |   |   |   |   |   |   |   |   |   |   |   |   |   |   |   |   |   |   |   |   |   |   |   |   |   |   |   |   |   |   |   |   |   |   |   |   |   |   |   |   |   |   |   |   |   |   |   |   |   |   |   |   |   |   |   |   |   |   |   |   |   |   |   |   |   |   |   |   |   |   |   |   |   |   |   |   |   |   |   |   |   |   |   |   |   |   |   |   |   |   |   |   |   |   |   |   |   |   |   |   |   |   |   |   |   |   |   |   |   |   |   |   |   |   |   |   |   |   |   |   |   |   |   |   |   |   |   |   |   |   |   |   |   |   |   |   |   |   |   |   |   |   |   |   |   |   |   |   |   |   |   |   |   |   |   |   |   |   |   |   |   |   |   |   |   |   |   |   |   |   |   |   |   |   |   |   |   |   |   |   |   |   |   |   |   |   |   |   |   |   |   |   |   |   |   |   |   |   |   |   |   |   |   |   |   |   |   |   |   |   |   |   |   |   |   |   |   |   |   |   |   |   |   |   |   |   |   |   |   |   |   |   |   |   |   |   |   |   |   |   |   |   |   |   |   |   |   |   |   |   |   |   |   |   |   |   |   |   |   |   |   |   |   |   |   |   |   |   |   |   |   |   |   |   |   |   |   |   |   |   |   |   |   |   |   |   |   |   |   |   |   |   |   |   |   |   |   |   |   |   |   |   |   |   |   |   |   |   |   |   |   |   |   |   |   |   |   |   |   |   |   |   |   |   |   |   |   |   |   |   |   |   |   |   |   |   |   |   |   |   |   |   |   |   |   |   |   |   |   |   |   |   |   |   |   |
|----------------------------|-----|-----|-----|-----|-----|-----|-----|-----|---|---|---|---|---|---|---|---|---|---|---|---|---|---|---|---|---|---|---|---|---|---|---|---|---|---|---|---|---|---|---|---|---|---|---|---|---|---|---|---|---|---|---|---|---|---|---|---|---|---|---|---|---|---|---|---|---|---|---|---|---|---|---|---|---|---|---|---|---|---|---|---|---|---|---|---|---|---|---|---|---|---|---|---|---|---|---|---|---|---|---|---|---|---|---|---|---|---|---|---|---|---|---|---|---|---|---|---|---|---|---|---|---|---|---|---|---|---|---|---|---|---|---|---|---|---|---|---|---|---|---|---|---|---|---|---|---|---|---|---|---|---|---|---|---|---|---|---|---|---|---|---|---|---|---|---|---|---|---|---|---|---|---|---|---|---|---|---|---|---|---|---|---|---|---|---|---|---|---|---|---|---|---|---|---|---|---|---|---|---|---|---|---|---|---|---|---|---|---|---|---|---|---|---|---|---|---|---|---|---|---|---|---|---|---|---|---|---|---|---|---|---|---|---|---|---|---|---|---|---|---|---|---|---|---|---|---|---|---|---|---|---|---|---|---|---|---|---|---|---|---|---|---|---|---|---|---|---|---|---|---|---|---|---|---|---|---|---|---|---|---|---|---|---|---|---|---|---|---|---|---|---|---|---|---|---|---|---|---|---|---|---|---|---|---|---|---|---|---|---|---|---|---|---|---|---|---|---|---|---|---|---|---|---|---|---|---|---|---|---|---|---|---|---|---|---|---|---|---|---|---|---|---|---|---|---|---|---|---|---|---|---|---|---|---|---|---|---|---|---|---|---|---|---|---|---|---|---|---|---|---|---|---|---|---|---|---|---|---|---|---|---|---|---|---|---|---|---|---|---|---|---|---|---|---|---|---|---|---|---|---|---|---|---|---|---|---|---|---|---|---|---|---|---|---|---|---|---|---|---|---|---|---|---|---|---|---|---|---|---|---|---|---|---|---|---|---|---|---|---|---|---|---|---|---|---|---|---|---|---|---|---|---|---|---|---|---|---|---|---|---|---|---|---|---|---|---|---|---|---|---|---|---|---|---|---|---|---|---|---|---|---|---|---|---|---|---|---|---|---|---|---|---|---|---|---|---|---|---|---|---|---|---|---|---|---|---|---|---|---|---|---|---|---|---|---|---|---|---|---|---|---|---|---|---|---|---|---|---|---|---|---|---|---|---|---|---|---|---|---|---|---|---|---|---|---|---|---|---|---|---|---|---|---|---|---|---|---|---|---|---|---|---|---|---|---|---|---|---|---|---|---|---|---|---|---|---|---|---|---|---|---|---|---|---|---|---|---|---|---|---|---|---|---|---|---|---|---|---|---|---|---|---|---|---|---|---|---|---|---|---|---|---|---|---|---|---|---|---|---|---|---|---|---|---|---|---|---|---|---|---|---|---|---|---|---|---|---|---|---|---|---|---|---|---|---|---|---|---|---|---|---|---|---|---|---|---|---|---|---|---|---|---|---|---|---|---|---|---|---|---|---|---|---|---|---|---|---|---|---|---|---|---|---|---|---|---|---|---|---|---|---|---|---|---|---|---|---|---|---|---|---|---|---|---|---|---|---|---|---|---|---|---|---|---|---|---|---|---|---|---|---|---|---|---|---|---|---|---|---|---|---|---|---|---|---|---|---|---|---|---|---|---|---|---|---|---|---|---|---|---|---|---|---|---|---|---|---|---|---|---|---|---|---|---|---|---|---|---|---|---|---|---|---|---|---|---|---|---|---|---|---|---|---|---|---|---|---|---|---|---|---|---|---|---|---|---|---|---|---|---|---|---|---|---|---|---|---|---|---|---|---|---|---|---|---|---|---|---|---|---|---|---|---|---|---|---|---|---|---|---|---|---|---|---|---|---|---|---|---|---|---|---|---|---|---|---|---|---|---|---|---|---|---|---|---|---|---|---|---|---|---|---|---|---|---|---|---|---|---|---|---|---|---|---|---|---|---|---|---|---|---|---|---|---|---|---|---|---|---|---|---|---|---|---|---|---|---|---|---|---|---|---|---|---|---|---|---|---|---|---|---|---|---|---|---|---|---|---|---|---|---|---|---|---|---|---|---|---|---|---|---|---|---|---|---|---|---|---|---|---|---|---|---|---|---|---|---|---|---|---|---|---|---|---|---|---|---|---|---|---|---|---|---|---|---|---|---|---|---|---|---|---|---|---|---|---|---|---|---|---|---|---|---|---|---|---|---|---|---|---|---|---|---|---|---|---|---|---|---|---|---|---|---|---|---|---|---|---|---|---|---|---|---|---|---|---|---|---|---|---|---|---|---|---|---|---|---|---|---|---|---|---|---|---|---|---|---|---|---|---|---|---|---|---|---|---|---|---|---|---|---|---|---|---|---|---|---|---|---|---|---|---|---|---|---|---|---|---|---|---|---|---|---|---|---|---|---|---|---|---|---|---|---|---|---|---|---|---|---|---|---|---|---|---|---|---|---|---|---|---|---|---|---|---|---|---|---|---|---|---|---|---|---|---|---|---|---|---|---|---|---|---|---|---|---|---|---|---|---|---|---|---|---|---|---|---|---|---|---|---|---|---|---|---|---|---|---|---|---|---|---|---|---|---|---|---|---|---|---|---|---|---|---|---|---|---|---|---|---|---|---|---|---|---|---|---|---|---|---|---|---|---|---|---|---|---|---|---|---|---|---|---|---|---|---|---|---|---|---|---|---|---|---|---|---|---|---|---|---|---|---|---|---|---|---|---|---|---|---|---|---|---|---|---|---|---|---|---|---|---|---|---|---|---|---|---|---|---|---|---|---|---|---|---|---|---|---|---|---|---|---|---|---|---|---|---|---|---|---|---|---|---|---|---|---|---|---|---|---|---|---|---|---|---|---|---|---|---|---|---|---|---|---|---|---|---|---|---|---|---|---|---|---|---|---|---|---|---|---|---|---|---|---|---|---|---|---|---|---|---|---|---|---|---|---|
| <i>Callorhinchus milii</i> | A   | G   | A   | C   | G   | A   | T   | C   | T | T | G | T | G | A | A | A | A | A | A | A | A | A | A | A | A | A | A | A | A | A | A | A | A | A | A | A | A | A | A | A | A | A | A | A | A | A | A | A | A | A | A | A | A | A | A | A | A | A | A | A | A | A | A | A | A | A | A | A | A | A | A | A | A | A | A | A | A | A | A | A | A | A | A | A | A | A | A | A | A | A | A | A | A | A | A | A | A | A | A | A | A | A | A | A | A | A | A | A | A | A | A | A | A | A | A | A | A | A | A | A | A | A | A | A | A | A | A | A | A | A | A | A | A | A | A | A | A | A | A | A | A | A | A | A | A | A | A | A | A | A | A | A | A | A | A | A | A | A | A | A | A | A | A | A | A | A | A | A | A | A | A | A | A | A | A | A | A | A | A | A | A | A | A | A | A | A | A | A | A | A | A | A | A | A | A | A | A | A | A | A | A | A | A | A | A | A | A | A | A | A | A | A | A | A | A | A | A | A | A | A | A | A | A | A | A | A | A | A | A | A | A | A | A | A | A | A | A | A | A | A | A | A | A | A | A | A | A | A | A | A | A | A | A | A | A | A | A | A | A | A | A | A | A | A | A | A | A | A | A | A | A | A | A | A | A | A | A | A | A | A | A | A | A | A | A | A | A | A | A | A | A | A | A | A | A | A | A | A | A | A | A | A | A | A | A | A | A | A | A | A | A | A | A | A | A | A | A | A | A | A | A | A | A | A | A | A | A | A | A | A | A | A | A | A | A | A | A | A | A | A | A | A | A | A | A | A | A | A | A | A | A | A | A | A | A | A | A | A | A | A | A | A | A | A | A | A | A | A | A | A | A | A | A | A | A | A | A | A | A | A | A | A | A | A | A | A | A | A | A | A | A | A | A | A | A | A | A | A | A | A | A | A | A | A | A | A | A | A | A | A | A | A | A | A | A | A | A | A | A | A | A | A | A | A | A | A | A | A | A | A | A | A | A | A | A | A | A | A | A | A | A | A | A | A | A | A | A | A | A | A | A | A | A | A | A | A | A | A | A | A | A | A | A | A | A | A | A | A | A | A | A | A | A | A | A | A | A | A | A | A | A | A | A | A | A | A | A | A | A | A | A | A | A | A | A | A | A | A | A | A | A | A | A | A | A | A | A | A | A | A | A | A | A | A | A | A | A | A | A | A | A | A | A | A | A | A | A | A | A | A | A | A | A | A | A | A | A | A | A | A | A | A | A | A | A | A | A | A | A | A | A | A | A | A | A | A | A | A | A | A | A | A | A | A | A | A | A | A | A | A | A | A | A | A | A | A | A | A | A | A | A | A | A | A | A | A | A | A | A | A | A | A | A | A | A | A | A | A | A | A | A | A | A | A | A | A | A | A | A | A | A | A | A | A | A | A | A | A | A | A | A | A | A | A | A | A | A | A | A | A | A | A | A | A | A | A | A | A | A | A | A | A | A | A | A | A | A | A | A | A | A | A | A | A | A | A | A | A | A | A | A | A | A | A | A | A | A | A | A | A | A | A | A | A | A | A | A | A | A | A | A | A | A | A | A | A | A | A | A | A | A | A | A | A | A | A | A | A | A | A | A | A | A | A | A | A | A | A | A | A | A | A | A | A | A | A | A | A | A | A | A | A | A | A | A | A | A | A | A | A | A | A | A | A | A | A | A | A | A | A | A | A | A | A | A | A | A | A | A | A | A | A | A | A | A | A | A | A | A | A | A | A | A | A | A | A | A | A | A | A | A | A | A | A | A | A | A | A | A | A | A | A | A | A | A | A | A | A | A | A | A | A | A | A | A | A | A | A | A | A | A | A | A | A | A | A | A | A | A | A | A | A | A | A | A | A | A | A | A | A | A | A | A | A | A | A | A | A | A | A | A | A | A | A | A | A | A | A | A | A | A | A | A | A | A | A | A | A | A | A | A | A | A | A | A | A | A | A | A | A | A | A | A | A | A | A | A | A | A | A | A | A | A | A | A | A | A | A | A | A | A | A | A | A | A | A | A | A | A | A | A | A | A | A | A | A | A | A | A | A | A | A | A | A | A | A | A | A | A | A | A | A | A | A | A | A | A | A | A | A | A | A | A | A | A | A | A | A | A | A | A | A | A | A | A | A | A | A | A | A | A | A | A | A | A | A | A | A | A | A | A | A | A | A | A | A | A | A | A | A | A | A | A | A | A | A | A | A | A | A | A | A | A | A | A | A | A | A | A | A | A | A | A | A | A | A | A | A | A | A | A | A | A | A | A | A | A | A | A | A | A | A | A | A | A | A | A | A | A | A | A | A | A | A | A | A | A | A | A | A | A | A | A | A | A | A | A | A | A | A | A | A | A | A | A | A | A | A | A | A | A | A | A | A | A | A | A | A | A | A | A | A | A | A | A | A | A | A | A | A | A | A | A | A | A | A | A | A | A | A | A | A | A | A | A | A | A | A | A | A | A | A | A | A | A | A | A | A | A | A | A | A | A | A | A | A | A | A | A | A | A | A | A | A | A | A | A | A | A | A | A | A | A | A | A | A | A | A | A | A | A | A | A | A | A | A | A | A | A | A | A | A | A | A | A | A | A | A | A | A | A | A | A | A | A | A | A | A | A | A | A | A | A | A | A | A | A | A | A | A | A | A | A | A | A | A | A | A | A | A | A | A | A | A | A | A | A | A | A | A | A | A | A | A | A | A | A | A | A | A | A | A | A | A | A | A | A | A | A | A | A | A | A | A | A | A | A | A | A | A | A | A | A | A | A | A | A | A | A | A | A | A | A | A | A | A | A | A | A | A | A | A | A | A | A | A | A | A | A | A | A | A | A | A | A | A | A | A | A | A | A | A | A | A | A | A | A | A | A | A | A | A | A | A | A | A | A | A | A | A | A | A | A | A | A | A | A | A | A | A | A | A | A | A | A | A | A | A | A | A | A | A | A | A | A | A | A | A | A | A | A | A | A | A | A | A | A | A | A | A | A | A | A | A |

| conservation                         | 740      | 750      | 760    | 770     | 780       | 790             | 800      | 810       |              |              |              |              |              |         |        |     |
|--------------------------------------|----------|----------|--------|---------|-----------|-----------------|----------|-----------|--------------|--------------|--------------|--------------|--------------|---------|--------|-----|
| <i>Callorhinchus milii</i>           | CAAAAC   | TGATGG   | AAACT  | TTTGGAT | CAGAACAT  | ATCAGCCGGGACT   | GGAAGGC  | CTG       | CCTGCTCATT   | TACTGGGTGAC  | ATGTGG       | 816          |              |         |        |     |
| <i>Alligator mississippiensis</i>    | ACAAGT   | TGGAAC   | AGGTC  | TATGGCT | CAGATCGC  | ATCAGCAAAACAGGA | TGTCTT   | CCTGCC    | CATT         | TACTTTGGTGAC | ATGTGG       | 807          |              |         |        |     |
| <i>Anolis carolinensis</i>           | ACAATT   | TATGGA   | AGGTC  | TATGGCT | CAACGAAC  | ATTGACC         | CAACGGAT | TGTCTT    | CCTGCTCATT   | TACTTTGGTGAC | ATGTGG       | 840          |              |         |        |     |
| <i>Astyanax mexicanus</i>            | CCAAAC   | TGCAGAA  | TACC   | TAT     | CTTGGTCAT | ATTGCTT         | CTAAT    | GGAAGGC   | CTTCCAGCT    | CATT         | TACTTTGGTGAT | ATGTGG       | 810          |         |        |     |
| <i>Boleophthalmus pectinirostris</i> | CCAAAC   | TGATGG   | ACGTC  | TAC     | CCCGGACAC | ATCCACC         | CTCATAG  | CCCT      | CTGCCCGCC    | CATCTGCT     | CGGTGAC      | ATGTGG       | 822          |         |        |     |
| <i>Cynoglossus semilaevis</i>        | CCAGTC   | TGATGA   | AGGTC  | TAC     | CCGGGCCAC | ATTGATCT        | GAAA     | GGA       | CCCCTGCCAGCT | CACCTGCT     | TGGCGAC      | ATGTGG       | 813          |         |        |     |
| <i>Danio rerio</i>                   | CAAAAC   | TGCAAG   | ACGTC  | TAT     | CTTGGTCAC | ATTGGCT         | CTGAT    | CCGTGCTT  | CTCCAGCA     | CATT         | TGCTTTGGTGAT | ATGTGG       | 810          |         |        |     |
| <i>Esox lucius</i>                   | CTAAGCTT | CAGGCTAA | ACAT   | CTT     | GAGCAC    | ATTCACC         | CGGAGGA  | GCGCTG    | CCCTGCC      | CATCTGCT     | TGGCGAC      | ATGTGG       | 819          |         |        |     |
| <i>Fundulus heteroclitus</i>         | CCAAGCTT | TATGGA   | AGGTC  | TAC     | CCAGGACAC | ATTGAAT         | CAGAT    | GGA       | CCACTG       | CCTGCC       | CACCTTCT     | TTGGTGAC     | ATGTGG       | 825     |        |     |
| <i>Gekko japonicus</i>               | GTAAATCT | CCAGAAA  | ATA    | TAT     | TGGCTCAC  | ATGACT          | CAAAA    | GGAT      | TGTCTT       | CCTGCT       | CATT         | TGCTTTGGTGAC | ATGTGG       | 813     |        |     |
| <i>Haplochromis burtoni</i>          | CCAAGCTT | TATGGA   | AGGTC  | TAT     | CCAGGGCAT | ATTGATT         | CAGAT    | GGA       | TTCTCC       | CAGCC        | CACCTGCT     | TGGTGAC      | ATGTGG       | 819     |        |     |
| <i>Hippocampus comes</i>             | CTAAGCTT | GATGA    | AAGTAC | CTA     | AAAGGGCAT | ATTGATGA        | CAAGG    | AGCTCTG   | CCAGCG       | CATCTCTT     | TGGCGAC      | ATGTGG       | 819          |         |        |     |
| <i>Ictalurus punctatus</i>           | CCAAAT   | TGCAGG   | ACGCC  | TAT     | CTTGGCCAC | ATCGTCT         | CTAAC    | GGAGGT    | CTTCCAGCC    | CATT         | TGCTTTGGTGAT | ATGTGG       | 810          |         |        |     |
| <i>Larimichthys crocea</i>           | CCAAGCT  | CATGGA   | AGGTC  | TAC     | AAAGAAGGC | ATTGATT         | CAGAA    | GGA       | CCTG         | CCAGCC       | CACCTGCT     | TGGTGAC      | ATGTGG       | 819     |        |     |
| <i>Lates calcarifer</i>              | CCAGGC   | TTATGGA  | AGGTC  | TAC     | CCAGGACAT | ATTGATT         | CACA     | AGGACCT   | CTTCCAGCC    | CACCTGCT     | TGGTGAC      | ATGTGG       | 819          |         |        |     |
| <i>Latimeria chalumnae</i>           | CAAAAGCT | TGATGA   | GAAG   | TAC     | CGGCC     | CCAACAT         | ATTAACCT | GATGGGGGT | CTT          | CCTGCT       | CATT         | TACTTTGGTGAC | ATGTGG       | 951     |        |     |
| <i>Lepisosteus oculatus</i>          | ATAAAC   | TACGTGA  | AAGTAT | CTA     | CCAGGACAC | ATCAGCC         | CAAAT    | GGTGGT    | CTTCCAGCT    | CATT         | TACTGGGTGAT  | ATGTGG       | 810          |         |        |     |
| <i>Macaca fascicularis</i>           | CAAAGT   | TGATGA   | ATGCC  | TAC     | CTTCTCTAT | AT              | TAGTC    | CAACT     | GGATGC       | CTT          | CCTGCT       | CATT         | TGCTTTGGTGAT | ATGTGG  | 813    |     |
| <i>Manacus vitellinus</i>            | ACCACC   | TGGAGCG  | AGTG   | TAC     | GGCC      | CAAGCTC         | ATCAGCT  | CACAG     | GATGC        | CT           | CCCTGCT      | CAC          | TGCTTTGGTGAT | ATGTGG  | 819    |     |
| <i>Mus musculus</i>                  | GGAAAGT  | TGATGG   | ATACC  | TAC     | CTTCTCTAC | ATCAGCC         | CACT     | GGA       | TGCCT        | CCCTGCC      | CATT         | TGCTTTGGTGAT | ATGTGG       | 813     |        |     |
| <i>Neolamprologus brichardi</i>      | CCAAGCTT | TATGGA   | AGGTC  | TAT     | CCAGGGCAT | ATTGATT         | CAGAT    | GGA       | TTCTCC       | CAGCC        | CACCTGCT     | TGGTGAC      | ATGTGG       | 819     |        |     |
| <i>Oncorhynchus mykiss</i>           | CTAAGCT  | TGCAGG   | CCAAAC | CTT     | GAAACAC   | ATCCACC         | CAGAG    | GGGGGC    | CTA          | CC           | TGCC         | CATCTA       | CTG          | GGGTGAC | ATGTGG | 822 |
| <i>Oreochromis niloticus</i>         | CCAAGCTT | TATGGA   | AGGTC  | TAT     | CCAGGGCAT | ATTGATT         | CAGAT    | GGA       | TTCTCC       | CAGCC        | CACCTGCT     | CGGTGAC      | ATGTGG       | 819     |        |     |
| <i>Poecilia formosa</i>              | CCAGGC   | TTATGGA  | AGGTC  | TAC     | CCAGGATAC | ATTGACT         | CACAG    | GGA       | CCCCTG       | CCCGCC       | CACTCCT      | TTGGTGAC     | ATGTGG       | 822     |        |     |
| <i>Poecilia latipinna</i>            | CCAGGC   | TTATGGA  | AGGTC  | TAC     | CCAGGATAC | ATTGACT         | CACAG    | GGA       | CCCCTG       | CCCGCC       | CACTCCT      | TTGGTGAC     | ATGTGG       | 822     |        |     |
| <i>Pseudopodoces humilis</i>         | ACAAGCT  | TGGGGC   | AAGTG  | TAT     | TGGCC     | CTGAGCTC        | ATCAGCA  | CACAG     | GAGGC        | CT           | CCCTGCT      | CAC          | TGCTGGGTGAT  | ATGTGG  | 813    |     |
| <i>Pundamilia nyererei</i>           | CCAAGCTT | TATGGA   | AGGTC  | TAT     | CCAGGGCAT | ATTGATT         | CAGAT    | GGA       | TTCTCC       | CAGCC        | CACCTGCT     | TGGTGAC      | ATGTGG       | 819     |        |     |
| <i>Pygocentrus nattereri</i>         | CCAAAC   | TACAGGA  | AAACC  | TAC     | CTTGGGCAC | ATCGCTT         | CTAAT    | GGA       | GGCCTT       | CCAGCC       | CATT         | TACTAGGTGAC  | ATGTGG       | 810     |        |     |
| <i>Python bivittatus</i>             | GCCATCT  | TGTACA   | AAACGT | TAT     | TGGCC     | CAGGCTC         | ATTAACC  | CAAA      | GGATCT       | CTT          | CCTGCT       | CATT         | TACTTTGGTGAC | ATGTGG  | 804    |     |
| <i>Rattus norvegicus</i>             | CGAAAGT  | TGATGA   | AAGTG  | TAC     | CTTCTCTAC | ATCAGCC         | CACT     | GGATGC    | CT           | CCCTGCT      | CATT         | TGCTTTGGTGAT | ATGTGG       | 813     |        |     |
| <i>Scleropages formosus</i>          | GCAAACTT | CAAGA    | AGACT  | TAC     | CTTGACAC  | ATAAGTG         | CAACA    | GGA       | AGTCTT       | CCTGCA       | CATCTGCT     | TGGTGAT      | ATGTGG       | 819     |        |     |
| <i>Sinocyclocheilus anshuiensis</i>  | CAAAAC   | TGCAAG   | ATGTC  | TAT     | CTTGGTCAC | ATCGCCT         | CTGAC    | GCTTGC    | CTTCCAGTA    | CACCTGCT     | TTGGTGAT     | ATGTGG       | 810          |         |        |     |
| <i>Xenopus tropicalis</i>            | GAAATCT  | TGCAGCA  | AAGTC  | TAT     | TGGTT     | CTCGGTAC        | ATCAGT   | GA        | CTCTGGAT     | GCCTT        | CCTGCT       | CATT         | TGCTTTGGTGAT | ATGTGG  | 819    |     |
| <i>Lipotes vexillifer</i>            | CAAAAGT  | TGATGA   | ATGCC  | TAC     | CTTCCCGT  | ATCAGTC         | CACT     | GGA       | TGCCT        | CCCTGCC      | CATT         | TGCTTTGGTGAT | ATGTGG       | 810     |        |     |
| <i>Orcinus orca</i>                  | CAAAAGT  | TGATGA   | ATGCC  | TAC     | CTTCCCGT  | ATCAGTC         | CACT     | GGA       | TGCCT        | CCCTGCC      | CATT         | TGCTTTGGTGAT | ATGTGG       | 810     |        |     |
| <i>Homo sapiens</i>                  | CAAAAGT  | TGATGA   | ATGCC  | TAT     | CTTCTCTAT | ATCAGTC         | CAATT    | GGA       | TGCCT        | CCCTGCT      | CATT         | TGCTTTGGTGAT | ATGTGG       | 813     |        |     |

| conservation                         | 820        | 830           | 840              | 850             | 860           | 870            | 880       | 890      |      |
|--------------------------------------|------------|---------------|------------------|-----------------|---------------|----------------|-----------|----------|------|
| <i>Callorhinchus milii</i>           | GGAAAGGTTT | TGGGCAAAACCT  | TGTATCCTTGGTCAAT | TTCCGTATCCGT    | CAGAGGAAGACAT | CGATGTGACACAAG | CAATGGT   |          | 896  |
| <i>Alligator mississippiensis</i>    | GGGAGATTCT | TGGACAAATTT   | TGTATCCCTTGACAGT | TTCCCTATCCAGAC  | AAACAAACATT   | GATGTAACTAATA  | CAATGGT   |          | 887  |
| <i>Anolis carolinensis</i>           | GGAAGGTTT  | TGGACAAATTT   | TATACCATTAATGA   | TTCCCTATCCAGCT  | AAACAAATATT   | GATGTCTCTTCTG  | CAATGGT   |          | 920  |
| <i>Astyanax mexicanus</i>            | GGAAGGTTCT | TGGACCAACCTTT | TACCACCTAGCTGT   | TTCCCTATCTGACA  | AGCCTGATATCG  | ACGTGAGCCCTG   | CAATGGT   |          | 890  |
| <i>Boleophthalmus pectinirostris</i> | GGACGATTCT | TGGACCAACCT   | TGTATCCTCTGTCCA  | TCCCTTCCCGAC    | AGACAGATATCG  | ACGTGAGCAAAA   | CCATGGT   |          | 902  |
| <i>Cynoglossus semilaevis</i>        | GGGCGATTCT | TGGACAAACCT   | TGTACCGTCACAGTA  | TTCCATATCCAGAAA | AAACAGATATT   | GATGTGAGCAACA  | CCATGGT   |          | 893  |
| <i>Danio rerio</i>                   | GGACGGTTTT | TGGACCAACTT   | TGTATCCTCTCATGAT | TTCCCATATCCAGAC | AGGCCTGATATT  | GATGTGAGCTCCG  | CAATGGT   |          | 890  |
| <i>Esox lucius</i>                   | GGAAGGTTT  | TGGACAGGGCT   | TGTACCTATCTCAACC | CCCTTCCAGAGAAA  | ACGGACATT     | GATGTGACCAGTG  | CTATGAT   |          | 899  |
| <i>Fundulus heteroclitus</i>         | GGAAGATTCT | TGGACCAACCT   | TGTATCCTCTGTGCA  | TTCCCTTACCTG    | ACAAACAGACATT | GATGTGACGAGCA  | CCATGGT   |          | 905  |
| <i>Gekko japonicus</i>               | GGTAGATTTT | TGGACAAATTT   | TATATCCTTTAATGA  | TTCCCTATCCAAAT  | AAACAAATATT   | GATGTGTCTTCTG  | CAATGGT   |          | 893  |
| <i>Haplochromis burtoni</i>          | GGAAGATTCT | TGGACCAACCTTT | TATTCTCTAACAGT   | GGCCATCTCTG     | ACAAACAGATAT  | CGATGTGAGTCAGT | CTATGGT   |          | 899  |
| <i>Hippocampus comes</i>             | GGAAGATTCT | TGGACTA       | ACTTGTCAATG      | CCCTTACAGGGT    | .....         | GAGATTGATGT    | GACCAAAAC | CAATGGT  | 893  |
| <i>Ictalurus punctatus</i>           | GGAAGGTTT  | TGGACCAACCTTT | TACTCACCTCTGTG   | TCCCTTATCAAG    | ACAAAGCCTG    | ATCGACGTG      | ACCTCTG   | CGATGAT  | 890  |
| <i>Larimichthys crocea</i>           | GGAAGATTCT | TGGACTAACCT   | TGTACCTCTATCAAT  | TTCCCTACCCGG    | AAAAAAGATATT  | GATGTGACCGAT   | GAAATGGT  |          | 899  |
| <i>Lates calcarifer</i>              | GGAAGATTCT | TGGACCAACCT   | TGTACCTCTGTCTG   | TCCCTACCTG      | AAAAACAGATATT | GATGTGACCAAAA  | CTATGGT   |          | 899  |
| <i>Latimeria chalumnae</i>           | GGAAGATTTT | TGGACAAACT    | TGTACCCCTTGGCTG  | TCCATACCCAC     | ATAAGA        | CAAGCATAGAT    | TGACAAAAC | CTATGGT  | 1031 |
| <i>Lepisosteus oculatus</i>          | GGCCGATTTT | TGGACAAACCT   | TATACCTTTATCAAT  | TCCCTATA        | AAAAACAAAGAGG | ATATTGATGT     | GACATCTG  | CCATGGT  | 890  |
| <i>Macaca fascicularis</i>           | GGTAGATTTT | TGGACAAATCT   | GTACTCTTGACAGT   | TTCCCTTTTGGAC   | AGAAAC        | AAACATAGAT     | GTTACTGAT | GCAATGGT | 893  |
| <i>Manacus vitellinus</i>            | GGTAGGTTT  | TGGACAAATCT   | TGTATGCTTGACTGT  | TTCCCTATCCAGCC  | AAACCAACATT   | GACGTAACTGAT   | GCAATGGT  |          | 899  |
| <i>Mus musculus</i>                  | GGTAGATTTT | TGGACAAATCT   | TGTACCTTTGACTGT  | TTCCCTTTTGAC    | AGAAAC        | CAACATAGAT     | GTTACTGAT | GCAATGAT | 893  |
| <i>Neolamprologus brichardi</i>      | GGAAGATTCT | TGGACCAACCTTT | TATTCTCTAACAGT   | GGCCATCTCTG     | ACAAACCGGAT   | ATCGATGTG      | AGTCAGT   | CTATGGT  | 899  |
| <i>Oncorhynchus mykiss</i>           | GGAAGGTTT  | TGGACAGGCTTT  | TACCCCATCTCAACC  | TCCCTTTCCAG     | AGAAAACCG     | ATTGATGTG      | ACGGAAGC  | TATGAT   | 902  |
| <i>Oreochromis niloticus</i>         | GGAAGATTCT | TGGACCAACCTTT | TATTCTCTATCAGT   | GGCCATCTG       | ACAAACCGGAT   | ATCGATGTG      | AGCCAGT   | CTATGGT  | 899  |
| <i>Poecilia formosa</i>              | GGAAGATTCT | TGGACCAACCT   | TGTATCCTCTGTGCA  | TCCCTACCCG      | ACAAACAGACATT | GACGTGACCAACA  | CTATGGT   |          | 902  |
| <i>Poecilia latipinna</i>            | GGAAGATTCT | TGGACCAACCT   | TGTATCCTCTGTGCA  | TCCCTACCTG      | ACAAACAGACAT  | CGACGTGACCAACA | CTATGGT   |          | 902  |
| <i>Pseudopodoces humilis</i>         | GGTAGATTCT | TGGACAAATCT   | CTATGCTTGACTGT   | TTCCCTATCCAGCC  | AAACCAACATT   | GATGTAACTTCTG  | CAATGGT   |          | 893  |
| <i>Pundamilia nyererei</i>           | GGAAGATTCT | TGGACCAACCTTT | TATTCTCTAACAGT   | GGCCATCTCTG     | ACAAACAGATAT  | CGATGTGAGTCAGT | CTATGGT   |          | 899  |
| <i>Pygocentrus nattereri</i>         | GGAAGGTTT  | TGGACCAACCTTT | TACTCATTATCTGT   | TCCCTTATCCAG    | ACAAAGCCTG    | ATTTGACGTG     | AGCTCAGT  | CAATGGT  | 890  |
| <i>Python bivittatus</i>             | GGTAGATTTT | TGGACAAATTT   | TATATCCTTTAATGG  | TGCCCTATCCAA    | ATAAACCAACATT | GACGTAACTCTG   | CAATGGT   |          | 884  |
| <i>Rattus norvegicus</i>             | GGTAGGTTT  | TGGACAAATCT   | TGTACCTTTGACTACT | CGCTTTCTTC      | AGAAACCAACAT  | AGATGTTACTGAT  | GCAATGGT  |          | 893  |
| <i>Scleropages formosus</i>          | GGAAGGTTCT | TGGACCAACCT   | TGTACCGCTATCCA   | TCCCTACCCCA     | ACAAAGAAG     | ACATTGATGT     | AACTGCTG  | CTATGAT  | 899  |
| <i>Sinocyclocheilus anshuiensis</i>  | GGAAGGTTT  | TGGACCAACTT   | TGTATCCTCTCATGAT | TTCCGTATCCAG    | AAAAGCCTGAT   | ATCGATGTG      | AGCTCTG   | AAATGGT  | 890  |
| <i>Xenopus tropicalis</i>            | GGAAGATTTT | TGGACAAATTT   | TGTATCCTCTGTAGT  | TCCCTTAC        | CAAAACAAAGAAG | CAATTGATGT     | GATGCTCCT | CAATGGT  | 899  |
| <i>Lipotes vexillifer</i>            | GGGAGATTTT | TGGACAAATCT   | TGTACCTTTGACAGT  | TCCCTTTTGAG     | AGAGACC       | CAAGCATAGAT    | GTTACCAA  | GAAATGCA | 890  |
| <i>Orcinus orca</i>                  | GGGAGATTTT | TGGACAAATCT   | TGTACCTTTGACAGT  | TCCCTTTTGAG     | AGAGACC       | CGAGCATAGAT    | GTTACCAA  | GAAATGCA | 890  |
| <i>Homo sapiens</i>                  | GGTAGATTTT | TGGACAAATCT   | TGTACTCTTTGACAGT | TTCCCTTTTGAC    | AGAAAC        | CAACATAGAT     | GTTACTGAT | GCAATGGT | 893  |

|              |                                                                                                                                                                                                                                                                                                                                                                                                                                                                                                                                                                                                                                                                                                                                                                                                                                                                                                                                                                                                                                                                                                                                                                                                                                                                                                                                                                                                                                                                                                                                                                                                                                                                                                                                                                                                                                                                                                                                                                                                                                                                                                                                                                                                                                                                                                                                                                                                                                                                                                                                                                                                                                                                                                                                                                                                                                                                                                                                                                                                                                                                                                                                                                                                                                                                                                                                                                                                                                                                                                                                                                                                                                                                                                                                                                                                                                                                                                                                                                                                                                                                                                                                                                                                                                                                                                                                                                                                                                                                                                                                                                                                                                                                                                                                                                                                                                                                                                                                                                                                                                                                                                                                                                                                                                                                                                                                                                                                                                                                                                                                                                                                                                                                                                                                                                                                                                                                                                                                                                                                                                                                                                                                                                                                                                                                                                                                                                                                                                                                                                                                                                                                                                                                                                                                                                                                                                                                                                                                                                                                                                                                                                                                                                                                                                                                                                                                                                                                                                                                                                                                                                                                                                                                                                                                                                                                                                                                                                                                                                                                                                                                                                                                                                                                                                                                                                                                                                                                                                                                                                                                                                                                                                                                                                                                                                                                                                                                                                                                                                                                                                                                                                                                                                                                                                                                                                                                                                                                                                                                                                                                                                                                                                                                                                                                                                                                                                                                                                                                                                                                                                                                                                                                                                                                                                                                                                                                                                                                                                                                                                                                                                                                                                                                                                                                                                                                                                                                                                                                                                                                                                                                                                                                                                                                                                                                                                                                                                                                                                                                                                                                                                                                                                                                                                                                                                                                                                                                                                                                                                                                                                                                                                                                                                                                                                                                                                                                                                                                                                                                                                                                                                                                                                                                                                                                                                                                                                                                                     |
|--------------|-------------------------------------------------------------------------------------------------------------------------------------------------------------------------------------------------------------------------------------------------------------------------------------------------------------------------------------------------------------------------------------------------------------------------------------------------------------------------------------------------------------------------------------------------------------------------------------------------------------------------------------------------------------------------------------------------------------------------------------------------------------------------------------------------------------------------------------------------------------------------------------------------------------------------------------------------------------------------------------------------------------------------------------------------------------------------------------------------------------------------------------------------------------------------------------------------------------------------------------------------------------------------------------------------------------------------------------------------------------------------------------------------------------------------------------------------------------------------------------------------------------------------------------------------------------------------------------------------------------------------------------------------------------------------------------------------------------------------------------------------------------------------------------------------------------------------------------------------------------------------------------------------------------------------------------------------------------------------------------------------------------------------------------------------------------------------------------------------------------------------------------------------------------------------------------------------------------------------------------------------------------------------------------------------------------------------------------------------------------------------------------------------------------------------------------------------------------------------------------------------------------------------------------------------------------------------------------------------------------------------------------------------------------------------------------------------------------------------------------------------------------------------------------------------------------------------------------------------------------------------------------------------------------------------------------------------------------------------------------------------------------------------------------------------------------------------------------------------------------------------------------------------------------------------------------------------------------------------------------------------------------------------------------------------------------------------------------------------------------------------------------------------------------------------------------------------------------------------------------------------------------------------------------------------------------------------------------------------------------------------------------------------------------------------------------------------------------------------------------------------------------------------------------------------------------------------------------------------------------------------------------------------------------------------------------------------------------------------------------------------------------------------------------------------------------------------------------------------------------------------------------------------------------------------------------------------------------------------------------------------------------------------------------------------------------------------------------------------------------------------------------------------------------------------------------------------------------------------------------------------------------------------------------------------------------------------------------------------------------------------------------------------------------------------------------------------------------------------------------------------------------------------------------------------------------------------------------------------------------------------------------------------------------------------------------------------------------------------------------------------------------------------------------------------------------------------------------------------------------------------------------------------------------------------------------------------------------------------------------------------------------------------------------------------------------------------------------------------------------------------------------------------------------------------------------------------------------------------------------------------------------------------------------------------------------------------------------------------------------------------------------------------------------------------------------------------------------------------------------------------------------------------------------------------------------------------------------------------------------------------------------------------------------------------------------------------------------------------------------------------------------------------------------------------------------------------------------------------------------------------------------------------------------------------------------------------------------------------------------------------------------------------------------------------------------------------------------------------------------------------------------------------------------------------------------------------------------------------------------------------------------------------------------------------------------------------------------------------------------------------------------------------------------------------------------------------------------------------------------------------------------------------------------------------------------------------------------------------------------------------------------------------------------------------------------------------------------------------------------------------------------------------------------------------------------------------------------------------------------------------------------------------------------------------------------------------------------------------------------------------------------------------------------------------------------------------------------------------------------------------------------------------------------------------------------------------------------------------------------------------------------------------------------------------------------------------------------------------------------------------------------------------------------------------------------------------------------------------------------------------------------------------------------------------------------------------------------------------------------------------------------------------------------------------------------------------------------------------------------------------------------------------------------------------------------------------------------------------------------------------------------------------------------------------------------------------------------------------------------------------------------------------------------------------------------------------------------------------------------------------------------------------------------------------------------------------------------------------------------------------------------------------------------------------------------------------------------------------------------------------------------------------------------------------------------------------------------------------------------------------------------------------------------------------------------------------------------------------------------------------------------------------------------------------------------------------------------------------------------------------------------------------------------------------------------------------------------------------------------------------------------------------------------------------------------------------------------------------------------------------------------------------------------------------------------------------------------------------------------------------------------------------------------------------------------------------------------------------------------------------------------------------------------------------------------------------------------------------------------------------------------------------------------------------------------------------------------------------------------------------------------------------------------------------------------------------------------------------------------------------------------------------------------------------------------------------------------------------------------------------------------------------------------------------------------------------------------------------------------------------------------------------------------------------------------------------------------------------------------------------------------------------------------------------------------------------------------------------------------------------------------------------------------------------------------------------------------------------------------------------------------------------------------------------------------------------------------------------------------------------------------------------------------------------------------------------------------------------------------------------------------------------------------------------------------------------------------------------------------------------------------------------------------------------------------------------------------------------------------------------------------------------------------------------------------------------------------------------------------------------------------------------------------------------------------------------------------------------------------------------------------------------------------------------------------------------------------------------------------------------------------------------------------------------------------------------------------------------------------------------------------------------------------------------------------------------------------------------------------------------------------------------------------------------------------------------------------------------------------------------------------------------------------------------------------------------------------------------------------------------------------------------------------------------------------------------------------------------------------------------------------------------------------------------------------------------------------------------------------------------------------------------------------------------------------------------------------------------------------------------------------------------------------------------------------------------------------------------------------------------------------------------------------------------------------------------------------------------------------------------------------------------------------------------------------------------------------------------------------------------------------------------------------------------------------------------------------------------------------------------------------------------------------------------------------------------------------------------------------------------------------|
| conservation | ●●●●●●●●●●●●●●●●●●●●●●●●●●●●●●●●●●●●●●●●●●●●●●●●●●●●●●●●●●●●●●●●●●●●●●●●●●●●●●●●●●●●●●●●●●●●●●●●●●●●●●●●●●●●●●●●●●●●●●●●●●●●●●●●●●●●●●●●●●●●●●●●●●●●●●●●●●●●●●●●●●●●●●●●●●●●●●●●●●●●●●●●●●●●●●●●●●●●●●●●●●●●●●●●●●●●●●●●●●●●●●●●●●●●●●●●●●●●●●●●●●●●●●●●●●●●●●●●●●●●●●●●●●●●●●●●●●●●●●●●●●●●●●●●●●●●●●●●●●●●●●●●●●●●●●●●●●●●●●●●●●●●●●●●●●●●●●●●●●●●●●●●●●●●●●●●●●●●●●●●●●●●●●●●●●●●●●●●●●●●●●●●●●●●●●●●●●●●●●●●●●●●●●●●●●●●●●●●●●●●●●●●●●●●●●●●●●●●●●●●●●●●●●●●●●●●●●●●●●●●●●●●●●●●●●●●●●●●●●●●●●●●●●●●●●●●●●●●●●●●●●●●●●●●●●●●●●●●●●●●●●●●●●●●●●●●●●●●●●●●●●●●●●●●●●●●●●●●●●●●●●●●●●●●●●●●●●●●●●●●●●●●●●●●●●●●●●●●●●●●●●●●●●●●●●●●●●●●●●●●●●●●●●●●●●●●●●●●●●●●●●●●●●●●●●●●●●●●●●●●●●●●●●●●●●●●●●●●●●●●●●●●●●●●●●●●●●●●●●●●●●●●●●●●●●●●●●●●●●●●●●●●●●●●●●●●●●●●●●●●●●●●●●●●●●●●●●●●●●●●●●●●●●●●●●●●●●●●●●●●●●●●●●●●●●●●●●●●●●●●●●●●●●●●●●●●●●●●●●●●●●●●●●●●●●●●●●●●●●●●●●●●●●●●●●●●●●●●●●●●●●●●●●●●●●●●●●●●●●●●●●●●●●●●●●●●●●●●●●●●●●●●●●●●●●●●●●●●●●●●●●●●●●●●●●●●●●●●●●●●●●●●●●●●●●●●●●●●●●●●●●●●●●●●●●●●●●●●●●●●●●●●●●●●●●●●●●●●●●●●●●●●●●●●●●●●●●●●●●●●●●●●●●●●●●●●●●●●●●●●●●●●●●●●●●●●●●●●●●●●●●●●●●●●●●●●●●●●●●●●●●●●●●●●●●●●●●●●●●●●●●●●●●●●●●●●●●●●●●●●●●●●●●●●●●●●●●●●●●●●●●●●●●●●●●●●●●●●●●●●●●●●●●●●●●●●●●●●●●●●●●●●●●●●●●●●●●●●●●●●●●●●●●●●●●●●●●●●●●●●●●●●●●●●●●●●●●●●●●●●●●●●●●●●●●●●●●●●●●●●●●●●●●●●●●●●●●●●●●●●●●●●●●●●●●●●●●●●●●●●●●●●●●●●●●●●●●●●●●●●●●●●●●●●●●●●●●●●●●●●●●●●●●●●●●●●●●●●●●●●●●●●●●●●●●●●●●●●●●●●●●●●●●●●●●●●●●●●●●●●●●●●●●●●●●●●●●●●●●●●●●●●●●●●●●●●●●●●●●●●●●●●●●●●●●●●●●●●●●●●●●●●●●●●●●●●●●●●●●●●●●●●●●●●●●●●●●●●●●●●●●●●●●●●●●●●●●●●●●●●●●●●●●●●●●●●●●●●●●●●●●●●●●●●●●●●●●●●●●●●●●●●●●●●●●●●●●●●●●●●●●●●●●●●●●●●●●●●●●●●●●●●●●●●●●●●●●●●●●●●●●●●●●●●●●●●●●●●●●●●●●●●●●●●●●●●●●●●●●●●●●●●●●●●●●●●●●●●●●●●●●●●●●●●●●●●●●●●●●●●●●●●●●●●●●●●●●●●●●●●●●●●●●●●●●●●●●●●●●●●●●●●●●●●●●●●●●●●●●●●●●●●●●●●●●●●●●●●●●●●●●●●●●●●●●●●●●●●●●●●●●●●●●●●●●●●●●●●●●●●●●●●●●●●●●●●●●●●●●●●●●●●●●●●●●●●●●●●●●●●●●●●●●●●●●●●●●●●●●●●●●●●●●●●●●●●●●●●●●●●●●●●●●●●●●●●●●●●●●●●●●●●●●●●●●●●●●●●●●●●●●●●●●●●●●●●●●●●●●●●●●●●●●●●●●●●●●●●●●●●●●●●●●●●●●●●●●●●●●●●●●●●●●●●●●●●●●●●●●●●●●●●●●●●●●●●●●●●●●●●●●●●●●●●●●●●●●●●●●●●●●●●●●●●●●●●●●●●●●●●●●●●●●●●●●●●●●●●●●●●●●●●●●●●●●●●●●●●●●●●●●●●●●●●●●●●●●●●●●●●●●●●●●●●●●●●●●●●●●●●●●●●●●●●●●●●●●●●●●●●●●●●●●●●●●●●●●●●●●●●●●●●●●●●●●●●●●●●●●●●●●●●●●●●●●●●●●●●●●●●●●●●●●●●●●●●●●●●●●●●●●●●●●●●●●●●●●●●●●●●●●●●●●●●●●●●●●●●●●●●●●●●●●●●●●●●●●●●●●●●●●●●●●●●●●●●●●●●●●●●●●●●●●●●●●●●●●●●●●●●●●●●●●●●●●●●●●●●●●●●●●●●●●●●●●●●●●●●●●●●●●●●●●●●●●●●●●●●●●●●●●●●●●●●●●●●●●●●●●●●●●●●●●●●●●●●●●●●●●●●●●●●●●●●●●●●●●●●●●●●●●●●●●●●●●●●●●●●●●●●●●●●●●●●●●●●●●●●●●●●●●●●●●●●●●●●●●●●●●●●●●●●●●●●●●●●●●●●●●●●●●●●●●●●●●●●●●●●●●●●●●●●●●●●●●●●●●●●●●●●●●●●●●●●●●●●●●●●●●●●●●●●●●●●●●●●●●●●●●●●●●●●●●●●●●●●●●●●●●●●●●●●●●●●●●●●●●●●●●●●●●●●●●●●●●●●●●●●●●●●●●●●●●●●●●●●●●●●●●●●●●●●●●●●●●●●●●●●●●●●●●●●●●●●●●●●●●●●●●●●●●●●●●●●●●●●●●●●●●●●●●●●●●●●●●●●●●●●●●●●●●●●●●●●●●●●●●●●●●●●●●●●●●●●●●●●●●●●●●●●●●●●●●●●●●●●●●●●●●●●●●●●●●●●●●●●●●●●●●●●●●●●●●●●●●●●●●●●●●●●●●●●●●●●●●●●●●●●●●●●●●●●●●●●●●●●●●●●●●●●●●●●●●●●●●●●●●●●●●●●●●●●●●●●●●●●●●●●●●●●●●●●●●●●●●●●●●●●●●●●●●●●●●●●●●●●●●●●●●●●●●●●●●●●●●●●●●●●●●●●●●●●●●●●●●●●●●●●●●●●●●●●●●●●●●●●●●●●●●●●●●●●●●●●●●●●●●●●●●●●●●●●●●●●●●●●●●●●●●●●●●●●●●●●●●●●●●●●●●●●●●●●●●●●●●●●●●●●●●●●●●●●●●●●●●●●●●●●●●●●●●●●●●●●●●●●●●●●●●●●●●●●●●●●●●●●●●●●●●●●●●●●●●●●●●●●●●●●●●●●●●●●●●●●●●●●●●●●●●●●●●●●●●●●●●●●●●●●●●●●●●●●●●●●●●●●●●●●●●●●●●●●●●●●●●●●●●●●●●●●●●●●●●●●●●●●●●●●●●●●●●●●●●●●●●●●●●●●●●●●●●●●●●●●●●●●●●●●●●●●●●●●●●●●●●●●●●●●●●●●●●●●●●●●●●●●●●●●●●●●●●●●●●●●●●●●●●●●●●●●●●●●●●●●●●●●●●●●●●●●●●●●●●●●●●●●●●●●●●●●●●●●●●●●●●●●●●●●●●●●●●●●●●●●●●●●●●●●●●●●●●●●●●●●●●●●●●●●●●●●●●●●●●●●●●●●●●●●●●●●●●●●●●●●●●●●●●●●●●●●●●●●●●●●●●●●●●●●●●●●●●●●●●●●●●●●●●●●●●●●●●●●●●●●●●●●●●●●●●●●●●●●●●●●●●●●●●●●●●●●●●●●●●●●●●●●●●●●●●●●●●●●●●●●●●●●●●●●●●●●●●●●●●●●●●●●●●●●●●●●●●●●●●●●●●●●●●●●●●●●●●●●●●●●●●●●●●●●●●●●●●●●●●●●●●●●●●●●●●●●●●●●●●●●●●●●●●●●●●●●●●●●●●●●●●●●●●●●●●●●●●●●●●●●●●●●●●●●●●●●●●●●●●●●●●●●●●●●●●●●●●●●●●●●●●●●●●●●●●●●●●●●●●●●●●●●●●●●●●●●●●●●●●●●●●●●●●●●●●●●●●●●●●●●●●●●●●●●●●●●●●●●●●●●●●●●●●●●●●●●●●●●●●●●●●●●●●●●●●●●●●●●●●●●●●●●●●●●●●●●●●●●●●●●●●●●●●●●●●●●●●●●●●●●●●●●●●●●●●●●●●●●●●●●●●●●●●●●●●●●●●●●●●●●●●●●●●●●●●●●●●●●●●●●●●●●●●●●●●●●●●●●●●●●●●●●●●●●●●●●●●●●●●●●●●●●●●●●●●●●●●●●●●●●●●●●●●●●●●●●●●●●●●●●●●●●●●●●●●●●●●●●●●●●●●●●●●●●●●●●●●●●●●●●●●●●●●●●●●●●●●●●●●●●●●●●●●●●●●●●●●●●●●●●●●●●●●●●●●●●●●●●●●●●●●●●●●●●●●●●●●●●●●●●●●●●●●●●●●●●●●●●●●●●●●●●●●●●●●●●●●●●●●●●●●●●●●●●●●●●●●●●●●●●●●●●●●●●●●●●●●●●●●●●●●●●●●●●●●●●●●●●●●●●●●●●●●●●●●●●●●●●●●●●●●●●●●●●●●●●●●●●●●●●●●●●●●●●●●●●●●●●●●●●●●●●●●●●●●●●●●●●●●●●●●●●●●●●●●●●●●●●●●●●●●●●●●●●●●●●●●●●●●●●●●●●●●●●●●●●●●●●●●●●●●●●●●●●●●●●●●●●●●●●●●●●●●●●●●●●●●●●●●●●●●●●●●●●●●●●●●●●●●●●●●●●●●●●●●●●●●●●●●●●●●●●●●●●●●●●●●●●●●●●●●●●●●●●●●●●●●●●●●●●●●●●●●●●●●●●●●●●●●●●●●●●●●●●●●●●●●●●●●●●●●●●●●●●●●●●●●●●●●●●●●●●●●●●●●●●●●●●●●●●●●●●●●●●●●●●●●●●●●●●●●●●●●●●●●●●●●●●●●●●●●●●●●●●●●●●●●●●●●●●●●●●●●●●●●●●●●●●●●●●●●●●●●●●●●●●●●●●●●●●●●●●●●●●●●●●●●●●●●●●●●●●●●●●●●●●●●●●●●●●●●●●●●●●●●●●●●●●●●●●●●●●●●●●●●●●●●●●●●●●●●●●●●●●●●●●●●●●●●●●●●●●●●●●●●●●●●●●●●●●●●●●●●●●●●●●●●●●●●●●●●●●●●●●●●●●●●●●●●●●●●●●●●●●●●●●●●●●●●●●●●●●●●●●●●●●●●●●●●●●●●●●●●●●●●●●●●●●●●●●●●●●●●●●●●●●●●●●●●●●●●●●●●●●●●●●●●●●●●●●●●●●●●●●●●●●●●●●●●●●●●●●●●●●●●●●●●●●●●●●●●●●●●●●●●●●●●●●●●●●●●●●●●●●●●●●●●●●●●●●●●●●●●●●●●●●●●●●●●●●●●●●●●●●●●●●●●●●●●●●●●●●●●●●●●●●●●●●●●●●●●●●●●●●●●●●●●●●●●●●●●●●●●●●●●●●●●●●●●●●●●●●●●●●●●●●●●●●●●●●●●●●●●●●●●●●●●●●●●●●●●●●●●●●●●●●●●●●●●●●●●●●●●●●●●●●●●●●●●●●●●●●●●●●●●●●●●●●●●●●●●●●●●●●●●●●●●●●●●●●●●●●●●●●●●●●●●●●●●●●●●●●●●●●●●●●●●●●●●●●●●●●●●●●●●●●●●●●●●●●●●●●●●●●●●●●●●●●●●●●●●●●●●●●●●●●●●●●●●●●●●●●●●●●●●●●●●●●●●●●●●●●●●●●●●●●●●●●●●●●●●●●●●●●●●●●●●●●●●●●●●●●●●●●●●●●●●●●●●●●●●●●●●●●●●●●●●●●●●●●●●●●●●●●●●●●●●●●●●●●●●●●●●●●●●●●●●●●●●●●●●●●●●●●●●●●●●●●●●●●●●●●●●●●●●●●●●●●●●●●●●●●●●●●●●●●●●●●●●●●●●●●●●●●●●●●●●●●●●●●●●●●●●●●●●●●●●●●●●●●●●●●●●●●●●●●●●●●●●●●●●●●●●●●●●●●●●●●●●●●●●●●●●●●●●●●●●●●●●●●●●●●●●●●●●●●●●●●●●●●●●●●●●●●●●●●●●●●●●●●●●●●●●●●●●●●●●●●●●●●●●●●●●●●●●●●●●●●●●●●●●●●●●●●●●●●●●●●●●●●●●●●●●●●●●●●●●●●●●●●●●●●●●●●●●●●●●●●●●●●●●●●●●●●●●●●●●●●●●●●●●●●●●●●●●●●●●●●●●●●●●●●●●●●●●●●●●●●●●●●●●●●●●●●●●●●●●●●●●●●●●●●●●●●●●●●●●●●●●●●●●●●●●●●●●●●●●●●●●●●●●●●●●●●●●●●●●●●●●●●●●●●●●●●●●●●●●●●●●●●●●●●●●●●●●●●●●●●●●●●●●●●●●●●●●●●●●●●●●●●●●●●●●●●●●●●●●●●●●●●●●●●●●●●●●●●●●●●●●●●●●●●●●●●●●●●●●●●●●●●●●●●●●●●●●●●●●●●●●●●●●●●●●●●●●●●●●●●●●●●●●●●●●●●●●●●●●●●●●●●●●●●●●●●●●●●●●●●●●●●●●●●●●●●●●●●●●●●●●●●●●●●●●●●●●●●●●●●●●●●●●●●●●●●●●●●●●●●●●●●●●●●●●●●●●●●●●●●●●●●●●●●●●●●●●●●●●●●●●●●●●●●●●●●●●●●●●●●●●●●●●●●●●●●●●●●●●●●●●●●●●●●●●●●●●●●●●●●●●●●●●●●●●●●●●●●●●●●●●●●●●●●●●●●●●●●●●●●●●●●●●●●●●●●●●●●●●●●●●●●●●●●●●●●●●●●●●●●●●●●●●●●●●●●●●●●●●●●●●●●●●●●●●●●●●●●●●●●●●●●●●●●●●●●●●●●●●●●●●●●●●●●●●●●●●●●●●●●●●●●●●●●●●●●●●●●●●●●●●●●●●●●●●●●●●●●●●●●●●●●●●●●●●●●●●●●●●●●●●●●●●●●●●●●●●●●●●●●●●●●●●●●●●●●●●●●●●●●●●●●●●●●●●●●●●●●●●●●●●●●●●●●●●●●●●●●●●●●●●●●●●●●●●●●●●●●●●●●●●●●●●●●●●●●●●●●●●●●●●●●●●●●●●●●●●●●●●●●●●●●●●●●●●●●●●●●●●●●●●●●●●●●●●●●●●●●●●●●●●●●●●●●●●●●●●●●●●●●●●●●●●●●●●●●●●●●●●●●●●●●●●●●●●●●●●●●●●●●●●●●●●●●●●●●●●●●●●●●●●●●●●●●●●●●●●●●●●●●●●●●●●●●●●●●●●●●●●●●●●●●●●●●●●●●●●●●●●●●●●●●●●●●●●●●●●●●●●●●●●●●●●●●●●●●●●●●●●●●●●●●●●●●●●●●●●●●●●●●●●●●●●●●●●●●●●●●●●●●●●●●●●●●●●●●●●●●●●●●●●●●●●●●●●●●●●●●●●●●●●●●●●●●●●●●●●●●●●●●●●●●●●●●●●●●●●●●●●●●●●●●●●●●●●●●●●●●●●●●●●●●●●●●●●●●●●●●●●●●●●●●●●●●●●●●●●●●●●●●●●●●●●●●●●●●●●●●●●●●●●●●●●●●●●●●●●●●●●●●●●●●●●●●●●●●●●●●●●●●●●●●●●●●●●●●●●●●●●●●●●●●●●●●●●●●●●●●●●●●●●●●●●●●●●●●●●●●●●●●●●●●●●●●●●●●●●●●●●●●●●●●●●●●●●●●●●●●●●●●●●●●●●●●●●●●●●●●●●●●●●●●●●●●●●●●●●●●●●●●●●●●●●●●●●●●●●●●●●●●●●●●●●●●●●●●●●●●●●●●●●●●●●●●●●●●●●●●●●●●●●●●●●●●●●●●●●●●●●●●●●●●●●●●●●●●●●●●●●●●●●●●●●●●●●●●●●●●●●●●●●●●●●●●●●●●●●●●●●●●●●●●●●●●●●●●●●●●●●●●●●●●●●●●●●●●●●●●●●●●●●●●●●●●●●●●●●●●●●●●●●●●●●●●●●●●●●●●●●●●●●●●●●●●●●●●●●●●●●●●●●●●●●●●●●●●●●●●●●●●●●●●●●●●●●●●●●●●●●●●●●●●●●●●●●●●●●●●●●●●●●●●●●●●●●●●●●●●●●●●●●●●●●●●●●●●●●●●●●●●●●●●●●●●●●●●●●●●●●●●●●●●●●●●●●●●●●●●●●●●●●●●●●●●●●●●●●●●●●●●●●●●●●●●●●●●●●●●●●●●●●●●●●●●●●●●●●●●●●●●●●●●●●●●●●●●●●●●●●●●●●●●●●●●●●●●●●●●●●●●●●●●●●●●●●●●●●●●●●●●●●●●●●●●●●●●●●●●●●●●●●●●●●●●●●●●●●●●●●●●●●●●●●●●●●●●●●●●●●●●●●●●●●●●●●●●●●●●●●●●●●●●●●●●●●●●●●●●●●●●●●●●●●●●●●●●●●●●●●●●●●●●●●●●●●●●●●●●●●●●●●●●●●●●●●●●●●●●●●●●●●●●●●●●●●●●●●●●●●●●●●●●●●●●●●●●●●●●●●●●●●●●●●●●●●●●●●●●●●●●●●●●●●●●●●●●●●●●●●●●●●●●●●●●●●●●●●●●●●●●●●●●●●●●●●●●●●●●●●●●●●●●●●●●●●●●●●●●●●●●●●●●●●●●●●●●●●●●●●●●●●●●●●●●●●●●●●●●●●●●●●●●●●●●●●●●●●●●●●●●●●●●●●●●●●●●●●●●●●●●●●●●●●●●●●●●●●●●●●●●●●●●●●●●●●●●●●●●●●●●●●●●●●●●●●●●●●●●●●●●●●●●●●●●●●●●●●●●●●●●●●●●●●●●●●●●●●●●●●●●●●●●●●●●●●●●●●●●●●●●●●●●●●●●●●●●●●●●●●●●●●●●●●●●●●●●●●●●●●●●●●●●●●●●●●●●●●●●●●●●●●●●●●●●●●●●●●●●●●●●●●●●●●●●●●●●●●●●●●●●●●●●●●●●●●●●●●●●●●●●●●●●●●●●●●●●●●●●●●●●●●●●●●●●●●●●●●●●●●●●●●●●●●●●●●●●●●●●●●●●●●●●●●●●●●●●●●●●●●●●●●●●●●●●●●●●●●●●●●●●●●●●●●●●●●●●●●●●●●●●●●●●●●●●●●●●●●●●●●●●●●●●●●●●●●●●●●●●●●●●●●●●●●●●●●●●●●●●●●●●●●●●●●●●●●●●●●●●●●●●●●●●●●●●●●●●●●●●●●●●●●●●●●●●●●●●●●●●●●●●●●●●●●●●●●●●●●●●●●●●●●●●●●●●●●●●●●●●●●●●●●●●●●●●●●●●●●●●●●●●●●●●●●●●●●●●●●●●●●●●●●●●●●●●●●●●●●●●●●●●●●●●●●●●●●●●●●●●●●●●●●●●●●●●●●●●●●●●●●●●●●●●●●●●●●●●●●●●●●●●●●●●●●●●●●●●●●●●●●●●●●●●●●●●●●●●●●●●●●●●●●●●●●●●●●●●●●●●●●●●●●●●●●●●●●●●●●●●●●●●●●●●●●●●●●●●●●●●●●●●●●●●●●●●●●●●●●●●●●●●●●●●●●●●●●●●●●●●●●●●●●●●●●●●●●●●●●●●●●●●●●●●●●●●●●●●●●●●●●●●●●●●●●●●●●●●●●●●●●●●●●●●●●●●●●●●●●●●●●●●●●●●●●●●●●●●●●●●●●●●●●●●●●●●●●●●●●●●●●●●●●●●●●●●●●●●●●●●●●●●●●●●●●●●●●●●●●●●●●●●●●●●●●●●●●●●●●●●●●●●●●●●●●●●●●●●●●●●●●●●●●●●●●●●●●●●●●●●●●●●●●●●●●●●●●●●●●●●●●●●●●●●●●●●●●●●●●●●●●●●●●●●●●●●●●●●●●●●●●●●●●●●●●●●●●●●●●●●●●●●●●●●●●●●●●●●●●●●●●●●●●●●●●●●●●●●●●●●●●●●●●●●●●●●●●●●●●●●●●●●●●●●●●●●●●●●●●●●●●●●●●●●●●●●●●●●●●●●●●●●●●●●●●●●●●●●●●●●●●●●●●●●●●●●●●●●●●●●●●●●●●●●●●●●●●●●●●●●●●●●●●●●●●●●●●●●●●●●●●●●●●●●●●●●●●●●●●●●●●●●●●●●●●●●●●●●●●●●●●●●●●●●●●●●●●●●●●●●●●●●●●●●●●●●●●●●●●●●●●●●●●●●●●●●●●●●●●●●●●●●●●●●●●●●●●●●●●●●●●●●●●●●●●●●●●●●●●●●●●●●●●●●●●●●●●●●●●●●●●●●●●●●●●●●●●●●●●●●●●●●●●●●●●●●●●●●●●●●●●●●●●●●●●●●●●●●●●●●●●●●●●●●●●●●●●●●●●●●●●●●●●●●●●●●●●●●●●●●●●●●●●●●●●●●●●●●●●●●●●●●●●●●●●●●●●●●●●●●●●●●●●●●●●●●●●●●●●●●●●●●●●●●●●●●●●●●●●●●●●●●●●●●●●●●●●●●●●●●●●●●●●●●●●●●●●●●●●●●●●●●●●●●●●●●●●●●●●●●●●●●●●●●●●●●●●●●●●●●●●●●●●●●●●●●●●●●●●●●●●●●●●●●●●●●●●●●●●●●●●●●●●●●●●●●●●●●●●●●●●●●●●●●●●●●●●●●●●●●●●●●●●●●●●●●●●●●●●●●●●●●●●●●●●●●●●●●●●●●●●●●●●●●●●●●●●●●●●●●●●●●●●●●●●●●●●●●●●●●●●●●●●●●●●●●●●●●●●●●●●●●●●●●●●●●●●●●●●●●●●●●●●●●●●●●●●●●●●●●●●●●●●●●●●●●●●●●●●●●●●●●●●●●●●●●●●●●●●●●●●●●●●●●●●●●●●●●●●●●●●●●●●●●●●●●●●●●●●●●●●●●●●●●●●●●●●●●●●●●●●●●●●●●●●●●●●●●●●●●●●●●●●●●●●●●●●●●●●●●●●●●●●●●●●●●●●●●●●●●●●●●●●●●●●●●●●●●●●●●●●●●●●●●●●●●●●●●●●●●●●●●●●●●●●●●●●●●●●●●●●●●●●●●●●●●●●●●●●●●●●●●●●●●●●●●●●●●●●●●●●●●●●●●●●●●●●●●●●●●●●●●●●●●●●●●●●●●●●●●●●●●●●●●●●●●●●●●●●●●●●●●●●●●●●●●●●●●●●●●●●●●●●●●●●●●●●●●●●●●●●●●●●●●●●●●●●●●●●●●●●●●●●●●●●●●●●●●●●●●●●●●●●●●●●●●●●●●●●●●●●●●●●●●●●●●●●●●●●●●●●●●●●●●●●●●●●●●●●●●●●●●●●●●●●●●●●●●●●●●●●●●●●●●●●●●●●●●●●●●●●●●●●●●●●●●●●●●●●●●●●●●●●●●●●●●●●●●●●●●●●●●●●●●●●●●●●●●●●●●●●●●●●●●●●●●●●●●●●●●●●●●●●●●●●●●●●●●●●●●●●●●●●●●●●●●●●●●●●●●●●●●●●●●●●●●●●●●●●●●●●●●●●●●●●●●●●●●●●●●●●●●●●●●●●●●●●●●●●●●●●●●●●●●●●●●●●●●●●●●●●●●●●●●●●●●●●●●●●●●●●●●●●●●●●●●●●●●●●●●●●●●●●●●●●●●●●●●●●●●●●●●●●●●●●●●●●●●●●●●●●●●●●●●●●●●●●●●●●●●●●●●●●●●●●●●●●●●●●●●●●●●●●●●●●●●●●●●●●●●●●●●●●●●●●●●●●●●●●●●●●●●●●●●●●●●●●●●●●●●●●●●●●●●●●●●●●●●●●●●●●●●●●●●●●●●●●●●●●●●●●●●●●●●●●●●●●●●●●●●●●●●●●●●●●●●●●●●●●●●●●●●●●●●●●●●●●●●●●●●●●●●●●●●●●●●●●●●●●●●●●●●●●●●●●●●●●●●●●●●●●●●●●●●●●●●●●●●●●●●●●●●●●●●●●●●●●●●●●●●●●●●●●●●●●●●●●●●●●●●●●●●●●●●●●●●●●●●●●●●●●●●●●●●●●●●●●●●●●●●●●●●●●●●●●●●●●●●●●●●●●●●●●●●●●●●●●●●●●●●●●●●●●●●●●●●●●●●●●●●●●●●●●●●●●●●●●●●●●●●●●●●●●●●●●●●●●●●●●●●●●●●●●●●●●●●●●●●●●●●●●●●●●●●●●●●●●●●●●●●●●●●●●●●●●●●●●●●●●●●●●●●●●●●●●●●●●●●●●●●●●●●●●●●●●●●●●●●●●●●●●●●●●●●●●●●●●●●●●●●●●●●●●●●●●●●●●●●●●●●●●●●●●●●●●●●●●●●●●●●●●●●●●●●●●●●●●●●●●●●●●●●●●●●●●●●●●●●●●●●●●●●●●●●●●●●●●●●●●●●●●●●●●●●●●●●●●●●●●●●●●●●●●●●●●●●●●●●●●●●●●●●●●●●●●●●●●●●●●●●●●●●●●●●●●●●●●●●●●●●●●●●●●●●●●●●●●●●●●●●●●●●●●●●●●●●●●●●●●●●●●●●●●●●●●●●●●●●●●●●●●●●●●●●●●●●●●●●●●●●●●●●●●●●●●●●●●●●●●●●●●●●●●●●●●●●●●●●●●●●●●●●●●●●●●●●●●●●●●●●●●●●●●●●●●●●●●●●●●●●●●●●●●●●●●●●●●●●●●●●●●●●●●●●●●●●●●●●●●●●●●●●●●●●●●●●●●●●●●●●●●●●●●●●●●●●●●●●●●●●●●●●●●●●●●●●●●●●●●●●●●●●●●●●●●●●●●●●●●●●●●●●●●●●●●●●●●●●●●●●●●●●●●●●●●●●●●●●●●●●●●●●●●●●●●●●●●●●●●●●●●●●●●●●●●●●●●●●●●●●●●●●●●●●●●●●●●●●●●●●●●●●●●●●●●●●●●●●●●●●●●●●●●●●●●●●●●●●●●●●●●●●●●●●●●●●●●●●●●●●●●●●●●●●●●●●●●●●●●●●●●●●●●●●●●●●●●●●●●●●●●●●●●●●●●●●●●●●●●●●●●●●●●●●●●●●●●●●●●●●●●●●●●●●●●●●●●●●●●●●●●●●●●●●●●●●●●●●●●●●●●●●●●●●●●●●●●●●●●●●●●●●●●●●●●●●●●●●●●●●●●●●●●●●●●●●●●●●●●●●●●●●●●●●●●●●●●●●●●●●●●●●●●●●●●●●●●●●●●●●●●●●●●●●●●●●●●●●●●●●●●●●●●●●●●● |
|--------------|-------------------------------------------------------------------------------------------------------------------------------------------------------------------------------------------------------------------------------------------------------------------------------------------------------------------------------------------------------------------------------------------------------------------------------------------------------------------------------------------------------------------------------------------------------------------------------------------------------------------------------------------------------------------------------------------------------------------------------------------------------------------------------------------------------------------------------------------------------------------------------------------------------------------------------------------------------------------------------------------------------------------------------------------------------------------------------------------------------------------------------------------------------------------------------------------------------------------------------------------------------------------------------------------------------------------------------------------------------------------------------------------------------------------------------------------------------------------------------------------------------------------------------------------------------------------------------------------------------------------------------------------------------------------------------------------------------------------------------------------------------------------------------------------------------------------------------------------------------------------------------------------------------------------------------------------------------------------------------------------------------------------------------------------------------------------------------------------------------------------------------------------------------------------------------------------------------------------------------------------------------------------------------------------------------------------------------------------------------------------------------------------------------------------------------------------------------------------------------------------------------------------------------------------------------------------------------------------------------------------------------------------------------------------------------------------------------------------------------------------------------------------------------------------------------------------------------------------------------------------------------------------------------------------------------------------------------------------------------------------------------------------------------------------------------------------------------------------------------------------------------------------------------------------------------------------------------------------------------------------------------------------------------------------------------------------------------------------------------------------------------------------------------------------------------------------------------------------------------------------------------------------------------------------------------------------------------------------------------------------------------------------------------------------------------------------------------------------------------------------------------------------------------------------------------------------------------------------------------------------------------------------------------------------------------------------------------------------------------------------------------------------------------------------------------------------------------------------------------------------------------------------------------------------------------------------------------------------------------------------------------------------------------------------------------------------------------------------------------------------------------------------------------------------------------------------------------------------------------------------------------------------------------------------------------------------------------------------------------------------------------------------------------------------------------------------------------------------------------------------------------------------------------------------------------------------------------------------------------------------------------------------------------------------------------------------------------------------------------------------------------------------------------------------------------------------------------------------------------------------------------------------------------------------------------------------------------------------------------------------------------------------------------------------------------------------------------------------------------------------------------------------------------------------------------------------------------------------------------------------------------------------------------------------------------------------------------------------------------------------------------------------------------------------------------------------------------------------------------------------------------------------------------------------------------------------------------------------------------------------------------------------------------------------------------------------------------------------------------------------------------------------------------------------------------------------------------------------------------------------------------------------------------------------------------------------------------------------------------------------------------------------------------------------------------------------------------------------------------------------------------------------------------------------------------------------------------------------------------------------------------------------------------------------------------------------------------------------------------------------------------------------------------------------------------------------------------------------------------------------------------------------------------------------------------------------------------------------------------------------------------------------------------------------------------------------------------------------------------------------------------------------------------------------------------------------------------------------------------------------------------------------------------------------------------------------------------------------------------------------------------------------------------------------------------------------------------------------------------------------------------------------------------------------------------------------------------------------------------------------------------------------------------------------------------------------------------------------------------------------------------------------------------------------------------------------------------------------------------------------------------------------------------------------------------------------------------------------------------------------------------------------------------------------------------------------------------------------------------------------------------------------------------------------------------------------------------------------------------------------------------------------------------------------------------------------------------------------------------------------------------------------------------------------------------------------------------------------------------------------------------------------------------------------------------------------------------------------------------------------------------------------------------------------------------------------------------------------------------------------------------------------------------------------------------------------------------------------------------------------------------------------------------------------------------------------------------------------------------------------------------------------------------------------------------------------------------------------------------------------------------------------------------------------------------------------------------------------------------------------------------------------------------------------------------------------------------------------------------------------------------------------------------------------------------------------------------------------------------------------------------------------------------------------------------------------------------------------------------------------------------------------------------------------------------------------------------------------------------------------------------------------------------------------------------------------------------------------------------------------------------------------------------------------------------------------------------------------------------------------------------------------------------------------------------------------------------------------------------------------------------------------------------------------------------------------------------------------------------------------------------------------------------------------------------------------------------------------------------------------------------------------------------------------------------------------------------------------------------------------------------------------------------------------------------------------------------------------------------------------------------------------------------------------------------------------------------------------------------------------------------------------------------------------------------------------------------------------------------------------------------------------------------------------------------------------------------------------------------------------------------------------------------------------------------------------------------------------------------------------------------------------------------------------------------------------------------------------------------------------------------------------------------------------------------------------------------------------------------------------------------------------------------------------------------------------------------------------------------------------------------------------------------------------------------------------------------------------------------------------------------------------------------------------------------------------------------------------------------------------------------------------------------------------------------------------------------------------------------------------------------------------------------------------------------------------------------------------------------------------------------------------------------------------------------------------------------------------------------------------------------------------------------------------------------------------------------------------------------------------------------------------------------------------------------------------------------------------------------------------------------------------------------------------------------------------------------------------------------------------------------------------------------------------------------------------------------------------------------------------------------------------------------------------------------------------------------------------------------------------------------------------------------------------------------------------------------------------------------------------------------------------------------------------------------------------------------------------------------------------------------------|



| conservation                         | 980                 | 990              | 1000             | 1010           | 1020           | 1030            | 1040       | 1050 |      |
|--------------------------------------|---------------------|------------------|------------------|----------------|----------------|-----------------|------------|------|------|
| <i>Callorhinchus milii</i>           | ACAATTTTGGAAAAATTC  | ATCCATGATTGAGTTA | CCACC            | GATGGACGCAAA   | GTGTCTGT       | CATCCAA         | CAGCGTGGGA | CATG | 1056 |
| <i>Alligator mississippiensis</i>    | CAGGTTTCTGGATCAACT  | TCTATGCTTACTGAG  | CCTAAT           | GAT...AGAAAGGT | TGGTTTGG       | CATCCTACAGCT    | TGGGATATG  |      | 1044 |
| <i>Anolis carolinensis</i>           | AAGGCTTCTGGGACAAT   | TCCATGCTTGAAGAA  | CCTAAT           | GATGGCAGAAAG   | GTGTGTGT       | CATCCTACAGCT    | TGGGATTTA  |      | 1080 |
| <i>Astyanax mexicanus</i>            | CGAACTTCTGGACAAACT  | CAATGCTGACGAA    | AACTACT          | GACGGTACA      | AAAGTGGTGT     | GCCACCCAACAGCT  | TGGGATATG  |      | 1050 |
| <i>Boleophthalmus pectinirostris</i> | ATAATTTCTGGACCGAAT  | CGATGTTTGTGAAA   | CCCGAA           | GACGGACGCAAA   | AGTCGTGTGT     | CACCCAACCGCT    | TGGGACATG  |      | 1062 |
| <i>Cynoglossus semilaevis</i>        | ACAACTTTGGGAATACT   | TATGCTGACGAA     | AGCTGAT          | GATGGACGTCAG   | TGGTGTGT       | CATCCCCTCGT     | TGGGATATG  |      | 1053 |
| <i>Danio rerio</i>                   | ACAACTTCTGGGAACAAC  | TCAATGTTTATTA    | AACT...GAAGAAAG  | AGATGTGGTTT    | TGCCATCCTACCGC | ATGGGATATG      |            |      | 1047 |
| <i>Esox lucius</i>                   | ACAACTTCTGGGAAAACT  | TCCATGCTGGAGAA   | AGCCAACA         | GACGGGAGAAAC   | GTGTGTGT       | CACCTACAGCT     | TGGGACATG  |      | 1059 |
| <i>Fundulus heteroclitus</i>         | ACAACTTCTGGACTAAT   | TCCATGCTGGTGAGG  | CCCGAC           | GATGGACGGAAC   | GTGTGTGT       | CACCCACAGCT     | TGGGACATG  |      | 1065 |
| <i>Gekko japonicus</i>               | AGGGCTTCTGGGAAAAT   | TCTATGCTTGTAGAA  | CCTAAC           | GATGGCAGGAAAG  | TTGTCTGT       | CATCCCCTGCT     | TGGGATATG  |      | 1053 |
| <i>Haplochromis burtoni</i>          | ACAACTTCTGGACTGACT  | TCTATGTTTGTACAT  | CCCGAT           | GATGGACGCAAT   | GTGGTCTGT      | CACCCACAGCT     | TGGGACATG  |      | 1059 |
| <i>Hippocampus comes</i>             | ACAACTTCTGGAAACAAC  | TCCATGCTGGTGAAG  | CCTGAA           | GATGGACGCAAG   | GTGGTCTGT      | CATCCCACAGCT    | TGGGACATG  |      | 1053 |
| <i>Ictalurus punctatus</i>           | CTAACTTCTGGGAAAACT  | TCAATGTTTCTGTA   | AACTCAGT         | GATGGCAGGAAAG  | TGGTGTGT       | CACCCACAGC      | ATGGGACATG |      | 1050 |
| <i>Larimichthys crocea</i>           | CAAATTTCTGGGAATACT  | TCCATGTTTCTGTA   | AGCCT...GATGGACG | CAAGTGGTCTGT   | CACCCACAGCT    | TGGGACATG       |            |      | 1056 |
| <i>Lates calcarifer</i>              | AAAACTTCTGGGAATACT  | TCCATGTTTGGTGA   | AACTGAC          | GATGGACGCAAG   | TGGTCTGT       | CACCTACAGCT     | TGGGACATG  |      | 1059 |
| <i>Latimeria chalumnae</i>           | CTTGCTTTTGGGAATTACT | TCCATGATTGAACAA  | CCTACT           | GAT...AGAAAGGT | TGTCTGCCAT     | CCAACAGCGT      | TGGGACATG  |      | 1188 |
| <i>Lepisosteus oculatus</i>          | ACAATTTCTGGAAATGAG  | TCCATGCTGGAGAA   | AACTGAT          | GATGGGAGGAAG   | TGGTGTGT       | GCCACCCAACGGCT  | TGGGACATG  |      | 1050 |
| <i>Macaca fascicularis</i>           | AAGGATTCTGGGAAAAT   | TCCATGCTTAACGTAT | CCAGGAAAT        | GTTTCAGAAAG    | TAGTCTGCCAC    | CCCCACAGCT      | TGGGACCTG  |      | 1053 |
| <i>Manacus vitellinus</i>            | AGGGCTTCTGGACAAACT  | TCTATGCTCACAGAG  | CCGACT           | GATGGCAGGAAG   | TTGTCTGCCAC    | CCAACAGC        | ATGGGATCTG |      | 1059 |
| <i>Mus musculus</i>                  | AAGGATTCTGGGCAAAC   | TCTATGCTGACTGAG  | CCAGCA           | GATGGCCGGAAG   | TTGTCTGCCAC    | CCCCACAGCT      | TGGGATCTG  |      | 1053 |
| <i>Neolamprologus brichardi</i>      | ACAACTTCTGGACTCACT  | TCTATGTTTGTACAT  | CCCGAT           | GATGGACGCAAT   | GTGGTCTGT      | CACCCACAGCT     | TGGGACATG  |      | 1059 |
| <i>Oncorhynchus mykiss</i>           | ACAACTTCTGGAAGGACT  | TCTATGCTGGAGAA   | AACTACT          | GATGGCAGGAAG   | TGTGTGT        | GCCACCTACAGCT   | TGGGACATG  |      | 1062 |
| <i>Oreochromis niloticus</i>         | ACAACTTCTGGACTAACT  | TCTATGTTTGAACAC  | CCCGAT           | GATGGACGCAAG   | TGTGTGT        | CACCCACAGCT     | TGGGACATG  |      | 1059 |
| <i>Poecilia formosa</i>              | ACAACTTCTGGACTAACT  | TCCATGCTGGTGAAG  | CCCAAT           | GATGGACGGAAC   | GTAGTCTGCCAC   | CCCCACCGCT      | TGGGACATG  |      | 1062 |
| <i>Poecilia latipinna</i>            | ACAACTTCTGGACTAACT  | TCCATGCTGGTGAAG  | CCCAAT           | GATGGACGGAAC   | GTAGTCTGCCAC   | CCCCACCGCT      | TGGGACATG  |      | 1062 |
| <i>Pseudopodoces humilis</i>         | AGGGCTTCTGGGAAAAC   | TCCATGCTCACAGAG  | CCGACA           | GACAACAGGAAG   | TTGTGTGCCAT    | CCTACAGC        | ATGGGACCTG |      | 1053 |
| <i>Pundamilia nyererei</i>           | ACAACTTCTGGACTGACT  | TCTATGTTTGTACAT  | CCCGAT           | GATGGACGCAAT   | GTGGTCTGT      | CACCCACAGCT     | TGGGACATG  |      | 1059 |
| <i>Pygocentrus nattereri</i>         | CCAACTTCTGGAATAAT   | TCAATGTTTCTGTA   | AACT...GAGGGG    | AGAAAGTGGTGT   | GTCACCTACAGC   | ATGGGACATG      |            |      | 1047 |
| <i>Python bivittatus</i>             | AAGGTTTCTGGAAAAAT   | TCAATGCTTGAAGAA  | CCTAAA           | GATGGCAGGAAAG  | TTGTGTGT       | TGCCATCCCACAGCT | TGGGATATG  |      | 1044 |
| <i>Rattus norvegicus</i>             | CGGGATTCTGGACAAACT  | TCCATGCTGACTGAG  | CCAGGA           | GATGACCGGAAG   | TTGTGTGT       | TGCCACCCACAGCT  | TGGGATCTG  |      | 1053 |
| <i>Scleropages formosus</i>          | ACTCCTTCTGGAGCAACT  | TCAATGTTTCAAAAG  | CCTGAG           | GATGGACAAAAG   | ATAGTGTGCCAC   | CCAACCTGCT      | TGGGATATG  |      | 1059 |
| <i>Sinocyclocheilus anshuiensis</i>  | ACAACTTCTGGACAAACT  | TCAATGTTTATTAAG  | CCT...GAAGAA     | GAGACGTGGTGT   | GTCATCCTACTG   | CATGGGACATG     |            |      | 1047 |
| <i>Xenopus tropicalis</i>            | AAAACTTTGGGAATAAT   | TCAATGCTTAGAGGAG | CCTAAA           | GATGGAAGCAAG   | TTGTGTGT       | CACCTACAGCT     | TGGGATTTG  |      | 1059 |
| <i>Lipotes vexillifer</i>            | AAGGATTCTGGGATAACT  | TCCATGCTAACTGAG  | CCAGGC           | GATGGCCGGAAG   | TGGTGTGT       | TGCCACCCACAGC   | ATGGGACCTG |      | 1050 |
| <i>Orcinus orca</i>                  | AAGGATTCTGGGATAACT  | TCCATGCTAACTGAG  | CCAGGC           | GATGGCCGGAAG   | TGGTGTGT       | TGCCACCCACAGC   | ATGGGACCTG |      | 1050 |
| <i>Homo sapiens</i>                  | AAGGATTCTGGGAAAAT   | TCCATGCTTAACGGA  | ACCCAGGAA        | ATGTTTCAGAA    | AGCAGTCTGCCAT  | CCCACAGCT       | TGGGACCTG  |      | 1053 |

| conservation                         | 1060            | 1070              | 1080       | 1090         | 1100        | 1110       | 1120        | 1130 |      |
|--------------------------------------|-----------------|-------------------|------------|--------------|-------------|------------|-------------|------|------|
| <i>Callorhinchus milii</i>           | GGGAATAGGGTTGAT | TTCAGGATTAAAATGTG | CACTAAAAAT | TAAATATGGAAG | ACTTCTTGAC  | CGTACACCAT | GAAATGGG    |      | 1136 |
| <i>Alligator mississippiensis</i>    | GGA...ATGAAGGAT | TACAGGATCAAGATGTG | CACCAAAAGT | GACTATGGATG  | ACTTCTTGAC  | AGC        | CATGAGATGGG |      | 1121 |
| <i>Anolis carolinensis</i>           | GGA...AAAAATGAC | TACAGGATCAAGATGTG | CACCAAAAGT | GACTATGGATG  | ACTTCTTGAC  | AGC        | CATGAGATGGG |      | 1157 |
| <i>Astyanax mexicanus</i>            | GGCAACCGAGAAGAC | TTTAGAATCAAGATGTG | CACCAAAAGT | TAAACATGGACG | ATTTCTTGAC  | TGCCAC     | CAGATGGG    |      | 1130 |
| <i>Boleophthalmus pectinirostris</i> | GGCAACCAAAAGGAC | TACAGGATCAAAATGTG | CACTAAAAAT | CACCATGGAAG  | ACTTCTTGAC  | GGTGACCAC  | GATGGG      |      | 1142 |
| <i>Cynoglossus semilaevis</i>        | GGGAACAGAATGGAC | TACAGGATCAAAATGTG | CACCAAGGT  | TAAACATGGAGG | ACTTCTTGAC  | GGTGACC    | ATGAGATGGG  |      | 1133 |
| <i>Danio rerio</i>                   | GGAAACAGAAAGGAC | TTTAGAATCAAAATGTG | CACTAAAGT  | GAAACATGGATG | ATTTCTTAACT | GTCCACC    | ATGAGATGGG  |      | 1127 |
| <i>Esox lucius</i>                   | GGGAACAGGAGGAC  | TTTAGAATCAAGATGTG | CACGAGGT   | TAAACATGGATG | ACTTCTTGAC  | AGCGCACC   | ATGAGATGGG  |      | 1139 |
| <i>Fundulus heteroclitus</i>         | GGAAACAGAGAGGAC | TTTAGAATCAAAATGTG | CACCAAGGT  | TAAACATGGACG | ACTTCTTGAC  | CGTGACC    | ATGAGATGGG  |      | 1145 |
| <i>Gekko japonicus</i>               | GGA...AAAGGAGAC | TACAGGATCAAGATGTG | CACCAAAAGT | GACTATGGATG  | ACTTCTTGAT  | GCACACC    | ATGAGATGGG  |      | 1130 |
| <i>Haplochromis burtoni</i>          | GGAAACAGAAAGGAC | TTTAGGATCAAGATGTG | CACCCAGGT  | TAAACATGGACA | ACTTCTTGAC  | AGC        | CATGAAATGGG |      | 1139 |
| <i>Hippocampus comes</i>             | GGGAACAGAAAGGAC | TTTAGGATCAAAATGTG | CACTAAAGT  | TAAACATGGAGA | ACTTCTTGAC  | TGCTCCACC  | ATGAGATGGG  |      | 1133 |
| <i>Ictalurus punctatus</i>           | GGCAACCGTGAGGAC | TTTAGAATCAAGATGTG | CACTAAGT   | GAGCATGGACCA | ATTTCTTAACT | TAACCGC    | ATGAGATGGG  |      | 1130 |
| <i>Larimichthys crocea</i>           | GGAAACAGAGAGGAC | TTTAGGATCAAAATGTG | CACCCAGGT  | TAAACATGGACA | ACTTCTTGAC  | AGTGACC    | ATGAGATGGG  |      | 1136 |
| <i>Lates calcarifer</i>              | GGAAACAGAGAGGAC | TTTAGAATCAAAATGTG | CACCAAGGT  | TAAACATGGACG | ACTTCTTGAC  | AGTGACC    | ATGAGATGGG  |      | 1139 |
| <i>Latimeria chalumnae</i>           | GGAAATGGAAGGAT  | TTTAGAATCAAGATGTG | CACCAAAAGT | TAAACATGGACA | ATTTCTTGAC  | TATTCAT    | GAAATGGG    |      | 1268 |
| <i>Lepisosteus oculatus</i>          | GGCAATGGAAGGAC  | TTTAGAATCAAAATGTG | CAGTAAAGT  | TAAACATGGATG | ACTTCTTGAC  | AGTTACC    | ATGAGATGGG  |      | 1130 |
| <i>Macaca fascicularis</i>           | GGG...AAGGGTGAC | TTTAGGATCAATATGTG | CACAAAGGT  | TAAACATGGACG | ACTTCTTGAC  | AGCTCAT    | GAGATGGG    |      | 1130 |
| <i>Manacus vitellinus</i>            | GGG...AATAACGAT | TACAGGATCAAGATGTG | CACCAAAAGT | GACCATGGATG  | ACTTCTTGAC  | TGACACC    | ATGAGATGGG  |      | 1136 |
| <i>Mus musculus</i>                  | GGA...CACGGAGAC | TTTAGAATCAAGATGTG | TAAAAAGT   | TAAACATGGACA | ACTTCTTGAC  | AGCCCAT    | CAGATGGG    |      | 1130 |
| <i>Neolamprologus brichardi</i>      | GGAAACAGAAAGGAC | TTTAGGATCAAGATGTG | CACCCAGGT  | TAAACATGGACA | ACTTCTTGAC  | AGC        | CATGAAATGGG |      | 1139 |
| <i>Oncorhynchus mykiss</i>           | GGGAACAGAGAGGAC | TTTAGGATCAAGATGTG | TACGAGGT   | TAAACATGGACA | ACTTCTTGAC  | AGC        | CATGAAATGGG |      | 1142 |
| <i>Oreochromis niloticus</i>         | GGAAACAGAAAGGAC | TTTAGGATCAAGATGTG | CACCCAGGT  | TAAACATGGACA | ACTTCTTGAC  | AGC        | CATGAAATGGG |      | 1139 |
| <i>Poecilia formosa</i>              | GGAAACAGAGAGGAC | TTTAGGATCAAAATGTG | CACCAAGGT  | TAAACATGGACG | ACTTCTTGAC  | CGTGACC    | CAGATGGG    |      | 1142 |
| <i>Poecilia latipinna</i>            | GGAAACAGAGAGGAC | TTTAGGATCAAAATGTG | CACCAAGGT  | TAAACATGGACG | ACTTCTTGAC  | CGTGACC    | CAGATGGG    |      | 1142 |
| <i>Pseudopodoces humilis</i>         | GGC...AAAAACGAT | TACAGGATCAAGATGTG | CACCAAAAGT | GACCATGGATG  | ACTTCTTGAC  | TGACACC    | CAGATGGG    |      | 1130 |
| <i>Pundamilia nyererei</i>           | GGAAACAGAAAGGAC | TTTAGGATCAAGATGTG | CACCCAGGT  | TAAACATGGACA | ACTTCTTGAC  | AGC        | CATGAAATGGG |      | 1139 |
| <i>Pygocentrus nattereri</i>         | GGAAATCGAGAGGAC | TTTAGAATCAAGATGTG | CACCAAAAGT | TAAACATGGATG | ATTTCTTGAC  | CGCCACC    | CAGATGGG    |      | 1127 |
| <i>Python bivittatus</i>             | GGG...AAAAAGAC  | TACAGGATCAAGATGTG | CACGAAAT   | TAAACATGGACG | ATTTCTTGAC  | AGC        | CATGAAATGGG |      | 1121 |
| <i>Rattus norvegicus</i>             | GGA...CATGGAGAC | TTTAGAATCAAGATGTG | CACAAAGGT  | TAAACATGGACA | ACTTCTTGAC  | AGCCCAT    | CATGAGATGGG |      | 1130 |
| <i>Scleropages formosus</i>          | GGCAACAGGGAGGAT | TTTAGGATCAAAATGTG | CACCAAAAGT | GAAATATGGATG | ACTTTTGTGAC | AGTCCACC   | ATGAGATGGG  |      | 1139 |
| <i>Sinocyclocheilus anshuiensis</i>  | GGCAACAGGGAGGAC | TTTAGAATCAAAATGTG | CACTAAAGT  | GAAACATGGATG | ATTTCTTAACT | GTTACC     | ATGAGATGGG  |      | 1127 |
| <i>Xenopus tropicalis</i>            | GGA...ATGAATGAC | TTTAGAATCAAGATGTG | CACAAAGGT  | GAAATATGGAAG | ACTTCTTGAC  | TACAGTACC  | CAGATGGG    |      | 1136 |
| <i>Lipotes vexillifer</i>            | GGG...AAGGGTGAC | TTTAGGATCAAAATGTG | CACAAAGGT  | GACGATGGATG  | ACTTCTTGAC  | AGCCCAT    | CAGATGGG    |      | 1127 |
| <i>Orcinus orca</i>                  | GGG...AAGGGTGAC | TTTAGGATCAAAATGTG | CACAAAGGT  | GACGATGGATG  | ACTTCTTGAC  | AGCCCAT    | CAGATGGG    |      | 1127 |
| <i>Homo sapiens</i>                  | GGG...AAGGGTGAC | TTTAGGATCCTTATGTG | CACAAAGGT  | GAAATATGGACG | ACTTCTTGAC  | AGCTCAT    | CATGAGATGGG |      | 1130 |









## conservation

|                                      |                                                                                     |      |
|--------------------------------------|-------------------------------------------------------------------------------------|------|
| <i>Callorhinchus milii</i>           | TTGTTGGTGTTCGAACTGTTCCTCATGATGAACTTACTGTGATCCTGCTGCTCTGTTCCATATTGCTAATGACTAT        | 1536 |
| <i>Alligator mississippiensis</i>    | TAGTTGGTGTGGTTGAACAGTGCCTCATGACGAAACATACTGTGACCCCTGCAGCCCTGTTCCATGTGGCCAATGATTAC    | 1521 |
| <i>Anolis carolinensis</i>           | TAGTTGGTGTCTGTGAAACCACTGCCACATGACGAGACATAATTGTGACCCCTGCAGTTCTTTTCCATGTAGCCAATGACTAC | 1557 |
| <i>Astyanax mexicanus</i>            | TGTTTGGAGTGACGGAGCCTTTGCCCAGAGATGAATCCTATTGTGACCCACCTGCTCTTTTCCACGTGTCTGGAGATTAT    | 1530 |
| <i>Boleophthalmus pectinirostris</i> | TGGTGGGAGTGGTGGAGCCAGTTCCCTCATGACGAGACCTACTGTGACCCCTGCTCTGTTCCACGTGTCCGGAGACTAT     | 1542 |
| <i>Cynoglossus semilaevis</i>        | TGGTGGGGGTCTAGAGCCTGTGCCCAGAGACGAGACGTACTGTGACCCCTGCTCTGTTCCACGTATCTGGAGATTAT       | 1533 |
| <i>Danio rerio</i>                   | TTGTTGGAGTGGCCGAGGCTGTTCCAGAGATGAGACGTACTGTGACCCCTCCAGCACTTTTCCACGTTTCTGGAGATTAC    | 1527 |
| <i>Esox lucius</i>                   | TGTTTGGTGTAGTTGAGCCCTGCCCAGAGATGAGACGTACTGTGATCCTGCTGCCCTGTTCCATGTGTCCGGGGACTAC     | 1539 |
| <i>Fundulus heteroclitus</i>         | TGTTGGGAGTTGCTGAGCCCGTACCGAGAGATGAAACTTACTGCGACCCACCTGCTCTGTTCCACGTGTCTGGGGACTAC    | 1545 |
| <i>Gekko japonicus</i>               | TAGTGGGTGTTGTTGAGCCATTGCCTCATAATGAGGCATACTGTGATCCTGCAGCTCTCTTTCCACGTAGCCAATGACTAC   | 1530 |
| <i>Haplochromis burtoni</i>          | TGTTTGGGGTGATGGAGCCAGTGCCAAGAATGAGACTTACTGTGACCCACCCGCTCTGTTCCATGTGTCTGGAGACTAT     | 1539 |
| <i>Hippocampus comes</i>             | TAGTTGGCTGTGGAGCCCGTGCCGAGGATGAGACTTACTGTGACCCCTGCTCTGTTCCACGTCTCTGGAGACTAT         | 1533 |
| <i>Ictalurus punctatus</i>           | TGGTTGGTGTGGTGGAGCCTTTACCTAGAGATGAGACATATTGTGACCCACCTGCTCTTTTCCATGTGTCTGGGGATTAC    | 1530 |
| <i>Larimichthys crocea</i>           | TGTTTGGGGTGTGGAGCCAGTGCCAAGAATGAGACCTACTGTGACCCACCTGCTCTGTTCCATGTATCAGGAGACTAT      | 1536 |
| <i>Lates calcarifer</i>              | TGGTAGGGGTGGTGGAGCCGGTGCCAAGAATGAGACTTACTGTGACCCACCTGCTCTGTTCCATGTGTCTGGAGACTAT     | 1539 |
| <i>Latimeria chalumnae</i>           | TTGTTGGTGTAGTAGACCCGTGCCTCATGATGAGTCTTTTGTGATCCAGCTGCCCTTTTCCACGTGGCAAATGACTAC      | 1668 |
| <i>Lepisosteus oculatus</i>          | TAATTGGTGTGGTTCGAGCCTGTGCCCGAGATGAATCCTACTGTGACCCCTGCTCTGTTCCACGTGTCTGAACGACTAC     | 1530 |
| <i>Macaca fascicularis</i>           | TAGTTGGGTGTGGTGGAACTGTGCCCATGATGAAACATACTGTGACCCCGCATCTCTGTTCCATGTTTCTAATGATTAC     | 1530 |
| <i>Manacus vitellinus</i>            | TAGTTGGTGTGTGGAAACAGTCCCTCATGATGAAACCTATTGCGACCCCTGCAGCACTGTTTTCATGTGGCCAATGATTAC   | 1536 |
| <i>Mus musculus</i>                  | TCGTTGGTGTGGTGGAGCCTCTGCCTCATGATGAAACATACTGTGACCCCTGCATCTCTGTTCCATGTTTCTAATGATTAC   | 1530 |
| <i>Neolamprologus brichardi</i>      | TGTTTGGGGTGATGGAGCCAGTGCCAAGAATGAGACTTACTGTGACCCACCCGCTCTGTTCCATGTGTCTGGAGACTAT     | 1539 |
| <i>Oncorhynchus mykiss</i>           | TGTTCCGTGTAGTTGGAGCCCTTACCCAGAGATGAGACATACTGTGACCCGCTGCTCTGTTCCACGTGTCTGGAGACTAC    | 1542 |
| <i>Oreochromis niloticus</i>         | TGGTTGGGTGTGGAGCCAGTGCCAAGAATGAGACTTACTGTGACCCACCCGCTCTGTTCCATGTGTCTGGAGACTAT       | 1539 |
| <i>Poecilia formosa</i>              | TGTTGGGAGTTGTTCGAGCCTGTGCCCAGAGACGAAACTTATTGTGACCCGCTGCTCTGTTCCACGTATCTGGAGACTAC    | 1542 |
| <i>Poecilia latipinna</i>            | TGGTGGGAGTTGTTCGAGCCTGTGCCCAGAGACGAAACTTATTGTGACCCGCTGCTCTGTTCCACGTATCTGGAGACTAC    | 1542 |
| <i>Pseudopodoces humilis</i>         | TAGTTGGTGTGTGGAAACAGTCCCTCACGATGAAACCTACTGCGACCCGGCCACACTGTTTTCATGTGGCCAACGATTAC    | 1530 |
| <i>Pundamilia nyererei</i>           | TGTTTGGGGTGATGGAGCCAGTGCCAAGAATGAGACTTACTGTGACCCGCTGCTCTGTTCCATGTGTCTGGAGACTAT      | 1539 |
| <i>Pygocentrus nattereri</i>         | TGGTAGGTGTGGTGGAGCCTTTACCCAGAGATGAGACATATTGTGACCCCTGCTGCTCTTTTCCACGTGTCTGGGACTAT    | 1527 |
| <i>Python bivittatus</i>             | TGTTTGGGGTGTGGAAACCGTTGCCTCACAATGAGGAATATTGTGATCCTGCTGCTCTGTTTTCATGTTGCCAATGACTAC   | 1521 |
| <i>Rattus norvegicus</i>             | TCGTTGGTGTGGTGGAGCCTCTGCCTCATGATGAAACATACTGTGACCCCTGCATCTCTGTTCCATGTCTCTAATGATTAC   | 1530 |
| <i>Scleropages formosus</i>          | TGGTTGGAGTTGTAGAACCTTTGCCCAGAGATGAAACATACTGTGATCCAGCTGCTTTGTACCACGTGTCCAATGACTAT    | 1539 |
| <i>Sinocyclocheilus anshuiensis</i>  | TAGTTGGAGTGGCTGAGGCTGTGCCCAGAGATGAGTCTTACTGTGACCCACCTGCCCTTTTCCATGTGTCTGGGACTTTT    | 1527 |
| <i>Xenopus tropicalis</i>            | TAGTTGGAGTGGTGGAACTGTGCCCATGATGAAACCTACTGTGACCCGCGAGCTCTTTTTCACGTGTCCAATGACTAT      | 1536 |
| <i>Lipotes vexillifer</i>            | TAGTCGGGGTGTGGAGCCTCTGCCCATGATGAAACATACTGTGACCCGCGTGTCTGTTCCATGTTGCTGAAGATTAC       | 1527 |
| <i>Orcinus orca</i>                  | TAGTCGGGGTGTGGAGCCTCTGCCCATGATGAAACATACTGTGACCCGCGTGTCTGTTCCATGTTGCTGAAGATTAC       | 1527 |
| <i>Homo sapiens</i>                  | TAGTTGGGGTGTGGAACTGTGCCCATGATGAAACATACTGTGACCCGCGATCTCTGTTCCATGTTTCTAATGATTAC       | 1530 |

## conservation

|                                      |                                                                                        |      |
|--------------------------------------|----------------------------------------------------------------------------------------|------|
| <i>Callorhinchus milii</i>           | TCCTTTATAAGGTACTATACCAGGACTATATTCAGTTCCAGTTCCAGGAAGCTCTGTGCCAAGCTGCTGGAACACTGG         | 1616 |
| <i>Alligator mississippiensis</i>    | TCTTTTCATAAGATATTACACAAGGACCAATTTATCAGTTCCAGTTTCAGGAGGCATTTGCAAGGCTGCTAAACATACAGG      | 1601 |
| <i>Anolis carolinensis</i>           | TCTTTTCATAAGATATTACACAAGAACCATTATCAGTTCCAGTTTCAGGAGGCATTTGCAAGGCTGCTGGTCATACAGA        | 1637 |
| <i>Astyanax mexicanus</i>            | TCCTTTATAAGATACTTTACCAGGACAGTATACCAGTTCCAGTTACAGGATGCTCTCTGTAAGGAAGCTGGTCACACTGG       | 1610 |
| <i>Boleophthalmus pectinirostris</i> | TCCTTCATCAGATATTTACCAGGACGATTTATCAGTTCCAGTTTCAGAAGGCTCTGTGTGACCGGAAGGGACACACGGG        | 1622 |
| <i>Cynoglossus semilaevis</i>        | TCTTTTCATCAGGTACTTACCAGAACCATCTACAGTTCCAGTTTCAGAAGGCGCTTGCGATGCAGCCAATCACACGGG         | 1613 |
| <i>Danio rerio</i>                   | TCTTTTCATTAGGTACTTCACTAGAACCATATATCAGTTCCAGTTTCAGAAGGCATTATGTAAGGCAGCTGGCCACACCGG      | 1607 |
| <i>Esox lucius</i>                   | TCTTTTCATCAGATATTTACACAAGGACCATCTACAGTTCCAGTTTCAGAAAGCCCTGTGTGAGGCAGCAGGACATCCGG       | 1619 |
| <i>Fundulus heteroclitus</i>         | TCCTTCATCAGGTATTTTACACAAGAACCATCTATCAGTTTCAGTTCCAGAAAGCGCTGTGTGACGCAGCCGGTCACACTGG     | 1625 |
| <i>Gekko japonicus</i>               | TCTTTTATAAGATACTACACAAGGACAATTTATCAGTTCCAGTTTCAGAAGGCATTTGCAAGGCGCTAATCACACGGG         | 1610 |
| <i>Haplochromis burtoni</i>          | TCATTTCATCAGGTACTTACACAGAACCATCTACAGTTTCAGTTCCAAAAAGCGCTCTGCGATGCGGCCGGTCACACGGG       | 1619 |
| <i>Hippocampus comes</i>             | TCCTTCATCAGGTACTTACACAAGAACCATTACAGTTCCAGTTTCAGAAAGCCCTTTGTCTATGCTGCCGGTCAGTCCGA       | 1613 |
| <i>Ictalurus punctatus</i>           | TCATTTCATCCGATACTTTACAGAAGCATATACAGTTCCAGTTTCAGGCTGCGCTTTGGCAGGAAGCTGGCCACAGTGG        | 1610 |
| <i>Larimichthys crocea</i>           | TCTTTTCATCAGGTACTTCACTAGAACCATCTACAGTTTCAGTTCCAAAAAGGCGCTCTGTGACGCAGCCGGTCATACAGA      | 1616 |
| <i>Lates calcarifer</i>              | TCTTTTCATCAGGTACTTACACAAGAACCATCTACAGTTCCAGTTCCAAAAAGCGCTCTGTGATGCGGCCGGTCACACAGA      | 1619 |
| <i>Latimeria chalumnae</i>           | TCCTTTATAAGATATTATACAAGAACAATCTATCAATTCAGTTTCAGGAAGCACTCTGCAGTGCTACTAATCACACTGG        | 1748 |
| <i>Lepisosteus oculatus</i>          | TCCTTCATCAGGTACTTACACAAGAACCATTACAGTTCCAGTTTCAGAAAGCTCTGTGTGATGCAAAAGGAACACACTGG       | 1610 |
| <i>Macaca fascicularis</i>           | TCATTTCATCGATATTACACAAGGACCATTTACCAATTCAGTTTCAGTTTCAGAAAGCACTTTGTCAAGCAGCTAAACAGGAAG   | 1610 |
| <i>Manacus vitellinus</i>            | TCCTTCATAAGGTATTACACCCGGACCATCTATCAGTTTCAGTTTCAGGAGGCATTTGCAAGGCAGCTAACCATACTGG        | 1616 |
| <i>Mus musculus</i>                  | TCATTTCATTCGATATTACACAAGGACCATTTACCAATTCAGTTTCAGTTTCAGAAAGCTCTTTGTCAAGCAGCTAAGTATAATGG | 1610 |
| <i>Neolamprologus brichardi</i>      | TCATTTCATCAGGTACTTACACAGAACCATCTACAGTTTCAGTTTCAGAAAGCGCTCTGCGATGCGGCCGGTCACACAGG       | 1619 |
| <i>Oncorhynchus mykiss</i>           | TCCTTCATCAGATACTTACCAGGACTGTCTATCAGTTTCAGTTTCAGAAAGGCTCTCTGTGAGGCAGCTGGCCACTCTGG       | 1622 |
| <i>Oreochromis niloticus</i>         | TCATTTCATCAGATACTTACACAAGGACCATTTACAGTTTCAGTTTCAGAAAGCGCTCTGCGATGCGGCCGGTCACACAGG      | 1619 |
| <i>Poecilia formosa</i>              | TCCTTCATCAGGTATTTACACAAGAACCATCTACAGTTTCAGTTTCAGAAAGCGCTGTGTGACGCAGCTGGTCACACTGG       | 1622 |
| <i>Poecilia latipinna</i>            | TCCTTCATCAGGTATTTTACACAAGAACCATCTACAGTTTCAGTTTCAGAAAGCGCTGTGTGACGCAGCTGGTCACACTGG      | 1622 |
| <i>Pseudopodoces humilis</i>         | TCCTTCATAAGGTATTACACCCGCACCATCTATCAGTTTCAGTTTCAGGAGGCATTTGCAAGGGCAGCTAACCATATTGG       | 1610 |
| <i>Pundamilia nyererei</i>           | TCATTTCATCAGGTACTTACACAGAACCATCTACAGTTTCAGTTTCAGAAAGCGCTCTGCGATGCGGCCGGTCACACGGG       | 1619 |
| <i>Pygocentrus nattereri</i>         | TCTTTTATCAGATACTTTACAAGGACGATATACAGTTTCAGTTTCAGGATGCACTCTGCAAGAGGCTGGCCACACTGG         | 1607 |
| <i>Python bivittatus</i>             | TCTTTTCATAAGATATTACACAAGGACCATTTATCAGTTTCAGTTTCAGAGAGGCATTTGCAAGGCTGCTGGTCACACAGG      | 1601 |
| <i>Rattus norvegicus</i>             | TCATTTCATTCGATATTACACAAGGACCATTTATCAATTCAGTTTCAGTTTCAGAAAGCTCTTTGTCAAGCAGCTAAACATGATGG | 1610 |
| <i>Scleropages formosus</i>          | TCCTTCATCAGATATTTACCAGGACTATCTACAGTTTCAGTTTCAGGCGCTGCTCTGTGAAGTTGCCGGACACACAGG         | 1619 |
| <i>Sinocyclocheilus anshuiensis</i>  | TCTTTTATCAGGTACTTTACCAGAACCATATATCAGTTTCAGTTTCAGAGGCGCTTATGTGAGGCAGCTGGCCACACTGG       | 1607 |
| <i>Xenopus tropicalis</i>            | TCATTTATTAGGTATTACACAAGAACTATTTACAGTTTCAGTTTCAGAGATGCCCTCTGCAAGGCTGCAGGTCACGTAGG       | 1616 |
| <i>Lipotes vexillifer</i>            | TCATTTCATCCGATATTACACAAGGACCATTTATCAATTCAGTTTCATGAAGCCCTTTGTCAAAACAGCTAAACATGAAGG      | 1607 |
| <i>Orcinus orca</i>                  | TCATTTCATCCGATATTACACAAGGACCATTTATCAATTCAGTTTCATGAAGCCCTTTGTCAAAACAGCTAAACATGAAGG      | 1607 |
| <i>Homo sapiens</i>                  | TCATTTCATTCGATATTACACAAGGACCATTTACCAATTCAGTTTCAGAAAGGCATTTGTCAAGCAGCTAAGCATGAAGG       | 1610 |

|                                      | 1620  | 1630     | 1640           | 1650     | 1660      | 1670      | 1680      | 1690      |               |              |          |      |      |
|--------------------------------------|-------|----------|----------------|----------|-----------|-----------|-----------|-----------|---------------|--------------|----------|------|------|
| conservation                         | ..... | .....    | .....          | .....    | .....     | .....     | .....     | .....     |               |              |          |      |      |
| <i>Callorhinchus milii</i>           | CCCAC | TACACAA  | ATGTGATATCA    | CCAACTCC | ACTAAA    | GCGGCACA  | AAGCT     | CAGTAACAT | GTCTTAAAC     | TAGGAAGTCAA  | 1696     |      |      |
| <i>Alligator mississippiensis</i>    | TCCTC | TTTACAA  | ATGTGACATTAC   | CAATTCC  | ACGGCAGCT | GGTGAC    | AAAT      | TGCGGAAC  | ATGCTTTCCT    | TGGGGAGGT    | CAC      | 1681 |      |
| <i>Anolis carolinensis</i>           | AGAGC | TTTACAA  | ATGTGACATCACT  | AAATTC   | ACAGCAGCT | GGCCAC    | AAAT      | TGCGAGAC  | ATGCTGGCCT    | TGGGGAGAT    | CAC      | 1717 |      |
| <i>Astyanax mexicanus</i>            | GCCTC | TTTACAA  | ATGTGACATCACA  | AACTCC   | ACTGAT    | GCGGGCAAC | AAACT     | TAGGGAC   | ATGCTTGAGCT   | TGGTTCGT     | CAA      | 1690 |      |
| <i>Boleophthalmus pectinirostris</i> | AGACC | TGGCCTC  | ATGTGACATCACC  | AACTCC   | ACCATAG   | CAGGAGAA  | AAGCT     | TAGGAAC   | ATGCTGGAGCT   | TGGTCGGT     | CAC      | 1702 |      |
| <i>Cynoglossus semilaevis</i>        | ACCGT | TGTCATC  | ATGTGACATTACT  | AACTCT   | AAAGAA    | GCCGGAAT  | AAACT     | TGAAGAA   | ATGTTAGCGT    | TGGGCAGGT    | CAC      | 1693 |      |
| <i>Danio rerio</i>                   | TCCCC | TTTACAA  | ATGTGACATTACAA | AACTCA   | ACCAAGCT  | GGTGAC    | AAACT     | TAGGCAT   | ATGCTTGAGTT   | TAGGCCGAT    | CCA      | 1687 |      |
| <i>Esox lucius</i>                   | GCCCT | TGTTCCAG | TGTGACATCACC   | AACTCT   | ACAGAT    | GCAGGGCAC | AAGCTT    | AAGACG    | ATGCTGGAATT   | TCGGAAGGGCTA |          | 1699 |      |
| <i>Fundulus heteroclitus</i>         | TGATT | TGTCCTC  | ATGCGACATCACT  | TGGCTCC  | AAGGAA    | GCTGGAACC | AAGCT     | TAGAAAC   | ATGTTAGAGCT   | TGGGGAGGT    | CCC      | 1705 |      |
| <i>Gekko japonicus</i>               | TCCCC | TTTACGA  | ATGTGACATTACT  | AAATCA   | ACCGCT    | GCTGGCCAC | AAGTT     | TATGGAAC  | ATGCTTACCT    | TGGGGAGAT    | CTG      | 1690 |      |
| <i>Haplochromis burtoni</i>          | CGACC | TGTCCTG  | ATGTGACATCACT  | AAATTC   | ATCGAAG   | CAGGAACC  | AAGCT     | TAGGAAT   | ATGTTAGA      | AACTTGGAA    | AGGTCTA  | 1699 |      |
| <i>Hippocampus comes</i>             | TGCCT | TGCTTCG  | TGTGACATC      | ACGGTTC  | AA        | CAGCG     | GCGAGCACC | AAGCT     | CAGGAAC       | ATGTTAGAGTT  | TGGTCGGT | CCC  | 1693 |
| <i>Ictalurus punctatus</i>           | TCCTC | TTTACAA  | ATGTGACATCACA  | AACTCC   | ACTAAT    | GCTGGCAAC | AAACT     | TAGGCAT   | ATGCTCGAGT    | TGGGCCGAT    | CAA      | 1690 |      |
| <i>Larimichthys crocea</i>           | TGCCT | TGCTTCA  | ATGTGACATTACT  | TGGCTCT  | AAAGAA    | GCAGGAACC | AAACT     | TAGGAAT   | ATGTTAGAGCT   | TGGGAAGGT    | TCT      | 1696 |      |
| <i>Lates calcarifer</i>              | TGCCT | TGCTAAA  | ATGCGACATCACT  | TGGTTCT  | ACCACAG   | CGGGAGCC  | AAGCT     | TAGGGAT   | ATGTTAGAGCT   | TGGGAAGGT    | CCC      | 1699 |      |
| <i>Latimeria chalumnae</i>           | GCCAC | TTTACAA  | ATGTGACATTTCC  | AAATCC   | ACTGCC    | GCTGGCAAG | AAACT     | TACAAGAC  | ATGATGAAAT    | TAGGAAGCT    | CTA      | 1828 |      |
| <i>Lepisosteus oculatus</i>          | ACCTT | TATATA   | AGTGTGACATA    | AACTCC   | ACAGAG    | GCAGGTGCA | AAACT     | TGAAGCA   | ATGCTTGAGT    | TAGGAAGAT    | CAG      | 1690 |      |
| <i>Macaca fascicularis</i>           | CCCTC | TGCACAA  | ATGTGACATCTCAA | AACTCT   | ACAGAAGCT | GGACAG    | AAAT      | TGCTCAAT  | ATGCTGAAGCT   | TGGAAAT      | CAG      | 1690 |      |
| <i>Manacus vitellinus</i>            | CCCTC | TTTACAA  | ATGTGATATA     | AACTCC   | ACTGCA    | GCTGGTGAG | AAGCT     | TAGACAA   | ATGCTGTCATT   | TAGGCAGAT    | CCA      | 1696 |      |
| <i>Mus musculus</i>                  | TTCTC | TGCACAA  | ATGTGACATCTCAA | AAATTC   | ACTGAA    | GCTGGGCAG | AAGTT     | TGCTCAAG  | ATGCTGAGTCT   | TGGAAAT      | TAG      | 1690 |      |
| <i>Neolamprologus brichardi</i>      | CGACC | TGTCCTG  | ATGTGACATCACT  | AAATTC   | ATCGAAG   | CAGGAACC  | AAGCT     | TAGGAAT   | ATGTTAGA      | AACTTGGAA    | AGGTCTA  | 1699 |      |
| <i>Oncorhynchus mykiss</i>           | ACCCT | TATTCAAG | TGTGACATCACC   | AACTCT   | ACAGCA    | GCGGGGAC  | AAGCT     | TAGGACG   | ATGCTGGAGT    | TGGGAGGT     | CAA      | 1702 |      |
| <i>Oreochromis niloticus</i>         | CGACT | TGTCGAA  | ATGTGACATCACT  | AAATTC   | ATGGAAG   | GCAGGAACC | AAGCT     | TAGGAAT   | ATGTTAGA      | AACTTGGAA    | AGGTCTA  | 1699 |      |
| <i>Poecilia formosa</i>              | TGACT | TGTCCTC  | ATGTGACATCACT  | TGGTTCC  | AAGGAA    | GCAGGAACA | AAGCT     | TAGAAA    | ACATGCTGGAGCT | TGGGAGGT     | CTG      | 1702 |      |
| <i>Poecilia latipinna</i>            | TGACT | TGTCCTC  | ATGTGACATCACT  | TGGTTCC  | AAGGAA    | GCAGGAACA | AAGCT     | TAGAAA    | ACATGCTGGAGCT | TGGGAGGT     | CTG      | 1702 |      |
| <i>Pseudopodoces humilis</i>         | CCCTC | TTTACAA  | ATGTGACATTACC  | AACTCC   | ACTGCA    | GCTGGGCAG | AAACT     | TAGACAG   | TGCTGGCAG     | TAGGGAGAT    | CCA      | 1690 |      |
| <i>Pundamilia nyererei</i>           | CGACC | TGTCCTG  | ATGTGACATCACT  | AAATTC   | ATGGAAG   | CAGGAACC  | AAGCT     | TAGGAAT   | ATGTTAGA      | AACTTGGAA    | AGGTCTA  | 1699 |      |
| <i>Pygocentrus nattereri</i>         | CCCAC | TCTACA   | AGTGTGACATC    | AACTCC   | ACAAA     | GCGGCAAC  | AAACT     | TAGGCAG   | ATGCTTGAGCT   | TGGTTCGT     | CAA      | 1687 |      |
| <i>Python bivittatus</i>             | GGAAC | TTTACAA  | ATGTGACATTTCT  | AAATTC   | AAAGCT    | GCTGGACAG | ATCTT     | TAGGAAG   | ATGCTTGCTTT   | TGGTAGCT     | CTC      | 1681 |      |
| <i>Rattus norvegicus</i>             | CCCAC | TACACAA  | ATGTGACATCTCAA | AAATTC   | ACTGAA    | GCTGGGCAG | AAGTT     | TGCTCAAT  | ATGCTGAGTCT   | TGGAAACT     | CAG      | 1690 |      |
| <i>Scleropages formosus</i>          | ACCTC | TATTCAAG | TGCGACATCACC   | AAATTC   | ACAGCA    | GCTGGCAAT | AAACT     | TACGGGCC  | ATGCTGGAGT    | TAGGAAAT     | CCA      | 1699 |      |
| <i>Sinocyclocheilus anshuiensis</i>  | TCCCC | TTTATA   | ATGCGACATTACA  | AACTCA   | ACCAAAG   | GCTGGTAAC | AAACT     | TGGGCAT   | ATGCTTGAGT    | TAGGCAGAT    | CTT      | 1687 |      |
| <i>Xenopus tropicalis</i>            | TCCAC | TCCACAA  | ATGTGACATTACT  | AACTCA   | AAAGAA    | GCTGGAGCA | AAACT     | TAGAGCT   | ATGTTGGAGCT   | TGGCAAAG     | CTA      | 1696 |      |
| <i>Lipotes vexillifer</i>            | TCCCC | TGTACAA  | ATGTGATATCTCG  | AAATTC   | ACCGAA    | GCTGGGCAG | AGGCT     | TGCTCCAA  | ATGCTGCACCT   | TGGGAAAT     | CAG      | 1687 |      |
| <i>Orcinus orca</i>                  | TCCCC | TGTACAA  | ATGTGATATCTCG  | AAATTC   | ACCGAA    | GCTGGGCAG | AGGCT     | TGCTCCAA  | ATGCTGCACCT   | TGGGAAAT     | CAG      | 1687 |      |
| <i>Homo sapiens</i>                  | CCCTC | TGCACAA  | ATGTGACATCTCAA | AACTCT   | ACAGAAG   | GCTGGACAG | AAACT     | TGTTCAAT  | ATGCTGAGGCT   | TGGAAAT      | CAG      | 1690 |      |

|              | 1700                                                                                                                                                                                                                                                                                                                                                                                                                                                                                                                                                                                                                                                                                                                                                                                                                                                                                                                                                                                                                                                                                                                                                                                                                                                                                                                                                                                                                                                                                                                                                                                                                                                                                                                                                                                                                                                                                                                                                                                                                                                                                                                                                                                                                                                                                                                                                                                                                                                                                                                                                                                                                                                                                                                                                                                                                                                                                                                                                                                                                                                                                                                                                                                                                                                                                                                                                                                                                                                                                                                                                                                                                                                                                                                                                                                                                                                                                                                                                                                                                                                                                                                                                                                                                                                                                                                                                                                                                                                                                                                                                                                                                                                                                                                                                                                                                                                                                                                                                                                                                                                                                                                                                                                                                                                                                                                                                                                                                                                                                                                                                                                                                                                                                                                                                                                                                                                                                                                                                                                                                                                                                                                                                                                                                                                                                                                                                                                                                                                                                                                                                                                                                                                                                                                                                                                                                                                                                                                                                                                                                                                                                                                                                                                                                                                                                                                                                                                                                                                                                                                                                                                                                                                                                                                                                                                                                                                                                                                                                                                                                                                                                                                                                                                                                                                                                                                                                                                                                                                                                                                                                                                                                                                                                                                                                                                                                                                                                                                                                                                                                                                                                                                                                                                                                                                                                                                                                                                                                                                                                                                                                                                                                                                                                                                                                                                                                                                                                                                                                                                                                                                                                                                                                                                                                                                                                                                                                                                                                                                                                                                                                                                                                                                                                                                                                                                                                                                                                                                                                                                                                                                                                                                                                                                                                                                                                                                                                                                                                                                                                                                                                                                                                                                                                                                                                                                                                                                                                                                                                                                                                                                                                                                                                                                                                                                                                                                                                                                                                                                                                                                                                                                                                                                                                                                                                                                            | 1710 | 1720 | 1730 | 1740 | 1750 | 1760 | 1770 |  |
|--------------|-------------------------------------------------------------------------------------------------------------------------------------------------------------------------------------------------------------------------------------------------------------------------------------------------------------------------------------------------------------------------------------------------------------------------------------------------------------------------------------------------------------------------------------------------------------------------------------------------------------------------------------------------------------------------------------------------------------------------------------------------------------------------------------------------------------------------------------------------------------------------------------------------------------------------------------------------------------------------------------------------------------------------------------------------------------------------------------------------------------------------------------------------------------------------------------------------------------------------------------------------------------------------------------------------------------------------------------------------------------------------------------------------------------------------------------------------------------------------------------------------------------------------------------------------------------------------------------------------------------------------------------------------------------------------------------------------------------------------------------------------------------------------------------------------------------------------------------------------------------------------------------------------------------------------------------------------------------------------------------------------------------------------------------------------------------------------------------------------------------------------------------------------------------------------------------------------------------------------------------------------------------------------------------------------------------------------------------------------------------------------------------------------------------------------------------------------------------------------------------------------------------------------------------------------------------------------------------------------------------------------------------------------------------------------------------------------------------------------------------------------------------------------------------------------------------------------------------------------------------------------------------------------------------------------------------------------------------------------------------------------------------------------------------------------------------------------------------------------------------------------------------------------------------------------------------------------------------------------------------------------------------------------------------------------------------------------------------------------------------------------------------------------------------------------------------------------------------------------------------------------------------------------------------------------------------------------------------------------------------------------------------------------------------------------------------------------------------------------------------------------------------------------------------------------------------------------------------------------------------------------------------------------------------------------------------------------------------------------------------------------------------------------------------------------------------------------------------------------------------------------------------------------------------------------------------------------------------------------------------------------------------------------------------------------------------------------------------------------------------------------------------------------------------------------------------------------------------------------------------------------------------------------------------------------------------------------------------------------------------------------------------------------------------------------------------------------------------------------------------------------------------------------------------------------------------------------------------------------------------------------------------------------------------------------------------------------------------------------------------------------------------------------------------------------------------------------------------------------------------------------------------------------------------------------------------------------------------------------------------------------------------------------------------------------------------------------------------------------------------------------------------------------------------------------------------------------------------------------------------------------------------------------------------------------------------------------------------------------------------------------------------------------------------------------------------------------------------------------------------------------------------------------------------------------------------------------------------------------------------------------------------------------------------------------------------------------------------------------------------------------------------------------------------------------------------------------------------------------------------------------------------------------------------------------------------------------------------------------------------------------------------------------------------------------------------------------------------------------------------------------------------------------------------------------------------------------------------------------------------------------------------------------------------------------------------------------------------------------------------------------------------------------------------------------------------------------------------------------------------------------------------------------------------------------------------------------------------------------------------------------------------------------------------------------------------------------------------------------------------------------------------------------------------------------------------------------------------------------------------------------------------------------------------------------------------------------------------------------------------------------------------------------------------------------------------------------------------------------------------------------------------------------------------------------------------------------------------------------------------------------------------------------------------------------------------------------------------------------------------------------------------------------------------------------------------------------------------------------------------------------------------------------------------------------------------------------------------------------------------------------------------------------------------------------------------------------------------------------------------------------------------------------------------------------------------------------------------------------------------------------------------------------------------------------------------------------------------------------------------------------------------------------------------------------------------------------------------------------------------------------------------------------------------------------------------------------------------------------------------------------------------------------------------------------------------------------------------------------------------------------------------------------------------------------------------------------------------------------------------------------------------------------------------------------------------------------------------------------------------------------------------------------------------------------------------------------------------------------------------------------------------------------------------------------------------------------------------------------------------------------------------------------------------------------------------------------------------------------------------------------------------------------------------------------------------------------------------------------------------------------------------------------------------------------------------------------------------------------------------------------------------------------------------------------------------------------------------------------------------------------------------------------------------------------------------------------------------------------------------------------------------------------------------------------------------------------------------------------------------------------------------------------------------------------------------------------------------------------------------------------------------------------------------------------------------------------------------------------------------------------------------------------------------------------------------------------------------------------------------------------------------------------------------------------------------------------------------------------------------------------------------------------------------------------------------------------------------------------------------------------------------------------------------------------------------------------------------------------------------------------------------------------------------------------------------------------------------------------------------------------------------------------------------------------------------------------------------------------------------------------------------------------------------------------------------------------------------------------------------------------------------------------------------------------------------------------------------------------------------------------------------------------------------------------------------------------------------------------------------------------------------------------------------------------------------------------------------------------------------------------------------------------------------------------------------------------------------------------------------------------------------------------------------------------------------------------------------------------------------------------------------------------------------------------------------------------------------------------------------------------------------------------------------------------------------------------------------------------------------------------------------------------------------------------------------------------------------------------------------------------------------------------------------------------------------------------------------------------------------------------------------------------------------------------------------------------------------------------------------------------------------------------------------------------------------------------------------------------------------------------------------------------------------------------------------------------------------------------------------------------------------------------------------------------------------------------------------------------------------------------------------------------------------------------------------------------------------------------------------------------------------------------------------------------|------|------|------|------|------|------|------|--|
| conservation | ●●●●●●●●●●●●●●●●●●●●●●●●●●●●●●●●●●●●●●●●●●●●●●●●●●●●●●●●●●●●●●●●●●●●●●●●●●●●●●●●●●●●●●●●●●●●●●●●●●●●●●●●●●●●●●●●●●●●●●●●●●●●●●●●●●●●●●●●●●●●●●●●●●●●●●●●●●●●●●●●●●●●●●●●●●●●●●●●●●●●●●●●●●●●●●●●●●●●●●●●●●●●●●●●●●●●●●●●●●●●●●●●●●●●●●●●●●●●●●●●●●●●●●●●●●●●●●●●●●●●●●●●●●●●●●●●●●●●●●●●●●●●●●●●●●●●●●●●●●●●●●●●●●●●●●●●●●●●●●●●●●●●●●●●●●●●●●●●●●●●●●●●●●●●●●●●●●●●●●●●●●●●●●●●●●●●●●●●●●●●●●●●●●●●●●●●●●●●●●●●●●●●●●●●●●●●●●●●●●●●●●●●●●●●●●●●●●●●●●●●●●●●●●●●●●●●●●●●●●●●●●●●●●●●●●●●●●●●●●●●●●●●●●●●●●●●●●●●●●●●●●●●●●●●●●●●●●●●●●●●●●●●●●●●●●●●●●●●●●●●●●●●●●●●●●●●●●●●●●●●●●●●●●●●●●●●●●●●●●●●●●●●●●●●●●●●●●●●●●●●●●●●●●●●●●●●●●●●●●●●●●●●●●●●●●●●●●●●●●●●●●●●●●●●●●●●●●●●●●●●●●●●●●●●●●●●●●●●●●●●●●●●●●●●●●●●●●●●●●●●●●●●●●●●●●●●●●●●●●●●●●●●●●●●●●●●●●●●●●●●●●●●●●●●●●●●●●●●●●●●●●●●●●●●●●●●●●●●●●●●●●●●●●●●●●●●●●●●●●●●●●●●●●●●●●●●●●●●●●●●●●●●●●●●●●●●●●●●●●●●●●●●●●●●●●●●●●●●●●●●●●●●●●●●●●●●●●●●●●●●●●●●●●●●●●●●●●●●●●●●●●●●●●●●●●●●●●●●●●●●●●●●●●●●●●●●●●●●●●●●●●●●●●●●●●●●●●●●●●●●●●●●●●●●●●●●●●●●●●●●●●●●●●●●●●●●●●●●●●●●●●●●●●●●●●●●●●●●●●●●●●●●●●●●●●●●●●●●●●●●●●●●●●●●●●●●●●●●●●●●●●●●●●●●●●●●●●●●●●●●●●●●●●●●●●●●●●●●●●●●●●●●●●●●●●●●●●●●●●●●●●●●●●●●●●●●●●●●●●●●●●●●●●●●●●●●●●●●●●●●●●●●●●●●●●●●●●●●●●●●●●●●●●●●●●●●●●●●●●●●●●●●●●●●●●●●●●●●●●●●●●●●●●●●●●●●●●●●●●●●●●●●●●●●●●●●●●●●●●●●●●●●●●●●●●●●●●●●●●●●●●●●●●●●●●●●●●●●●●●●●●●●●●●●●●●●●●●●●●●●●●●●●●●●●●●●●●●●●●●●●●●●●●●●●●●●●●●●●●●●●●●●●●●●●●●●●●●●●●●●●●●●●●●●●●●●●●●●●●●●●●●●●●●●●●●●●●●●●●●●●●●●●●●●●●●●●●●●●●●●●●●●●●●●●●●●●●●●●●●●●●●●●●●●●●●●●●●●●●●●●●●●●●●●●●●●●●●●●●●●●●●●●●●●●●●●●●●●●●●●●●●●●●●●●●●●●●●●●●●●●●●●●●●●●●●●●●●●●●●●●●●●●●●●●●●●●●●●●●●●●●●●●●●●●●●●●●●●●●●●●●●●●●●●●●●●●●●●●●●●●●●●●●●●●●●●●●●●●●●●●●●●●●●●●●●●●●●●●●●●●●●●●●●●●●●●●●●●●●●●●●●●●●●●●●●●●●●●●●●●●●●●●●●●●●●●●●●●●●●●●●●●●●●●●●●●●●●●●●●●●●●●●●●●●●●●●●●●●●●●●●●●●●●●●●●●●●●●●●●●●●●●●●●●●●●●●●●●●●●●●●●●●●●●●●●●●●●●●●●●●●●●●●●●●●●●●●●●●●●●●●●●●●●●●●●●●●●●●●●●●●●●●●●●●●●●●●●●●●●●●●●●●●●●●●●●●●●●●●●●●●●●●●●●●●●●●●●●●●●●●●●●●●●●●●●●●●●●●●●●●●●●●●●●●●●●●●●●●●●●●●●●●●●●●●●●●●●●●●●●●●●●●●●●●●●●●●●●●●●●●●●●●●●●●●●●●●●●●●●●●●●●●●●●●●●●●●●●●●●●●●●●●●●●●●●●●●●●●●●●●●●●●●●●●●●●●●●●●●●●●●●●●●●●●●●●●●●●●●●●●●●●●●●●●●●●●●●●●●●●●●●●●●●●●●●●●●●●●●●●●●●●●●●●●●●●●●●●●●●●●●●●●●●●●●●●●●●●●●●●●●●●●●●●●●●●●●●●●●●●●●●●●●●●●●●●●●●●●●●●●●●●●●●●●●●●●●●●●●●●●●●●●●●●●●●●●●●●●●●●●●●●●●●●●●●●●●●●●●●●●●●●●●●●●●●●●●●●●●●●●●●●●●●●●●●●●●●●●●●●●●●●●●●●●●●●●●●●●●●●●●●●●●●●●●●●●●●●●●●●●●●●●●●●●●●●●●●●●●●●●●●●●●●●●●●●●●●●●●●●●●●●●●●●●●●●●●●●●●●●●●●●●●●●●●●●●●●●●●●●●●●●●●●●●●●●●●●●●●●●●●●●●●●●●●●●●●●●●●●●●●●●●●●●●●●●●●●●●●●●●●●●●●●●●●●●●●●●●●●●●●●●●●●●●●●●●●●●●●●●●●●●●●●●●●●●●●●●●●●●●●●●●●●●●●●●●●●●●●●●●●●●●●●●●●●●●●●●●●●●●●●●●●●●●●●●●●●●●●●●●●●●●●●●●●●●●●●●●●●●●●●●●●●●●●●●●●●●●●●●●●●●●●●●●●●●●●●●●●●●●●●●●●●●●●●●●●●●●●●●●●●●●●●●●●●●●●●●●●●●●●●●●●●●●●●●●●●●●●●●●●●●●●●●●●●●●●●●●●●●●●●●●●●●●●●●●●●●●●●●●●●●●●●●●●●●●●●●●●●●●●●●●●●●●●●●●●●●●●●●●●●●●●●●●●●●●●●●●●●●●●●●●●●●●●●●●●●●●●●●●●●●●●●●●●●●●●●●●●●●●●●●●●●●●●●●●●●●●●●●●●●●●●●●●●●●●●●●●●●●●●●●●●●●●●●●●●●●●●●●●●●●●●●●●●●●●●●●●●●●●●●●●●●●●●●●●●●●●●●●●●●●●●●●●●●●●●●●●●●●●●●●●●●●●●●●●●●●●●●●●●●●●●●●●●●●●●●●●●●●●●●●●●●●●●●●●●●●●●●●●●●●●●●●●●●●●●●●●●●●●●●●●●●●●●●●●●●●●●●●●●●●●●●●●●●●●●●●●●●●●●●●●●●●●●●●●●●●●●●●●●●●●●●●●●●●●●●●●●●●●●●●●●●●●●●●●●●●●●●●●●●●●●●●●●●●●●●●●●●●●●●●●●●●●●●●●●●●●●●●●●●●●●●●●●●●●●●●●●●●●●●●●●●●●●●●●●●●●●●●●●●●●●●●●●●●●●●●●●●●●●●●●●●●●●●●●●●●●●●●●●●●●●●●●●●●●●●●●●●●●●●●●●●●●●●●●●●●●●●●●●●●●●●●●●●●●●●●●●●●●●●●●●●●●●●●●●●●●●●●●●●●●●●●●●●●●●●●●●●●●●●●●●●●●●●●●●●●●●●●●●●●●●●●●●●●●●●●●●●●●●●●●●●●●●●●●●●●●●●●●●●●●●●●●●●●●●●●●●●●●●●●●●●●●●●●●●●●●●●●●●●●●●●●●●●●●●●●●●●●●●●●●●●●●●●●●●●●●●●●●●●●●●●●●●●●●●●●●●●●●●●●●●●●●●●●●●●●●●●●●●●●●●●●●●●●●●●●●●●●●●●●●●●●●●●●●●●●●●●●●●●●●●●●●●●●●●●●●●●●●●●●●●●●●●●●●●●●●●●●●●●●●●●●●●●●●●●●●●●●●●●●●●●●●●●●●●●●●●●●●●●●●●●●●●●●●●●●●●●●●●●●●●●●●●●●●●●●●●●●●●●●●●●●●●●●●●●●●●●●●●●●●●●●●●●●●●●●●●●●●●●●●●●●●●●●●●●●●●●●●●●●●●●●●●●●●●●●●●●●●●●●●●●●●●●●●●●●●●●●●●●●●●●●●●●●●●●●●●●●●●●●●●●●●●●●●●●●●●●●●●●●●●●●●●●●●●●●●●●●●●●●●●●●●●●●●●●●●●●●●●●●●●●●●●●●●●●●●●●●●●●●●●●●●●●●●●●●●●●●●●●●●●●●●●●●●●●●●●●●●●●●●●●●●●●●●●●●●●●●●●●●●●●●●●●●●●●●●●●●●●●●●●●●●●●●●●●●●●●●●●●●●●●●●●●●●●●●●●●●●●●●●●●●●●●●●●●●●●●●●●●●●●●●●●●●●●●●●●●●●●●●●●●●●●●●●●●●●●●●●●●●●●●●●●●●●●●●●●●●●●●●●●●●●●●●●●●●●●●●●●●●●●●●●●●●●●●●●●●●●●●●●●●●●●●●●●●●●●●●●●●●●●●●●●●●●●●●●●●●●●●●●●●●●●●●●●●●●●●●●●●●●●●●●●●●●●●●●●●●●●●●●●●●●●●●●●●●●●●●●●●●●●●●●●●●●●●●●●●●●●●●●●●●●●●●●●●●●●●●●●●●●●●●●●●●●●●●●●●●●●●●●●●●●●●●●●●●●●●●●●●●●●●●●●●●●●●●●●●●●●●●●●●●●●●●●●●●●●●●●●●●●●●●●●●●●●●●●●●●●●●●●●●●●●●●●●●●●●●●●●●●●●●●●●●●●●●●●●●●●●●●●●●●●●●●●●●●●●●●●●●●●●●●●●●●●●●●●●●●●●●●●●●●●●●●●●●●●●●●●●●●●●●●●●●●●●●●●●●●●●●●●●●●●●●●●●●●●●●●●●●●●●●●●●●●●●●●●●●●●●●●●●●●●●●●●●●●●●●●●●●●●●●●●●●●●●●●●●●●●●●●●●●●●●●●●●●●●●●●●●●●●●●●●●●●●●●●●●●●●●●●●●●●●●●●●●●●●●●●●●●●●●●●●●●●●●●●●●●●●●●●●●●●●●●●●●●●●●●●●●●●●●●●●●●●●●●●●●●●●●●●●●●●●●●●●●●●●●●●●●●●●●●●●●●●●●●●●●●●●●●●●●●●●●●●●●●●●●●●●●●●●●●●●●●●●●●●●●●●●●●●●●●●●●●●●●●●●●●●●●●●●●●●●●●●●●●●●●●●●●●●●●●●●●●●●●●●●●●●●●●●●●●●●●●●●●●●●●●●●●●●●●●●●●●●●●●●●●●●●●●●●●●●●●●●●●●●●●●●●●●●●●●●●●●●●●●●●●●●●●●●●●●●●●●●●●●●●●●●●●●●●●●●●●●●●●●●●●●●●●●●●●●●●●●●●●●●●●●●●●●●●●●●●●●●●●●●●●●●●●●●●●●●●●●●●●●●●●●●●●●●●●●●●●●●●●●●●●●●●●●●●●●●●●●●●●●●●●●●●●●●●●●●●●●●●●●●●●●●●●●●●●●●●●●●●●●●●●●●●●●●●●●●●●●●●●●●●●●●●●●●●●●●●●●●●●●●●●●●●●●●●●●●●●●●●●●●●●●●●●●●●●●●●●●●●●●●●●●●●●●●●●●●●●●●●●●●●●●●●●●●●●●●●●●●●●●●●●●●●●●●●●●●●●●●●●●●●●●●●●●●●●●●●●●●●●●●●●●●●●●●●●●●●●●●●●●●●●●●●●●●●●●●●●●●●●●●●●●●●●●●●●●●●●●●●●●●●●●●●●●●●●●●●●●●●●●●●●●●●●●●●●●●●●●●●●●●●●●●●●●●●●●●●●●●●●●●●●●●●●●●●●●●●●●●●●●●●●●●●●●●●●●●●●●●●●●●●●●●●●●●●●●●●●●●●●●●●●●●●●●●●●●●●●●●●●●●●●●●●●●●●●●●●●●●●●●●●●●●●●●●●●●●●●●●●●●●●●●●●●●●●●●●●●●●●●●●●●●●●●●●●●●●●●●●●●●●●●●●●●●●●●●●●●●●●●●●●●●●●●●●●●●●●●●●●●●●●●●●●●●●●●●●●●●●●●●●●●●●●●●●●●●●●●●●●●●●●●●●●●●●●●●●●●●●●●●●●●●●●●●●●●●●●●●●●●●●●●●●●●●●●●●●●●●●●●●●●●●●●●●●●●●●●●●●●●●●●●●●●●●●●●●●●●●●●●●●●●●●●●●●●●●●●●●●●●●●●●●●●●●●●●●●●●●●●●●●●●●●●●●●●●●●●●●●●●●●●●●●●●●●●●●●●●●●●●●●●●●●●●●●●●●●●●●●●●●●●●●●●●●●●●●●●●●●●●●●●●●●●●●●●●●●●●●●●●●●●●●●●●●●●●●●●●●●●●●●●●●●●●●●●●●●●●●●●●●●●●●●●●●●●●●●●●●●●●●●●●●●●●●●●●●●●●●●●●●●●●●●●●●●●●●●●●●●●●●●●●●●●●●●●●●●●●●●●●●●●●●●●●●●●●●●●●●●●●●●●●●●●●●●●●●●●●●●●●●●●●●●●●●●●●●●●●●●●●●●●●●●●●●●●●●●●●●●●●●●●●●●●●●●●●●●●●●●●●●●●●●●●●●●●●●●●●●●●●●●●●●●●●●●●●●●●●●●●●●●●●●●●●●●●●●●●●●●●●●●●●●●●●●●●●●●●●●●●●●●●●●●●●●●●●●●●●●●●●●●●●●●●●●●●●●●●●●●●●●●●●●●●●●●●●●●●●●●●●●●●●●●●●●●●●●●●●●●●●●●●●●●●●●●●●●●●●●●●●●●●●●●●●●●●●●●●●●●●●●●●●●●●●●●●●●●●●●●●●●●●●●●●●●●●●●●●●●●●●●●●●●●●●●●●●●●●●●●●●●●●●●●●●●●●●●●●●●●●●●●●●●●●●●●●●●●●●●●●●●●●●●●●●●●●●●●●●●●●●●●●●●●●●●●●●●●●●●●●●●●●●●●●●●●●●●●●●●●●●●●●●●●●●●●●●●●●●●●●●●●●●●●●●●●●●●●●●●●●●●●●●●●●●●●●●●●●●●●●●●●●●●●●●●●●●●●●●●●●●●●●●●●●●●●●●●●●●●●●●●●●●●●●●●●●●●●●●●●●●●●●●●●●●●●●●●●●●●●●●●●●●●●●●●●●●●●●●●●●●●●●●●●●●●●●●●●●●●●●●●●●●●●●●●●●●●●●●●●●●●●●●●●●●●●●●●●●●●●●●●●●●●●●●●●●●●●●●●●●●●●●●●●●●●●●●●●●●●●●●●●●●●●●●●●●●●●●●●●●●●●●●●●●●●●●●●●●●●●●●●●●●●●●●●●●●●●●●●●●●●●●●●●●●●●●●●●●●●●●●●●●●●●●●●●●●●●●●●●●●●●●●●●●●●●●●●●●●●●●●●●●●●●●●●●●●●●●●●●●●●●●●●●●●●●●●●●●●●●●●●●●●●●●●●●●●●●●●●●●●●●●●●●●●●●●●●●●●●●●●●●●●●●●●●●●●●●●●●●●●●●●●●●●●●●●●●●●●●●●●●●●●●●●●●●●●●●●●●●●●●●●●●●●●●●●●●●●●●●●●●●●●●●●●●●●●●●●●●●●●●●●●●●●●●●●●●●●●●●●●●●●●●●●●●●●●●●●●●●●●●●●●●●●●●●●●●●●●●●●●●●●●●●●●●●●●●●●●●●●●●●●●●●●●●●●●●●●●●●●●●●●●●●●●●●●●●●●●●●●●●●●●●●●●●●●●●●●●●●●●●●●●●●●●●●●●●●●●●●●●●●●●●●●●●●●●●●●●●●●●●●●●●●●●●●●●●●●●●●●●●●●●●●●●●●●●●●●●●●●●●●●●●●●●●●●●●●●●●●●●●●●●●●●●●●●●●●●●●●●●●●●●●●●●●●●●●●●●●●●●●●●●●●●●●●●●●●●●●●●●●●●●●●●●●●●●●●●●●●●●●●●●●●●●●●●●●●●●●●●●●●●●●●●●●●●●●●●●●●●●●●●●●●●●●●●●●●●●●●●●●●●●●●●●●●●●●●●●●●●●●●●●●●●●●●●●●●●●●●●●●●●●●●●●●●●●●●●●●●●●●●●●●●●●●●●●●●●●●●●●●●●●●●●●●●●●●●●●●●●●●●●●●●●●●●●●●●●●●●●●●●●●●●●●●●●●●●●●●●●●●●●●●●●●●●●●●●●●●●●●●●●●●●●●●●●●●●●●●●●●●●●●●●●●●●●●●●●●●●●●●●●●●●●●●●●●●●●●●●●●●●●●●●●●●●●●●●●●●●●●●●●●●●●●●●●●●●●●●●●●●●●●●●●●●●●●●●●●●●●●●●●●●●●●●●●●●●●●●●●●●●●●●●●●●●●●●●●●●●●●●●●●●●●●●●●●●●●●●●●●●●●●●●●●●●●●●●●●●●●●●●●●●●●●●●●●●●●●●●●●●●●●●●●●●●●●●●●●●●●●●●●●●●●●●●●●●●●●●●●●●●●●●●●●●●●●●●●●●●●●●●●●●●●●●●●●●●●●●●●●●●●●●●●●●●●●●●●●●●●●●●●●●●●●●●●●●●●●●●●●●●●●●●●●●●●●●●●●●●●●●●●●●●●●●●●●●●●●●●●●●●●●●●●●●●●●●●●●●●●●●●●●●●●●●●●●●●●●●●●●●●●●●●●●●●●●●●●●●●●●●●●●●●●●●●●●●●●●●●●●●●●●●●●●●●●●●●●●●●●●●●●●●●●●●●●●●●●●●●●●●●●●●●●●●●●●●●●●●●●●●●●●●●●●●●●●●●●●●●●●●●●●●●●●●●●●●●●●●●●●●●●●●●●●●●●●●●●●●●●●●●●●●●●●●●●●●●●●●●●●●●●●●●●●●●●●●●●●●●●●●●●●●●●●●●●●●●●●●●●●●●●●●●●●●●●●●●●●●●●●●●●●●●●●●●●●●●●●●●●●●●●●●●●●●●●●●●●●●●●●●●●●●●●●●●●●●●●●●●●●●●●●●●●●●●●●●●●●●●●●●●●●●●●●●●●●●●●●●●●●●●●●●●●●●●●●●●●●●●●●●●●●●●●●●●●●●●●●●●●●●●●●●●●●●●●●●●●●●●●●●●●●●●●●●●●●●●●●●●●●●●●●●●●●●●●●●●●●●●●●●●●●●●●●●●●●●●●●●●●●●●●●●●●●●●●●●●●●●●●●●●●●●●●●●●●●●●●●●●●●●●●●●●●●●●●●●●●●●●●●●●●●●●●●●●●●●●●●●●●●●●●●●●●●●●●●●●●●●●●●●●●●●●●●●●●●●●●●●●●●●●●●●●●●●●●●●●●●●●●●●●●●●●●●●●●●●●●●●●●●●●●●●●●●●●●●●●●●●●●●●●●●●●●●●●●●●●●●●●●●●●●●●●●●●●●●●●●●●●●●●●●●●●●●●●●●●●●●●●●●●●●●●●●●●●●●●●●●●●●●●●●●●●●●●●●●●●●●●●●●●●●●●●●●●●●●●●●●●●●●●●●●●●●●●●●●●●●●●●●●●●●●●●●●●●●●●●●●●●●●●●●●●●●●●●●●●●●●●●●●●●●●●●●●●●●●●●●●●●●●●●●●●●●●●●●●●●●●●●●●●●●●●●●●●●●●●●●●●●●●●●●●●●●●●●●●●●●●●●●●●●●●●●●●●●●●●●●●●●●●●●●●●●●●●●●●●●●●●●●●●●●●●●●●●●●●●●●●●●●●●●●●●●●●●●●●●●●●●●●●●●●●●●●●●●●●●●●●●●●●●●●●●●●●●●●●●●●●●●●●●●●●●●●●●●●●●●●●●●●●●●●●●●●●●●●●●●●●●●●●●●●●●●●●●●●●●●●●●●●●●●●●●●●●●●●●●●●●●●●●●●●●●●●●●●●●●●●●●●●●●●●●●●●●●●●●●●●●●●●●●●●●●●●●●●●●●●●●●●●●●●●●●●●●●●●●●●●●●●●●●●●●●●●●●●●●●●●●●●●●●●●●●●●●●●●●●●●●●●●●●●●●●●●●●●●●●●●●●●●●●●●●●●●●●●●●●●●●●●●●●●●●●●●●●●●●●●●●●●●●●●●●●●●●●●●●●●●●●●●●●●●●●●●●●●●●●●●●●●●●●●●●●●●●●●●●●●●●●●●●●●●●●●●●●●●●●●●●●●●●●●●●●●●●●●●●●●●●●●●●●●●●●●●●●●●●●●●●●●●●●●●●●●●●●●●●●●●●●●●●●●●●●●●●●●●●●●●●●●●●●●●●●●●●●●●●●●●●●●●●●●●●●●●●●●●●●●●●●●●●●●●●●●●●●●●●●●●●●●●●●●●●●●●●●●●●●●●●●●●●●●●●●●●●●●●●●●●●●●●●●●●●●●●●●●●●●●●●●●●●●●●●●●●●●●●●●●●●●●●●●●●●●●●●●●●●●●●●●●●●●●●●●●●●●●●●●●●●●●●●●●●●●●●●●●●●●●●●●●●●●●●●●●●●●●●●●●●●●●●●●●●●●●●●●●●●●●●●●●●●●●●●●●●●●●●●●●●●●●●●●●●●●●●●●●●●●●●●●●●●●●●●●●●●●●●●●●●●●●●●●●●●●●●●●●●●●●●●●●●●●●●●●●●●●●●●●●●●●●●●●●●●●●●●●●●●●●●●●●●●●●●●●●●●●●●●●●●●●●●●●●●●●●●●●●●●●●●●●●●●●●●●●●●●●●●●●●●●●●●●●●●●●●●●●●●●●●●●●●●●●●●●●●●●●●●●●●●●●●●●●●●●●●●●●●●●●●●●●●●●●●●●●●●●●●●●●●●●●●●●●●●●●●●●●●●●●●●●●●●●●●●●●●●●●●●●●●●●●●●●●●●●●●●●●●●●●●●●●●●●●●●●●●●●●●●●●●●●●●●●●●●●●●●●●●●●●●●●●●●●●●●●●●●●●●●●●●●●●●●●●●●●●●●●●●●●●●●●●●●●●●●●●●●●●●●●●●●●●●●●●●●●●●●●●●●●●●●●●●●●●●●●●●●●●●●●●●●●●●●●●●●●●●●●●●●●●●●●●●●●●●●●●●●●●●●●●●●●●●●●●●●●●●●●●●●●●●●●●●●●●●●●●●●●●●●●●●●●●●●●●●●●●●●●●●●●●●●●●●●●●●●●●●●●●●●●●●●●●●●●●●●●●●●●●●●●●●●●●●●●●●●●●●●●●●●●●●●●●●●●●●●●●●●●●●●●●●●●●●●●●●●●●●●●●●●●●●●●●●●●●●●●●●●●●●●●●●●●●●●●●●●●●●●●●●●●●●●●●●●●●●●●●●●●●●●●●●●●●●●●●●●●●●●●●●●●●●●●●●●●●●●●●●●●●●●●●●●●●●●●●●●●●●●●●●●●●●●●●●●●●●●●●●●●●●●●●●●●●●●●●●●●●●●●●●●●●●●●●●●●●●●●●●●●●●●●●●●●●●●●●●●●●●●●●●●●●●●●●●●●●●●●●●●●●●●●●●●●●●●●●●●●●●●●●●●●●●●●●●●●●●●●●●●●●●●●●●●●●●●●●●●●●●●●●●●●●●●●●●●●●●●●●●●●●●●●●●●●●●●●●●●●●●●●●●●●●●●●●●●●●●●●●●●●●●●●●●●●●●●●●●●●●●●●●●●●●●●●●●●●●●●●●●●●●●●●●●●●●●●●●●●●●●●●●●●●●●●●●●●●●●●●●●●●●●●●●●●●●●●●●●●●●●●●●●●●●●●●●●●●●●●●●●●●●●●●●●●●●●●●●●●●●●●●●●●●●●●●●●●●●●●●●●●●●●●●●●●●●●●●●●●●●●●●●●●●●●●●●●●●●●●●●●●●●●●●●●●●●●●●●●●●●●●●●●●●●●●●●●●●●●●●●●●●●●●●●●●●●●●●●●●●●●●●●●●●●●●●●●●●●●●●●●●●●●●●●●●●●●●●●●●●●●●●●●●●●●●●●●●●●●●●●●●●●●●●●●●●●●●●●●●●●●●●●●●●●●●●●●●●●●●●●●●●●●●●●●●●●●●●●●●●●●●●●●●●●●●●●●●●●●●●●●●●●●●●●●●●●●●●●●●●●●●●●●●●●●●●●●●●●●●●●●●●●●●●●●●●●●●●●●●●●●●●●●●●●●●●●●●●●●●●●●●●●●●●●●●●●●●●●●●●●●●●●●●●●●●●●●●●●●●●●●●●●●●●●●●●●●●●●●●●●●●●●●●●●●●●●●●●●●●●●●●●●●●●●●●●●●●●●●●●●●●●●●●●●●●●●●●●●●●●●●●●●●●●●●●●●●●●●●●●●●●●●●●●●●●●●●●●●●●●●●●●●●●●●●●●●●●●●●●●●●●●●●●●●●●●●●●●●●●●●●●●●●●●●●●●●●●●●●●●●●●●●●●●●●●●●●●●●●●●●●●●●●●●●●●●●●●●●●●●●●●●●●●●●●●●●●●●●●●●●●●●●●●●●●●●●●●●●●●●●●●●●●●●●●●●●●●●●●●●●●●●●●●●●●●●●●●●●●●●●●●●●●●●●●●●●●●●●●●●●●●●●●●●●●●●●●●●●●●●●●●●●●●●●●●●●●●●●●●●●●●●●●●●●●●●●●●●●●●●●●●●●●●●●●●●●●●●●●●●●●●●●●●●●●●●●●●●●●●●●●●●●●●●●●●●●●●●●●●●●●●●●●●●●●●●●●●●●●●●●●●●●●●●●●●●●●●●●●●●●●●●●●●●●●●●●●●●●●●●●●●●●●●●●●●●●●●●●●●●●●●●●●●●●●●●●●●●●●●●●●●●●●●●●●●●●●●●●●●●●●●●●●●●●●●●●●●●●●●●●●●●●●●●●●●●●●●●●●●●●●●●●●●●●●●●●●●●●●●●●●●●●●●●●●●●●●●●●●●●●●●●●●●●●●●●●●●●●●●●●●●●●●●●●●●●●●●●●●●●●●●●●●●●●●●●●●●●●●●●●●●●●●●●●●●●●●●●●●●●●●●●●●●●●●●●●●●●●●●●●●●●●●●●●●●●●●●●●●●●●●●●●●●●●●●●●●●●●●●●●●●●●●●●●●●●●●●●●●●●●●●●●●●●●●●●●●●●●●●●●●●●●●●●●●●●●●●●●●●●●●●●●●●●●●●●●●●●●●●●●●●●●●●●●●●●●●●●●●●●●●●●●●●●●●●●●●●●●●●●●●●●●●●●●●●●●●●●●●●●●●●●●●●●●●●●●●●●●●●●●●●●●●●●●●●●●●●●●●●●●●●●●●●●●●●●●●●●●●●●●●●●●●●●●●●●●●●●●●●●●●●●●●●●●●●●●●●●●●●●●●●●●●●●●●●●●●●●●●●●●●●●●●●●●●●●●●●●●●●●●●●●●●●●●●●●●●●●●●●●●●●●●●●●●●●●●●●●●●●●●●●●●●●●● |      |      |      |      |      |      |      |  |



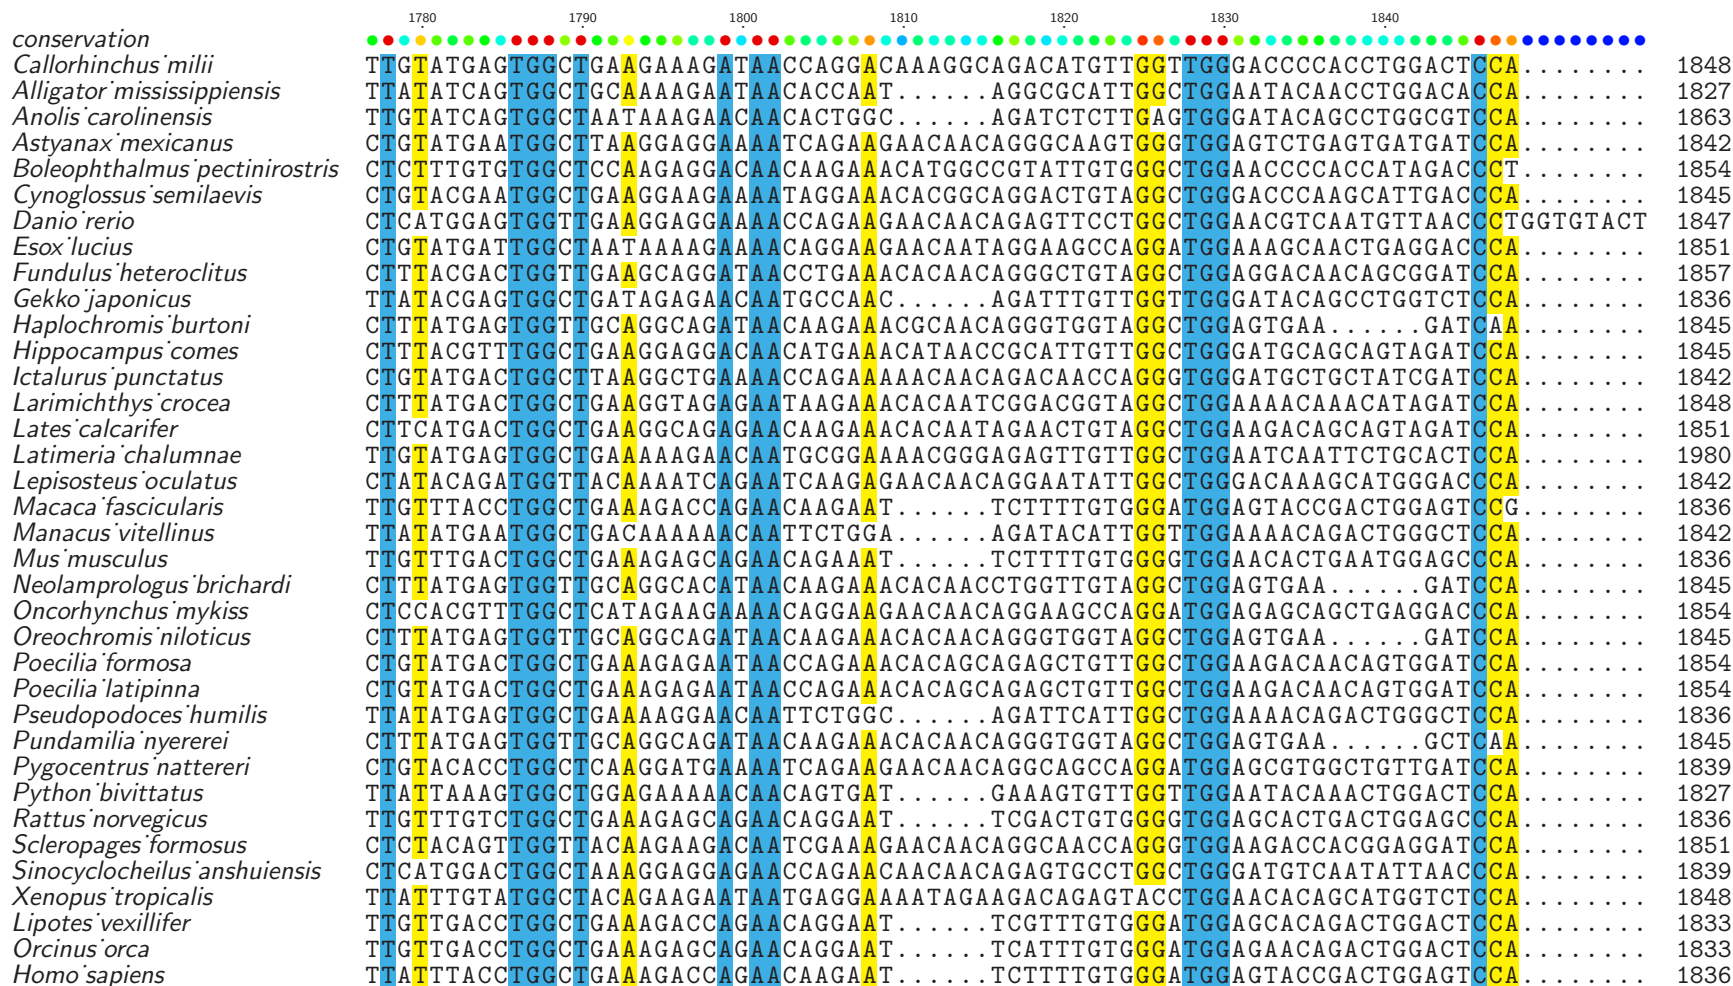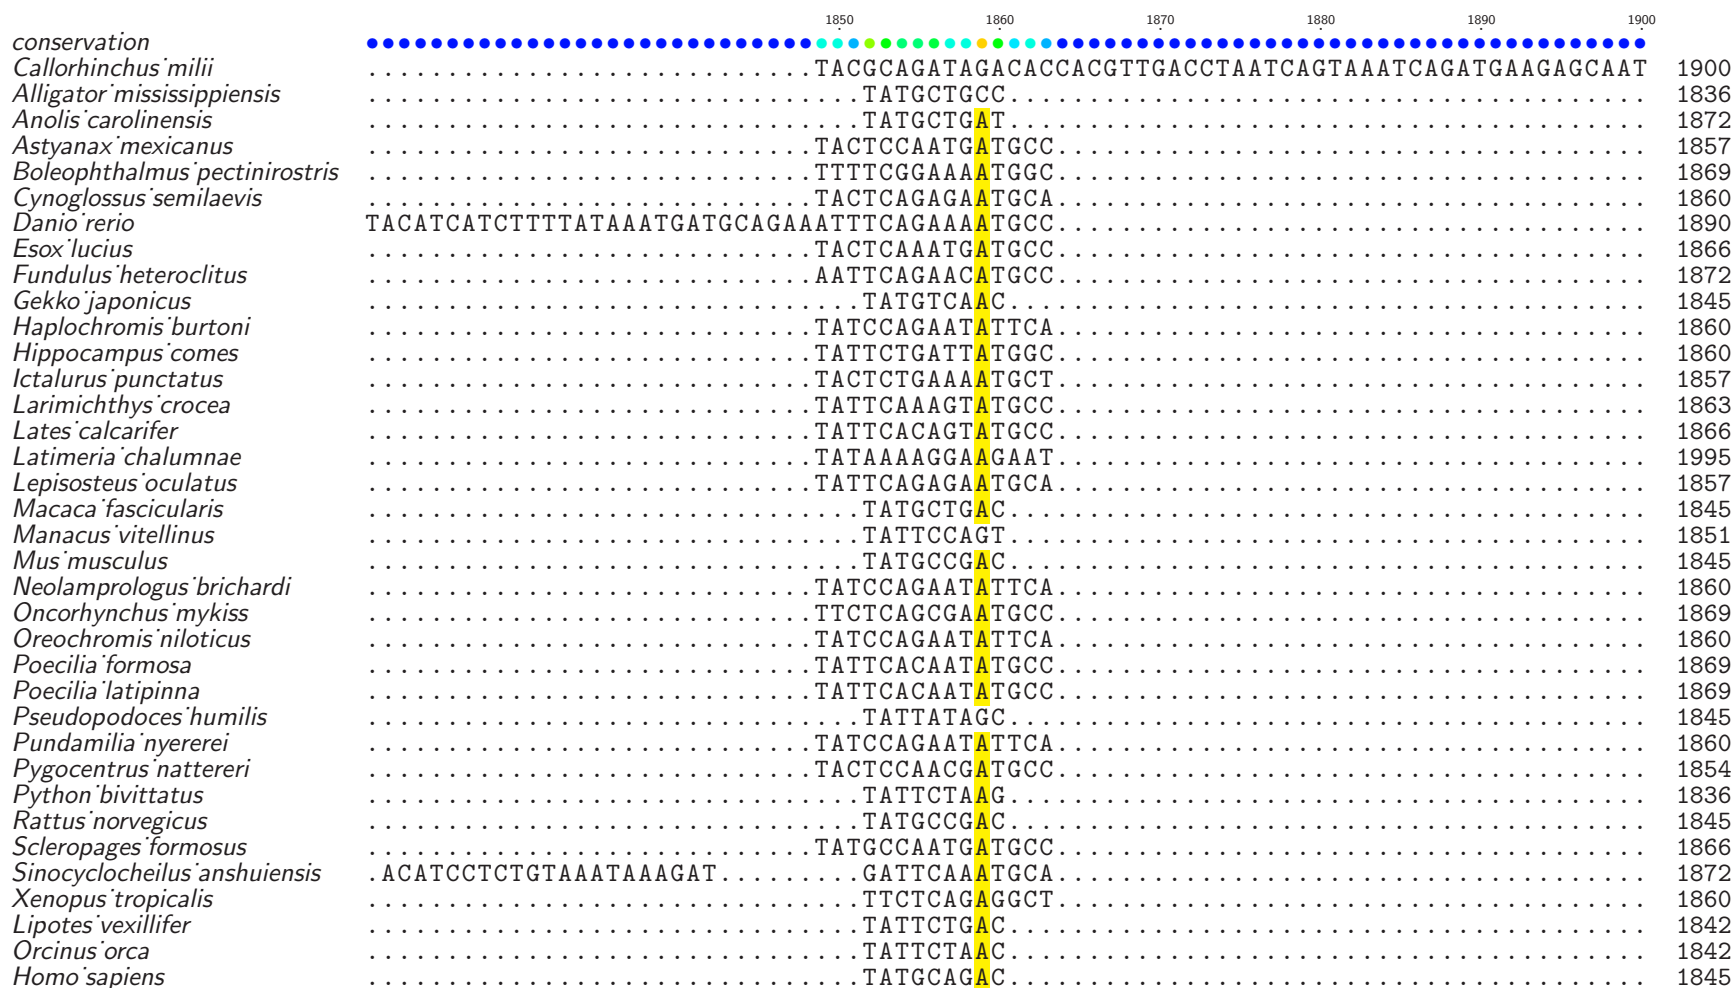

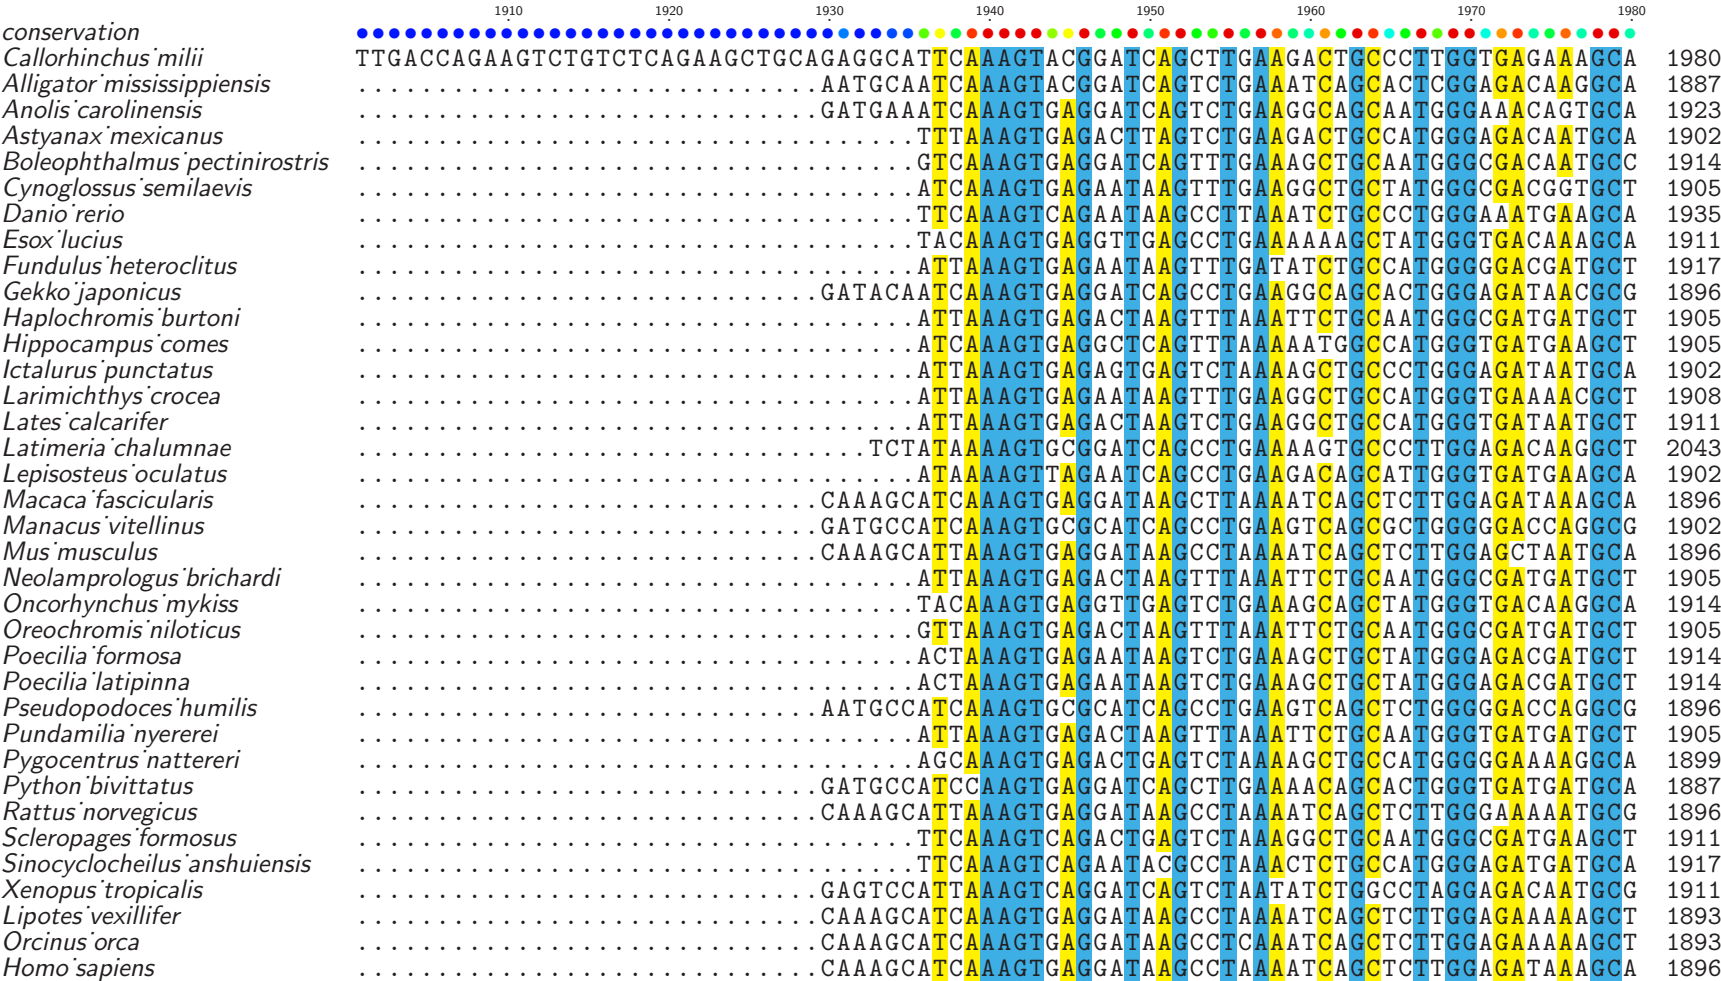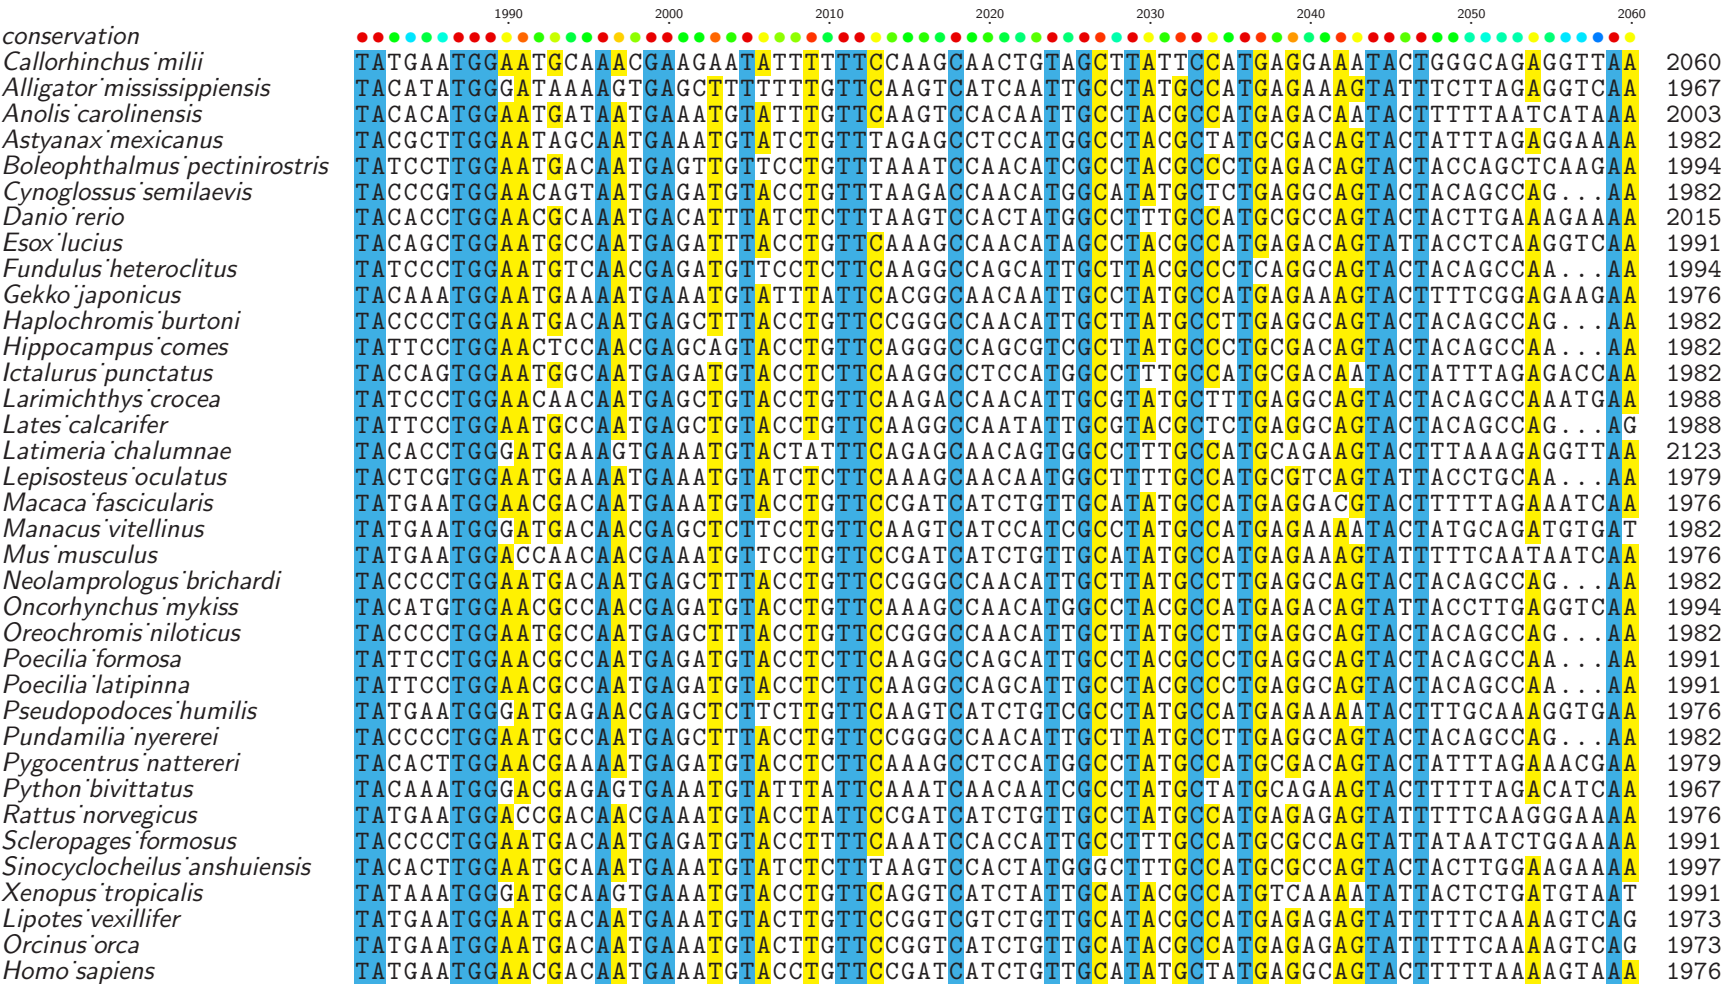



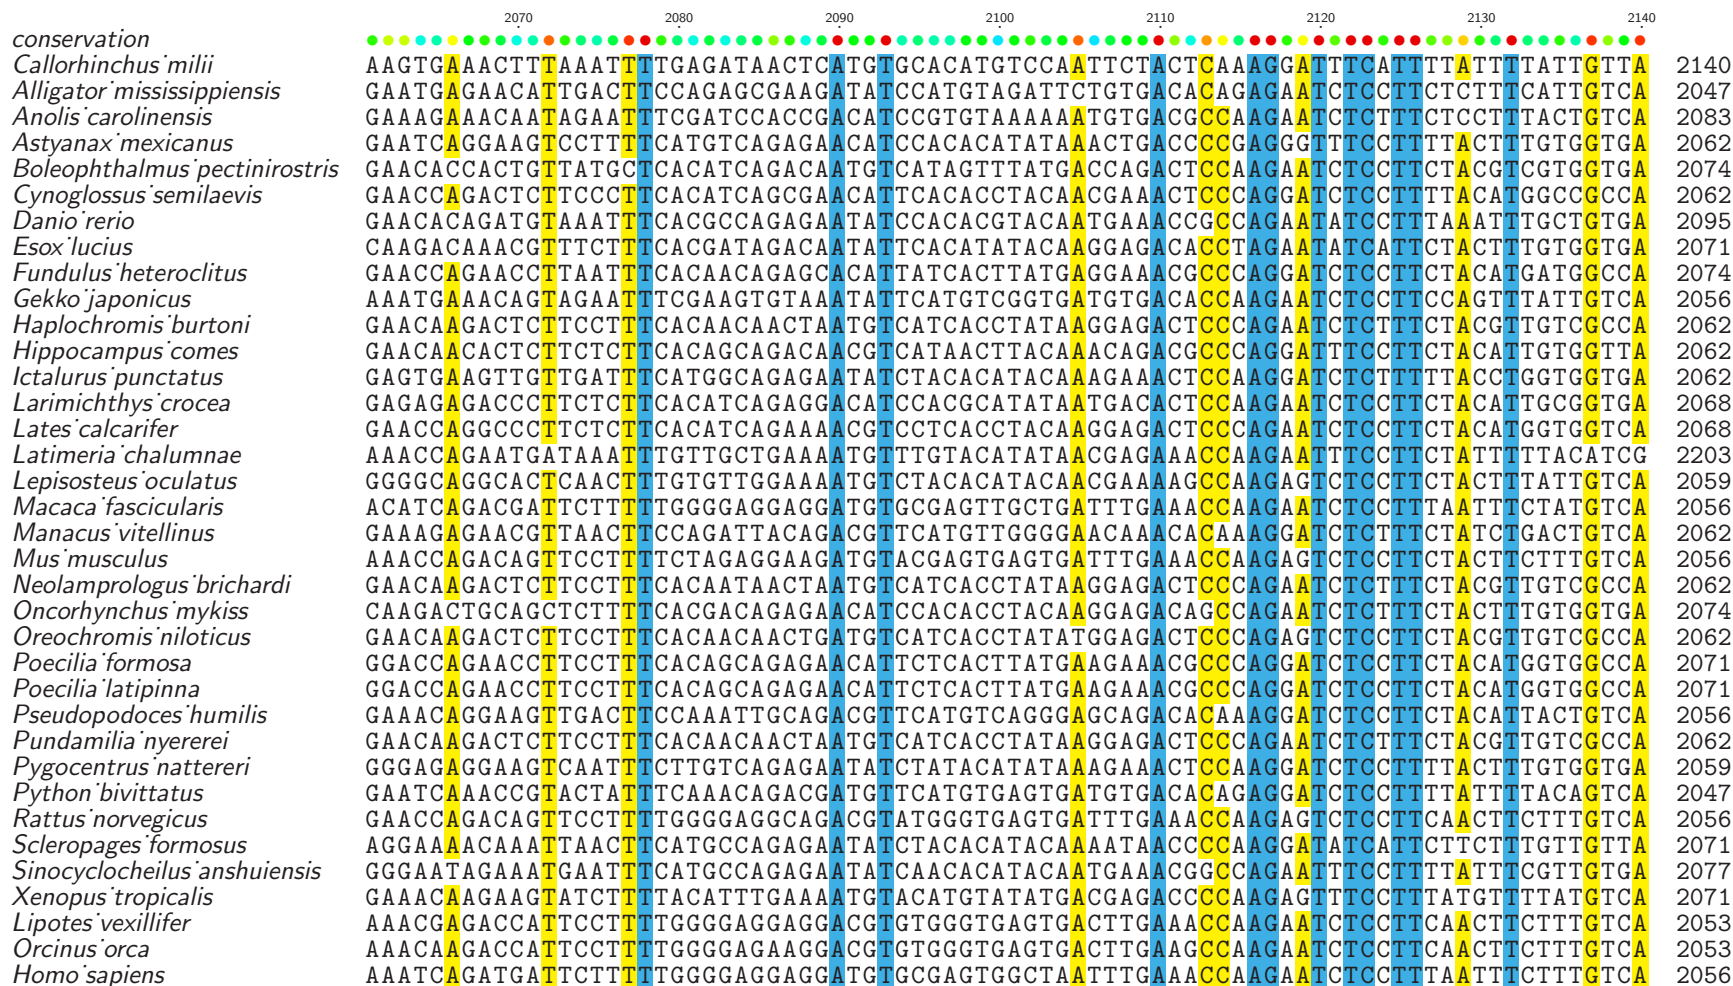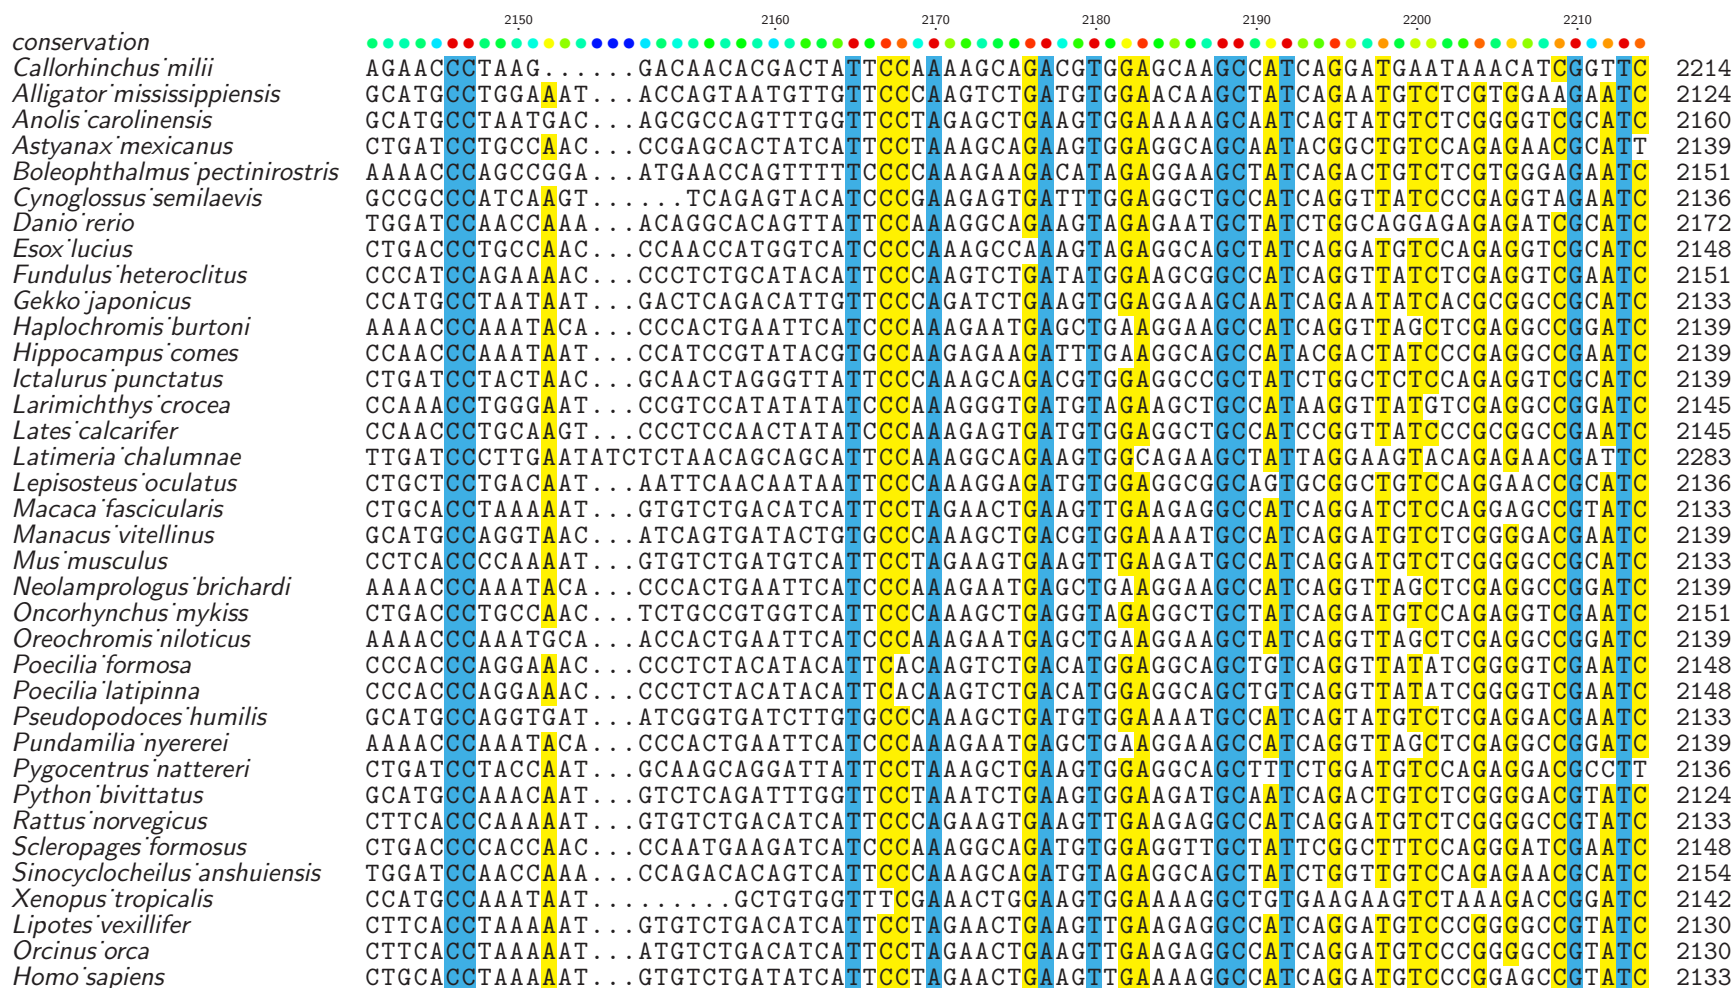

|                                      | 2220                | 2230               | 2240              | 2250           | 2260              | 2270    | 2280 | 2290 |      |
|--------------------------------------|---------------------|--------------------|-------------------|----------------|-------------------|---------|------|------|------|
| conservation                         |                     |                    |                   |                |                   |         |      |      |      |
| <i>Callorhinchus milii</i>           | AACAGTGCATTTTCTAC   | TGGATGATAAAACGCT   | TGGAATTTGTGGCAT   | TTCCCCCACTCT   | TTGGCCCTCAGAGTAA  | AATCCTC |      |      | 2294 |
| <i>Alligator mississippiensis</i>    | AGTGAGGCTTTCAAAC    | TGGATGACAAAGACGCTT | GAGTTTGAGGGCAT    | TTCTTCCAACACT  | TGACCCACCATTTGA   | AACCAAC |      |      | 2204 |
| <i>Anolis carolinensis</i>           | AATGAAGCATTTCAAAC   | TGGATGATGAAACTT    | TGGAATTTGTCTGGAA  | TCTATCCACTTT   | TGGCACCACCTTATGA  | ACCC    |      |      | 2240 |
| <i>Astyanax mexicanus</i>            | AATAGTGTTTTCCACCT   | TGAACGATGACACGCT   | TGAGTTTCGAGGGACT  | TGGTGGCCACCT   | TGGCTCCACCTCCAGAG | CAACC   |      |      | 2219 |
| <i>Boleophthalmus pectinirostris</i> | AACGATGCCTTCCAGCT   | CAGTGACAGCACT      | CTGGAGTTTGTGGGCG  | TGCCTCCGACTTT  | TATCTCCGCTGCTGA   | GCAGCC  |      |      | 2231 |
| <i>Cynoglossus semilaevis</i>        | AATGATGCCTTTCAACT   | TGGAATGACTGGACGCTT | GAGTTCTTAGGCT     | TCCCAGCAACACT  | TGGCCCCCTGTAGAG   | CAGCC   |      |      | 2216 |
| <i>Danio rerio</i>                   | AATGGTGCAATTTCTACT  | TAAAGTGACGAAACT    | CTGGAATTTGTTGGCT  | TGATGGCAACATT  | TAGCACCACAAAAG    | AGGAAAA |      |      | 2252 |
| <i>Esox lucius</i>                   | AATGATGCTTTCCAAC    | TGGACGATAAATCT     | CTGGAGTTTGAGGGTCT | TCCTAGCAACACT  | TGGCCCCGCCGTGGAG  | CAGCC   |      |      | 2228 |
| <i>Fundulus heteroclitus</i>         | AACGAAGCCTTTCCAAT   | TAGATGACCAGACGCT   | CGAGTTTGTAGGTAT   | CCAGCTACGCT    | TGGCCCCGCCATAAG   | CAGCC   |      |      | 2231 |
| <i>Gekko japonicus</i>               | AATGAAATTTTCCAAC    | TGGATGACCAAACCT    | CTAGAGTTTATTGGCA  | TTGCTCCAACACT  | TGGAACCACCTTACACA | CTCC    |      |      | 2213 |
| <i>Haplochromis burtoni</i>          | AACGACGCCTTCAACT    | TAGGTGATAAATCT     | CTGGAGTTTGCCGGTAT | TCCTACCAACACT  | TGGCTCACCCTACTGA  | CAACC   |      |      | 2219 |
| <i>Hippocampus comes</i>             | AACGACGCTTTCCAGCT   | TGGATGACCACACACT   | TAGAGTTTGACGGTAT  | CCCGGCAACGCT   | TTTCACTCTGTGGAG   | CAACC   |      |      | 2219 |
| <i>Ictalurus punctatus</i>           | AATGGGTTTTCAGCT     | TGACAGACGACACT     | GTGAGTTTGAAGGCC   | TGCGTGCCACAT   | TGGCTCCTCCACAGAG  | CCAAA   |      |      | 2219 |
| <i>Larimichthys crocea</i>           | AACAATGCCTTCCAAT    | TGGATGACAGGACGCT   | TGAGTTTGAGGGTAT   | TATACCAACACT   | TGGCACTCCACGCAG   | CAGCC   |      |      | 2225 |
| <i>Lates calcarifer</i>              | AACGATGCCTTCCAGT    | TGGATGACAGGACACT   | TGAGTTTGTGGGTAT   | CCCAGCAACACT   | TGGCCCTCCTGTGGAG  | CAGCC   |      |      | 2225 |
| <i>Latimeria chalumnae</i>           | AACAGTGCTTTTATGCT   | TGGATGATAAGACT     | CTTCAATTTGTGGGTAT | TCCTCCAACACT   | TGGACCCAGTATAAG   | CCACC   |      |      | 2363 |
| <i>Lepisosteus oculatus</i>          | AATAGTGTTTTCTACT    | TAGATGACAAAACCT    | TAGAGTTTGAGGGTCT  | TCCAGCAACATT   | TAAACCACCTCAAGAG  | CAGCC   |      |      | 2216 |
| <i>Macaca fascicularis</i>           | AATGATGCTTTCCGCT    | TGAATGACAACAGC     | CTGGAGTTTCTGGGAT  | TACAGCAACACT   | TGGACCTCCTTACCAG  | TCC     |      |      | 2213 |
| <i>Manacus vitellinus</i>            | AATGAGGCTTTTCAGGT   | TGGATGATAAACGCT    | TGAGTTTGTGGGCAT   | TACTTCCAACCT   | TGGCGACCTTATGA    | ACACC   |      |      | 2219 |
| <i>Mus musculus</i>                  | AATGATGCTTTTGGCT    | TGAATGATAACAGC     | CTGGAGTTTCTGGGAT  | TCACCCAACACT   | TTGAGCCACCTTACCAG | CTCC    |      |      | 2213 |
| <i>Neolamprologus brichardi</i>      | AACGACGCCTTCAAGT    | TAGGTGATAAATCT     | CTGGAGTTTGCCGGTAT | TCCTACCAACACT  | TGGCTCACCCTACTGA  | CAACC   |      |      | 2219 |
| <i>Oncorhynchus mykiss</i>           | AATGACGCATTCAAAC    | TGGACGATAAAACCT    | CTGGAGTTTCGAGGTC  | TCTTAGCAACGCT  | TGGCCCCGCCGTGGAG  | CAGCC   |      |      | 2231 |
| <i>Oreochromis niloticus</i>         | AATGACGCCTTCAAGT    | TAGATGATAAATCT     | CTGGAGTTTGCCGGTAT | TCCTACCAACACT  | TGGCTCACCCTACTGA  | CAACC   |      |      | 2219 |
| <i>Poecilia formosa</i>              | AACGAAGCCTTTCCAAT   | TGGACGACCACACACT   | CGAGTTTCGTAGGTAT  | TCGTACCGACGCT  | TGGCCCCGCTGTAAAG  | CAGCC   |      |      | 2228 |
| <i>Poecilia latipinna</i>            | AACGAAGCCTTTCCAAT   | TGGACGACCACACACT   | CGAGTTTCGTAGGTAT  | TCGTACCGACGCT  | TGGCCCCGCTGTAAAG  | CAGCC   |      |      | 2228 |
| <i>Pseudopodoces humilis</i>         | AATGAGGCTTTTCAGCT   | TGGATGATAAATCACT   | TGAGTTTGTGGGAAT   | TACTTCCAACCT   | TGGCTGCACCCTATGA  | ACACC   |      |      | 2213 |
| <i>Pundamilia nyererei</i>           | AACGACGCCTTCAACT    | TAGGTGATAAATCT     | CTGGAGTTTGCCGGTAT | TCCTACCAACACT  | TGGCTCACCCTACTGA  | CAACC   |      |      | 2219 |
| <i>Pygocentrus nattereri</i>         | AATGGAATTTTCCAGCT   | TGAGTGACGACACACT   | CTGAGTTTGAAGGTCT  | TGACAGGTACCT   | TGGCTCCTCTGCTGAG  | CCGCC   |      |      | 2216 |
| <i>Python bivittatus</i>             | AATGAAGCTTTCAAAC    | TGAATGATCAAACCTT   | TGGAATTTATTGACA   | TCTTACCAACATT  | TGGCACCACCTTATGA  | AATCAC  |      |      | 2204 |
| <i>Rattus norvegicus</i>             | AATGATATTTTGTGCT    | TGAATGATAACAGC     | CTGGAGTTTCTGGGAT  | TCACCCAACACT   | TTAAGCCACCTTACGAG | CTCC    |      |      | 2213 |
| <i>Scleropages formosus</i>          | AATGGTGTTTTCAGCT    | TGATGATACAACACT    | TGAGTTTGAAGGCAT   | TCTCTCTACACT   | TGTCTCCACCTGTGGA  | ACACC   |      |      | 2228 |
| <i>Sinocyclocheilus anshuiensis</i>  | AATGGTGCAATTTTCTACT | TCAATGATGAAACGCT   | TGGAATTTGTTGGCT   | TGCAGCAACATT   | TAGCTCCACCAAAG    | AGGAAAA |      |      | 2234 |
| <i>Xenopus tropicalis</i>            | AACAGCATATTTTAAGCT  | TAGATGACAATGCT     | CTAGAGTTTATAGGTAT | TTCTCTCTACTCT  | TGGCAGCCCAAGTAGA  | AGACC   |      |      | 2222 |
| <i>Lipotes vexillifer</i>            | AATGATGCTTTCCGCC    | TGGATGACAGCAGC     | CTGGAGTTTCTGGGGT  | TTCAGCCGACGCT  | TGGCACCCTTTATAAG  | CCACC   |      |      | 2210 |
| <i>Orcinus orca</i>                  | AATGATGCTTTCCGCC    | TGGATGACAGCAGC     | CTGGAGTTTCTGGGGT  | TTCAGCCGACGCT  | TGGCACCCTTTACGAG  | CCACC   |      |      | 2210 |
| <i>Homo sapiens</i>                  | AATGATGCTTTCCGCT    | TGAATGACAACAGC     | CTAGAGTTTCTGGGAT  | TACAGCCCAACACT | TTGACCTCTTAACCAG  | CCCC    |      |      | 2213 |

|                                      | 2300             | 2310         | 2320        | 2330            | 2340               | 2350          | 2360    | 2370     |      |
|--------------------------------------|------------------|--------------|-------------|-----------------|--------------------|---------------|---------|----------|------|
| conservation                         |                  |              |             |                 |                    |               |         |          |      |
| <i>Callorhinchus milii</i>           | GGTGACAGTCTGGCT  | TCATCCCTG    | TTTGGAGTGGT | TCATGGGCATGGT   | TTTGCATCGCGCTAGCT  | TTGCTGATTA    | TATACC  | GGAC     | 2374 |
| <i>Alligator mississippiensis</i>    | TGTCACCATATGGCT  | TAATAGT      | TTTGGAGTAGT | CTATAGGCGTTGT   | TAGTTAGTTGGAATCA   | TGTTCTTGATCT  | TCACT   | GGGC     | 2284 |
| <i>Anolis carolinensis</i>           | AGTCACTGTGGGT    | TATAGT       | TTTGGAAATT  | TCTGATAGGTAT    | TGTAGTATCGCATCCA   | TGGCTTGATCAT  | CATG    | GGGAG    | 2320 |
| <i>Astyanax mexicanus</i>            | CGTGACCATTTGGCT  | TGGTGGT      | TTTGGAGTGGT | TGATGGCCGTGGT   | TGTTTGTGCGGGGGT    | TTTACCTAGT    | TGT     | CATGGGTG | 2299 |
| <i>Boleophthalmus pectinirostris</i> | TGTGGAGGTGTTGGCT | TGTTCATATTT  | GGGGTGGT    | TCATGGGACTTGT   | TAGTCTCACC         | GGCATCTATAT   | GGTGT   | CTCCGGTA | 2311 |
| <i>Cynoglossus semilaevis</i>        | AGTGGAGGTGTTGGCT | TGGTTGTATTC  | GGAGTTGT    | TCATGGGAGTGGT   | TGGTCCTAATGGGCAT   | TGTTTCTCATCAT | CTCT    | GGTG     | 2296 |
| <i>Danio rerio</i>                   | AATCACAAATTTGGCT | TGGTGGT      | TTTGGGGTAGT | ATGGGGAGTGACT   | GTCCCTGCGGGGAT     | CTACCTCGT     | TACCAC  | GGGA     | 2332 |
| <i>Esox lucius</i>                   | GGTAACGTCTGGCT   | TGGTGGT      | TTTGGTGTGGT | TGATGGGATGGT    | TGTTCTGCATGGGGT    | CTCACTGGT     | TAA     | CTCCGGAC | 2308 |
| <i>Fundulus heteroclitus</i>         | CGTGAGGTGTTGGCT  | TGGTGGT      | TTTGGTGTGGT | TGATGGGCATCGT   | TGGTGGCACTGGGTCT   | CTACCTCAT     | CAT     | AACTGGTG | 2311 |
| <i>Gekko japonicus</i>               | AGTCACTGTCTGGCT  | TGATATTATTT  | GGAATTGT    | CTATGGGCATTGT   | CGTAGTTGCGATGAT    | TGTTTGATCAT   | CACT    | GGAC     | 2293 |
| <i>Haplochromis burtoni</i>          | TGTGCAGGTGTTGGCT | TGGTGGT      | TTTGGTGTGGT | TATGGGCATTGT    | TGGTGGTAGCCGGCGT   | CTACCTTGT     | CGTCTCT | GGTG     | 2299 |
| <i>Hippocampus comes</i>             | GGTGGAGGTGTTGGCT | TGGTTGTGTTT  | GGAGTGGT    | TATGGGAGTGGT    | TGGTGGTGAATGGGGCT  | CTCTCATCAT    | CTCT    | GGCA     | 2299 |
| <i>Ictalurus punctatus</i>           | GTTTGAAGTGTGGCT  | TGGTTGTTT    | TTGGCTGGT   | TTATGGGCTTGGT   | TGTTGATTTGGCGT     | TTTACCTGAT    | TGTT    | CATGGGCA | 2299 |
| <i>Larimichthys crocea</i>           | GGTGGAGGTGTTGGCT | TGGTGGT      | TTTGGGGTGGT | TCATGGGAGTTGT   | TGGTGTGTTGGCAGGCGT | TTTACCTCGT    | CATCACT | GGTG     | 2305 |
| <i>Lates calcarifer</i>              | AGTGGAGGTGTTGGCT | TGGTGGT      | TTTGGGGTGGT | TCATGGGAGTCTGT  | TGGTGTCTAATGGGCAT  | CTACCTCAT     | CGTGTCT | GGCG     | 2305 |
| <i>Latimeria chalumnae</i>           | TGTTACAGTGTGGCT  | TATAGTCTTT   | TGGAGTTGT   | CTACGGTGTAGTT   | TGTGATTGGCATTAT    | TATCCTTGT     | TGT     | CAGTGGGA | 2443 |
| <i>Lepisosteus oculatus</i>          | TGTGACTGTGTTGGCT | TTGTTGTGTTT  | GGGGTGTAT   | CTATGGGTGTGGT   | TGTGGCTGCTGCAGCAT  | CTGATTAT      | TATCT   | GGAT     | 2296 |
| <i>Macaca fascicularis</i>           | CGTTACCACATGGCT  | TAAATGTTT    | TTGGAGTTGT  | TGATGGGAGTGAT   | TAGTGGCTGGCATTGT   | CGTCTGATCTT   | CACT    | GGGA     | 2293 |
| <i>Manacus vitellinus</i>            | AGTCACCATCTGGT   | TAAATGTTATTT | GGGGTGGT    | TCATTGGTCTGGT   | TGTTCATTGGAGTTAT   | TGCCTTGATCAT  | CACT    | GGCC     | 2299 |
| <i>Mus musculus</i>                  | TGTCACCATATGGCT  | TGATTAATTT   | TGGTGTGGT   | TGATGGCACTGGT   | TAGTGGTTGGCATCAT   | CTGATTGT      | CACT    | GGGA     | 2293 |
| <i>Neolamprologus brichardi</i>      | TGTGCAGGTGTTGGCT | TGGTGGT      | TTTGGTGTGGT | TATGGGCATTGT    | TGGTGGTAGCCGGCGT   | CTACCTTGT     | CGTCTCT | GGTG     | 2299 |
| <i>Oncorhynchus mykiss</i>           | GGTCACCGTCTGGCT  | TGGTGGT      | TTTGGGGTGGT | TCATGGGACTGGT   | TGGTGTGCTGCATGGGCT | GTTACCTCAT    | CTCT    | GGTG     | 2311 |
| <i>Oreochromis niloticus</i>         | TGTGCAGGTGTTGGCT | TGGTGGT      | TTTGGTGTGGT | TATGGGCATTGT    | TGGTGGTAGCTGGCGT   | CTACCTTGT     | CGTCT   | CCGGTG   | 2299 |
| <i>Poecilia formosa</i>              | AGTGCAGGTGTTGGCT | TGGTGGT      | TTTGGTGTGGT | TCATGGGACTCAGG  | TGTTGCTGGGCGCCTAC  | CTCGTCA       | TATCT   | GGTG     | 2308 |
| <i>Poecilia latipinna</i>            | AGTGCAGGTGTTGGCT | TGGTGGT      | TTTGGTGTGGT | TCATGGGACTCAGG  | TGTTGCTGGGCGCCTAC  | CTCGTCA       | TATCT   | GGTG     | 2308 |
| <i>Pseudopodoces humilis</i>         | AGTAACCATCTGGT   | TAAATGTTATTT | GGGGTGGT    | TCATGGGTCTGAT   | TGTGTTGGAGTTAT     | TGCCTTGATCAT  | CACT    | GGGC     | 2293 |
| <i>Pundamilia nyererei</i>           | TGTGCAGGTGTTGGCT | TGGTGGT      | TTTGGTGTGGT | TATGGGCATTGT    | TGGTGGTAGCCGGCGT   | CTACCTTGT     | CGTCTCT | GGTG     | 2299 |
| <i>Pygocentrus nattereri</i>         | AGTCACCGTTGGCT   | TGGTGGT      | TTTGGAGTGGT | TCATGGCCTTGGCGG | TGTGTGTGGGAGTTT    | ACCTCGTGGT    | CAT     | GGGG     | 2296 |
| <i>Python bivittatus</i>             | CATCACTGTGGCT    | TGTAGTATTT   | TGGAGTTGT   | TGATGGTATTTGT   | TAGTGAATCGT        | CACCTTGATCAT  | TATT    | GGAC     | 2284 |
| <i>Rattus norvegicus</i>             | TGTCACCATATGGCT  | TGATTAATTT   | TGGTGTGGT   | TGATGGGAACGGT   | TAGTGGTTGGCATTT    | TATCTGATCGT   | CACT    | GGGA     | 2293 |
| <i>Scleropages formosus</i>          | TGTGACAGTGTGGCT  | TGATAGCATTT  | GGGGTGGT    | TCATGGGTCTGGT   | TGATTTTGGTTGGCAT   | TGACCTTGT     | TTTCTCT | GGCT     | 2308 |
| <i>Sinocyclocheilus anshuiensis</i>  | AATCACAGTTGGCT   | TGGTGGT      | TTTGGAGTCT  | TAATGGGTGTA     | ACTGTGTTTGGGGGGAT  | CTACCTCAT     | TACCAC  | AGGGA    | 2314 |
| <i>Xenopus tropicalis</i>            | CTTCAGTATATGGCT  | TTGTGGT      | TTTGGTGCC   | TAGCTGCCATAA    | TAGTTGTTGCTTTT     | CATTGTTCT     | GATCGT  | TCTTGGTT | 2302 |
| <i>Lipotes vexillifer</i>            | TGTACCGTATATGGCT | TGATTAATCTTT | GGGGTGGT    | TGATGGGAGTGGT   | TAGTGAATGGTATT     | TGTGCTCAT     | CTTCACT | GGCA     | 2290 |
| <i>Orcinus orca</i>                  | TGTACCGTATATGGCT | TGATTAATCTTT | GGGGTGGT    | TGATGGGAGTGGT   | TAGTGAATGGTATT     | TGTGCTCAT     | CTTCACT | GGCA     | 2290 |
| <i>Homo sapiens</i>                  | TGTTTCCATATGGCT  | TGATTTGTTT   | TGGAGTTGT   | TGATGGGAGTGA    | TAGTGGTTGGCATTGT   | CATCTGATCTT   | CACT    | GGGA     | 2293 |



[illegible]





 non conserved  
  $\geq 60\%$  conserved  
  $\geq 85\%$  conserved
