# Supplementary material for: A Genomic Survey of Angiotensin-Converting Enzymes Provides Novel Insights into Their Molecular Evolution in Vertebrates
Source: MDPI journal article supplement (doi:10.3390/molecules23112923), 2018-11-09
Supplement: s1 [file s1]

|                         |                        |                                                                   |                                                                  |                                                                                                      |                                                                                               |                                                                                 |      |
|-------------------------|------------------------|-------------------------------------------------------------------|------------------------------------------------------------------|------------------------------------------------------------------------------------------------------|-----------------------------------------------------------------------------------------------|---------------------------------------------------------------------------------|------|
| Ace'Human<br>Ace2'Human | ATGGGGGC               | GCCTCGGGCCGCCGGGGCCGGGGCTGCT                                      | CTGGCGCGCGCTGCTGTGCTGC                                           | GC                                                                                                   | GCAGCCGGCTGGCGTGGACCCCGGGGTGCAGCCCGGCAACTTTTCTGCTGAC                                          | AGGCCGGGGCGCTCTCTCGCTCTGGCTACAACT                                               | 162  |
|                         | ATGTCAAG               | CTTCC.....TGCTCTTCAGCCTGTGTGCTCTAACTGTGTCTAGTCCACAT.....          | AGGACAAGGCACACATTTTGTGCTAACTTTAAC                                |                                                                                                      |                                                                                               |                                                                                 | 99   |
|                         |                        |                                                                   |                                                                  |                                                                                                      |                                                                                               |                                                                                 |      |
| Ace'Human<br>Ace2'Human | TCAGCCCGAA             | CAGGTCCTGTCAGAGCGTGGCCGC                                          | CAGCTGGCGCGACACCAACATCACCTCGGAGAATCAAGGCG                        | CAAGGAAACAGCCCTGCTCAGCCAGGAGTT                                                                       | CTGGGGCCCTGGGGCCAGAAGGCCAAGGA                                                                 | G.....                                                                          | 309  |
|                         | CAGGAAGCCGAA           | AGCCTTTCATCAAAGTTCACCTTGCTTGGAAATTAAACACCAATATTACTAAAGAAATCT..... | GGGACAAATGGTCTGCTTTTAAGGAACAGTCCACACTTGCC                        |                                                                                                      |                                                                                               |                                                                                 | 240  |
|                         |                        |                                                                   |                                                                  |                                                                                                      |                                                                                               |                                                                                 |      |
| Ace'Human<br>Ace2'Human | ...CTGTATGAACCGA       | CTGGCAGACTCACGGCTCGCAGCGCGCAGGATCA                                | CGGACTGTGGCACCCCTGGCTCTGCAACCTGCCTGTCTAGCGCTAGACAACAGCTCTAAGCTCC | AGCTCTAAGCAAGCTTGAACA                                                                                | AACTCTAAATACATGAGCA                                                                           | CCATCTACAGTAGTGAAAGT                                                            | 468  |
|                         | CAAACTGTAT...CCACTA... | CAAGAAATCACAATCTCACAGCAAGCTTCAGCTGCAGCTCTAGCAAAATGGCTT            | AGTGTCTAGTCTCTAGAAACACAGACAAAGCTTGAACA                           | AACTCTAAATACATGAGCA                                                                                  | CCATCTACAGTAGTGAAAGT                                                                          |                                                                                 | 396  |
|                         |                        |                                                                   |                                                                  |                                                                                                      |                                                                                               |                                                                                 |      |
| Ace'Human<br>Ace2'Human | TCCTCCCA               | CAAGATGCCACCTGGTGGCCCTGGACCCACA                                   | CTCACCAACCTGGCTTC                                                | TCGCGAGCTACGCCATCTCTGTTCCCTGGGAGGCTGGCACAACTCGGGCATCCGCTGAAA                                         | CCGCTGTACGAGGAT                                                                               | TCACTGCCCT                                                                      | 630  |
|                         | TTAAACCAGAT            | ATCCACAAGAACTGCTATATCTGAACCGGTTGATGAATAATGGCAAA                   | CAGTTTAGACTAC                                                    | AATGAAGGCTCTGGCTTGGGAAG                                                                              | CTGGAGATCTAGSTCGGCAAG                                                                         | CTGTGAGGCTATATAGAGAGATGTGCTTTG                                                  | 558  |
|                         |                        |                                                                   |                                                                  |                                                                                                      |                                                                                               |                                                                                 |      |
| Ace'Human<br>Ace2'Human | AGCAATGA               | AGCCTACAGCAGGACGGCTCACA                                           | GACACGCGGCTTCTGGCTCCTCTGGTACA                                    | CTCCCCACCTCGAG.....                                                                                  | GACGATCTGGAAC                                                                                 | CCTCTACCAACAGCTAGAGCCCTCTACCTGA                                                 | 762  |
|                         | AAAATGA                | GATGGCAAGAGCAATCATATGAG                                           | GACTATGGGATTTTGGAGAGGAGACATGA                                    | AGTAAATGGGAGAGTGGCTATGACTACAGCCGCGCCAGTTGATT                                                         | GAAGATG                                                                                       | TGGAACATACCTTTGAGAGATTAACGATATATGAAC                                            | 720  |
|                         |                        |                                                                   |                                                                  |                                                                                                      |                                                                                               |                                                                                 |      |
| Ace'Human<br>Ace2'Human | CATGCCT                | TCCTCCCGCGCAC                                                     | TCATCGCCGATACGGAGACAGAT                                          | CATCAACTCTGGGGCCATCCCTGCTCAT                                                                         | CTGCTGGGACATGTGGGCCAGAGCTGGGAAA                                                               | CACTACGACATGGTGTGCTTTCCC                                                        | 924  |
|                         | CATGCCT                | ATGGAGGCAAAAGTTGATGAATGCC                                         | TAT...CCTTCTTATCAGTCAATTGGATGCTCCCTGCTCAT                        | TTGCTGGTATATGTGGG                                                                                    | GTAGATTGGACAAATCTGTACTCTTTGACATTTCCCTTGGACAGAA                                                | CCAAACAAGATGTT                                                                  | 879  |
|                         |                        |                                                                   |                                                                  |                                                                                                      |                                                                                               |                                                                                 |      |
| Ace'Human<br>Ace2'Human | ACAGTAA                | TATCTCAGCAGCGCTGGACCGCACGCACA                                     | ATGTTCCGGGTGGCAAGAGTTCCTCACCTGCC                                 | AGAGCTCCCCATCCCTGCCAGTTCCTGGGAAGGGTGATGCT                                                            | GGAAAAGCGCGCCGACGGGGGNA                                                                       | TGTGTGCCACGCTCG                                                                 | 1086 |
|                         | AGTGA                  | TGAATGTGACCAGGCTGGGTGCACACAGAA                                    | ATTTCAAAGGAGGCCAAGAGTTCCTTGTATCTGTGTCTCTAATATGAC                 | TAAGTTCCTGGGAATTTGATGCTAAC                                                                           | GAACCAAGAAATTTAGAAA                                                                           | CACTCTGCCATCCACA                                                                | 1041 |
|                         |                        |                                                                   |                                                                  |                                                                                                      |                                                                                               |                                                                                 |      |
| Ace'Human<br>Ace2'Human | GCTTGGGACT             | CTACAACGGAAA                                                      | GACTTCAGGATCAAGCA                                                | GTGCACA                                                                                              | CGGGTCAGATGGAC                                                                                | CAGCTCTCCACAGTG                                                                 | 1248 |
|                         | GCTTGGGACT             | CTG...GGGAAGGG                                                    | GACTTCAGGATCCTTATGTGCACA                                         | AAAGGTGACATGGAC                                                                                      | GACTCTCTGACAGCTCATCATGAGATGGG                                                                 | CATATCAGTATGATGGCATATGCTGCACAA                                                  | 1200 |
|                         |                        |                                                                   |                                                                  |                                                                                                      |                                                                                               |                                                                                 |      |
| Ace'Human<br>Ace2'Human | CATGAGCG               | CATTGGGGACCTGCTGGGCTCTGGTCTCGGTCTCCA                              | CTCTGA                                                           | ACATCTGCACAAA                                                                                        | ATCGGCTGTGTGACCT...G                                                                          | CACCAATACACCG                                                                   | 1407 |
|                         | CATGA                  | AGCTGTTGGGGAAATCATGTCACTTTCTCTCAGCCAG                             | CTTAAGCATTTAAATCCATTGGTCTTCTGTCA                                 | CCGATTTCAAG                                                                                          | AGACAAT                                                                                       | AAACAGAAATAACTTCTGCTCAAA                                                        | 1362 |
|                         |                        |                                                                   |                                                                  |                                                                                                      |                                                                                               |                                                                                 |      |
| Ace'Human<br>Ace2'Human | TTGGTGG                | ACAGTGGCCTGGGGGTCTTTAGTGGGCGT                                     | ACCCTCCTTC                                                       | CGCTAC                                                                                               | ACTTCGACTGGTGGT                                                                               | CTCTCGAACCAAC                                                                   | 1569 |
|                         | ATGTTAGAG              | AGTGGATGGTCTTTAAAGGGGAA                                           | TTCCGAAAGA                                                       | CCAGTGGTGA                                                                                           | AAAAAGTGGTGGAGAG                                                                              | GAAGCGAGAGATAGTTGGGCTGGTGAA                                                     | 1524 |
|                         |                        |                                                                   |                                                                  |                                                                                                      |                                                                                               |                                                                                 |      |
| Ace'Human<br>Ace2'Human | GTGACACC               | CATACATCAGTACTTTGTGAGTTTGT                                        | CCTGCA                                                           | GTCCAGTTCCAT                                                                                         | TAAGCCCTGTGCA                                                                                 | AGAGGAGGAGGCT                                                                   | 1731 |
|                         | GATTACT                | CATTCAATCAATACACA                                                 | AGGACCTTACCA                                                     | ATTCCAGTTTCA                                                                                         | AAAGCACTTGTCA                                                                                 | ACAGGTAACATGAGAGGCTGACAGAAA                                                     | 1686 |
|                         |                        |                                                                   |                                                                  |                                                                                                      |                                                                                               |                                                                                 |      |
| Ace'Human<br>Ace2'Human | TCAGG                  | CCCTGGCAGGAGTGTCTGAAGGACA                                         | GGTCCGCTTAGTGCCTGATCCCA                                          | CGCGCTGCTCAAGTACTTCCAGCC                                                                             | AGTCAACCCAGTGGCTCAGGAGCAGAAC                                                                  | CGCGGAACCGCGAGGCTTGGGCTGG                                                       | 1893 |
|                         | TCAGAA                 | CCCTGGACCTACATCTGAATGTGTAGGAGCA                                   | AGAAATGATGAATGTAA                                                | GCCACTGCTCAACTACTT                                                                                   | TAGGCTTATGAGCAGAAC                                                                            | AGAATTCT...TTGTGGGATGGAGT...                                                    | 1821 |
|                         |                        |                                                                   |                                                                  |                                                                                                      |                                                                                               |                                                                                 |      |
| Ace'Human<br>Ace2'Human | TTGCCTGACA             | ACTACCCGGAGGGCATAGACCTGGTG                                        | ACTGTGAGGGCTGAGGCCAGCA                                           | AGTTTGTGGAGGAATATGACCGGACAT                                                                          | CCCAGGTGGTG                                                                                   | TTGAACGAGTATGGCGAGGGCCAA                                                        | 2055 |
|                         | .....                  | ACGAC.....                                                        | TTGAAGTCA.....                                                   | TTGAAGTCA.....                                                                                       | TTGAAGTCA.....                                                                                | TTGAAGTCA.....                                                                  | 1854 |
|                         |                        |                                                                   |                                                                  |                                                                                                      |                                                                                               |                                                                                 |      |
| Ace'Human<br>Ace2'Human | CTGCTGCAGA             | AACATGCAAA                                                        | TAGCCAACCA                                                       | CACCCCTGAAGTACGGC                                                                                    | ACCCAGGCCAGGAAGTTGATGTGA                                                                      | ACCAGTTGCAGAAC                                                                  | 2217 |
|                         | .....                  | .....                                                             | .....                                                            | .....                                                                                                | .....                                                                                         | .....                                                                           | 1854 |
|                         |                        |                                                                   |                                                                  |                                                                                                      |                                                                                               |                                                                                 |      |
| Ace'Human<br>Ace2'Human | TACAAC                 | AGACCTTTGGATA                                                     | GGAAACA                                                          | CTACACGTGGCCACTGTGTGCC                                                                               | ACCCGAATGGCAGCTGCCTGCAGCTCGAGCCAGATCTGACGAATGTGATGGCCACGT                                     | CCCCGAAATATGAAGACCTGTTATGGGCATGGGAGGGCTGGCGAGACAAG                              | 2379 |
|                         | .....                  | AAAGTGAGATAAGCC                                                   | TAAATAGTCTTGA.....                                               | .....                                                                                                | .....                                                                                         | GATAAAGCAATGAA.....                                                             | 1914 |
|                         |                        |                                                                   |                                                                  |                                                                                                      |                                                                                               |                                                                                 |      |
| Ace'Human<br>Ace2'Human | GCGGGGAGAG             | CCATCCTCCAGTTTTACCCGAAAT                                          | ACGTGGA                                                          | ACTCATCA                                                                                             | ACCAGGCTGCCCGGCTCAATGGCTATGTAGATG                                                             | CAGGGACTCGTGAGGGTCTATGTACGAGACACCATCCCTGGAGCAAGACCTGGAGCGGCTCTTCCAGGAGCTGCAGCCA | 2541 |
|                         | .....                  | .....                                                             | .....                                                            | .....                                                                                                | .....                                                                                         | GAAATGTAC.....                                                                  | 1923 |
|                         |                        |                                                                   |                                                                  |                                                                                                      |                                                                                               |                                                                                 |      |
| Ace'Human<br>Ace2'Human | CTCTAC                 | CTCAACCTGCA                                                       | TGCCCTACTTGGCCCGCCCTGC                                           | ACCCTCACTACGGGGCCAGCACATCA                                                                           | ACCTGGAGGGGCCATTCTGCTCACCTGCTGGGGAACATGTGGGCGCAGACCTGGTCCAACATCTATGACTTGGTGGTGCCCTTCCCTTCAGCC |                                                                                 | 2703 |
|                         | CTGTT                  | CCGATCATCTGT                                                      | TGCAATCTATGA                                                     | CG.....                                                                                              |                                                                                               |                                                                                 | 1956 |
|                         |                        |                                                                   |                                                                  |                                                                                                      |                                                                                               |                                                                                 |      |
| Ace'Human<br>Ace2'Human | CCCTCGAT               | GGACACCACAGAGGCTATGCTAAAGCAGGGCT                                  | GGACGCCAGCGAGGATGTTTAAAGGAGGCTGATGATTTCTTCA                      | CCCTCCCTGGGGCTGCTGCCGTGCTCCTGAGTTCTGGAACAAGT                                                         | TCGATGCTGGAGAAGCCAACCGACGGGCGGGAGGTG                                                          |                                                                                 | 2865 |
|                         | .....                  | .....                                                             | .....                                                            | .....                                                                                                | .....                                                                                         |                                                                                 | 1956 |
|                         |                        |                                                                   |                                                                  |                                                                                                      |                                                                                               |                                                                                 |      |
| Ace'Human<br>Ace2'Human | GTCTGCCACG             | CCTCGGCCTGGGACTTCTACA                                             | ACGGCAAGGACTTCCGGATCAAGCAGTGCACC                                 | ACCCTGAACCTGGAGGGGCCATTCTGCTCACCTGCTGGGGAACATGTGGGCGCAGACCTGGTCCAACATCTATGACTTGGTGGTGCCCTTCCCTTCAGCC |                                                                                               |                                                                                 | 3027 |
|                         | .....                  | .....                                                             | .....                                                            | .....                                                                                                | .....                                                                                         | .....                                                                           | 2001 |
|                         |                        |                                                                   |                                                                  |                                                                                                      |                                                                                               |                                                                                 |      |
| Ace'Human<br>Ace2'Human | GCCAA                  | CCCCGGCTTCCATGAGGCCATTGGG                                         | GACCTGCAGCCCCTAGTGCTACGCC                                        | AGCACCTGCACAGTCTCAACCTGCTGAGCAGT                                                                     | GAGGGTGGCAGCGACGAGCATGACATCA                                                                  | AACTTTCTGATGAAGATGGCCCTTGACAAGATCGCCTTTATCG                                     | 3189 |
|                         | .....                  | .....                                                             | GAGGATGGCAGGGTAATGTGAACCA                                        | AGA.....                                                                                             |                                                                                               | ATCG                                                                            | 2037 |
|                         |                        |                                                                   |                                                                  |                                                                                                      |                                                                                               |                                                                                 |      |
| Ace'Human<br>Ace2'Human | CCCTTCAG               | CTAACCTCTGAG                                                      | CAGTGGCGCTGGAGGGTATTTGATGGA                                      | AGCATCACCAAGGAGAACTATA                                                                               | AACAGGAGTGGTGGAGCCTCAGGCTGAAGTACCAGGGCCTCTGCCCCCA                                             | CTGCCAGGACCAAGTGACTTGACCGAGGGGCCAGTTC                                           | 3351 |
|                         | TCTTTAATTTT            | TTTCTAC.....                                                      | .....                                                            | .....                                                                                                | .....                                                                                         | .....                                                                           | 2094 |
|                         |                        |                                                                   |                                                                  |                                                                                                      |                                                                                               |                                                                                 |      |
| Ace'Human<br>Ace2'Human | CACTT                  | CCTTCTAG                                                          | GTGCCTTACAT                                                      | CACTACTTTGT                                                                                          | CAGCTTCATCATCCAGTTCCAGTTCCACGAGG                                                              | CAGTGGCCACCAAGTGTGACATCTACCAGTCCAAGGAGGCCGGGCAGCGCC                             | 3513 |
|                         | GAGTT                  | GAAAAGGC                                                          | ATCAGGATGTCC                                                     | CG.....                                                                                              | .....                                                                                         | AGCCTATCAATGATGTTTC                                                             | 2145 |
|                         |                        |                                                                   |                                                                  |                                                                                                      |                                                                                               |                                                                                 |      |
| Ace'Human<br>Ace2'Human | AAGCT                  | GGCTTCAGTAGGCCGTGGCCGG                                            | AGCAAGCGCTGAC                                                    | CACGGCCAGGCC                                                                                         | ACATGAGCGCCTCGGCCATGTTGAGCTACTTCAAGCCGCTGCTGGACTGGCTCCGCACG                                   | GAGAACGAGCTGCATGGGAGAACTGGGCTGGCCGCAGTACAAC                                     | 3675 |
|                         | CGTCT                  | GAAT.....GACA                                                     | CAGCTAGAGTTCTGGGATA                                              | AGCCACAT                                                                                             | .....                                                                                         | .....                                                                           | 2193 |
|                         |                        |                                                                   |                                                                  |                                                                                                      |                                                                                               |                                                                                 |      |
| Ace'Human<br>Ace2'Human | TGGACG                 | CCGAACTCCGCTCGCTCAGAA                                             | GGCCCTCCAGACAGCGGCGCGT                                           | CAGTTCTCGGGCTGGACCTGGAT                                                                              | GTGCGAGCGCGCTGGGCGAGTGGCTGC                                                                   | CTTCTTCTGGCA                                                                    | 3837 |
|                         | .....                  | GGAGT.....                                                        | CGCTATA                                                          | CCAGCCCTTTCTATA                                                                                      | GGCTGATTTT...GAGTGTGTAGGATGATAGTGGTGGCA                                                       | TGTATCTCT                                                                       | 2280 |
|                         |                        |                                                                   |                                                                  |                                                                                                      |                                                                                               |                                                                                 |      |
| Ace'Human<br>Ace2'Human | CTCTTCA                | AGC...ATGCC                                                       | CCACGGC.....                                                     | AGCCCA                                                                                               | CGGCACTCCCAGGGCC                                                                              | CCAGTTCGGCTCGAGGTGGCGGAGACA                                                     | 3921 |
|                         | ATCTTCA                | CTGGGATGAGATCGGA                                                  | AGAAAAATAAGCAAGAA                                                | GTGGAGAAATCCTTATGCCTCCATCGATA                                                                        | TAGAAAGAGAAAT                                                                                 | AATCCAGGATTCAAAAA                                                               | 2418 |
