# Supplementary material for: A Genomic Survey of Angiotensin-Converting Enzymes Provides Novel Insights into Their Molecular Evolution in Vertebrates
Source: MDPI journal article supplement (doi:10.3390/molecules23112923), 2018-11-09
Supplement: s1 [file s1]

| conservation                         | ATG                                                                                  | conservation |
|--------------------------------------|--------------------------------------------------------------------------------------|--------------|
| <i>Callorhinchus milii</i>           | ATG                                                                                  | 3            |
| <i>Alligator mississippiensis</i>    | ATG                                                                                  | 3            |
| <i>Anolis carolinensis</i>           | ATG                                                                                  | 23           |
| <i>Astyanax mexicanus</i>            | ATG                                                                                  | 3            |
| <i>Boleophthalmus pectinirostris</i> | ATG                                                                                  | 3            |
| <i>Cynoglossus semilaevis</i>        | ATG                                                                                  | 3            |
| <i>Danio rerio</i>                   | ATG AACAGAGGG AAAAGG GAGAGCAGGACACCGATAGGAAAAGCAGGAGCATCCAGCAGTGAACGTGTCCAGACGGCTCCT | 80           |
| <i>Esox lucius</i>                   | ATG                                                                                  | 3            |
| <i>Fundulus heteroclitus</i>         | ATG                                                                                  | 3            |
| <i>Gekko japonicus</i>               | ATG                                                                                  | 3            |
| <i>Haplochromis burtoni</i>          | ATG                                                                                  | 3            |
| <i>Hippocampus comes</i>             | ATG                                                                                  | 3            |
| <i>Ictalurus punctatus</i>           | ATG                                                                                  | 3            |
| <i>Larimichthys crocea</i>           | ATG                                                                                  | 3            |
| <i>Lates calcarifer</i>              | ATG                                                                                  | 3            |
| <i>Latimeria chalumnae</i>           | ATG                                                                                  | 3            |
| <i>Lepisosteus oculatus</i>          | ATG                                                                                  | 3            |
| <i>Macaca fascicularis</i>           | ATG                                                                                  | 3            |
| <i>Manacus vitellinus</i>            | ATG                                                                                  | 3            |
| <i>Mus musculus</i>                  | ATG                                                                                  | 3            |
| <i>Neolamprologus brichardi</i>      | ATG                                                                                  | 3            |
| <i>Oncorhynchus mykiss</i>           | ATG                                                                                  | 3            |
| <i>Oreochromis niloticus</i>         | ATG                                                                                  | 3            |
| <i>Poecilia formosa</i>              | ATG                                                                                  | 3            |
| <i>Poecilia latipinna</i>            | ATG                                                                                  | 3            |
| <i>Pseudopodoces humilis</i>         | ATG                                                                                  | 3            |
| <i>Pundamilia nyererei</i>           | ATG                                                                                  | 3            |
| <i>Pygocentrus nattereri</i>         | ATG                                                                                  | 3            |
| <i>Python bivittatus</i>             | ATG                                                                                  | 3            |
| <i>Rattus norvegicus</i>             | ATG                                                                                  | 3            |
| <i>Scleropages formosus</i>          | ATG                                                                                  | 3            |
| <i>Sinocyclocheilus anshuiensis</i>  | ATG                                                                                  | 3            |
| <i>Xenopus tropicalis</i>            | ATG                                                                                  | 3            |
| <i>Lipotes vexillifer</i>            | ATG                                                                                  | 3            |
| <i>Orcinus orca</i>                  | ATG                                                                                  | 3            |
| <i>Homo sapiens</i>                  | ATG                                                                                  | 3            |

| conservation                         | 50                                     | 60         | 70             | 80                   | 90               |                   |
|--------------------------------------|----------------------------------------|------------|----------------|----------------------|------------------|-------------------|
| <i>Callorhinchus milii</i>           | TAGGG                                  | AACGCATGT  | GCCT           | TGGAGGACAAATACAAA    | CTGGC            | AACTACACCAAG 96   |
| <i>Alligator mississippiensis</i>    | TCAGC                                  | CCGGCTGCT  | GCCT           | TGGAAGCCAGTCTCTT     | GCCCCCT          | GAGGGTGACCCC 87   |
| <i>Anolis carolinensis</i>           | GCGGG                                  | GCGGCGCTC  | GCCT           | TGGACGCCTCCCTCCT     | GCCCCCGGC        | CAGCCCCGCGGCC 159 |
| <i>Astyanax mexicanus</i>            | GAGTC                                  | AGCATGGCT  | GCTCT          | GAAACCTGAGTGGAA      | GCCGGG           | ACTTATCCATCT 87   |
| <i>Boleophthalmus pectinirostris</i> | GA                                     | CTCTGTGGA  | GCTCT          | GCCTACGGAGTGGTT      | GCCGGGG          | AACTATCCAGAC 111  |
| <i>Cynoglossus semilaevis</i>        | TGGGA                                  | CTGTGTGCT  | GCTCT          | GCCAGAAGACTGGGTCC    | CAGGA            | AATTATACAGAC 114  |
| <i>Danio rerio</i>                   | GCTGG                                  | AGC        | GCGGCTCT       | GAAACCCGAGTGGAT      | GCCAGGG          | GATTATCCCTCCA 210 |
| <i>Esox lucius</i>                   | TACTC                                  | TGTGAGATT  | GTCT           | GCCACCTGAGTGGAT      | GCCGGGG          | AACTATTCTTCC 102  |
| <i>Fundulus heteroclitus</i>         | CG                                     | CTCTTTGAA  | GCTCT          | GTCAGCCAGCTGGCT      | GCCAGGG          | GACTATGCAAAC 120  |
| <i>Gekko japonicus</i>               | TGCTC                                  | CTGCTGCCG  | GCCC           | GCGGCCGCGGCCTGGGA    | GCGCCCCCG        | ACCCCCGCGC 99     |
| <i>Haplochromis burtoni</i>          | GG                                     | CAATCTGAG  | GCTCT          | GCCAGAAAGCTGGCT      | GCTGGG           | GAATTATTCAGAC 108 |
| <i>Hippocampus comes</i>             | AG                                     | CAGTGTGAC  | GCTCT          | GCCGGCCAGCTGGCT      | GCCAGGA          | GAGTATTCACAC 96   |
| <i>Ictalurus punctatus</i>           | GAGTC                                  | GGG        | GTGGCTCT       | GAAACCTGAGTGGCA      | GCTGGG           | AAGTACGATTCC 96   |
| <i>Larimichthys crocea</i>           | GA                                     | CACTCTGAG  | GCTTT          | GACAGCAAGCTGGAT      | GCCAGGG          | AATTATGATAAC 108  |
| <i>Lates calcarifer</i>              | GA                                     | CTGTGTGTG  | GCTCT          | GCCAGCAACCTGGCT      | GCCAGGG          | GAATATACAAAT 108  |
| <i>Latimeria chalumnae</i>           | CT                                     | CTAG       | GCCCT          | TGACAATAGTTACCT      | GCTCAG           | AACTACACCAAA 87   |
| <i>Lepisosteus oculatus</i>          | GG                                     | CTCGCTCATT | CTGT           | TATTCTTATTTGAACTAC   | CGGGG            | GATTACCTAGCC 84   |
| <i>Macaca fascicularis</i>           | CCGCCGCAGCCC                           | GCGCTG     | GCCCT          | TGGACCCCGGGCTGCA     | GCCGGC           | AACTTTTCCGCC 126  |
| <i>Manacus vitellinus</i>            | TCAGC                                  | CTGGCAGGT  | GCCCT          | TCGGGCCAGTTTCA       | GCCCCC           | CAGCATCCCCGC 84   |
| <i>Mus musculus</i>                  | TGCTGTTGCTGCAGCCG                      | TCGCCC     | GCCCCG         | GCACTCGACCCTGGATTGCA | GCCGGGC          | AACTTTTCCCCG 138  |
| <i>Neolamprologus brichardi</i>      | GG                                     | CAATCTGAG  | GCTCT          | GCCAGAAAGCTGGCT      | GCTGGG           | GAATTATTCAGAC 108 |
| <i>Oncorhynchus mykiss</i>           | GACTC                                  | TGTCATTTT  | GTCT           | GCCGCCGAGTGGGG       | GCCAGGG          | ACCTTCCCTGCC 102  |
| <i>Oreochromis niloticus</i>         | GG                                     | CTATCTGAG  | GCTCT          | GCCAGAAAGCTGGCT      | GCTGGG           | GAATTATTCAGAC 108 |
| <i>Poecilia formosa</i>              | TG                                     | CTATGTGAA  | GCTCT          | GCCAGCCGACTGGCT      | GCCAGGG          | GACTATGCAAAC 117  |
| <i>Poecilia latipinna</i>            | TG                                     | CTGTGTGAA  | GCTCT          | GCCAGCCGACTGGCT      | GCCAGGG          | GACTATGCAAAC 117  |
| <i>Pseudopodoces humilis</i>         | TGAGC                                  | CTGGCAGGT  | GCCCT          | TCAGCCCGGCCTCGA      | GCCCCC           | CAGCATGAGCCC 84   |
| <i>Pundamilia nyererei</i>           | GG                                     | CAATCTGAG  | GCTCT          | GCCAGAAAGCTGGCT      | GCTGGG           | GAATTATTCAGAC 108 |
| <i>Pygocentrus nattereri</i>         | GAGCC                                  | AGG        | GCTCT          | GAATCCCGAGTGGCA      | GCCGGG           | GCTTACGAGTCT 81   |
| <i>Python bivittatus</i>             | TTGGG                                  | GTGGCATT   | GCTCT          | TGGATGCCTCCCTGAT     | GCTCCT           | AACTACAACAAC 90   |
| <i>Rattus norvegicus</i>             | TGCTGCTGCTGCTGCCGCCGTGCCCC             | GCCCCG     | GCGCT          | TGACCCTGGATTGCA      | GCCGGG           | AACTTTTCCGCG 141  |
| <i>Scleropages formosus</i>          | GT                                     | GCACATTGC  | CT             | GCCAGTAGACTGGCAAC    | CAGGG            | ATGTACCCAGC 84    |
| <i>Sinocyclocheilus anshuiensis</i>  | GCACG                                  | AGC        | GCAGCTCT       | GAAACCCGAGTGGATC     | CGGGG            | GATTATTCTATG 84   |
| <i>Xenopus tropicalis</i>            | TGGGC                                  | ACCAATTCA  | GCCCT          | TGACAGCTCCTTCTCT     | GCCAGGC          | ACCTACCCCAAG 87   |
| <i>Lipotes vexillifer</i>            | TGCTGCTGCTGCCGCCGCCACCGCCGCTGTGGTCTCTG | GCTCT      | CAACCCCGCTTGCA | GCCGGG               | AACTTTTCCGCC 147 |                   |
| <i>Orcinus orca</i>                  | CCACCACCGCCGCTGTGGTCTCTG               | GCGCT      | TGACCCCGCTTGCA | GCCGGG               | AACTTTTCCGCC 132 |                   |
| <i>Homo sapiens</i>                  | CCGCCGCAGCCC                           | GCCCTG     | GCGT           | TGACCCCGGGCTGCA      | GCCGGC           | AACTTTTCTGCT 123  |

| conservation                         | 100        | 110    | 120      | 130            | 140            | 150        | 160     | 170     |                  |     |
|--------------------------------------|------------|--------|----------|----------------|----------------|------------|---------|---------|------------------|-----|
| <i>Callorhinchus milii</i>           | GATGAAGCG  | GGTG   | CTTTGTTA | TTTGTGGCTGAT   | TACAACACAACAG  | CAGAGAGCA  | TTTATTT | CAAGAGT | GTTTTCAGCCAG     | 176 |
| <i>Alligator mississippiensis</i>    | ACTGAGCAAG | GGGCT  | GTGCTTGT | TTTGCAGATAAG   | TACAACAGCAGCAG | CTGAGATAG  | TCTTGT  | CAAGAGT | GCTGAATGCCAG     | 167 |
| <i>Anolis carolinensis</i>           | ACCGAGGAG  | GGCG   | CCCGGCTC | TTGCGCCAGGAA   | TACAACGCCACCG  | CCGAGACCG  | TCTTCT  | TCTGACA | AACACGATGCCAG    | 239 |
| <i>Astyanax mexicanus</i>            | ACAGAGGCG  | GGAG   | CTGAGCTG | TTGCTCAGCGACT  | TACAACACCACCG  | CAGAACAAG  | TCTTCT  | CTTTCAG | CACGGAGGCCAG     | 167 |
| <i>Boleophthalmus pectinirostris</i> | ACAGTGGCC  | GGAG   | TGCTGTCT | TTTCTCAGTGACT  | TACAACAGCACCG  | CCGAGGAAG  | TGCTTT  | ACTACAG | TGTGACGGCATC     | 191 |
| <i>Cynoglossus semilaevis</i>        | AATAAGCTT  | GATGC  | ACTACGGT | TTCTTGATGACT   | TACAACCACACT   | GCTGAAATGG | TACTGT  | TCCAGAG | TGTCTCTGGCCAG    | 194 |
| <i>Danio rerio</i>                   | ACTGAACAAG | GGGC   | CAGAGAGG | TTTGTGAGCGACT  | TACAATCCACCG   | CCGAGGAGG  | TGCTTT  | ACTTAC  | CTTACAGAGGCCAG   | 290 |
| <i>Esox lucius</i>                   | ACAGAAGAAG | GGTGC  | CATAAAG  | TTTGTGACGCTT   | TACAATACCTCCG  | TGAGCAAG   | TACCTA  | CTAA    | AACCAAGAGGCCAAG  | 182 |
| <i>Fundulus heteroclitus</i>         | ACCGTGTCT  | GGTG   | CACAGACG | TTCTCAGTGACT   | TACAACAGCACT   | GCAGAGGAGG | TGGTCT  | TTTAAC  | AGCGTGTCCGCTAG   | 200 |
| <i>Gekko japonicus</i>               | ACCGAGGCC  | GGCG   | CCCGCCTC | TTGCGCAGCGCC   | TACAACGGCAGCG  | CCGAGGCC   | GTCTT   | CTGCGC  | CAACCGTCTCCGCCAG | 179 |
| <i>Haplochromis burtoni</i>          | ACCATCAGT  | GATGC  | CACAAAGG | TTCTCAGTGACT   | TACAACAGCACCG  | CCGAGGAGG  | TGTTTT  | TTCCAC  | AGTGTCTCTGCCAG   | 188 |
| <i>Hippocampus comes</i>             | ACGGCGGCC  | GATGC  | CAGTGC   | TTTCTCGCGATT   | TACAACAGCACAG  | CGGAGGAGG  | TTTTCT  | TTTAC   | AGCGTGTCCGCCAG   | 176 |
| <i>Ictalurus punctatus</i>           | ACAGAGGCT  | GGGGC  | CATTACG  | TTTGTGAGTGATT  | TACAACCTCGACT  | GCTGAGCAAG | TGTTCT  | ACTATA  | GACACAGAGGCCAAG  | 176 |
| <i>Larimichthys crocea</i>           | ACCACGGC   | CAGAGG | CATTAAGG | TTTCTAAATGACT  | TACAACAGCACT   | GCCGAGGAGG | TGTTAT  | TTCTT   | CAGCGTCTCTGCCAG  | 188 |
| <i>Lates calcarifer</i>              | ACCACGGAT  | GATGC  | ACTAAGG  | TTCTCAGTGACT   | TACAACAGCACT   | GCTGAGGAGG | TGTTAT  | TTTAC   | AGCGTTTCTGCCAG   | 188 |
| <i>Latimeria chalumnae</i>           | AATAAAAT   | TGGGGC | CTTGCAA  | TTTGTGAGTGACT  | TACAACAGCACT   | GGGAGGAGG  | TCTTCT  | TTTAAA  | AGTGTATCTGCCAAG  | 167 |
| <i>Lepisosteus oculatus</i>          | AATGAGACG  | GGGGC  | GTTAGAT  | TTTGTGAATGACT  | TACAACACCTCAG  | CTGAGCAGG  | TTTTCT  | TTCCG   | CAGCACCAGTGCCAG  | 164 |
| <i>Macaca fascicularis</i>           | GACGAGGCC  | GGGGC  | GCAACTC  | TTGCGCAGAGCT   | TACAATTGAGCG   | CCGAACAGG  | TGCTGTT | CTCAG   | AGCGTGCCGCCAG    | 206 |
| <i>Manacus vitellinus</i>            | ACCGAGGAG  | GGGGC  | CGCCCTC  | TTGCGCAGTGACT  | TACAACAGCACCG  | CCGAGCTCG  | TCTCTT  | CTTGAG  | AGCGTCTCGGCCAG   | 164 |
| <i>Mus musculus</i>                  | GACGAGGC   | AGGGC  | GCAGCTT  | TTTGTGAAAGCT   | TATAACTCGAGT   | GCCGAGGTGG | TGATGTT | TTCCAG  | AGCACCGTGGCCAG   | 218 |
| <i>Neolamprologus brichardi</i>      | ACCATCAGT  | GATGC  | CACAAAGG | TTCTCAGTGACT   | TACAACAGCACCG  | CCGAGGAGG  | TGTTTT  | TTCCAC  | AGTGTCTCTGCCAG   | 188 |
| <i>Oncorhynchus mykiss</i>           | ACAGAGGCC  | GGGGC  | CAAAGACT | TTTGTCACTGCC   | TACAATACCGCCG  | CTGAGCTGG  | TATCTA  | CCAAA   | ACCAAGAGGCCAG    | 182 |
| <i>Oreochromis niloticus</i>         | ACCATCAGT  | GATGC  | CACAAAGG | TTCTCAGTGACT   | TACAACAGCACCG  | CCGAGGAGG  | TGTTTT  | TTCCAC  | AGTGTCTCTGCCAG   | 188 |
| <i>Poecilia formosa</i>              | TCTGTGAC   | GATGG  | CCAGAGG  | TTTCTCAGTGACT  | TACAACAGCACCG  | CAGGAGG    | TGTTCT  | TTTAC   | AGCGTGTCCGCCAG   | 197 |
| <i>Poecilia latipinna</i>            | TCTGTGAC   | GATGG  | CCAGAGG  | TTTCTCAGTAAC   | TACAACAGCACCG  | CAGAGGAGG  | TGTTCT  | TTTAC   | AGCGTGTCCGCCAG   | 197 |
| <i>Pseudopodoces humilis</i>         | ACCGAGGA   | AGGGC  | CACCCGC  | TTGCGCAGAGACT  | TACAACAGCACCG  | CCGAGCTCG  | TCTCTT  | CTTGAG  | AGCGTCTCGGCCAG   | 164 |
| <i>Pundamilia nyererei</i>           | ACCATCAGT  | GATGC  | CACAAAGG | TTCTCAGTGACT   | TACAACAGCACCG  | CCGAGGAGG  | TGTTTT  | TTCCAC  | AGTGTCTCTGCCAG   | 188 |
| <i>Pygocentrus nattereri</i>         | TCGGAGGC   | AGGGC  | CAATCGG  | TTTGTGAGTGACT  | TACAACAGCACT   | GAGAGCAAG  | TCTTCT  | TACTT   | CAGCACAGAGGCCAG  | 161 |
| <i>Python bivittatus</i>             | ACCGAGGA   | AGGGC  | CCGCTGT  | TTGCCCCAAAGACT | TATAACAGCACCG  | GGGAAACT   | TGTTCT  | TTGAA   | AGCGTCTCCGCCAG   | 170 |
| <i>Rattus norvegicus</i>             | GACGAGGC   | AGGGC  | GCAGCTC  | TTTGTGACAGCT   | TATAACTCGAGT   | GCCGAGGTGG | TGATGTT | CTCAG   | AGCACCGCAGCCAG   | 221 |
| <i>Scleropages formosus</i>          | ACAGAGGA   | AGGAG  | GAAACAAT | TTTGTGATGAAT   | TATAATTCAACGG  | CAGAGGAGG  | TTTTCT  | TTTAC   | AGCACCAGCGCCAG   | 164 |
| <i>Sinocyclocheilus anshuiensis</i>  | ACAGAGGC   | AGGGC  | CTGAGAGC | TTTGTGAGCGACT  | TACAACCTCAACCG | CCGAGGAGG  | TCTTCT  | TACTT   | CAGCACAGAGGCCAG  | 164 |
| <i>Xenopus tropicalis</i>            | GATGAGGCT  | GTTGC  | CAGAGACT | TTTGTCCGATGCC  | TACAACAGCACAG  | CAGAGGTTAT | CTTATT  | TTCAAG  | AGTGTGGAAGCCAG   | 167 |
| <i>Lipotes vexillifer</i>            | GACGAGGCC  | GGGGC  | CAGAGGTT | TTGCGAGAGAGCT  | TCAATTCCAGCG   | CCGAGCAGG  | TGCTGTT | CTCAC   | AGCAGCGCCGCCAG   | 227 |
| <i>Orcinus orca</i>                  | GACGAGGCC  | GGTGC  | CGAGGTC  | TTGCGAAAGAGCT  | TCAATTCCAGCG   | CCGAGCAGG  | TGTTCT  | TTTAC   | AGCAGCGCCGCCAG   | 212 |
| <i>Homo sapiens</i>                  | GACGAGGCC  | GGGGC  | GCAGCTC  | TTGCGCAGAGCT   | TACAATCCAGCG   | CCGAACAGG  | TGCTGTT | TTCCAG  | AGCGTGGCCGCCAG   | 203 |

|                                      | 180                                                                                   | 190                                   | 200 | 210 | 220 | 230 | 240 | 250 |  |
|--------------------------------------|---------------------------------------------------------------------------------------|---------------------------------------|-----|-----|-----|-----|-----|-----|--|
| conservation                         |                                                                                       |                                       |     |     |     |     |     |     |  |
| <i>Callorhinchus milii</i>           | CTGGAATTACAAACACCAATCTGACCAAATATAACAGCAGAAAA                                          | CAGATCAATGCCTCGCTAGTTGAGCAAGAGTTTACGG | 256 |     |     |     |     |     |  |
| <i>Alligator mississippiensis</i>    | CTGGAATTACAAACACCAACCTGACCGACTTCAACTCCAACCTGCAGATCATGGCCTCGCTGGAGGAGCAGAATTTACAGG     | 247                                   |     |     |     |     |     |     |  |
| <i>Anolis carolinensis</i>           | CTGGGTTTACAAACACCAACCTCACCGACTTCAACGCCAGCTGCAGGTGGCAGCTTCTTTGATGGAGCAAGAAATTCATAG     | 319                                   |     |     |     |     |     |     |  |
| <i>Astyanax mexicanus</i>            | CTGGGAATACAAACACCAACCTGACCAATGAAAACTCCCTGCAACAGATCCAGGCGTCTATGATAGAGCAAGAAATTTACAG    | 247                                   |     |     |     |     |     |     |  |
| <i>Boleophthalmus pectinirostris</i> | ATGGAACCTACAAACACCAACCTGACGGCGCACAACTCACAGCTGCAGGTCCAGGCTCCATGGATGAGCAGGCCCTTTAGTG    | 271                                   |     |     |     |     |     |     |  |
| <i>Cynoglossus semilaevis</i>        | CTGGAACCTACAAACACCAACATCACACAACCAAATCTCAGCTTCAGGTAATTCATCTCTTGAAGAACAGGAATTTCTCTG     | 274                                   |     |     |     |     |     |     |  |
| <i>Danio rerio</i>                   | CTGGAACCTACAAACACCAACCTGACCGATCACAAATTCACAACCTGCAGATAGAAGCATCTTTGGAGGAGCAGGCTTTTACAG  | 370                                   |     |     |     |     |     |     |  |
| <i>Esox lucius</i>                   | CTGGACTTACAGACCAACATTACAACCTCAAACTCGGATAAAAAAGTGGAAATCTGACGGGCTGAAGCAAGCTTTTCACAG     | 262                                   |     |     |     |     |     |     |  |
| <i>Fundulus heteroclitus</i>         | CTGGAACCTACAAACACCAACCTTACGGATCACAACTCCAAGCTGCAGGTAGCTGCAAGTCTCGAAGAACCAAGCCTTTGATG   | 280                                   |     |     |     |     |     |     |  |
| <i>Gekko japonicus</i>               | CTGGGCCTACAAACACCAACCTCACCGCCGCCAACGCCAGCAGCAGGTGAATTCCTCTTTGGACGAACAGGAGTTTATAC      | 259                                   |     |     |     |     |     |     |  |
| <i>Haplochromis burtoni</i>          | CTGGAACCTACAAACACCAACATAACAGACCACAACTCAAAGCTTCAGGTAAGTGCATCTCTTGAAGAACAGGCATTTCGTGG   | 268                                   |     |     |     |     |     |     |  |
| <i>Hippocampus comes</i>             | CTGGAACCTACAAACACCAACCTTGACAGAGTACAACCTCTCAACTGCAGGTAAACGCATCCTTGGAGGAGCAAGCTTTTCATCG | 256                                   |     |     |     |     |     |     |  |
| <i>Ictalurus punctatus</i>           | CTGGGAGCATAAAACCAACCTGACGGAGTACAATTCCAGCAAGAGGTGCTGGCAAGTCTAGAGAAACAAAATTTACACAG      | 256                                   |     |     |     |     |     |     |  |
| <i>Larimichthys crocea</i>           | CTGGAACCTACAAACACCAACATAACAAGCCACAACTCTGAGCTTCAGGTAATGCATCTCTTGACGAGCAGGCCTTTGCAT     | 268                                   |     |     |     |     |     |     |  |
| <i>Lates calcarifer</i>              | CTGGAACCTACAAACACCAACATAACAGAGCACAACTCCATGCTTCAGGTAATGCAGCCCTTGAAGAGCAAGCATTCTCAG     | 268                                   |     |     |     |     |     |     |  |
| <i>Latimeria chalumnae</i>           | TTGGGATTATAACACAAATCTGACTACATACAACCAGGAAAAACAGATCAATGCATCTTTAGAGGAGCAAGAGTTCTCTG      | 247                                   |     |     |     |     |     |     |  |
| <i>Lepisosteus oculatus</i>          | CTGGACATACAAACACCGACTGAATGAACATAACAGATAGCACAGGTTAAACGCCTCAATGGAGGAGCAGGCCCTTTGTGG     | 244                                   |     |     |     |     |     |     |  |
| <i>Macaca fascicularis</i>           | CTGGGCTCATGACACCAACATCACGCCGAGAAATGCACGGGCCAGGAGGAAGCAGCCCTGCTCAGCCAGGAGTTTGCCG       | 286                                   |     |     |     |     |     |     |  |
| <i>Manacus vitellinus</i>            | CTGGAATTACAAACACCAACCTGACGGCGGAAAAACGCTGCTCTGCAGGTCAGGCTCGCTGGAGGAGCAAGCAACTTCACGG    | 244                                   |     |     |     |     |     |     |  |
| <i>Mus musculus</i>                  | TTGGGCGCAGGACACCAACATCACGGAGGAGAACGGCGGACGCCAGGAGGAAGCGGCCCTGGTCAGCCAGGAGTTTGCGAG     | 298                                   |     |     |     |     |     |     |  |
| <i>Neolamprologus brichardi</i>      | CTGGAACCTACAAACACCAACATAACAGACCACAACTCAAAGCTTCAGGTAAGTGCATTTCTTGAAGAACAGGCATTGTGG     | 268                                   |     |     |     |     |     |     |  |
| <i>Oncorhynchus mykiss</i>           | CTGGACATACCAGACCAACATTACGCCCCACAAACGCAGAGAAAAAGGTGGAATCTGATGGGATGAAGCAGGCCCTTCACAG    | 262                                   |     |     |     |     |     |     |  |
| <i>Oreochromis niloticus</i>         | CTGGAACCTACAAACACCAACATAACAGACCACAACTCAAAGCTTCAGGTAAGTGCATCTCTTGAAGAACAGGCATTCTGTGG   | 268                                   |     |     |     |     |     |     |  |
| <i>Poecilia formosa</i>              | CTGGAACCTACAAACACCAACCTGACGGAGCACAACTCAAAGCTGCAGGTACTTGCAAGTCTTGAAGAACCAAGCATTGTGTG   | 277                                   |     |     |     |     |     |     |  |
| <i>Poecilia latipinna</i>            | CTGGAACCTACAAACACCAACCTGACGGAGCACAACTCAAAGCTGCAGGTACTTGCAAGTCTTGAAGAACCAAGCCTTGTGTG   | 277                                   |     |     |     |     |     |     |  |
| <i>Pseudopodoces humilis</i>         | CTGGAATTACACCACCAACCTGACGGCGGAAAAATGCTGCTCTGCAGGTCAAGGCATCACTGGAGGAGCAGAACTTCACAG     | 244                                   |     |     |     |     |     |     |  |
| <i>Pundamilia nyererei</i>           | CTGGAACCTACAAACACCAACATAACAGACCACAACTCAAAGCTTCAGGTAAGTGCATCTCTTGAAGAACAGGCATTTCGTGG   | 268                                   |     |     |     |     |     |     |  |
| <i>Pygocentrus nattereri</i>         | CTGGACATACAAACACCAACCTGACGGACTACAACCTCCAGCAACAGGTTCTGTGCATCTTTGGAGGAGCAAGCATTTAGTG    | 241                                   |     |     |     |     |     |     |  |
| <i>Python bivittatus</i>             | CTGGAATTACAAACACCAACCTGACAGACGAGAACGCTCAGCTGCAGGTAGCAGCTTCTTTGAAGGAACAAAATTTACAG      | 250                                   |     |     |     |     |     |     |  |
| <i>Rattus norvegicus</i>             | CTGGGCGCACGACACCAACATCACGGAGGAGAAATGCGCGGCTCCAGGAGGAAGCGGCCCTGATCAACCGAGGAGTTTGCGAG   | 301                                   |     |     |     |     |     |     |  |
| <i>Scleropages formosus</i>          | CTGGGCATACAAACACCAACCTGACTGAAGAGAACTCCAAAATACAGGTTGAAGCCTCCTTAGAGGAACAGGCCTTTCACAG    | 244                                   |     |     |     |     |     |     |  |
| <i>Sinocyclocheilus anshuiensis</i>  | CTGGAACCTACAAACACCAACCTGACAGATCACAAATTCACAGCTGCAGATTGCTGCATCTTTGGAGGAGCAGGCCTTTCACAG  | 244                                   |     |     |     |     |     |     |  |
| <i>Xenopus tropicalis</i>            | TTGGGCATATAACACCAACCTGACTGACTACAACCTCAAAGCAGCAGATTCTAGCTTCCATGGAGGAGCAGGAGTTTAATG     | 247                                   |     |     |     |     |     |     |  |
| <i>Lipotes vexillifer</i>            | CTGGGCGCACGACACCGACATCAACGAGGAAAAACGCGCGGCGCCAGGAGGAGGCAGCCCTGCTCAGCCAGGAGTTTTCAG     | 307                                   |     |     |     |     |     |     |  |
| <i>Orcinus orca</i>                  | CTGGGCGCACGACACCAACATCACCGAGGAAAAACGCGCGGCGCCAGGAGGAGGCAGCCCTTAATCAGCCAGGAGTTTTCAG    | 292                                   |     |     |     |     |     |     |  |
| <i>Homo sapiens</i>                  | CTGGGCGCACGACACCAACATCACCGCGGAGAAATGCAAGGCGCCAGGAGGAAGCAGCCCTGCTCAGCCAGGAGTTTGCGG     | 283                                   |     |     |     |     |     |     |  |

|              | 260                                                                                                                                                                                                                                                                                                                                                                                                                                                                                                                                                                                                                                                                                                                                                                                                                                                                                                                                                                                                                                                                                                                                                                                                                                                                                                                                                                                                                                                                                                                                                                                                                                                                                                                                                                                                                                                                                                                                                                                                                                                                                                                                                                                                                                                                                                                                                                                                                                                                                                                                                                                                                                                                                                                                                                                                                                                                                                                                                                                                                                                                                                                                                                                                                                                                                                                                                                                                                                                                                                                                                                                                                                                                                                                                                                                                                                                                                                                                                                                                                                                                                                                                                                                                                                                                                                                                                                                                                                                                                                                                                                                                                                                                                                                                                                                                                                                                                                                                                                                                                                                                                                                                                                                                                                                                                                                                                                                                                                                                                                                                                                                                                                                                                                                                                                                                                                                                                                                                                                                                                                                                                                                                                                                                                                                                                                                                                                                                                                                                                                                                                                                                                                                                                                                                                                                                                                                                                                                                                                                                                                                                                                                                                                                                                                                                                                                                                                                                                                                                                                                                                                                                                                                                                                                                                                                                                                                                                                                                                                                                                                                                                                                                                                                                                                                                                                                                                                                                                                                                                                                                                                                                                                                                                                                                                                                                                                                                                                                                                                                                                                                                                                                                                                                                                                                                                                                                                                                                                                                                                                                                                                                                                                                                                                                                                                                                                                                                                                                                                                                                                                                                                                                                                                                                                                                                                                                                                                                                                                                                                                                                                                                                                                                                                                                                                                                                                                                                                                                                                                                                                                                                                                                                                                                                                                                                                                                                                                                                                                                                                                                                                                                                                                                                                                                                                                                                                                                                                                                                                                                                                                                                                                                                                                                                                                                                                                                                                                                                                                                                                                                                                                                                                                                                                                                                                                                                     | 270 | 280 | 290 | 300 | 310 | 320 | 330 |  |
|--------------|---------------------------------------------------------------------------------------------------------------------------------------------------------------------------------------------------------------------------------------------------------------------------------------------------------------------------------------------------------------------------------------------------------------------------------------------------------------------------------------------------------------------------------------------------------------------------------------------------------------------------------------------------------------------------------------------------------------------------------------------------------------------------------------------------------------------------------------------------------------------------------------------------------------------------------------------------------------------------------------------------------------------------------------------------------------------------------------------------------------------------------------------------------------------------------------------------------------------------------------------------------------------------------------------------------------------------------------------------------------------------------------------------------------------------------------------------------------------------------------------------------------------------------------------------------------------------------------------------------------------------------------------------------------------------------------------------------------------------------------------------------------------------------------------------------------------------------------------------------------------------------------------------------------------------------------------------------------------------------------------------------------------------------------------------------------------------------------------------------------------------------------------------------------------------------------------------------------------------------------------------------------------------------------------------------------------------------------------------------------------------------------------------------------------------------------------------------------------------------------------------------------------------------------------------------------------------------------------------------------------------------------------------------------------------------------------------------------------------------------------------------------------------------------------------------------------------------------------------------------------------------------------------------------------------------------------------------------------------------------------------------------------------------------------------------------------------------------------------------------------------------------------------------------------------------------------------------------------------------------------------------------------------------------------------------------------------------------------------------------------------------------------------------------------------------------------------------------------------------------------------------------------------------------------------------------------------------------------------------------------------------------------------------------------------------------------------------------------------------------------------------------------------------------------------------------------------------------------------------------------------------------------------------------------------------------------------------------------------------------------------------------------------------------------------------------------------------------------------------------------------------------------------------------------------------------------------------------------------------------------------------------------------------------------------------------------------------------------------------------------------------------------------------------------------------------------------------------------------------------------------------------------------------------------------------------------------------------------------------------------------------------------------------------------------------------------------------------------------------------------------------------------------------------------------------------------------------------------------------------------------------------------------------------------------------------------------------------------------------------------------------------------------------------------------------------------------------------------------------------------------------------------------------------------------------------------------------------------------------------------------------------------------------------------------------------------------------------------------------------------------------------------------------------------------------------------------------------------------------------------------------------------------------------------------------------------------------------------------------------------------------------------------------------------------------------------------------------------------------------------------------------------------------------------------------------------------------------------------------------------------------------------------------------------------------------------------------------------------------------------------------------------------------------------------------------------------------------------------------------------------------------------------------------------------------------------------------------------------------------------------------------------------------------------------------------------------------------------------------------------------------------------------------------------------------------------------------------------------------------------------------------------------------------------------------------------------------------------------------------------------------------------------------------------------------------------------------------------------------------------------------------------------------------------------------------------------------------------------------------------------------------------------------------------------------------------------------------------------------------------------------------------------------------------------------------------------------------------------------------------------------------------------------------------------------------------------------------------------------------------------------------------------------------------------------------------------------------------------------------------------------------------------------------------------------------------------------------------------------------------------------------------------------------------------------------------------------------------------------------------------------------------------------------------------------------------------------------------------------------------------------------------------------------------------------------------------------------------------------------------------------------------------------------------------------------------------------------------------------------------------------------------------------------------------------------------------------------------------------------------------------------------------------------------------------------------------------------------------------------------------------------------------------------------------------------------------------------------------------------------------------------------------------------------------------------------------------------------------------------------------------------------------------------------------------------------------------------------------------------------------------------------------------------------------------------------------------------------------------------------------------------------------------------------------------------------------------------------------------------------------------------------------------------------------------------------------------------------------------------------------------------------------------------------------------------------------------------------------------------------------------------------------------------------------------------------------------------------------------------------------------------------------------------------------------------------------------------------------------------------------------------------------------------------------------------------------------------------------------------------------------------------------------------------------------------------------------------------------------------------------------------------------------------------------------------------------------------------------------------------------------------------------------------------------------------------------------------------------------------------------------------------------------------------------------------------------------------------------------------------------------------------------------------------------------------------------------------------------------------------------------------------------------------------------------------------------------------------------------------------------------------------------------------------------------------------------------------------------------------------------------------------------------------------------------------------------------------------------------------------------------------------------------------------------------------------------------------------------------------------------------------------------------------------------------------------------------------------------------------------------------------------------------------------------------------------------------------------------------------------------------------------------------------------------------------------------------------------------------------------------------------------------------------------------------------------------------------------------------------------------------------------------------------------------------------------------------------------------------------------------------------------------------------------------------------------------------------------------------------------------------------------------------------------------------------------------------------------------------------------------------------------------------------------------------------------------------------------------------------------------------------------------------------------------------------------------------------------------------------------------------------------------------------------------------------------------------------------------------------------------------------------------------------------------------------------------------------------------------------------------------------------------------------------------------------------------------------------------------------------------------------------------------------------------------------------------------------------------------------------------------------------------------------------------------------------------------------------------------------------------------------------------------------------------------------------------------------------------------------------------------------------------------------------------------------------------------------------------------------------------------------------------------------------------------------------------------------------------------------------------------------------------------------------------------|-----|-----|-----|-----|-----|-----|-----|--|
| conservation | ●●●●●●●●●●●●●●●●●●●●●●●●●●●●●●●●●●●●●●●●●●●●●●●●●●●●●●●●●●●●●●●●●●●●●●●●●●●●●●●●●●●●●●●●●●●●●●●●●●●●●●●●●●●●●●●●●●●●●●●●●●●●●●●●●●●●●●●●●●●●●●●●●●●●●●●●●●●●●●●●●●●●●●●●●●●●●●●●●●●●●●●●●●●●●●●●●●●●●●●●●●●●●●●●●●●●●●●●●●●●●●●●●●●●●●●●●●●●●●●●●●●●●●●●●●●●●●●●●●●●●●●●●●●●●●●●●●●●●●●●●●●●●●●●●●●●●●●●●●●●●●●●●●●●●●●●●●●●●●●●●●●●●●●●●●●●●●●●●●●●●●●●●●●●●●●●●●●●●●●●●●●●●●●●●●●●●●●●●●●●●●●●●●●●●●●●●●●●●●●●●●●●●●●●●●●●●●●●●●●●●●●●●●●●●●●●●●●●●●●●●●●●●●●●●●●●●●●●●●●●●●●●●●●●●●●●●●●●●●●●●●●●●●●●●●●●●●●●●●●●●●●●●●●●●●●●●●●●●●●●●●●●●●●●●●●●●●●●●●●●●●●●●●●●●●●●●●●●●●●●●●●●●●●●●●●●●●●●●●●●●●●●●●●●●●●●●●●●●●●●●●●●●●●●●●●●●●●●●●●●●●●●●●●●●●●●●●●●●●●●●●●●●●●●●●●●●●●●●●●●●●●●●●●●●●●●●●●●●●●●●●●●●●●●●●●●●●●●●●●●●●●●●●●●●●●●●●●●●●●●●●●●●●●●●●●●●●●●●●●●●●●●●●●●●●●●●●●●●●●●●●●●●●●●●●●●●●●●●●●●●●●●●●●●●●●●●●●●●●●●●●●●●●●●●●●●●●●●●●●●●●●●●●●●●●●●●●●●●●●●●●●●●●●●●●●●●●●●●●●●●●●●●●●●●●●●●●●●●●●●●●●●●●●●●●●●●●●●●●●●●●●●●●●●●●●●●●●●●●●●●●●●●●●●●●●●●●●●●●●●●●●●●●●●●●●●●●●●●●●●●●●●●●●●●●●●●●●●●●●●●●●●●●●●●●●●●●●●●●●●●●●●●●●●●●●●●●●●●●●●●●●●●●●●●●●●●●●●●●●●●●●●●●●●●●●●●●●●●●●●●●●●●●●●●●●●●●●●●●●●●●●●●●●●●●●●●●●●●●●●●●●●●●●●●●●●●●●●●●●●●●●●●●●●●●●●●●●●●●●●●●●●●●●●●●●●●●●●●●●●●●●●●●●●●●●●●●●●●●●●●●●●●●●●●●●●●●●●●●●●●●●●●●●●●●●●●●●●●●●●●●●●●●●●●●●●●●●●●●●●●●●●●●●●●●●●●●●●●●●●●●●●●●●●●●●●●●●●●●●●●●●●●●●●●●●●●●●●●●●●●●●●●●●●●●●●●●●●●●●●●●●●●●●●●●●●●●●●●●●●●●●●●●●●●●●●●●●●●●●●●●●●●●●●●●●●●●●●●●●●●●●●●●●●●●●●●●●●●●●●●●●●●●●●●●●●●●●●●●●●●●●●●●●●●●●●●●●●●●●●●●●●●●●●●●●●●●●●●●●●●●●●●●●●●●●●●●●●●●●●●●●●●●●●●●●●●●●●●●●●●●●●●●●●●●●●●●●●●●●●●●●●●●●●●●●●●●●●●●●●●●●●●●●●●●●●●●●●●●●●●●●●●●●●●●●●●●●●●●●●●●●●●●●●●●●●●●●●●●●●●●●●●●●●●●●●●●●●●●●●●●●●●●●●●●●●●●●●●●●●●●●●●●●●●●●●●●●●●●●●●●●●●●●●●●●●●●●●●●●●●●●●●●●●●●●●●●●●●●●●●●●●●●●●●●●●●●●●●●●●●●●●●●●●●●●●●●●●●●●●●●●●●●●●●●●●●●●●●●●●●●●●●●●●●●●●●●●●●●●●●●●●●●●●●●●●●●●●●●●●●●●●●●●●●●●●●●●●●●●●●●●●●●●●●●●●●●●●●●●●●●●●●●●●●●●●●●●●●●●●●●●●●●●●●●●●●●●●●●●●●●●●●●●●●●●●●●●●●●●●●●●●●●●●●●●●●●●●●●●●●●●●●●●●●●●●●●●●●●●●●●●●●●●●●●●●●●●●●●●●●●●●●●●●●●●●●●●●●●●●●●●●●●●●●●●●●●●●●●●●●●●●●●●●●●●●●●●●●●●●●●●●●●●●●●●●●●●●●●●●●●●●●●●●●●●●●●●●●●●●●●●●●●●●●●●●●●●●●●●●●●●●●●●●●●●●●●●●●●●●●●●●●●●●●●●●●●●●●●●●●●●●●●●●●●●●●●●●●●●●●●●●●●●●●●●●●●●●●●●●●●●●●●●●●●●●●●●●●●●●●●●●●●●●●●●●●●●●●●●●●●●●●●●●●●●●●●●●●●●●●●●●●●●●●●●●●●●●●●●●●●●●●●●●●●●●●●●●●●●●●●●●●●●●●●●●●●●●●●●●●●●●●●●●●●●●●●●●●●●●●●●●●●●●●●●●●●●●●●●●●●●●●●●●●●●●●●●●●●●●●●●●●●●●●●●●●●●●●●●●●●●●●●●●●●●●●●●●●●●●●●●●●●●●●●●●●●●●●●●●●●●●●●●●●●●●●●●●●●●●●●●●●●●●●●●●●●●●●●●●●●●●●●●●●●●●●●●●●●●●●●●●●●●●●●●●●●●●●●●●●●●●●●●●●●●●●●●●●●●●●●●●●●●●●●●●●●●●●●●●●●●●●●●●●●●●●●●●●●●●●●●●●●●●●●●●●●●●●●●●●●●●●●●●●●●●●●●●●●●●●●●●●●●●●●●●●●●●●●●●●●●●●●●●●●●●●●●●●●●●●●●●●●●●●●●●●●●●●●●●●●●●●●●●●●●●●●●●●●●●●●●●●●●●●●●●●●●●●●●●●●●●●●●●●●●●●●●●●●●●●●●●●●●●●●●●●●●●●●●●●●●●●●●●●●●●●●●●●●●●●●●●●●●●●●●●●●●●●●●●●●●●●●●●●●●●●●●●●●●●●●●●●●●●●●●●●●●●●●●●●●●●●●●●●●●●●●●●●●●●●●●●●●●●●●●●●●●●●●●●●●●●●●●●●●●●●●●●●●●●●●●●●●●●●●●●●●●●●●●●●●●●●●●●●●●●●●●●●●●●●●●●●●●●●●●●●●●●●●●●●●●●●●●●●●●●●●●●●●●●●●●●●●●●●●●●●●●●●●●●●●●●●●●●●●●●●●●●●●●●●●●●●●●●●●●●●●●●●●●●●●●●●●●●●●●●●●●●●●●●●●●●●●●●●●●●●●●●●●●●●●●●●●●●●●●●●●●●●●●●●●●●●●●●●●●●●●●●●●●●●●●●●●●●●●●●●●●●●●●●●●●●●●●●●●●●●●●●●●●●●●●●●●●●●●●●●●●●●●●●●●●●●●●●●●●●●●●●●●●●●●●●●●●●●●●●●●●●●●●●●●●●●●●●●●●●●●●●●●●●●●●●●●●●●●●●●●●●●●●●●●●●●●●●●●●●●●●●●●●●●●●●●●●●●●●●●●●●●●●●●●●●●●●●●●●●●●●●●●●●●●●●●●●●●●●●●●●●●●●●●●●●●●●●●●●●●●●●●●●●●●●●●●●●●●●●●●●●●●●●●●●●●●●●●●●●●●●●●●●●●●●●●●●●●●●●●●●●●●●●●●●●●●●●●●●●●●●●●●●●●●●●●●●●●●●●●●●●●●●●●●●●●●●●●●●●●●●●●●●●●●●●●●●●●●●●●●●●●●●●●●●●●●●●●●●●●●●●●●●●●●●●●●●●●●●●●●●●●●●●●●●●●●●●●●●●●●●●●●●●●●●●●●●●●●●●●●●●●●●●●●●●●●●●●●●●●●●●●●●●●●●●●●●●●●●●●●●●●●●●●●●●●●●●●●●●●●●●●●●●●●●●●●●●●●●●●●●●●●●●●●●●●●●●●●●●●●●●●●●●●●●●●●●●●●●●●●●●●●●●●●●●●●●●●●●●●●●●●●●●●●●●●●●●●●●●●●●●●●●●●●●●●●●●●●●●●●●●●●●●●●●●●●●●●●●●●●●●●●●●●●●●●●●●●●●●●●●●●●●●●●●●●●●●●●●●●●●●●●●●●●●●●●●●●●●●●●●●●●●●●●●●●●●●●●●●●●●●●●●●●●●●●●●●●●●●●●●●●●●●●●●●●●●●●●●●●●●●●●●●●●●●●●●●●●●●●●●●●●●●●●●●●●●●●●●●●●●●●●●●●●●●●●●●●●●●●●●●●●●●●●●●●●●●●●●●●●●●●●●●●●●●●●●●●●●●●●●●●●●●●●●●●●●●●●●●●●●●●●●●●●●●●●●●●●●●●●●●●●●●●●●●●●●●●●●●●●●●●●●●●●●●●●●●●●●●●●●●●●●●●●●●●●●●●●●●●●●●●●●●●●●●●●●●●●●●●●●●●●●●●●●●●●●●●●●●●●●●●●●●●●●●●●●●●●●●●●●●●●●●●●●●●●●●●●●●●●●●●●●●●●●●●●●●●●●●●●●●●●●●●●●●●●●●●●●●●●●●●●●●●●●●●●●●●●●●●●●●●●●●●●●●●●●●●●●●●●●●●●●●●●●●●●●●●●●●●●●●●●●●●●●●●●●●●●●●●●●●●●●●●●●●●●●●●●●●●●●●●●●●●●●●●●●●●●●●●●●●●●●●●●●●●●●●●●●●●●●●●●●●●●●●●●●●●●●●●●●●●●●●●●●●●●●●●●●●●●●●●●●●●●●●●●●●●●●●●●●●●●●●●●●●●●●●●●●●●●●●●●●●●●●●●●●●●●●●●●●●●●●●●●●●●●●●●●●●●●●●●●●●●●●●●●●●●●●●●●●●●●●●●●●●●●●●●●●●●●●●●●●●●●●●●●●●●●●●●●●●●●●●●●●●●●●●●●●●●●●●●●●●●●●●●●●●●●●●●●●●●●●●●●●●●●●●●●●●●●●●●●●●●●●●●●●●●●●●●●●●●●●●●●●●●●●●●●●●●●●●●●●●●●●●●●●●●●●●●●●●●●●●●●●●●●●●●●●●●●●●●●●●●●●●●●●●●●●●●●●●●●●●●●●●●●●●●●●●●●●●●●●●●●●●●●●●●●●●●●●●●●●●●●●●●●●●●●●●●●●●●●●●●●●●●●●●●●●●●●●●●●●●●●●●●●●●●●●●●●●●●●●●●●●●●●●●●●●●●●●●●●●●●●●●●●●●●●●●●●●●●●●●●●●●●●●●●●●●●●●●●●●●●●●●●●●●●●●●●●●●●●●●●●●●●●●●●●●●●●●●●●●●●●●●●●●●●●●●●●●●●●●●●●●●●●●●●●●●●●●●●●●●●●●●●●●●●●●●●●●●●●●●●●●●●●●●●●●●●●●●●●●●●●●●●●●●●●●●●●●●●●●●●●●●●●●●●●●●●●●●●●●●●●●●●●●●●●●●●●●●●●●●●●●●●●●●●●●●●●●●●●●●●●●●●●●●●●●●●●●●●●●●●●●●●●●●●●●●●●●●●●●●●●●●●●●●●●●●●●●●●●●●●●●●●●●●●●●●●●●●●●●●●●●●●●●●●●●●●●●●●●●●●●●●●●●●●●●●●●●●●●●●●●●●●●●●●●●●●●●●●●●●●●●●●●●●●●●●●●●●●●●●●●●●●●●●●●●●●●●●●●●●●●●●●●●●●●●●●●●●●●●●●●●●●●●●●●●●●●●●●●●●●●●●●●●●●●●●●●●●●●●●●●●●●●●●●●●●●●●●●●●●●●●●●●●●●●●●●●●●●●●●●●●●●●●●●●●●●●●●●●●●●●●●●●●●●●●●●●●●●●●●●●●●●●●●●●●●●●●●●●●●●●●●●●●●●●●●●●●●●●●●●●●●●●●●●●●●●●●●●●●●●●●●●●●●●●●●●●●●●●●●●●●●●●●●●●●●●●●●●●●●●●●●●●●●●●●●●●●●●●●●●●●●●●●●●●●●●●●●●●●●●●●●●●●●●●●●●●●●●●●●●●●●●●●●●●●●●●●●●●●●●●●●●●●●●●●●●●●●●●●●●●●●●●●●●●●●●●●●●●●●●●●●●●●●●●●●●●●●●●●●●●●●●●●●●●●●●●●●●●●●●●●●●●●●●●●●●●●●●●●●●●●●●●●●●●●●●●●●●●●●●●●●●●●●●●●●●●●●●●●●●●●●●●●●●●●●●●●●●●●●●●●●●●●●●●●●●●●●●●●●●●●●●●●●●●●●●●●●●●●●●●●●●●●●●●●●●●●●●●●●●●●●●●●●●●●●●●●●●●●●●●●●●●●●●●●●●●●●●●●●●●●●●●●●●●●●●●●●●●●●●●●●●●●●●●●●●●●●●●●●●●●●●●●●●●●●●●●●●●●●●●●●●●●●●●●●●●●●●●●●●●●●●●●●●●●●●●●●●●●●●●●●●●●●●●●●●●●●●●●●●●●●●●●●●●●●●●●●●●●●●●●●●●●●●●●●●●●●●●●●●●●●●●●●●●●●●●●●●●●●●●●●●●●●●●●●●●●●●●●●●●●●●●●●●●●●●●●●●●●●●●●●●●●●●●●●●●●●●●●●●●●●●●●●●●●●●●●●●●●●●●●●●●●●●●●●●●●●●●●●●●●●●●●●●●●●●●●●●●●●●●●●●●●●●●●●●●●●●●●●●●●●●●●●●●●●●●●●●●●●●●●●●●●●●●●●●●●●●●●●●●●●●●●●●●●●●●●●●●●●●●●●●●●●●●●●●●●●●●●●●●●●●●●●●●●●●●●●●●●●●●●●●●●●●●●●●●●●●●●●●●●●●●●●●●●●●●●●●●●●●●●●●●●●●●●●●●●●●●●●●●●●●●●●●●●●●●●●●●●●●●●●●●●●●●●●●●●●●●●●●●●●●●●●●●●●●●●●●●●●●●●●●●●●●●●●●●●●●●●●●●●●●●●●●●●●●●●●●●●●●●●●●●●●●●●●●●●●●●●●●●●●●●●●●●●●●●●●●●●●●●●●●●●●●●●●●●●●●●●●●●●●●●●●●●●●●●●●●●●●●●●●●●●●●●●●●●●●●●●●●●●●●●●●●●●●●●●●●●●●●●●●●●●●●●●●●●●●●●●●●●●●●●●●●●●●●●●●●●●●●●●●●●●●●●●●●●●●●●●●●●●●●●●●●●●●●●●●●●●●●●●●●●●●●●●●●●●●●●●●●●●●●●●●●●●●●●●●●●●●●●●●●●●●●●●●●●●●●●●●●●●●●●●●●●●●●●●●●●●●●●●●●●●●●●●●●●●●●●●●●●●●●●●●●●●●●●●●●●●●●●●●●●●●●●●●●●●●●●●●●●●●●●●●●●●●●●●●●●●●●●●●●●●●●●●●●●●●●●●●●●●●●●●●●●●●●●●●●●●●●●●●●●●●●●●●●●●●●●●●●●●●●●●●●●●●●●●●●●●●●●●●●●●●●●●●●●●●●●●●●●●●●●●●●●●●●●●●●●●●●●●●●●●●●●●●●●●●●●●●●●●●●●●●●●●●●●●●●●●●●●●●●●●●●●●●●●●●●●●●●●●●●●●●●●●●●●●●●●●●●●●●●●●●●●●●●●●●●●●●●●●●●●●●●●●●●●●●●●●●●●●●●●●●●●●●●●●●●●●●●●●●●●●●●●●●●●●●●●●●●●●●●●●●●●●●●●●●●●●●●●●●●●●●●●●●●●●●●●●●●●●●●●●●●●●●●●●●●●●●●●●●●●●●●●●●●●●●●●●●●●●●●●●●●●●●●●●●●●●●●●●●●●●●●●●●●●●●●●●●●●●●●●●●●●●●●●●●●●●●●●●●●●●●●●●●●●●●●●●●●●●●●●●●●●●●●●●●●●●●●●●●●●●●●●●●●●●●●●●●●●●●●●●●●●●●●●●●●●●●●●●●●●●●●●●●●●●●●●●●●●●●●●●●●●●●●●●●●●●●●●●●●●●●●●●●●●●●●●●●●●●●●●●●●●●●●●●●●●●●●●●●●●●●●●●●●●●●●●●●●●●●●●●●●●●●●●●●●●●●●●●●●●●●●●●●●●●●●●●●●●●●●●●●●●●●●●●●●●●●●●●●●●●●●●●●●●●●●●●●●●●●●●●●●●●●●●●●●●●●●●●●●●●●●●●●●●●●●●●●●●●●●●●●●●●●●●●●●●●●●●●●●●●●●●●●●●●●●●●●●●●●●●●●●●●●●●●●●●●●●●●●●●●●●●●●●●●●●●●●●●●●●●●●●●●●●●●●●●●●●●●●●●●●●●●●●●●●●●●●●●●●●●●●●●●●●●●●●●●●●●●●●●●●●●●●●●●●●●●●●●●●●●●●●●●●●●●●●●●●●●●●●●●●●●●●●●●●●●●●●●●●●●●●●●●●●●●●●●●●●●●●●●●●●●●●●●●●●●●●●●●●●●●●●●●●●●●●●●●●●●●●●●●●●●●●●●●●●●●●●●●●●●●●●●●●●●●●●●●●●●●●●●●●●●●●●●●●●●●●●●●●●●●●●●●●●●●●●●●●●●●●●●●●●●●●●●●●●●●●●●●●●●●●●●●●●●●●●●●●●●●●●●●●●●●●●●●●●●●●●●●●●●●●●●●●●●●●●●●●●●●●●●●●●●●●●●●●●●●●●●●●●●●●●●●●●●●●●●●●●●●●●●●●●●●●●●●●●●●●●●●●●●●●●●●●●●●●●●●●●●●●●●●●●●●●●●●●●●●●●●●●●●●●●●●●●●●●●●●●●●●●●●●●●●●●●●●●●●●●●●●●●●●●●●●●●●●●●●●●●●●●●●●●●●●●●●●●●●●●●●●●●●●●●●●●●●●●●●●●●●●●●●●●●●●●●●●●●●●●●●●●●●●●●●●●●●●●●●●●●●●●●●●●●●●●●●●●●●●●●●●●●●●●●●●●●●●●●●●●●●●●●●●●●●●●●●●●●●●●●●●●●●●●●●●●●●●●●●●●●●●●●●●●●●●●●●●●●●●●●●●●●●●●●●●●●●●●●●●●●●●●●●●●●●●●●●●●●●●●●●●●●●●●●●●●●●●●●●●●●●●●●●●●●●●●●●●●●●●●●●●●●●●●●●●●●●●●●●●●●●●●●●●●●●●●●●●●●●●●●●●●●●●●●●●●●●●●●●●●●●●●●●●●●●●●●●●●●●●●●●●●●●●●●●●●●●●●●●●●●●●●●●●●●●●●●●●●●●●●●●●●●●●●●●●●●●●●●●●●●●●●●●●●●●●●●●●●●●●●●●●●●●●●●●●●●●●●●●●●●●●●●●●●●●●●●●●●●●●●●●●●●●●●●●●●●●●●●●●●●●●●●●●●●●●●●●●●●●●●●●●●●●●●●●●●●●●●●●●●●●●●●●●●●●●●●●●●●●●●●●●●●●●●●●●●●●●●●●●●●●●●●●●●●●●●●●●●●●●●●●●●●●●●●●●●●●●●●●●●●●●●●●●●●●●●●●●●●●●●●●●●●●●●●●●●●●●●●●●●●●●●●●●●●●●●●●●●●●●●●●●●●●●●●●●●●●●●●●●●●●●●●●●●●●●●●●●●●●●●●●●●●●●●●●●●●●●●●●●●●●●●●●●●●●●●●●●●●●●●●●●●●●●●●●●●●●●●●●●●●●●●●●●●●●●●●●●●●●●●●●●●●●●●●●●●●●●●●●●●●●●●●●●●●●●●●●●●●●●●●●●●●●●●●●●●●●●●●●●●●●●●●●●●●●●●●●●●●●●●●●●●●●●●●●●●●●●●●●●●●●●●●●●●●●●●●●●●●●●●●●●●●●●●●●●●●●●●●●●●●●●●●●●●●●●●●●●●●●●●●●●●●●●●●●●●●●●●●●●●●●●●●●●●●●●●●●●●●●●●●●●●●●●●●●●●●●●●●●●●●●●●●●●●●●●●●●●●●●●●●●●●●●●●●●●●●●●●●●●●●●●●●●●●●●●●●●●●●●●●●●●●●●●●●●●●●●●●●●●●●●●●●●●●●●●●●●●●●●●●●●●●●●●●●●●●●●●●●●●●●●●●●●●●●●●●●●●●●●●●●●●●●●●●●●●●●●●●●●●●●●●●●●●●●●●●●●●●●●●●●●●●●●●●●●●●●●●●●●●●●●●●●●●●●●●●●●●●●●●●●●●●●●●●●●●●●●●●●●●●●●●●●●●●●●●●●●●●●●●●●●●●●●●●●●●●●●●●●●●●●●●●●●●●●●●●●●●●●●●●●●●●●●●●●●●●●●●●●●●●●●●●●●●●●●●●●●●●●●●●●●●●●●●●●●●●●●●●●●●●●●●●●●●●●●●●●●●●●●●●●●●●●●●●●●●●●●●●●●●●●●●●●●●●●●●●●●●●●●●●●●●●●●●●●●●●●●●●●●●●●●●●●●●●●●●●●●●●●●●●●●●●●●●●●●●●●●●●●●●●●●●●●●●●●●●●●●●●●●●●●●●●●●●●●●●●●●●●●●●●●●●●●●●●●●●●●●●●●●●●●●●●●●●●●●●●●●●●●●●●●●●●●●●●●●●●●●●●●●●●●●●●●●●●●●●●●●●●●●●●●●●●●●●●●●●●●●●●●●●●●●●●●●●●●●●●●●●●●●●●●●●●●●●●●●●●●●●●●●●●●●●●●●●●●●●●●●●●●●●●●●●●●●●●●●●●●●●●●●●●●●●●●●●●●●●●●●●●●●●●●●●●●●●●●●●●●●●●●●●●●●●●●●●●●●●●●●●●●●●●●●●●●●●●●●●●●●●●●●●●●●●●●●●●●●●●●●●●●●●●●●●●●●●●●●●●●●●●●●●●●●●●●●●●●●●●●●●●●●●●●●●●●●●●●●●●●●●●●●●●●●●●●●●●●●●●●●●●●●●●●●●●●●●●●●●●●●●●●●●●●●●●●●●●●●●●●●●●●●●●●●●●●●●●●●●●●●●●●●●●●●●●●●●●●●●●●●●●●●●●●●●●●●●●●●●●●●●●●●●●●●●●●●●●●●●●●●●●●●●●●●●●●●●●●●●●●●●●●●●●●●●●●●●●●●●●●●●●●●●●●●●●●●●●●●●●●●●●●●●●●●●●●●●●●●●●●●●●●●●●●●●●●●●●●●●●●●●●●●●●●●●●●●●●●●●●●●●●●●●●●●●●●●●●●●●●●●●●●●●●●●●●●●●●●●●●●●●●●●●●●●●●●●●●●●●●●●●●●●●●●●●●●●●●●●●●●●●●●●●●●●●●●●●●●●●●●●●●●●●●●●●●●●●●●●●●●●●●●●●●●●●●●●●●●●●●●●●●●●●●●●●●●●●●●●●●●●●●●●●●●●●●●●●●●●●●●●●●●●●●●●●●●●●●●●●●●●●●●●●●●●●●●●●●●●●●●●●●●●●●●●●●●●●●●●●●●●●●●●●●●●●●●●●●●●●●●●●●●●●●●●●●●●●●●●●●●●●●●●●●●●●●●●●●●●●●●●●●●●●●●●●●●●●●●●●●●●●●●●●●●●●●●●●●●●●●●●●●●●●●●●●●●●●●●●●●●●●●●●●●●●●●●●●●●●●●●●●●●●●●●●●●●●●●●●●●●●●●●●●●●●●●●●●●●●●●●●●●●●●●●●●●●●●●●●●●●●●●●●●●●●●●●●●●●●●●●●●●●●●●●●●●●●●●●●●●●●●●●●●●●●●●●●●●●●●●●●●●●●●●●●●●●●●●●●●●●●●●●●●●●●●●●●●●●●●●●●●●●●●●●●●●●●●●●●●●●●●●●●●●●●●●●●●●●●●●●●●●●●●●●●●●●●●●●●●●●●●●●●●●●●●●●●●●●●●●●●●●●●●●●●●●●●●●●●●●●●●●●●●●●●●●●●●●●●●●●●●●●●●●●●●●●●●●●●●●●●●●●●●●●●●●●●●●●●●●●●●●●●●●●●●●●●●●●●●●●●●●●●●●●●●●●●●●●●●●●●●●●●●●●●●●●●●●●●●●●●●●●●●●●●●●●●●●●●●●●●●●●●●●●●●●●●●●●●●●●●●●●●●●●●●●●●●●●●●●●●●●●●●●●●●●●●●●●●●●●●●●●●●●●●●●●●●●●●●●●●●●●●●●●●●●●●●●●●●●●●●●●●●●●●●●●●●●●●●●●●●●●●●●●●●●●●●●●●●●●●●●●●●●●●●●●●●●●●●●●●●●●●●●●●●●●●●●●●●●●●●●●●●●●●●●●●●●●●●●●●●●●●●●●●●●●●●●●●●●●●●●●●●●●●●●●●●●●●●●●●●●●●●●●●●●●●●●●●●●●●●●●●●●●●●●●●●●●●●●●●●●●●●●●●●●●●●●●●●●●●●●●●●●●●●●●●●●●●●●●●●●●●●●●●●●●●●●●●●●●●●●●●●●●●●●●●●●●●●●●●●●●●●●●●●●●●●●●●●●●●●●●●●●●●●●●●●●●●●●●●●●●●●●●●●●●●●●●●●●●●●●●●●●●●●●●●●●●●●●●●●●●●●●●●●●●●●●●●●●●●●●●●●●●●●●●●●●●●●●●●●●●●●●●●●●●●●●●●●●●●●●●●●●●●●●●●●●●●●●●●●●●●●●●●●●●●●●●●●●●●●●●●●●●●●●●●●●●●●●●●●●●●●●●●●●●●●●●●●●●●●●●●●●●●●●●●●●●●●●●●●●●●●●●●●●●●●●●●●●●●●●●●●●●●●●●●●●●●●●●●●●●●●●●●●●●●●●●●●●●●●●●●●●●●●●●●●●●●●●●●●●●●●●●●●●●●●●●●●●●●●●●●●●●●●●●●●●●●●●●●●●●●●●●●●●●●●●●●●●●●●●●●●●●●●●●●●●●●●●●●●●●●●●●●●●●●●●●●●●●●●●●●●●●●●●●●●●●●●●●●●●●●●●●●●●●●●●●●●●●●●●●●●●●●●●●●●●●●●●●●●●●●●●●●●●●●●●●●●●●●●●●●●●●●●●●●●●●●●●●●●●●●●●●●●●●●●●●●●●●●●●●●●●●●●●●●●●●●●●●●●●●●●●●●●●●●●●●●●●●●●●●●●●●●●●●●●●●●●●●●●●●●●●●●●●●●●●●●●●●●●●●●●●●●●●●●●●●●●●●●●●●●●●●●●●●●●●●●●●●●●●●●●●●●●●●●●●●●●●●●●●●●●●●●●●●●●●●●●●●●●●●●●●●●●●●●●●●●●●●●●●●●●●●●●●●●●●●●●●●●●●●●●●●●●●●●●●●●●●●●●●●●●●●●●●●●●●●●●●●●●●●●●●●●●●●●●●●●●●●●●●●●●●●●●●●●●●●●●●●●●●●●●●●●●●●●●●●●●●●●●●●●●●●●●●●●●●●●●●●●●●●●●●●●●●●●●●●●●●●●●●●●●●●●●●●●●●●●●●●●●●●●●●●●●●●●●●●●●●●●●●●●●●●●●●●●●●●●●●●●●●●●●●●●●●●●●●●●●●●●●●●●●●●●●●●●●●●●●●●●●●●●●●●●●●●●●●●●●●●●●●●●●●●●●●●●●●●●●●●●● |     |     |     |     |     |     |     |  |



|                                      |            |           |         |          |                |         |           |              |              |     |
|--------------------------------------|------------|-----------|---------|----------|----------------|---------|-----------|--------------|--------------|-----|
|                                      |            | 340       | 350     | 360      | 370            | 380     | 390       | 400          | 410          |     |
| conservation                         |            |           |         |          |                |         |           |              |              |     |
| <i>Callorhinchus milii</i>           | CTGAGAGAGA | TTCGAATC  | CTAGGCC | CTGCAAT  | CTTGACCCACAAA  | AGAGAG  | AGAGTAC   | AACACCAT     | CTGACTGAAAT  | 413 |
| <i>Alligator mississippiensis</i>    | ATTGGCTCCA | TCCAGACCT | TGGGGC  | CTTCAAC  | CTGCCCATGAACA  | AGCGGG  | AGCAGTAC  | AAACACCATTTT | TGAGTGAGAT   | 404 |
| <i>Anolis carolinensis</i>           | ATCAGTAACA | TCCAGACAT | TAGGCC  | CCTCCAAT | TGGATCTGGA     | AAAGCGG | AGCGGTAT  | AACACTATAAT  | TGAGTGAGAT   | 476 |
| <i>Astyanax mexicanus</i>            | ATAAAGAAGA | TCAATGTG  | CTCGGAG | CCGCCAAC | CTCCCAACTGCAG  | AGAGAG  | AGAGGTAC  | AAACACAATT   | CTGAGTCAGAT  | 407 |
| <i>Boleophthalmus pectinirostris</i> | TATGACAAGA | TGTTGTCT  | TGGGAC  | CTGCCAAC | CTGCCACCGCCG   | AAAGAG  | AGGAGTAC  | AAACACCATCTC | TAGCACCAT    | 428 |
| <i>Cynoglossus semilaevis</i>        | ATGGAAAAA  | TCAAGGTA  | CTGGGAG | CCGCCAAC | CTTGCGCCAGACG  | AAAGGA  | AGAGTAC   | AAACACCATCTC | TAGCACCAT    | 431 |
| <i>Danio rerio</i>                   | ATCAAAAAGA | TCAATGTC  | TGGAAG  | CCGCCAAC | CTCGCAATCACAG  | ACAGAG  | AGCTGTAC  | AAACACTATT   | CTGAGCCAGAT  | 530 |
| <i>Esox lucius</i>                   | ATCCACAAGA | TCAACATT  | CTGGGTC | CAGCTAAC | CTTCTGTCAGCAG  | AAAGAA  | TGAGTAC   | AATCGCAT     | CTTAGTGAAAT  | 419 |
| <i>Fundulus heteroclitus</i>         | ATTAAAAAGA | TCACGTCA  | CTGGGAG | TGCAAC   | CTTCCACTTGCTG  | AACGAG  | AGGAGTATA | AACACCATCT   | TAGCACCAT    | 437 |
| <i>Gekko japonicus</i>               | ATCCGCTCCG | TCCAAACAT | TGGGGC  | CTTCTAAT | TACCCATGGATA   | AACGAC  | AACTGTAC  | AAACACCATCTT | TGAGTGAGAT   | 416 |
| <i>Haplochromis burtoni</i>          | ATGGAAAAGA | TCAAGCTA  | CTCGGTG | CTGCCAAC | CTTCTCCCGGAAG  | AAAGAG  | AGGAGTATA | AACACCATCT   | TGAGCACCAT   | 428 |
| <i>Hippocampus comes</i>             | ATGAGCAACG | TCCAGACCT | TGGGAG  | CCGCCAAC | CTGCCCTCGGAAG  | AAAGAG  | GAGAGTAC  | AAACACCATCTT | TAGCACCAT    | 413 |
| <i>Ictalurus punctatus</i>           | ATCAAAAAGA | TGATGTCT  | TAGGAC  | CTGCCAAC | CTCCCTACCACAG  | AGCGAG  | AGGTACA   | AATTTGATT    | CTGAGTCAGAT  | 416 |
| <i>Larimichthys crocea</i>           | ATGAAAAAGA | TCACGCTT  | CTGGGAG | CTGCCAAC | CTGGCTCCAAAAG  | AAAGAG  | AGGAGTAC  | AAACACAATT   | CTGAGCACCAT  | 422 |
| <i>Lates calcarifer</i>              | ATGGAAAAGA | TCATGATG  | CTAGGAG | CTGCCAAC | CTGCTCCAGAAAAG | AAAGAG  | AGGAGTAC  | AAACACCATCTC | TAGCACCAT    | 425 |
| <i>Latimeria chalumnae</i>           | ATTAGACAGA | TTAGAGTC  | CTAGGAG | TGGCTAAT | TAAAAGTAGAAG   | AAAGAC  | AAAAGTAC  | AAACACTTTAT  | TGAGCCAAAT   | 398 |
| <i>Lepisosteus oculatus</i>          | ATAAAGAAGA | TCAGTGTC  | CTGGGAG | CAGCTAAC | CTCAACACCACGG  | AGCGAA  | AGAAGTACA | AAACACCATCTT | TGAGTGACAT   | 404 |
| <i>Macaca fascicularis</i>           | ATCGGAGCTG | TGGGCACC  | CTGGGCT | CTGCCAAC | CTGCCCTGGCTA   | AGCGGC  | AGCAGTACA | AATGCCCTGT   | TAGCAACAT    | 443 |
| <i>Manacus vitellinus</i>            | ATCGGCTCCA | TCCAGACC  | CTGGGAC | CCTCCAAC | CTGCCCTGGACA   | AGAGAG  | AGCAGTACA | AAACACCATCTC | TGAGCGACAT   | 401 |
| <i>Mus musculus</i>                  | ATCGGATCTA | TTCGGACC  | CTAGGAC | CTGCCAAT | CTGCCCTGGCCC   | AGCGGC  | AGCAGTACA | AACTCTCTG    | TAGCAACAT    | 455 |
| <i>Neolamprologus brichardi</i>      | ATGGAAAAGA | TCAAGCAC  | CTTGGTG | CTGCCAAC | CTTCTACAGGAAG  | AAAGAG  | AGGAGTATA | AACACCATCT   | TGAGCACCAT   | 428 |
| <i>Oncorhynchus mykiss</i>           | CTCAAGAAGA | TCAACATC  | CTGGGAG | CGGCTAAC | CTACCTGCGAGAG  | AAAGAA  | TGAGTACA  | AAAGTCATAC   | TAGCAAGAT    | 419 |
| <i>Oreochromis niloticus</i>         | ATGGAAAAGA | TCAAGCTA  | CTGGTG  | CTGCCAAC | CTTCTCCCGGAAG  | AAAGAG  | AGAAGTATA | AAACACCATCTT | TGAGCACCAT   | 428 |
| <i>Poecilia formosa</i>              | ATTGAAAAGA | TCAAGTCA  | CTGGGAG | CTGCCAAC | CTTCCACAGGCTG  | AACGAG  | AGGAGTATA | AACACCATCT   | TGAGCACCAT   | 434 |
| <i>Poecilia latipinna</i>            | ATTGAAAAGA | TCAAGTCA  | CTGGGAG | CTGCCAAC | CTTCCACAGGCTG  | AACGAG  | AGGAGTATA | AACACCATCT   | TGAGCACCAT   | 434 |
| <i>Pseudopodoces humilis</i>         | ATTGGATCCA | TCCAGACCT | TGGGAC  | CCTCCAAC | CTGCCCTGGAGAT  | GAGAG   | AGCAGTATA | AAACACCATCTC | TGAGTGACAT   | 401 |
| <i>Pundamilia nyererei</i>           | ATGGAAAAGA | TCATGCTA  | CTGGTG  | CTGCCAAC | CTTCTCCCGGAAG  | AAAGAG  | AGAAGTATA | AAACACCATCTT | TGAGCACCAT   | 428 |
| <i>Pygocentrus nattereri</i>         | ATCAAAAAGA | TCAATGTG  | CTGGGAC | CTGCCAAC | CTCGTTCAAACGG  | AAAGAG  | AGAAGTACA | AATACCATT    | TTTGAGTCAGAT | 401 |
| <i>Python bivittatus</i>             | ATCAGCTCCA | TTCAGACC  | CTGGGCC | CTTCCAAT | TACCAATGAACA   | AGCGAC  | ACGAGTATA | AATACTGTT    | CTGAGTGAGAT  | 407 |
| <i>Rattus norvegicus</i>             | ATCGGATCCG | TACAGACC  | CTAGGAC | CTGCCAAC | CTGCCCTGACCC   | AGCGGT  | GCAGTACA  | AACTCTCTG    | TAGCAACAT    | 458 |
| <i>Scleropages formosus</i>          | ATAAAGGGTA | TCAGTATC  | CTCGGCC | CTGCTAAT | CTAGCTCCAGCAG  | AGAGAG  | AGAAGTACA | AAACAGCATT   | CTGAGTAAGAT  | 404 |
| <i>Sinocyclocheilus anshuiensis</i>  | ATCAATAATA | TCAATGTT  | CTGGGAC | CCGCCAAT | CTCCCAACTGCTG  | AGAGAG  | AGAAGTACA | AATACATT     | CTGAGCCAGAT  | 404 |
| <i>Xenopus tropicalis</i>            | ATCAGTTCTA | TAAAGACC  | CTGGGAC | CTCAAACT | TGAACCTGACTG   | CAAGAG  | AGGAGTATA | AAACACCATCTT | TAGCAGAT     | 404 |
| <i>Lipotes vexillifer</i>            | ATCAGTGCCG | TGCGCACC  | CTGGGCC | CCGCCAAC | CTGCCCTGGAGG   | AGCGGC  | AGCAGTACA | AACTCTCTG    | TAGCAACAT    | 464 |
| <i>Orcinus orca</i>                  | ATCAGTGCCG | TGCGCACC  | CTGGGCC | CTGCCAAC | CTGCCCTGGAGG   | AGCGGC  | AGCAGTACA | AACTCTCTG    | TAGCAACAT    | 449 |
| <i>Homo sapiens</i>                  | ATCGGAGCTG | TGCGCACC  | CTGGGCT | CTGCCAAC | CTGCCCTGGCTA   | AGCGGC  | AGCAGTACA | AAACGCCCTG   | TAGCAACAT    | 440 |

|                                      |                  |              |                      |                 |                                |                              |                              |                              |     |     |
|--------------------------------------|------------------|--------------|----------------------|-----------------|--------------------------------|------------------------------|------------------------------|------------------------------|-----|-----|
|                                      |                  | 420          | 430                  | 440             | 450                            | 460                          | 470                          | 480                          | 490 |     |
| conservation                         |                  |              |                      |                 |                                |                              |                              |                              |     |     |
| <i>Callorhinchus milii</i>           | GGAT             | AATATCTATTTC | CACAGCGAAGGT         | GTGTCTCCCCAAGCC | AAGAGAATATCACTAAGT             | GCTGGTCGCTTTGAACCGGATC       |                              |                              |     | 493 |
| <i>Alligator mississippiensis</i>    | GGACAATATCTATTTC | CACTGCCAAGGT | GTGTCTCCACACCAAGATG  | .....           | TCCAACCTGCTGGTCATTGGAACCAAGAGG |                              |                              |                              |     | 478 |
| <i>Anolis carolinensis</i>           | GGACAACATCTATTTC | CACTTCCAAGGT | GTGTCTACCAAAACCAGACC | .....           | TCCAATTGCTGGGCTCTAGAACCAAGATA  |                              |                              |                              |     | 550 |
| <i>Astyanax mexicanus</i>            | GGACAACATCTACTCC | ACGGCAAAAGT  | GTGTCTCT             | .....           | AAACCA                         | .....                        | GAGGAGTGCTGGGCTTTGGAACCTGAGC |                              |     | 475 |
| <i>Boleophthalmus pectinirostris</i> | GGACAACATTTACTCC | ACAGCCAAAGT  | CCACCCA              | .....           | CAAGAA                         | .....                        | AATGTTAGCTGGAGTCTGGAGCCAGAAC |                              |     | 496 |
| <i>Cynoglossus semilaevis</i>        | GGACAGTATCTATTCA | ACAGCAAAAGT  | GCATCCA              | .....           | TCCCCA                         | .....                        | AATGTCACTGGAGCCTAGAACCTGAAC  |                              |     | 499 |
| <i>Danio rerio</i>                   | GGACAGCATCTACTCC | ACTGCAAGGT   | GTGTCCC              | .....           | TCTCCA                         | .....                        | GAGGAATGCTGGTCTTTGGAGCCTGAGC |                              |     | 598 |
| <i>Esox lucius</i>                   | GTCTTCAATATACTCC | ACTGCCAAAGT  | GTGTCCA              | .....           | AAGCCT                         | .....                        | GAGGAATGCTGGTCTCTCGAGCCAGAGC |                              |     | 487 |
| <i>Fundulus heteroclitus</i>         | GGACAGTATTTATTCA | ACAGCTAAGGT  | GTACCCA              | .....           | CAGCCA                         | .....                        | AACATTAGCTGGAGCCTGGATCCTGAAC |                              |     | 505 |
| <i>Gekko japonicus</i>               | GGACAACATCTACTCA | ACTGCCAAAGT  | GTGCCACCAAACCAGAAC   | .....           | TCCAGCTGTTGGGCCCTTGATCCAGAGA   |                              |                              |                              |     | 490 |
| <i>Haplochromis burtoni</i>          | GGACAATATTTATTTC | GACATCTAAGGT | GCACCCA              | .....           | CAGCCA                         | .....                        | AACATCAGCTGGAGCTGGAACCTGAGC  |                              |     | 496 |
| <i>Hippocampus comes</i>             | GGACAGTATTTATTCA | ACCGCTAAAGT  | GCATCCG              | .....           | CAGCCC                         | .....                        | AACGTCACTGGAGCCTGGAACCTCATC  |                              |     | 481 |
| <i>Ictalurus punctatus</i>           | GGGCAGCATCTACTCC | ACGGCAAAAGT  | TATGTCC              | .....           | AAACCA                         | .....                        | GCGGAGTGCTGGTCTTTGGAGCCTGAGT |                              |     | 484 |
| <i>Larimichthys crocea</i>           | GGACAATATTTATTCA | ACAGCCAAAGT  | GCATCCA              | .....           | CAGCCA                         | .....                        | AACATAAGCTGGAGCCTGGAACCTGAAC |                              |     | 490 |
| <i>Lates calcarifer</i>              | GGACAATATTTATTCA | ACATCAAGGT   | GCATCCA              | .....           | GAGCCA                         | .....                        | AACGTAAGCTGGAGCTTGGAACCCCATC |                              |     | 493 |
| <i>Latimeria chalumnae</i>           | GGACAATATTTACTCC | ACTGCTAAAGT  | GTGTCCACCAAATCAAAGT  | .....           | ACTGGCTGCTGGTCCCTGGAACCTGATC   |                              |                              |                              |     | 472 |
| <i>Lepisosteus oculatus</i>          | GGACAGTATTTATTCT | ACTGCTAATGT  | GTGTCCACCTGGAGAGAAT  | .....           | ATTAAGTGCTGGTCCCTTGAGCCGACA    |                              |                              |                              |     | 478 |
| <i>Macaca fascicularis</i>           | GAGCAGGATCTACTCC | ACGGCAAGGT   | TCTGCC               | .....           | TCCCCA                         | ACAAGACT                     | .....                        | GCCACCTGCTGGTCCCTGGACCCAGACC |     | 517 |
| <i>Manacus vitellinus</i>            | GGACAAGATCTACTCC | ACGGCAAGGT   | GTGCTGCCCAAC         | .....           | .....                          | GGCACCTGCTGGGATCTGGAGCCAGACC |                              |                              |     | 469 |
| <i>Mus musculus</i>                  | GAGCAGAATCTACTCC | ACTGGCAAGGT  | CTGCTTCCCCAACAAGACT  | .....           | GCCACCTGCTGGTCCCTTGACCCAGAGC   |                              |                              |                              |     | 529 |
| <i>Neolamprologus brichardi</i>      | GGACAATATTTATTTC | GACATCTAAGGT | GCACCCA              | .....           | CAGCCA                         | .....                        | AACATCAGCTGGAGTCTGGAACCTGAGC |                              |     | 496 |
| <i>Oncorhynchus mykiss</i>           | GTCTGAAATATACTCT | ACGGCCAAAGT  | GTGTCCA              | .....           | AAGACT                         | .....                        | AATGAATGCTGGTCTATTGAGCCAGAGC |                              |     | 487 |
| <i>Oreochromis niloticus</i>         | GGACAATATTTATTTC | GACATCTAAGGT | GCACCCA              | .....           | CAGCCA                         | .....                        | AACATCAGCTGGAGTCTGGAACCTGAGC |                              |     | 496 |
| <i>Poecilia formosa</i>              | GGACAGCATTTATTCA | ACAGCTAAGGT  | GTACCCA              | .....           | CAGCCA                         | .....                        | GACATAAGCTGGAGCCTGGAACCTGAAC |                              |     | 502 |
| <i>Poecilia latipinna</i>            | GGACAGCATTTATTCA | ACAGCTAAGGT  | GTACCCA              | .....           | CAGCCA                         | .....                        | GACATAAGCTGGAGCCTGGAACCTGAAC |                              |     | 502 |
| <i>Pseudopodoces humilis</i>         | GGACAAAATCTACTCC | ACGGCCAAAGT  | GTGCTGCCCAAT         | .....           | .....                          | GGCACCTGCTGGGATCTGGAGCCAGACC |                              |                              |     | 469 |
| <i>Pundamilia nyererei</i>           | GGACAATATTTATTTC | GACATCTAAGGT | GCACCCA              | .....           | CAGCCA                         | .....                        | AACATCAGCTGGAGTCTGGAACCTGAGC |                              |     | 496 |
| <i>Pygocentrus nattereri</i>         | GGACAACATCTACTCC | ACTGCCAAAGT  | GTGTCTCT             | .....           | AAAGAA                         | .....                        | GGAGAGTGCTGGTCTTTGGAACCTGAGT |                              |     | 469 |
| <i>Python bivittatus</i>             | GGACAACATCTACTCC | ACTTCCAAGT   | TTTGTCTACCAAACCAGAGC | .....           | TCCAGCTGCTGGGCTTTAGAGCCAGATA   |                              |                              |                              |     | 481 |
| <i>Rattus norvegicus</i>             | GAGCAGAATCTACTCC | ACGGCAAGGT   | CTGCTTCCCCAACAAGACT  | .....           | GCCACCTGCTGGTCCCTTGACCCAGAGC   |                              |                              |                              |     | 532 |
| <i>Scleropages formosus</i>          | GGACAACATATACTCC | ACAGCAAAAGT  | GTGCTCCCCAGGACAGGAG  | .....           | ATAAACTGCTGGTCAATTGGAGCCGAGC   |                              |                              |                              |     | 478 |
| <i>Sinocyclocheilus anshuiensis</i>  | GGACAGCATCTACTCA | ACTGCAAGGT   | GTGTCTCT             | .....           | TCA                            | .....                        | GAGGAATGCTGGTCTTTGGAGCCTGAGC |                              |     | 469 |
| <i>Xenopus tropicalis</i>            | GGACAGCATCTATTCA | ACAGCCAAAGT  | TTGCCCTCCCAATGCAACT  | .....           | GCGAAATGCTGGTCTTTGGAACCCGAAA   |                              |                              |                              |     | 478 |
| <i>Lipotes vexillifer</i>            | GTCCAGGATTTACTCC | ACGGCCAAAGT  | CTGCTTCCCCAACAAGACT  | .....           | GCCACCTGCTGGTCCCTTGACCCAGAGC   |                              |                              |                              |     | 538 |
| <i>Orcinus orca</i>                  | GTCCAGGATTTACTCC | ACGGCCAAAGT  | CTGCTTCCCCAACAAGACT  | .....           | GCCACCTGCTGGTCCCTTGACCCAGAGC   |                              |                              |                              |     | 523 |
| <i>Homo sapiens</i>                  | GAGCAGGATCTACTCC | ACGGCCAAAGT  | CTGCTTCCCCAACAAGACT  | .....           | GCCACCTGCTGGTCCCTTGACCCAGATC   |                              |                              |                              |     | 514 |

| conservation                         | 500 | 510 | 520 | 530 | 540 | 550 | 560 | 570 |     |
|--------------------------------------|-----|-----|-----|-----|-----|-----|-----|-----|-----|
| <i>Callorhinchus milii</i>           | T   | C   | G   | T   | G   | C   | A   | A   | 573 |
| <i>Alligator mississippiensis</i>    | T   | A   | T   | C   | T   | G   | A   | C   | 578 |
| <i>Anolis carolinensis</i>           | T   | T   | A   | C   | A   | T   | T   | C   | 630 |
| <i>Astyanax mexicanus</i>            | T   | G   | A   | A   | G   | G   | A   | G   | 555 |
| <i>Boleophthalmus pectinirostris</i> | T   | G   | A   | C   | A   | A   | A   | T   | 576 |
| <i>Cynoglossus semilaevis</i>        | T   | C   | A   | C   | A   | A   | T   | C   | 579 |
| <i>Danio rerio</i>                   | T   | C   | C   | A   | A   | A   | T   | C   | 678 |
| <i>Esox lucius</i>                   | T   | G   | A   | C   | A   | A   | T   | C   | 567 |
| <i>Fundulus heteroclitus</i>         | T   | C   | A   | C   | A   | A   | T   | C   | 585 |
| <i>Gekko japonicus</i>               | T   | A   | A   | C   | A   | A   | T   | C   | 570 |
| <i>Haplochromis burtoni</i>          | T   | C   | A   | C   | A   | A   | T   | C   | 576 |
| <i>Hippocampus comes</i>             | T   | C   | A   | C   | A   | A   | T   | C   | 561 |
| <i>Ictalurus punctatus</i>           | T   | G   | A   | C   | A   | A   | T   | C   | 564 |
| <i>Larimichthys crocea</i>           | T   | C   | A   | C   | A   | A   | T   | C   | 570 |
| <i>Lates calcarifer</i>              | T   | C   | A   | C   | A   | A   | T   | C   | 573 |
| <i>Latimeria chalumnae</i>           | T   | G   | G   | T   | A   | A   | C   | T   | 552 |
| <i>Lepisosteus oculatus</i>          | T   | C   | G   | T   | A   | A   | C   | T   | 558 |
| <i>Macaca fascicularis</i>           | T   | C   | A   | C   | A   | A   | T   | C   | 597 |
| <i>Manacus vitellinus</i>            | T   | C   | T   | C   | G   | G   | A   | C   | 549 |
| <i>Mus musculus</i>                  | T   | C   | A   | C   | A   | A   | T   | C   | 609 |
| <i>Neolamprologus brichardi</i>      | T   | C   | A   | C   | A   | A   | T   | C   | 576 |
| <i>Oncorhynchus mykiss</i>           | T   | G   | A   | C   | A   | A   | T   | C   | 567 |
| <i>Oreochromis niloticus</i>         | T   | C   | A   | C   | A   | A   | T   | C   | 576 |
| <i>Poecilia formosa</i>              | T   | C   | A   | C   | A   | A   | T   | C   | 582 |
| <i>Poecilia latipinna</i>            | T   | C   | A   | C   | A   | A   | T   | C   | 582 |
| <i>Pseudopodoces humilis</i>         | T   | C   | T   | C   | G   | G   | A   | C   | 549 |
| <i>Pundamilia nyererei</i>           | T   | C   | A   | C   | A   | A   | T   | C   | 576 |
| <i>Pygocentrus nattereri</i>         | T   | G   | A   | A   | G   | A   | G   | A   | 549 |
| <i>Python bivittatus</i>             | T   | T   | A   | C   | A   | A   | T   | C   | 561 |
| <i>Rattus norvegicus</i>             | T   | C   | A   | C   | A   | A   | T   | C   | 612 |
| <i>Scleropages formosus</i>          | T   | G   | A   | C   | A   | A   | T   | C   | 558 |
| <i>Sinocyclocheilus anshuiensis</i>  | T   | C   | A   | C   | A   | A   | T   | C   | 549 |
| <i>Xenopus tropicalis</i>            | T   | A   | A   | C   | A   | A   | T   | C   | 558 |
| <i>Lipotes vexillifer</i>            | T   | C   | A   | C   | A   | A   | T   | C   | 618 |
| <i>Orcinus orca</i>                  | T   | C   | A   | C   | A   | A   | T   | C   | 603 |
| <i>Homo sapiens</i>                  | T   | C   | A   | C   | A   | A   | T   | C   | 594 |

| conservation                         | 580 | 590 | 600 | 610 | 620 | 630 | 640 | 650 |     |
|--------------------------------------|-----|-----|-----|-----|-----|-----|-----|-----|-----|
| <i>Callorhinchus milii</i>           | C   | C   | T   | G   | A   | G   | A   | G   | 653 |
| <i>Alligator mississippiensis</i>    | C   | C   | C   | T   | G   | A   | G   | A   | 638 |
| <i>Anolis carolinensis</i>           | C   | C   | C   | T   | G   | A   | G   | A   | 710 |
| <i>Astyanax mexicanus</i>            | C   | C   | A   | C   | T   | C   | A   | A   | 635 |
| <i>Boleophthalmus pectinirostris</i> | C   | C   | C   | T   | C   | A   | A   | A   | 656 |
| <i>Cynoglossus semilaevis</i>        | C   | C   | T   | C   | T   | G   | A   | G   | 659 |
| <i>Danio rerio</i>                   | C   | C   | T   | C   | T   | A   | A   | T   | 758 |
| <i>Esox lucius</i>                   | C   | C   | A   | C   | T   | A   | A   | T   | 647 |
| <i>Fundulus heteroclitus</i>         | C   | C   | C   | T   | A   | A   | G   | A   | 665 |
| <i>Gekko japonicus</i>               | C   | C   | T   | C   | T   | G   | A   | G   | 650 |
| <i>Haplochromis burtoni</i>          | C   | C   | A   | C   | T   | C   | A   | A   | 656 |
| <i>Hippocampus comes</i>             | C   | C   | C   | T   | C   | A   | A   | T   | 641 |
| <i>Ictalurus punctatus</i>           | C   | C   | A   | C   | T   | C   | A   | A   | 644 |
| <i>Larimichthys crocea</i>           | C   | C   | T   | C   | T   | A   | A   | T   | 650 |
| <i>Lates calcarifer</i>              | C   | C   | T   | C   | T   | A   | A   | T   | 653 |
| <i>Latimeria chalumnae</i>           | C   | C   | A   | C   | T   | G   | A   | G   | 632 |
| <i>Lepisosteus oculatus</i>          | C   | C   | G   | T   | G   | C   | G   | A   | 638 |
| <i>Macaca fascicularis</i>           | C   | C   | G   | T   | G   | A   | G   | A   | 677 |
| <i>Manacus vitellinus</i>            | C   | C   | G   | T   | G   | A   | G   | A   | 629 |
| <i>Mus musculus</i>                  | C   | C   | A   | C   | T   | G   | A   | G   | 689 |
| <i>Neolamprologus brichardi</i>      | C   | C   | A   | C   | T   | C   | A   | A   | 656 |
| <i>Oncorhynchus mykiss</i>           | C   | C   | A   | C   | T   | C   | A   | A   | 647 |
| <i>Oreochromis niloticus</i>         | C   | C   | A   | C   | T   | C   | A   | A   | 656 |
| <i>Poecilia formosa</i>              | C   | C   | T   | C   | T   | A   | A   | T   | 662 |
| <i>Poecilia latipinna</i>            | C   | C   | T   | C   | T   | A   | A   | T   | 662 |
| <i>Pseudopodoces humilis</i>         | C   | C   | G   | T   | G   | C   | G   | A   | 629 |
| <i>Pundamilia nyererei</i>           | C   | C   | A   | C   | T   | C   | A   | A   | 656 |
| <i>Pygocentrus nattereri</i>         | C   | C   | A   | C   | T   | C   | A   | A   | 629 |
| <i>Python bivittatus</i>             | C   | C   | T   | C   | T   | G   | A   | G   | 641 |
| <i>Rattus norvegicus</i>             | C   | C   | A   | C   | T   | G   | A   | G   | 692 |
| <i>Scleropages formosus</i>          | C   | C   | T   | C   | T   | G   | A   | G   | 638 |
| <i>Sinocyclocheilus anshuiensis</i>  | C   | C   | A   | C   | T   | C   | A   | A   | 629 |
| <i>Xenopus tropicalis</i>            | C   | C   | A   | C   | T   | A   | A   | T   | 638 |
| <i>Lipotes vexillifer</i>            | C   | C   | G   | T   | G   | A   | G   | A   | 698 |
| <i>Orcinus orca</i>                  | C   | C   | G   | T   | G   | A   | G   | A   | 683 |
| <i>Homo sapiens</i>                  | C   | C   | G   | T   | G   | A   | G   | A   | 674 |





| conservation                         | 820                                                                                 | 830 | 840 | 850 | 860 | 870 | 880 | 890 |  |
|--------------------------------------|-------------------------------------------------------------------------------------|-----|-----|-----|-----|-----|-----|-----|--|
| <i>Callorhinchus milii</i>           | GCACATCTCCTGGGTAATATGTGGGCACAGCAGTGGAAATAATATCTATGAAATGATGATCCCATTCCAGACAAAGACAA    | 893 |     |     |     |     |     |     |  |
| <i>Alligator mississippiensis</i>    | GCTCATTTCGCTGGGCAACATGTGGGCTCAGCAGTGGAAACAACATCTATGACATGATGATCCCCTACCCAAACAAGCCCAA  | 878 |     |     |     |     |     |     |  |
| <i>Anolis carolinensis</i>           | GCTCATTTCGCTGGGTAACATGTGGGCCAGCAAATGGAAATAATATTTATGATATGATGATCCCCTTCCCAAATAAACCTAA  | 950 |     |     |     |     |     |     |  |
| <i>Astyanax mexicanus</i>            | GCCCATCTTCTCGGTAATATGTGGTCACAAACC                                                   | 875 |     |     |     |     |     |     |  |
| <i>Boleophthalmus pectinirostris</i> | GCTCACCTCCTCGGAAACATGTGGTCTCAGACGTGGAAACAACATCTATGGGATGATGATACCTTTTCCAAACAAACCTAA   | 896 |     |     |     |     |     |     |  |
| <i>Cynoglossus semilaevis</i>        | GCTCACCTGTTAGGAAACATGTGGGCCAGACCTGGAAACAACATTTATGTTTGATGATTCCATTTCCAGAGAAACCCAA     | 899 |     |     |     |     |     |     |  |
| <i>Danio rerio</i>                   | GCTCATCTATTGGGCAACATGTGGTCACAAACATGGAAACAACATCTACAATATGATGATCCCTTCCCTAACAGACCCAA    | 998 |     |     |     |     |     |     |  |
| <i>Esox lucius</i>                   | GCTCACCTTCTAGGAAACATGTGGGCGCAAACCTGGAAACAACATCTATGACATGATGATCCCTTCCCGGAAACCTAA      | 887 |     |     |     |     |     |     |  |
| <i>Fundulus heteroclitus</i>         | GCTCACCTGTTGGGAAATATGTGGGCCAGTCGTGGGATAACATTTATAGTATGATGATCCCATTTCCTGACAAACCCAA     | 905 |     |     |     |     |     |     |  |
| <i>Gekko japonicus</i>               | GCTCACTTACTGGGTAACATGTGGGCCAGCAGTGGAAACAACATTTACGATATGATGATTCCCTTCCCAGACAAAGCCCAA   | 890 |     |     |     |     |     |     |  |
| <i>Haplochromis burtoni</i>          | GCTCACTTGCTAGGAAATATGTGGGCCAGACCTGGAAACAACATTTATGATATGATGATCCCATTTCCTGACAAACCTAA    | 896 |     |     |     |     |     |     |  |
| <i>Hippocampus comes</i>             | GCTCATCTGCTGGGAAACATGTGGGCCAGACCTGGAAACAACATCTACGGCTTGATGATACCGTTTCCCTGACAAACCCAA   | 881 |     |     |     |     |     |     |  |
| <i>Ictalurus punctatus</i>           | GCCCATCTGCTTTGGAAACATGTGGGCAACAAAGCTGGAAACAACATCTATGACTTGATGATCCCTTCCCTAACAGCCCAA   | 884 |     |     |     |     |     |     |  |
| <i>Larimichthys crocea</i>           | GCTCACCTGCTTGGAAATATGTGGGCCAGACCTGGAAACAATATTTATGGTCTAATGATCCCATTTCCTGAGAAACCCAA    | 890 |     |     |     |     |     |     |  |
| <i>Lates calcarifer</i>              | GCCCACCTGCTAGGAAATATGTGGGCCAGACCTGGAAATAATATTTATGGTATGATGATCCCATTTCCTGACAAACCTAA    | 893 |     |     |     |     |     |     |  |
| <i>Latimeria chalumnae</i>           | GCCCACCTATTAGGTAAACATGTGGGCTCAGCAAATGGAAATAACATCTATGACATGATGATTCCATTCCACAAAAAACAAA  | 872 |     |     |     |     |     |     |  |
| <i>Lepisosteus oculatus</i>          | GCACACTTACTTTGGAAACATGTGGGCTCAACAGTGGAAACAACATCTATGATATGATGGTACCCTTTCTCTACAAAGCCCAA | 878 |     |     |     |     |     |     |  |
| <i>Macaca fascicularis</i>           | GCTCATCTGCTGGGAGACATGTGGGCCAGAGCTGGGAAAACATCTACGACATGGTGGTGCCTTTCCCGACAAAGCCCAA     | 917 |     |     |     |     |     |     |  |
| <i>Manacus vitellinus</i>            | GCTCACCTCCTGGGGAACATGTGGGCTCAGCAGTGGAAACAACATCTACGACCTGATGGTCCCTTACCCTGAGAAAGCCCAA  | 869 |     |     |     |     |     |     |  |
| <i>Mus musculus</i>                  | GCCCATTTCGCTGGGAGACATGTGGGCCAGAGCTGGGAGAACATCTACGACATGGTAGTGCTTTCCCGACAAACCCAA      | 929 |     |     |     |     |     |     |  |
| <i>Neolamprologus brichardi</i>      | GCTCACTTGCTAGGAAATATGTGGGCCAGACCTGGAAACAACATTTATGATATGATGATCCCATTTCCTGACAAACCTAA    | 896 |     |     |     |     |     |     |  |
| <i>Oncorhynchus mykiss</i>           | GCTCACCTGCTGGGAAACATGTGGTCCGAAACCTGGAAACAACATCTATGGCATGATGATCCCTTCCCGGCAAAACCCAA    | 887 |     |     |     |     |     |     |  |
| <i>Oreochromis niloticus</i>         | GCTCACTTGCTAGGAAATATGTGGGCCAGACCTGGAAACAACATTTATGATATGATGATCCCATTTCTCTGACAAACCTAA   | 896 |     |     |     |     |     |     |  |
| <i>Poecilia formosa</i>              | GCACACCTGTTGGGAAATATGTGGGCCAGACATGGAAATAACATTTATGATATGATGATCCCATTTCCTGACAAACCCAA    | 902 |     |     |     |     |     |     |  |
| <i>Poecilia latipinna</i>            | GCACACCTGTTGGGAAATATGTGGGCCAGACATGGAAATAACATTTATGATATGATGATCCCATTTCCTGACAAACCCAA    | 902 |     |     |     |     |     |     |  |
| <i>Pseudopodoces humilis</i>         | GCTCACCTCCTGGGGAATATGTGGGCTCAGCAGTGGAAACAACATCTATGACCTGATGATCCCTTACCCTGAGAAAGCCCAA  | 869 |     |     |     |     |     |     |  |
| <i>Pundamilia nyererei</i>           | GCTCACTTGCTAGGAAATATGTGGGCCAGACCTGGAAACAACATTTATGATATGATGATCCCATTTCCTGACAAACCTAA    | 896 |     |     |     |     |     |     |  |
| <i>Pygocentrus nattereri</i>         | GCCCATCTTCTTTGGAAACATGTGGTCCGAAACCTGGAAATAACATCTACGACATGATGATTCCGTTCCCTGATAAGCCAAA  | 869 |     |     |     |     |     |     |  |
| <i>Python bivittatus</i>             | GCTCACTTATTGGGTAACATGTGGGCCAACAAATGGAAACAACATTTACGACATGATGGTGCCTTTTGCAATAAGCCAAA    | 881 |     |     |     |     |     |     |  |
| <i>Rattus norvegicus</i>             | GCTCATCTGCTGGGAGACATGTGGGCGCAGAGCTGGGAGAACATTTACGACATGGTAGTGCTTTCCCGGACAAACCCAA     | 932 |     |     |     |     |     |     |  |
| <i>Scleropages formosus</i>          | GCACATCTCTTAGGAAACATGTGGGCACAAACTGGAAACAACATCTATGACATGATGATCCCTTCCCGAGGAAGCCCAA     | 878 |     |     |     |     |     |     |  |
| <i>Sinocyclocheilus anshuiensis</i>  | GCCCACCTCTTGGGCAACATGTGGTCACAAACGTGGAAACAACATCTACAACATGATGATTCCCTTTCCTGACAAAGCCCAA  | 869 |     |     |     |     |     |     |  |
| <i>Xenopus tropicalis</i>            | GCTCATCTGTTTGGTAAACATGTGGTCCAGCAGTGGAAATAATATCTACGACATGATGATTCCCTTCCCGACAAAGCCCAA   | 878 |     |     |     |     |     |     |  |
| <i>Lipotes vexillifer</i>            | GCTCACCTGCTGGGGGACATGTGGGCCAGAGCTGGGACAAAATCTACGACATGGTGGTGCCTTTCTCTGCCAAGCCCAA     | 938 |     |     |     |     |     |     |  |
| <i>Orcinus orca</i>                  | GCTCACCTGCTGGGGGACATGTGGGCCAGAGCTGGGACAAAATCTACGACATGGTGGTGCCTTTCTCTGACAAAGCCCAA    | 923 |     |     |     |     |     |     |  |
| <i>Homo sapiens</i>                  | GCTCATCTGCTGGGAGACATGTGGGCCAGAGCTGGGAAAACATCTACGACATGGTGGTGCCTTTCCCGACAAAGCCCAA     | 914 |     |     |     |     |     |     |  |

| conservation                         | 900                                                        | 910                              | 920  | 930 | 940 | 950 | 960 | 970 |  |
|--------------------------------------|------------------------------------------------------------|----------------------------------|------|-----|-----|-----|-----|-----|--|
| <i>Callorhinchus milii</i>           | CATTGATGTTACTGATGCAATGTTTCAGCAAAAATTGGAAACGCCACCCGTATGTT   | CAGAGTTGCTGAGGATTTCTTCAAAAT      | 973  |     |     |     |     |     |  |
| <i>Alligator mississippiensis</i>    | TCTGGATGTGCACAAATGCCATGAATCAGAAAAAATCTGGAAACGCCACGCACATGTT | CCGGGTCTCGGAGGAGTTCTTCACTT       | 958  |     |     |     |     |     |  |
| <i>Anolis carolinensis</i>           | TGTGGACGTGCACCAACACCATGCAGCAACAAAATTGGAAACGTAACACGCATGTT   | CCGGGTGTCTGGAGGAATTTCTTCACTT     | 1030 |     |     |     |     |     |  |
| <i>Astyanax mexicanus</i>            | TGTGGATGTGACTAATGCCATGTTTGAGAAAGAACTACAACGCCACACATATGTT    | CCGGGTAGCTGAAGAGTTCTTCAAT        | 955  |     |     |     |     |     |  |
| <i>Boleophthalmus pectinirostris</i> | CCTAGATGTGACAGCTGAAATGGAGAGACAAGGCTACAATGCCACACACATGTT     | CAGAGTAGCAGAGGAGTTCTTCACTT       | 976  |     |     |     |     |     |  |
| <i>Cynoglossus semilaevis</i>        | CCTGGATGTGACTGAGGAGATGGTCAACCAGGGTTACAATGCTACACACATGTT     | CCGTGTGGCTGAGGAGTTCTTCACTT       | 979  |     |     |     |     |     |  |
| <i>Danio rerio</i>                   | TGTAGATGTGACCAATACCATGATCGCTAAAGGTTATAATGCCACGCACATGTT     | CCGGGTAGCAGAGGAGTTTCTTCACTT      | 1078 |     |     |     |     |     |  |
| <i>Esox lucius</i>                   | TGTGGATGTGACCAAGAAAATGGAGGCCATAAATGGAAACGCCACTCACATGTT     | CCGTGTGGCTGAGGAGTTCTTCACAT       | 967  |     |     |     |     |     |  |
| <i>Fundulus heteroclitus</i>         | CCTGGATGTGACCGATGAGATGGTCAGACAAGGTTACAATGCCACACACATGTTT    | CGTTTATCTGAGGAGTTCTTCACTT        | 985  |     |     |     |     |     |  |
| <i>Gekko japonicus</i>               | TCTCGATGTGCACCAATACAATGAAACAAAAAAATTTGGAAATGCCACACACATGTT  | CCGGGTGGCAGAGGAGTTCTTCACTT       | 970  |     |     |     |     |     |  |
| <i>Haplochromis burtoni</i>          | CATTGATGTGACTGATGAAATGTCAGACAAGGCTATAACGCCACACACATGTTT     | CGTGTGGCCGAGGAGTTCTTCACTT        | 976  |     |     |     |     |     |  |
| <i>Hippocampus comes</i>             | CATGGACGTGACTGAAGAAATGCTCAACCAGGGCTACAACGCCACGCCCATGTTT    | CCGGTTGCGGAGGAGTTCTTCAAT         | 961  |     |     |     |     |     |  |
| <i>Ictalurus punctatus</i>           | TGTGGACGTGACTAACACCATGGTTGCCCAAGGCTACAATGCCACCCATATGTTT    | CCGGTGGCTGAAGAGTTCTTCACTT        | 964  |     |     |     |     |     |  |
| <i>Larimichthys crocea</i>           | CTTGGATGTGACTAATGAAATGATCAACCACGCTATAATGCCTGCACATGTT       | CCGTGTGTCTGAGGAGTTCTTCACTT       | 970  |     |     |     |     |     |  |
| <i>Lates calcarifer</i>              | CATGGATGTGACTGATGAAATGTCAGACAAGGCTACAATGCCACACACATGTTT     | CGTGTGGCCGAGGAGTTCTTCACTT        | 973  |     |     |     |     |     |  |
| <i>Latimeria chalumnae</i>           | CGTAGATGTGCACGGATGCTATGATTAAGAAAGAACTGGAATGCTACCCATATGTT   | CAAAGTTTCTGAAGAGTTCTTCACTT       | 952  |     |     |     |     |     |  |
| <i>Lepisosteus oculatus</i>          | CCTTGACGTGACACAAACTATGGTGAATCTGAAGTGGAAATGCCACCCACATGTT    | CCGAGTCTCCGAAGAGTTCTTCACTT       | 958  |     |     |     |     |     |  |
| <i>Macaca fascicularis</i>           | CCTCGACGTGACAGTACTATGCTGCAGCAGGGCTGGAATGCCACGCACATGTTT     | CCGGTGGCAGAGGAGTTCTTCACTT        | 997  |     |     |     |     |     |  |
| <i>Manacus vitellinus</i>            | CCTTGATGTGCACGATGCCATGGTGCAGCAGGGCTGGAATGCCACCCACATGTT     | CCGGGTCTCAGAGGAGTTCTTCACTT       | 949  |     |     |     |     |     |  |
| <i>Mus musculus</i>                  | CCTCGATGTCCACAGTACAATGGTACAGAAAGGGCTGGAACGCCACACACATGTT    | CCGGGTATCAGAGGAATTTCTTCACTT      | 1009 |     |     |     |     |     |  |
| <i>Neolamprologus brichardi</i>      | CATTGATGTGACTGATGAAATGGGCAGACAAGGCTATAACGCCACACACATGTTT    | CGTGTGGCCGAGGAGTTCTTCACTT        | 976  |     |     |     |     |     |  |
| <i>Oncorhynchus mykiss</i>           | TGTGGACGTGACCGATGAAATGGTGGCCAAAAAATGGAAATGTTACTCACATGTT    | CCGGGTGGCTGAGGAGTTCTTCACTT       | 967  |     |     |     |     |     |  |
| <i>Oreochromis niloticus</i>         | CATTGATGTGACTGATGAAATGGTGCAGACAAGGCTATAACGCCACACACATGTTT   | CGTGTGGCCGAGGAGTTCTTCACTT        | 976  |     |     |     |     |     |  |
| <i>Poecilia formosa</i>              | CCTGGATGTGACAGTGAGATGGTCAATCAGGGCTACAATGCTACACACATGTTT     | CCGTGTAGCTGAGGAGTTCTTCACTT       | 982  |     |     |     |     |     |  |
| <i>Poecilia latipinna</i>            | CCTGGATGTGACAAGCGAGATGGTCAATCAGGGCTACAATGCTACACACATGTTT    | CCGTGTGGCTGAGGAGTTCTTCACTT       | 982  |     |     |     |     |     |  |
| <i>Pseudopodoces humilis</i>         | CCTTGATGTGCACGAGCAGCATGGTGCAGCAGGGCTGGAATGCCACCCACATGTT    | CCGAGTCTCGGAGGAGTTCTTCACTT       | 949  |     |     |     |     |     |  |
| <i>Pundamilia nyererei</i>           | CATTGATGTGACTGATGAAATGGTGCAGACAAGGCTATAACGCCACACACATGTTT   | CGTGTGGCCGAGGAGTTCTTCACTT        | 976  |     |     |     |     |     |  |
| <i>Pygocentrus nattereri</i>         | TGTGGATGTGACTAGCAACATGTTGCACAAGGCTACAATGCCACCCACATGTTT     | CCGTGTGGCTGAGGAGTTCTTCACTT       | 949  |     |     |     |     |     |  |
| <i>Python bivittatus</i>             | TCTAGATGTTACCAACGTCATGAAGCAGAAAAAATGGAAACGTAACAGT          | CATGTTCCGGGTGGCAGAGGAGTTCTTCACTT | 961  |     |     |     |     |     |  |
| <i>Rattus norvegicus</i>             | CCTCGATGTCCACGATACAATGGTACAGAAAGGGCTGGAATGCCACGCACATGTT    | CCGGTTCGACAGGAATTTCTTCACTT       | 1012 |     |     |     |     |     |  |
| <i>Scleropages formosus</i>          | TGTTGATGTGCACGGATGCTATGATTGCACAAGACTGGACCACCACAAAAATGTT    | CAGAGTCTCAGATGAGTTCTTCACTT       | 958  |     |     |     |     |     |  |
| <i>Sinocyclocheilus anshuiensis</i>  | TGTAGATGTGACGGACACCATGGTTGCTAAAGGTTATAATGCCACTCACATGTT     | CCGGGTGGCCGAGGAGTTCTTCACTT       | 949  |     |     |     |     |     |  |
| <i>Xenopus tropicalis</i>            | TATAGATGTCACATAATACAATGAGGGAAAAAGGATGGAATGCTACCCATATGTT    | CAGAGTTTCTCAGAGGAGTTCTTCACTT     | 958  |     |     |     |     |     |  |
| <i>Lipotes vexillifer</i>            | TCTTGACGTTACAGTACTATGGTGCAGAAAGGATGGAACGCTACACACATGTT      | CCGGTGGCAGAGGAGTTCTTCACTT        | 1018 |     |     |     |     |     |  |
| <i>Orcinus orca</i>                  | TCTTGACGTTACAGTACTATGGTGCAGAAAGGATGGAACGCTACACACATGTT      | CCGGTGGCAGAGGAGTTCTTCACTT        | 1003 |     |     |     |     |     |  |
| <i>Homo sapiens</i>                  | CCTCGATGTCCACAGTACTATGCTGCAGCAGGGCTGGAACGCCACGCACATGTT     | CCGGTGGCAGAGGAGTTCTTCACTT        | 994  |     |     |     |     |     |  |







|              | 1140                                                                                                                                                                                                                                                                                                                                                                                                                                                                                                                                                                                                                                                                                                                                                                                                                                                                                                                                                                                                                                                                                                                                                                                                                                                                                                                                                                                                                                                                                                                                                                                                                                                                                                                                                                                                                                                                                                                                                                                                                                                                                                                                                                                                                                                                                                                                                                                                                                                                                                                                                                                                                                                                                                                                                                                                                                                                                                                                                                                                                                                                                                                                                                                                                                                                                                                                                                                                                                                                                                                                                                                                                                                                                                                                                                                                                                                                                                                                                                                                                                                                                                                                                                                                                                                                                                                                                                                                                                                                                                                                                                                                                                                                                                                                                                                                                                                                                                                                                                                                                                                                                                                                                                                                                                                                                                                                                                                                                                                                                                                                                                                                                                                                                                                                                                                                                                                                                                                                                                                                                                                                                                                                                                                                                                                                                                                                                                                                                                                                                                                                                                                                                                                                                                                                                                                                                                                                                                                                                                                                                                                                                                                                                                                                                                                                                                                                                                                                                                                                                                                                                                                                                                                                                                                                                                                                                                                                                                                                                                                                                                                                                                                                                                                                                                                                                                                                                                                                                                                                                                                                                                                                                                                                                                                                                                                                                                                                                                                                                                                                                                                                                                                                                                                                                                                                                                                                                                                                                                                                                                                                                                                                                                                                                                                                                                                                                                                                                                                                                                                                                                                                                                                                                                                                                                                                                                                                                                                                                                                                                                                                                                                                                                                                                                                                                                                                                                                                                                                                                                                                                                                                                                                                                                                                                                                                                                                                                                                                                                                                                                                                                                                                                                                                                                                                                                                                                                                                                                                                                                                                                                                                                                                                                                                                                                                                                                                                                                                                                                                                                                                                                                                                                                                                                                                                                                                                                                                                                                                                                                                                                                                                                                                                                                                                                                                                                                                                                                                                                                                                                                                                                                                                                                                                                                                                                                                                                                                                                                                                                                                                                                                                                                                                                                                                                                                                                                                                                                                                                                                                                                                                                                                                                                                                                                                                                                                                                                                                                                                                                                                                                                                   | 1150 | 1160 | 1170 | 1180 | 1190 | 1200 | 1210 |  |
|--------------|--------------------------------------------------------------------------------------------------------------------------------------------------------------------------------------------------------------------------------------------------------------------------------------------------------------------------------------------------------------------------------------------------------------------------------------------------------------------------------------------------------------------------------------------------------------------------------------------------------------------------------------------------------------------------------------------------------------------------------------------------------------------------------------------------------------------------------------------------------------------------------------------------------------------------------------------------------------------------------------------------------------------------------------------------------------------------------------------------------------------------------------------------------------------------------------------------------------------------------------------------------------------------------------------------------------------------------------------------------------------------------------------------------------------------------------------------------------------------------------------------------------------------------------------------------------------------------------------------------------------------------------------------------------------------------------------------------------------------------------------------------------------------------------------------------------------------------------------------------------------------------------------------------------------------------------------------------------------------------------------------------------------------------------------------------------------------------------------------------------------------------------------------------------------------------------------------------------------------------------------------------------------------------------------------------------------------------------------------------------------------------------------------------------------------------------------------------------------------------------------------------------------------------------------------------------------------------------------------------------------------------------------------------------------------------------------------------------------------------------------------------------------------------------------------------------------------------------------------------------------------------------------------------------------------------------------------------------------------------------------------------------------------------------------------------------------------------------------------------------------------------------------------------------------------------------------------------------------------------------------------------------------------------------------------------------------------------------------------------------------------------------------------------------------------------------------------------------------------------------------------------------------------------------------------------------------------------------------------------------------------------------------------------------------------------------------------------------------------------------------------------------------------------------------------------------------------------------------------------------------------------------------------------------------------------------------------------------------------------------------------------------------------------------------------------------------------------------------------------------------------------------------------------------------------------------------------------------------------------------------------------------------------------------------------------------------------------------------------------------------------------------------------------------------------------------------------------------------------------------------------------------------------------------------------------------------------------------------------------------------------------------------------------------------------------------------------------------------------------------------------------------------------------------------------------------------------------------------------------------------------------------------------------------------------------------------------------------------------------------------------------------------------------------------------------------------------------------------------------------------------------------------------------------------------------------------------------------------------------------------------------------------------------------------------------------------------------------------------------------------------------------------------------------------------------------------------------------------------------------------------------------------------------------------------------------------------------------------------------------------------------------------------------------------------------------------------------------------------------------------------------------------------------------------------------------------------------------------------------------------------------------------------------------------------------------------------------------------------------------------------------------------------------------------------------------------------------------------------------------------------------------------------------------------------------------------------------------------------------------------------------------------------------------------------------------------------------------------------------------------------------------------------------------------------------------------------------------------------------------------------------------------------------------------------------------------------------------------------------------------------------------------------------------------------------------------------------------------------------------------------------------------------------------------------------------------------------------------------------------------------------------------------------------------------------------------------------------------------------------------------------------------------------------------------------------------------------------------------------------------------------------------------------------------------------------------------------------------------------------------------------------------------------------------------------------------------------------------------------------------------------------------------------------------------------------------------------------------------------------------------------------------------------------------------------------------------------------------------------------------------------------------------------------------------------------------------------------------------------------------------------------------------------------------------------------------------------------------------------------------------------------------------------------------------------------------------------------------------------------------------------------------------------------------------------------------------------------------------------------------------------------------------------------------------------------------------------------------------------------------------------------------------------------------------------------------------------------------------------------------------------------------------------------------------------------------------------------------------------------------------------------------------------------------------------------------------------------------------------------------------------------------------------------------------------------------------------------------------------------------------------------------------------------------------------------------------------------------------------------------------------------------------------------------------------------------------------------------------------------------------------------------------------------------------------------------------------------------------------------------------------------------------------------------------------------------------------------------------------------------------------------------------------------------------------------------------------------------------------------------------------------------------------------------------------------------------------------------------------------------------------------------------------------------------------------------------------------------------------------------------------------------------------------------------------------------------------------------------------------------------------------------------------------------------------------------------------------------------------------------------------------------------------------------------------------------------------------------------------------------------------------------------------------------------------------------------------------------------------------------------------------------------------------------------------------------------------------------------------------------------------------------------------------------------------------------------------------------------------------------------------------------------------------------------------------------------------------------------------------------------------------------------------------------------------------------------------------------------------------------------------------------------------------------------------------------------------------------------------------------------------------------------------------------------------------------------------------------------------------------------------------------------------------------------------------------------------------------------------------------------------------------------------------------------------------------------------------------------------------------------------------------------------------------------------------------------------------------------------------------------------------------------------------------------------------------------------------------------------------------------------------------------------------------------------------------------------------------------------------------------------------------------------------------------------------------------------------------------------------------------------------------------------------------------------------------------------------------------------------------------------------------------------------------------------------------------------------------------------------------------------------------------------------------------------------------------------------------------------------------------------------------------------------------------------------------------------------------------------------------------------------------------------------------------------------------------------------------------------------------------------------------------------------------------------------------------------------------------------------------------------------------------------------------------------------------------------------------------------------------------------------------------------------------------------------------------------------------------------------------------------------------------------------------------------------------------------------------------------------------------------------------------------------------------------------------------------------------------------------------------------------------------------------------------------------------------------------------------------------------------------------------------------------------------------------------------------------------------------------------------------------------------------------------------------------------------------------------------------------------------------------------------------------------------------------------------------------------------------------------------------------------------------------------------------------------------------------------------------------------------------------------------------------------------------------------------------------------------------------------------------------------------------------------------------------------------------------------------------------------------------------------------------------------------------------------------------------------------------------------------------------------------------------------------------------------------------------------------------------------------------------------------------------------------------------------------------------------------------------------------------------------------------------------------------------------------------------------------------------------------------------------------------------------------------------------------------------------------------------------------------------------------------------------------------------------------------------------------------------------------------------------------------------------------------------------------------------------------------------------------------------------------------------------------------------------------------------------------------------------------------------------------------------------------------------------------------------------------------------------------------------------------------------------------------------------------------------------------------------------------------------------------------------------------------|------|------|------|------|------|------|------|--|
| conservation | <div><div></div><div></div><div></div><div></div><div></div><div></div><div></div><div></div><div></div><div></div><div></div><div></div><div></div><div></div><div></div><div></div><div></div><div></div><div></div><div></div><div></div><div></div><div></div><div></div><div></div><div></div><div></div><div></div><div></div><div></div><div></div><div></div><div></div><div></div><div></div><div></div><div></div><div></div><div></div><div></div><div></div><div></div><div></div><div></div><div></div><div></div><div></div><div></div><div></div><div></div><div></div><div></div><div></div><div></div><div></div><div></div><div></div><div></div><div></div><div></div><div></div><div></div><div></div><div></div><div></div><div></div><div></div><div></div><div></div><div></div><div></div><div></div><div></div><div></div><div></div><div></div><div></div><div></div><div></div><div></div><div></div><div></div><div></div><div></div><div></div><div></div><div></div><div></div><div></div><div></div><div></div><div></div><div></div><div></div><div></div><div></div><div></div><div></div><div></div><div></div><div></div><div></div><div></div><div></div><div></div><div></div><div></div><div></div><div></div><div></div><div></div><div></div><div></div><div></div><div></div><div></div><div></div><div></div><div></div><div></div><div></div><div></div><div></div><div></div><div></div><div></div><div></div><div></div><div></div><div></div><div></div><div></div><div></div><div></div><div></div><div></div><div></div><div></div><div></div><div></div><div></div><div></div><div></div><div></div><div></div><div></div><div></div><div></div><div></div><div></div><div></div><div></div><div></div><div></div><div></div><div></div><div></div><div></div><div></div><div></div><div></div><div></div><div></div><div></div><div></div><div></div><div></div><div></div><div></div><div></div><div></div><div></div><div></div><div></div><div></div><div></div><div></div><div></div><div></div><div></div><div></div><div></div><div></div><div></div><div></div><div></div><div></div><div></div><div></div><div></div><div></div><div></div><div></div><div></div><div></div><div></div><div></div><div></div><div></div><div></div><div></div><div></div><div></div><div></div><div></div><div></div><div></div><div></div><div></div><div></div><div></div><div></div><div></div><div></div><div></div><div></div><div></div><div></div><div></div><div></div><div></div><div></div><div></div><div></div><div></div><div></div><div></div><div></div><div></div><div></div><div></div><div></div><div></div><div></div><div></div><div></div><div></div><div></div><div></div><div></div><div></div><div></div><div></div><div></div><div></div><div></div><div></div><div></div><div></div><div></div><div></div><div></div><div></div><div></div><div></div><div></div><div></div><div></div><div></div><div></div><div></div><div></div><div></div><div></div><div></div><div></div><div></div><div></div><div></div><div></div><div></div><div></div><div></div><div></div><div></div><div></div><div></div><div></div><div></div><div></div><div></div><div></div><div></div><div></div><div></div><div></div><div></div><div></div><div></div><div></div><div></div><div></div><div></div><div></div><div></div><div></div><div></div><div></div><div></div><div></div><div></div><div></div><div></div><div></div><div></div><div></div><div></div><div></div><div></div><div></div><div></div><div></div><div></div><div></div><div></div><div></div><div></div><div></div><div></div><div></div><div></div><div></div><div></div><div></div><div></div><div></div><div></div><div></div><div></div><div></div><div></div><div></div><div></div><div></div><div></div><div></div><div></div><div></div><div></div><div></div><div></div><div></div><div></div><div></div><div></div><div></div><div></div><div></div><div></div><div></div><div></div><div></div><div></div><div></div><div></div><div></div><div></div><div></div><div></div><div></div><div></div><div></div><div></div><div></div><div></div><div></div><div></div><div></div><div></div><div></div><div></div><div></div><div></div><div></div><div></div><div></div><div></div><div></div><div></div><div></div><div></div><div></div><div></div><div></div><div></div><div></div><div></div><div></div><div></div><div></div><div></div><div></div><div></div><div></div><div></div><div></div><div></div><div></div><div></div><div></div><div></div><div></div><div></div><div></div><div></div><div></div><div></div><div></div><div></div><div></div><div></div><div></div><div></div><div></div><div></div><div></div><div></div><div></div><div></div><div></div><div></div><div></div><div></div><div></div><div></div><div></div><div></div><div></div><div></div><div></div><div></div><div></div><div></div><div></div><div></div><div></div><div></div><div></div><div></div><div></div><div></div><div></div><div></div><div></div><div></div><div></div><div></div><div></div><div></div><div></div><div></div><div></div><div></div><div></div><div></div><div></div><div></div><div></div><div></div><div></div><div></div><div></div><div></div><div></div><div></div><div></div><div></div><div></div><div></div><div></div><div></div><div></div><div></div><div></div><div></div><div></div><div></div><div></div><div></div><div></div><div></div><div></div><div></div><div></div><div></div><div></div><div></div><div></div><div></div><div></div><div></div><div></div><div></div><div></div><div></div><div></div><div></div><div></div><div></div><div></div><div></div><div></div><div></div><div></div><div></div><div></div><div></div><div></div><div></div><div></div><div></div><div></div><div></div><div></div><div></div><div></div><div></div><div></div><div></div><div></div><div></div><div></div><div></div><div></div><div></div><div></div><div></div><div></div><div></div><div></div><div></div><div></div><div></div><div></div><div></div><div></div><div></div><div></div><div></div><div></div><div></div><div></div><div></div><div></div><div></div><div></div><div></div><div></div><div></div><div></div><div></div><div></div><div></div><div></div><div></div><div></div><div></div><div></div><div></div><div></div><div></div><div></div><div></div><div></div><div></div><div></div><div></div><div></div><div></div><div></div><div></div><div></div><div></div><div></div><div></div><div></div><div></div><div></div><div></div><div></div><div></div><div></div><div></div><div></div><div></div><div></div><div></div><div></div><div></div><div></div><div></div><div></div><div></div><div></div><div></div><div></div><div></div><div></div><div></div><div></div><div></div><div></div><div></div><div></div><div></div><div></div><div></div><div></div><div></div><div></div><div></div><div></div><div></div><div></div><div></div><div></div><div></div><div></div><div></div><div></div><div></div><div></div><div></div><div></div><div></div><div></div><div></div><div></div><div></div><div></div><div></div><div></div><div></div><div></div><div></div><div></div><div></div><div></div><div></div><div></div><div></div><div></div><div></div><div></div><div></div><div></div><div></div><div></div><div></div><div></div><div></div><div></div><div></div><div></div><div></div><div></div><div></div><div></div><div></div><div></div><div></div><div></div><div></div><div></div><div></div><div></div><div></div><div></div><div></div><div></div><div></div><div></div><div></div><div></div><div></div><div></div><div></div><div></div><div></div><div></div><div></div><div></div><div></div><div></div><div></div><div></div><div></div><div></div><div></div><div></div><div></div><div></div><div></div><div></div><div></div><div></div><div></div><div></div><div></div><div></div><div></div><div></div><div></div><div></div><div></div><div></div><div></div><div></div><div></div><div></div><div></div><div></div><div></div><div></div><div></div><div></div><div></div><div></div><div></div><div></div><div></div><div></div><div></div><div></div><div></div><div></div><div></div><div></div><div></div><div></div><div></div><div></div><div></div><div></div><div></div><div></div><div></div><div></div><div></div><div></div><div></div><div></div><div></div><div></div><div></div><div></div><div></div><div></div><div></div><div></div><div></div><div></div><div></div><div></div><div></div><div></div><div></div><div></div><div></div><div></div><div></div><div></div><div></div><div></div><div></div><div></div><div></div><div></div><div></div><div></div><div></div><div></div><div></div><div></div><div></div><div></div><div></div><div></div><div></div><div></div><div></div><div></div><div></div><div></div><div></div><div></div><div></div><div></div><div></div><div></div><div></div><div></div><div></div><div></div><div></div><div></div><div></div><div></div><div></div><div></div><div></div><div></div><div></div><div></div><div></div><div></div><div></div><div></div><div></div><div></div><div></div><div></div><div></div><div></div><div></div><div></div><div></div><div></div><div></div><div></div><div></div><div></div><div></div><div></div><div></div><div></div><div></div><div></div><div></div><div></div><div></div><div></div><div></div><div></div><div></div><div></div><div></div><div></div><div></div><div></div><div></div><div></div><div></div><div></div><div></div><div></div><div></div><div></div><div></div><div></div><div></div><div></div><div></div><div></div><div></div><div></div><div></div><div></div><div></div><div></div><div></div><div></div><div></div><div></div><div></div><div></div><div></div><div></div><div></div><div></div><div></div><div></div><div></div><div></div><div></div><div></div><div></div><div></div><div></div><div></div><div></div><div></div><div></div><div></div><div></div><div></div><div></div><div></div><div></div><div></div><div></div><div></div><div></div><div></div><div></div><div></div><div></div><div></div><div></div><div></div><div></div><div></div><div></div><div></div><div></div><div></div><div></div><div></div><div></div><div></div><div></div><div></div><div></div><div></div><div></div><div></div><div></div><div></div><div></div><div></div><div></div><div></div><div></div><div></div><div></div><div></div><div></div><div></div><div></div><div></div><div></div><div></div><div></div><div></div><div></div><div></div><div></div><div></div><div></div><div></div><div></div><div></div><div></div><div></div><div></div><div></div><div></div><div></div><div></div><div></div><div></div><div></div><div></div><div></div><div></div><div></div><div></div><div></div><div></div><div></div><div></div><div></div><div></div><div></div><div></div><div></div><div></div><div></div><div></div><div></div><div></div><div></div><div></div><div></div><div></div><div></div><div></div><div></div><div></div><div></div><div></div><div></div><div></div><div></div><div></div><div></div><div></div><div></div><div></div><div></div><div></div><div></div><div></div><div></div><div></div><div></div><div></div><div></div><div></div><div></div><div></div><div></div><div></div><div></div><div></div><div></div><div></div><div></div><div></div><div></div><div></div><div></div><div></div><div></div><div></div><div></div><div></div><div></div><div></div><div></div><div></div><div></div><div></div><div></div><div></div><div></div><div></div><div></div><div></div><div></div><div></div><div></div><div></div><div></div><div></div><div></div><div></div><div></div><div></div><div></div><div></div><div></div><div></div><div></div><div></div><div></div><div></div><div></div><div></div><div></div><div></div><div></div><div></div><div></div><div></div><div></div><div></div><div></div><div></div><div></div><div></div><div></div><div></div><div></div><div></div><div></div><div></div><div></div><div></div><div></div><div></div><div></div><div></div><div></div><div></div><div></div><div></div><div></div><div></div><div></div><div></div><div></div><div></div><div></div><div></div><div></div><div></div><div></div><div></div><div></div><div></div><div></div><div></div><div></div><div></div><div></div><div></div><div></div><div></div><div></div><div></div><div></div><div></div><div></div><div></div><div></div><div></div><div></div><div></div><div></div><div></div><div></div><div></div><div></div><div></div><div></div><div></div><div></div><div></div><div></div><div></div><div></div><div></div><div></div><div></div><div></div><div></div><div></div><div></div><div></div><div></div><div></div><div></div><div></div><div></div><div></div><div></div><div></div><div></div><div></div><div></div><div></div><div></div><div></div><div></div><div></div><div></div><div></div><div></div><div></div><div></div><div></div><div></div><div></div><div></div><div></div><div></div><div></div><div></div><div></div><div></div><div></div><div></div><div></div><div></div><div></div><div></div><div></div><div></div><div></div><div></div><div></div><div></div><div></div><div></div><div></div><div></div><div></div><div></div><div></div><div></div><div></div><div></div><div></div><div></div><div></div><div></div><div></div><div></div><div></div><div></div><div></div><div></div><div></div><div></div><div></div><div></div><div></div><div></div><div></div><div></div><div></div><div></div><div></div><div></div><div></div><div></div><div></div><div></div><div></div><div></div><div></div><div></div><div></div><div></div><div></div><div></div><div></div><div></div><div></div><div></div><div></div><div></div><div></div><div></div><div></div><div></div><div></div><div></div><div></div><div></div><div></div><div></div><div></div><div></div><div></div><div></div><div></div><div></div><div></div><div></div><div></div><div></div><div></div><div></div><div></div><div></div><div></div><div></div><div></div><div></div><div></div><div></div><div></div><div></div><div></div><div></div><div></div><div></div><div></div><div></div><div></div><div></div><div></div><div></div><div></div><div></div><div></div><div></div><div></div><div></div><div></div><div></div><div></div><div></div><div></div><div></div><div></div><div></div><div></div><div></div><div></div><div></div><div></div><div></div><div></div><div></div><div></div><div></div><div></div><div></div><div></div><div></div><div></div><div></div><div></div><div></div><div></div><div></div><div></div><div></div><div></div><div></div><div></div><div></div><div></div><div></div><div></div><div></div><div></div><div></div><div></div><div></div></div> |      |      |      |      |      |      |      |  |

|              | 1220                                                                                                                                                                                                                                                                                                                                                                                                                                                                                                                                                                                                                                                                                                                                                                                                                                                                                                                                                                                                                                                                                                                                                                                                                                                                                                                                                                                                                                                                                                                                                                                                                                                                                                                                                                                                                                                                                                                                                                                                                                                                                                                                                                                                                                                                                                                                                                                                                                                                                                                                                                                                                                                                                                                                                                                                                                                                                                                                                                                                                                                                                                                                                                                                                                                                                                                                                                                                                                                                                                                                                                                                                                                                                                                                                                                                                                                                                                                                                                                                                                                                                                                                                                                                                                                                                                                                                                                                                                                                                                                                                                                                                                                                                                                                                                                                                                                                                                                                                                                                                                                                                                                                                                                                                                                                                                                                                                                                                                                                                                                                                                                                                                                                                                                                                                                                                                                                                                                                                                                                                                                                                                                                                                                                                                                                                                                                                                                                                                                                                                                                                                                                                                                                                                                                                                                                                                                                                                                                                                                                                                                                                                                                                                                                                                                                                                                                                                                                                                                                                                                                                                                                                                                                                                                                                                                                                                                                                                                                                                                                                                                                                                                                                                                                                                                                                                                                                                                                                                                                                                                                                                                                                                                                                                                                                                                                                                                                                                                                                                                                                                                                                                                                                                                                                                                                                                                                                                                                                                                                                                                                                                                                                                                                                                                                                                                                                                                                                                                                                                                                                                                                                                                                                                                                                                                                                                                                                                                                                                                                                                                                                                                                                                                                                                                                                                                                                                                                                                                                                                                                                                                                                                                                                                                                                                                                                                                                                                                                                                                                                                                                                                                                                                                                                                                                                                                                                                                                                                                                                                                                                                                                                                                                                                                                                                                                                                                                                                                                                                                                                                                                                                                                                                                                                                                                                                                            | 1230 | 1240 | 1250 | 1260 | 1270 | 1280 | 1290 |  |
|--------------|-------------------------------------------------------------------------------------------------------------------------------------------------------------------------------------------------------------------------------------------------------------------------------------------------------------------------------------------------------------------------------------------------------------------------------------------------------------------------------------------------------------------------------------------------------------------------------------------------------------------------------------------------------------------------------------------------------------------------------------------------------------------------------------------------------------------------------------------------------------------------------------------------------------------------------------------------------------------------------------------------------------------------------------------------------------------------------------------------------------------------------------------------------------------------------------------------------------------------------------------------------------------------------------------------------------------------------------------------------------------------------------------------------------------------------------------------------------------------------------------------------------------------------------------------------------------------------------------------------------------------------------------------------------------------------------------------------------------------------------------------------------------------------------------------------------------------------------------------------------------------------------------------------------------------------------------------------------------------------------------------------------------------------------------------------------------------------------------------------------------------------------------------------------------------------------------------------------------------------------------------------------------------------------------------------------------------------------------------------------------------------------------------------------------------------------------------------------------------------------------------------------------------------------------------------------------------------------------------------------------------------------------------------------------------------------------------------------------------------------------------------------------------------------------------------------------------------------------------------------------------------------------------------------------------------------------------------------------------------------------------------------------------------------------------------------------------------------------------------------------------------------------------------------------------------------------------------------------------------------------------------------------------------------------------------------------------------------------------------------------------------------------------------------------------------------------------------------------------------------------------------------------------------------------------------------------------------------------------------------------------------------------------------------------------------------------------------------------------------------------------------------------------------------------------------------------------------------------------------------------------------------------------------------------------------------------------------------------------------------------------------------------------------------------------------------------------------------------------------------------------------------------------------------------------------------------------------------------------------------------------------------------------------------------------------------------------------------------------------------------------------------------------------------------------------------------------------------------------------------------------------------------------------------------------------------------------------------------------------------------------------------------------------------------------------------------------------------------------------------------------------------------------------------------------------------------------------------------------------------------------------------------------------------------------------------------------------------------------------------------------------------------------------------------------------------------------------------------------------------------------------------------------------------------------------------------------------------------------------------------------------------------------------------------------------------------------------------------------------------------------------------------------------------------------------------------------------------------------------------------------------------------------------------------------------------------------------------------------------------------------------------------------------------------------------------------------------------------------------------------------------------------------------------------------------------------------------------------------------------------------------------------------------------------------------------------------------------------------------------------------------------------------------------------------------------------------------------------------------------------------------------------------------------------------------------------------------------------------------------------------------------------------------------------------------------------------------------------------------------------------------------------------------------------------------------------------------------------------------------------------------------------------------------------------------------------------------------------------------------------------------------------------------------------------------------------------------------------------------------------------------------------------------------------------------------------------------------------------------------------------------------------------------------------------------------------------------------------------------------------------------------------------------------------------------------------------------------------------------------------------------------------------------------------------------------------------------------------------------------------------------------------------------------------------------------------------------------------------------------------------------------------------------------------------------------------------------------------------------------------------------------------------------------------------------------------------------------------------------------------------------------------------------------------------------------------------------------------------------------------------------------------------------------------------------------------------------------------------------------------------------------------------------------------------------------------------------------------------------------------------------------------------------------------------------------------------------------------------------------------------------------------------------------------------------------------------------------------------------------------------------------------------------------------------------------------------------------------------------------------------------------------------------------------------------------------------------------------------------------------------------------------------------------------------------------------------------------------------------------------------------------------------------------------------------------------------------------------------------------------------------------------------------------------------------------------------------------------------------------------------------------------------------------------------------------------------------------------------------------------------------------------------------------------------------------------------------------------------------------------------------------------------------------------------------------------------------------------------------------------------------------------------------------------------------------------------------------------------------------------------------------------------------------------------------------------------------------------------------------------------------------------------------------------------------------------------------------------------------------------------------------------------------------------------------------------------------------------------------------------------------------------------------------------------------------------------------------------------------------------------------------------------------------------------------------------------------------------------------------------------------------------------------------------------------------------------------------------------------------------------------------------------------------------------------------------------------------------------------------------------------------------------------------------------------------------------------------------------------------------------------------------------------------------------------------------------------------------------------------------------------------------------------------------------------------------------------------------------------------------------------------------------------------------------------------------------------------------------------------------------------------------------------------------------------------------------------------------------------------------------------------------------------------------------------------------------------------------------------------------------------------------------------------------------------------------------------------------------------------------------------------------------------------------------------------------------------------------------------------------------------------------------------------------------------------------------------------------------------------------------------------------------------------------------------------------------------------------------------------------------------------------------------------------------------------------------------------------------------------------------------------------------------------------------------------------------------------------------------------------------------------------------------------------------------------------------------------------------------------------------------------------------------------------------------------------------------------------------------------------------------------------------------------------------------------------------------------------------------------------------------------------------------------------------------------------------------------------------------------------------------------------------------------------------------------------------------------------------------------------------------------------------------------------------------------------------------------------------------------------------------------------------------------------------------------------------------------------------------------------------------------------------------------------------------------------------------------------------------------------------------------------------------------------------|------|------|------|------|------|------|------|--|
| conservation | ●●●●●●●●●●●●●●●●●●●●●●●●●●●●●●●●●●●●●●●●●●●●●●●●●●●●●●●●●●●●●●●●●●●●●●●●●●●●●●●●●●●●●●●●●●●●●●●●●●●●●●●●●●●●●●●●●●●●●●●●●●●●●●●●●●●●●●●●●●●●●●●●●●●●●●●●●●●●●●●●●●●●●●●●●●●●●●●●●●●●●●●●●●●●●●●●●●●●●●●●●●●●●●●●●●●●●●●●●●●●●●●●●●●●●●●●●●●●●●●●●●●●●●●●●●●●●●●●●●●●●●●●●●●●●●●●●●●●●●●●●●●●●●●●●●●●●●●●●●●●●●●●●●●●●●●●●●●●●●●●●●●●●●●●●●●●●●●●●●●●●●●●●●●●●●●●●●●●●●●●●●●●●●●●●●●●●●●●●●●●●●●●●●●●●●●●●●●●●●●●●●●●●●●●●●●●●●●●●●●●●●●●●●●●●●●●●●●●●●●●●●●●●●●●●●●●●●●●●●●●●●●●●●●●●●●●●●●●●●●●●●●●●●●●●●●●●●●●●●●●●●●●●●●●●●●●●●●●●●●●●●●●●●●●●●●●●●●●●●●●●●●●●●●●●●●●●●●●●●●●●●●●●●●●●●●●●●●●●●●●●●●●●●●●●●●●●●●●●●●●●●●●●●●●●●●●●●●●●●●●●●●●●●●●●●●●●●●●●●●●●●●●●●●●●●●●●●●●●●●●●●●●●●●●●●●●●●●●●●●●●●●●●●●●●●●●●●●●●●●●●●●●●●●●●●●●●●●●●●●●●●●●●●●●●●●●●●●●●●●●●●●●●●●●●●●●●●●●●●●●●●●●●●●●●●●●●●●●●●●●●●●●●●●●●●●●●●●●●●●●●●●●●●●●●●●●●●●●●●●●●●●●●●●●●●●●●●●●●●●●●●●●●●●●●●●●●●●●●●●●●●●●●●●●●●●●●●●●●●●●●●●●●●●●●●●●●●●●●●●●●●●●●●●●●●●●●●●●●●●●●●●●●●●●●●●●●●●●●●●●●●●●●●●●●●●●●●●●●●●●●●●●●●●●●●●●●●●●●●●●●●●●●●●●●●●●●●●●●●●●●●●●●●●●●●●●●●●●●●●●●●●●●●●●●●●●●●●●●●●●●●●●●●●●●●●●●●●●●●●●●●●●●●●●●●●●●●●●●●●●●●●●●●●●●●●●●●●●●●●●●●●●●●●●●●●●●●●●●●●●●●●●●●●●●●●●●●●●●●●●●●●●●●●●●●●●●●●●●●●●●●●●●●●●●●●●●●●●●●●●●●●●●●●●●●●●●●●●●●●●●●●●●●●●●●●●●●●●●●●●●●●●●●●●●●●●●●●●●●●●●●●●●●●●●●●●●●●●●●●●●●●●●●●●●●●●●●●●●●●●●●●●●●●●●●●●●●●●●●●●●●●●●●●●●●●●●●●●●●●●●●●●●●●●●●●●●●●●●●●●●●●●●●●●●●●●●●●●●●●●●●●●●●●●●●●●●●●●●●●●●●●●●●●●●●●●●●●●●●●●●●●●●●●●●●●●●●●●●●●●●●●●●●●●●●●●●●●●●●●●●●●●●●●●●●●●●●●●●●●●●●●●●●●●●●●●●●●●●●●●●●●●●●●●●●●●●●●●●●●●●●●●●●●●●●●●●●●●●●●●●●●●●●●●●●●●●●●●●●●●●●●●●●●●●●●●●●●●●●●●●●●●●●●●●●●●●●●●●●●●●●●●●●●●●●●●●●●●●●●●●●●●●●●●●●●●●●●●●●●●●●●●●●●●●●●●●●●●●●●●●●●●●●●●●●●●●●●●●●●●●●●●●●●●●●●●●●●●●●●●●●●●●●●●●●●●●●●●●●●●●●●●●●●●●●●●●●●●●●●●●●●●●●●●●●●●●●●●●●●●●●●●●●●●●●●●●●●●●●●●●●●●●●●●●●●●●●●●●●●●●●●●●●●●●●●●●●●●●●●●●●●●●●●●●●●●●●●●●●●●●●●●●●●●●●●●●●●●●●●●●●●●●●●●●●●●●●●●●●●●●●●●●●●●●●●●●●●●●●●●●●●●●●●●●●●●●●●●●●●●●●●●●●●●●●●●●●●●●●●●●●●●●●●●●●●●●●●●●●●●●●●●●●●●●●●●●●●●●●●●●●●●●●●●●●●●●●●●●●●●●●●●●●●●●●●●●●●●●●●●●●●●●●●●●●●●●●●●●●●●●●●●●●●●●●●●●●●●●●●●●●●●●●●●●●●●●●●●●●●●●●●●●●●●●●●●●●●●●●●●●●●●●●●●●●●●●●●●●●●●●●●●●●●●●●●●●●●●●●●●●●●●●●●●●●●●●●●●●●●●●●●●●●●●●●●●●●●●●●●●●●●●●●●●●●●●●●●●●●●●●●●●●●●●●●●●●●●●●●●●●●●●●●●●●●●●●●●●●●●●●●●●●●●●●●●●●●●●●●●●●●●●●●●●●●●●●●●●●●●●●●●●●●●●●●●●●●●●●●●●●●●●●●●●●●●●●●●●●●●●●●●●●●●●●●●●●●●●●●●●●●●●●●●●●●●●●●●●●●●●●●●●●●●●●●●●●●●●●●●●●●●●●●●●●●●●●●●●●●●●●●●●●●●●●●●●●●●●●●●●●●●●●●●●●●●●●●●●●●●●●●●●●●●●●●●●●●●●●●●●●●●●●●●●●●●●●●●●●●●●●●●●●●●●●●●●●●●●●●●●●●●●●●●●●●●●●●●●●●●●●●●●●●●●●●●●●●●●●●●●●●●●●●●●●●●●●●●●●●●●●●●●●●●●●●●●●●●●●●●●●●●●●●●●●●●●●●●●●●●●●●●●●●●●●●●●●●●●●●●●●●●●●●●●●●●●●●●●●●●●●●●●●●●●●●●●●●●●●●●●●●●●●●●●●●●●●●●●●●●●●●●●●●●●●●●●●●●●●●●●●●●●●●●●●●●●●●●●●●●●●●●●●●●●●●●●●●●●●●●●●●●●●●●●●●●●●●●●●●●●●●●●●●●●●●●●●●●●●●●●●●●●●●●●●●●●●●●●●●●●●●●●●●●●●●●●●●●●●●●●●●●●●●●●●●●●●●●●●●●●●●●●●●●●●●●●●●●●●●●●●●●●●●●●●●●●●●●●●●●●●●●●●●●●●●●●●●●●●●●●●●●●●●●●●●●●●●●●●●●●●●●●●●●●●●●●●●●●●●●●●●●●●●●●●●●●●●●●●●●●●●●●●●●●●●●●●●●●●●●●●●●●●●●●●●●●●●●●●●●●●●●●●●●●●●●●●●●●●●●●●●●●●●●●●●●●●●●●●●●●●●●●●●●●●●●●●●●●●●●●●●●●●●●●●●●●●●●●●●●●●●●●●●●●●●●●●●●●●●●●●●●●●●●●●●●●●●●●●●●●●●●●●●●●●●●●●●●●●●●●●●●●●●●●●●●●●●●●●●●●●●●●●●●●●●●●●●●●●●●●●●●●●●●●●●●●●●●●●●●●●●●●●●●●●●●●●●●●●●●●●●●●●●●●●●●●●●●●●●●●●●●●●●●●●●●●●●●●●●●●●●●●●●●●●●●●●●●●●●●●●●●●●●●●●●●●●●●●●●●●●●●●●●●●●●●●●●●●●●●●●●●●●●●●●●●●●●●●●●●●●●●●●●●●●●●●●●●●●●●●●●●●●●●●●●●●●●●●●●●●●●●●●●●●●●●●●●●●●●●●●●●●●●●●●●●●●●●●●●●●●●●●●●●●●●●●●●●●●●●●●●●●●●●●●●●●●●●●●●●●●●●●●●●●●●●●●●●●●●●●●●●●●●●●●●●●●●●●●●●●●●●●●●●●●●●●●●●●●●●●●●●●●●●●●●●●●●●●●●●●●●●●●●●●●●●●●●●●●●●●●●●●●●●●●●●●●●●●●●●●●●●●●●●●●●●●●●●●●●●●●●●●●●●●●●●●●●●●●●●●●●●●●●●●●●●●●●●●●●●●●●●●●●●●●●●●●●●●●●●●●●●●●●●●●●●●●●●●●●●●●●●●●●●●●●●●●●●●●●●●●●●●●●●●●●●●●●●●●●●●●●●●●●●●●●●●●●●●●●●●●●●●●●●●●●●●●●●●●●●●●●●●●●●●●●●●●●●●●●●●●●●●●●●●●●●●●●●●●●●●●●●●●●●●●●●●●●●●●●●●●●●●●●●●●●●●●●●●●●●●●●●●●●●●●●●●●●●●●●●●●●●●●●●●●●●●●●●●●●●●●●●●●●●●●●●●●●●●●●●●●●●●●●●●●●●●●●●●●●●●●●●●●●●●●●●●●●●●●●●●●●●●●●●●●●●●●●●●●●●●●●●●●●●●●●●●●●●●●●●●●●●●●●●●●●●●●●●●●●●●●●●●●●●●●●●●●●●●●●●●●●●●●●●●●●●●●●●●●●●●●●●●●●●●●●●●●●●●●●●●●●●●●●●●●●●●●●●●●●●●●●●●●●●●●●●●●●●●●●●●●●●●●●●●●●●●●●●●●●●●●●●●●●●●●●●●●●●●●●●●●●●●●●●●●●●●●●●●●●●●●●●●●●●●●●●●●●●●●●●●●●●●●●●●●●●●●●●●●●●●●●●●●●●●●●●●●●●●●●●●●●●●●●●●●●●●●●●●●●●●●●●●●●●●●●●●●●●●●●●●●●●●●●●●●●●●●●●●●●●●●●●●●●●●●●●●●●●●●●●●●●●●●●●●●●●●●●●●●●●●●●●●●●●●●●●●●●●●●●●●●●●●●●●●●●●●●●●●●●●●●●●●●●●●●●●●●●●●●●●●●●●●●●●●●●●●●●●●●●●●●●●●●●●●●●●●●●●●●●●●●●●●●●●●●●●●●●●●●●●●●●●●●●●●●●●●●●●●●●●●●●●●●●●●●●●●●●●●●●●●●●●●●●●●●●●●●●●●●●●●●●●●●●●●●●●●●●●●●●●●●●●●●●●●●●●●●●●●●●●●●●●●●●●●●●●●●●●●●●●●●●●●●●●●●●●●●●●●●●●●●●●●●●●●●●●●●●●●●●●●●●●●●●●●●●●●●●●●●●●●●●●●●●●●●●●●●●●●●●●●●●●●●●●●●●●●●●●●●●●●●●●●●●●●●●●●●●●●●●●●●●●●●●●●●●●●●●●●●●●●●●●●●●●●●●●●●●●●●●●●●●●●●●●●●●●●●●●●●●●●●●●●●●●●●●●●●●●●●●●●●●●●●●●●●●●●●●●●●●●●●●●●●●●●●●●●●●●●●●●●●●●●●●●●●●●●●●●●●●●●●●●●●●●●●●●●●●●●●●●●●●●●●●●●●●●●●●●●●●●●●●●●●●●●●●●●●●●●●●●●●●●●●●●●●●●●●●●●●●●●●●●●●●●●●●●●●●●●●●●●●●●●●●●●●●●●●●●●●●●●●●●●●●●●●●●●●●●●●●●●●●●●●●●●●●●●●●●●●●●●●●●●●●●●●●●●●●●●●●●●●●●●●●●●●●●●●●●●●●●●●●●●●●●●●●●●●●●●●●●●●●●●●●●●●●●●●●●●●●●●●●●●●●●●●●●●●●●●●●●●●●●●●●●●●●●●●●●●●●●●●●●●●●●●●●●●●●●●●●●●●●●●●●●●●●●●●●●●●●●●●●●●●●●●●●●●●●●●●●●●●●●●●●●●●●●●●●●●●●●●●●●●●●●●●●●●●●●●●●●●●●●●●●●●●●●●●●●●●●●●●●●●●●●●●●●●●●●●●●●●●●●●●●●●●●●●●●●●●●●●●●●●●●●●●●●●●●●●●●●●●●●●●●●●●●●●●●●●●●●●●●●●●●●●●●●●●●●●●●●●●●●●●●●●●●●●●●●●●●●●●●●●●●●●●●●●●●●●●●●●●●●●●●●●●●●●●●●●●●●●●●●●●●●●●●●●●●●●●●●●●●●●●●●●●●●●●●●●●●●●●●●●●●●●●●●●●●●●●●●●●●●●●●●●●●●●●●●●●●●●●●●●●●●●●●●●●●●●●●●●●●●●●●●●●●●●●●●●●●●●●●●●●●●●●●●●●●●●●●●●●●●●●●●●●●●●●●●●●●●●●●●●●●●●●●●●●●●●●●●●●●●●●●●●●●●●●●●●●●●●●●●●●●●●●●●●●●●●●●●●●●●●●●●●●●●●●●●●●●●●●●●●●●●●●●●●●●●●●●●●●●●●●●●●●●●●●●●●●●●●●●●●●●●●●●●●●●●●●●●●●●●●●●●●●●●●●●●●●●●●●●●●●●●●●●●●●●●●●●●●●●●●●●●●●●●●●●●●●●●●●●●●●●●●●●●●●●●●●●●●●●●●●●●●●●●●●●●●●●●●●●●●●●●●●●●●●●●●●●●●●●●●●●●●●●●●●●●●●●●●●●●●●●●●●●●●●●●●●●●●●●●●●●●●●●●●●●●●●●●●●●●●●●●●●●●●●●●●●●●●●●●●●●●●●●●●●●●●●●●●●●●●●●●●●●●●●●●●●●●●●●●●●●●●●●●●●●●●●●●●●●●●●●●●●●●●●●●●●●●●●●●●●●●●●●●●●●●●●●●●●●●●●●●●●●●●●●●●●●●●●●●●●●●●●●●●●●●●●●●●●●●●●●●●●●●●●●●●●●●●●●●●●●●●●●●●●●●●●●●●●●●●●●●●●●●●●●●●●●●●●●●●●●●●●●●●●●●●●●●●●●●●●●●●●●●●●●●●●●●●●●●●●●●●●●●●●●●●●●●●●●●●●●●●●●●●●●●●●●●●●●●●●●●●●●●●●●●●●●●●●●●●●●●●●●●●●●●●●●●●●●●●●●●●●●●●●●●●●●●●●●●●●●●●●●●●●●●●●●●●●●●●●●●●●●●●●●●●●●●●●●●●●●●●●●●●●●●●●●●●●●●●●●●●●●●●●●●●●●●●●●●●●●●●●●●●●●●●●●●●●●●●●●●●●●●●●●●●●●●●●●●●●●●●●●●●●●●●●●●●●●●●●●●●●●●●●●●●●●●●●●●●●●●●●●●●●●●●●●●●●●●●●●●●●●●●●●●●●●●●●●●●●●●●●●●●●●●●●●●●●●●●●●●●●●●●●●●●●●●●●●●●●●●●●●●●●●●●●●●●●●●●●●●●●●●●●●●●●●●●●●●●●●●●●●●●●●●●●●●●●●●●●●●●●●●●●●●●●●●●●●●●●●●●●●●●●●●●●●●●●●●●●●●●●●●●●●●●●●●●●●●●●●●●●●●●●●●●●●●●●●●●●●●●●●●●●●●●●●●●●●●●●●●●●●●●●●●●●●●●●●●●●●●●●●●●●●●●●●●●●●●●●●●●●●●●●●●●●●●●●●●●●●●●●●●●●●●●●●●●●●●●●●●●●●●●●●●●●●●●●●●●●●●●●●●●●●●●●●●●●●●●●●●●●●●●●●●●●●●●●●●●●●●●●●●●●●●●●●●●●●●●●●●●●●●●●●●●●●●●●●●●●●●●●●●●●●●●●●●●●●●●●●●●●●●●●●●●●●●●●●●●●●●●●●●●●●●●●●●●●●●●●●●●●●●●●●●●●●●●●●●●●●●●●●●●●●●●●●●●●●●●●●●●●●●●●●●●●●●●●●●●●●●●●●●●●●●●●●●●●●●●●●●●●●●●●●●●●●●●●●●●●●●●●●●●●●●●●●●●●●●●●●●●●●●●●●●●●●●●●●●●●●●●●●●●●●●●●●●●●●●●●●●●●●●●●●●●●●●●●●●●●●●●●●●●●●●●●●●●●●●●●●●●●●●●●●●●●●●●●●●●●●●●●●●●●●●●●●●●●●●●●●●●●●●●●●●●●●●●●●●●●●●●●●●●●●●●●●●●●●●●●●●●●●●●●●●●●●●●●●●●●●●●●●●●●●●●●●●●●●●●●●●●●●●●●●●●●●●●●●●●●●●●●●●●●●●●●●●●●●●●●●●●●●●●●●●●●●●●●●●●●●●●●●●●●●●●●●●●●●●●●●●●●●●●●●●●●●●●●●●●●●●●●●●●●●●●●●●●●●●●●●●●●●●●●●●●●●●●●●●●●●●●●●●●●●●●●●●●●●●●●●●●●●●●●●●●●●●●●●●●●●●●●●●●●●●●●●●●●●●●●●●●●●●●●●●●●●●●●●●●●●●●●●●●●●●●●●●●●●●●●●●●●●●●●●●●●●●●●●●●●●●●●●●●●●●●●●●●●●●●●●●●●●●●●●●●●●●●●●●●●●●●●●●●●●●●●●●●●●●●●●●●●●●●●●●●●●●●●●●●●●●●●●●●●●●●●●●●●●●●●●●●●●●●●●●●●●●●●●●●●●●●●●●●●●●●●●●●●●●●●●●●●●●●●●●●●●●●●●●●●●●●●●●●●●●●●●●●●●●●●●●●●●●●●●●●●●●●●●●●●●●●●●●●●●●●●●●●●●●●●●●●●●●●●●●●●●●●●●●●●●●●●●●●●●●●●●●●●●●●●●●●●●●●●●●●●●●●●●●●●●●●●●●●●●●●●●●●●●●●●●●●●●●●●●●●●●●●●●●●●●●●●●●●●●●●●●●●●●●●●●●●●●●●●●●●●●●●●●●●●●●●●●●●●●●●●●●●●●●●●●●●●●●●●●●●●●●●●●●●●●●●●●●●●●●●●●●●●●●●●●●●●●●●●●●●●●●●●●●●●●●●●●●●●●●●●●●●●●●●●●●●●●●●●●●●●●●●●●●●●●●●●●●●●●●●●●●●●●●●●●●●●●●●●●●●●●●●●●●●●●●●●●●●●●●●●●●●●●●●●●●●●●●●●●●●●●●●●●●●●●●●●●●●●●●●●●●●●●●●●●●●●●●●●●●●●●●●●●●●●●●●●●●●●●●●●●●●●●●●●●●●●●●●●●●●●●●●●●●●●●●●●●●●●●●●●●●●●●●●●●●●●●●●●●●●●●●●●●●●●●●●●●●●●●●●●●●●●●●●●●●●●●●●●●●●●●●●●●●●●●●●●●●●●●●●●●●●●●●●●●●●●●●●●●●●●●●●●●●●●●●●●●●●●●●●●●●●●●●●●●●●●●●●●●●●●●●●●●●●●●●●●●●●●●●●●●●●●●●●●●●●●●●●●●●●●●●●●●●●●●●●●●●●●●●●●●●●●●●●●●●●●●●●●●●●●●●●●●●●●●●●●●●●●●●●●●●●●●●●●●●●●●●●●●●●●●●●●●●●●●●●●●●●●●●●●●●●●●●●●●●●●●●●●●●●●●●●●●●●●●●●●●●●●●●●●●●●●●●●●●●●●●●●●●●●●●●●●●●●●●●●●●●●●●●●●●●●●●●●●●●●●●●●●●●●●●●●●●●●●●●●●●●●●●●●●●●●●●●●●●●●●●●●●●●●●●●●●●●●●●●●●●●●●●●●●●●●●●●●●●●●●●●●●●●●●●●●●●●●●●●●●●●●●●●●●●●●●●●●●●●●●●●●●●●●●●●●●●●●●●●●●●●●●●●●●●●●●●●●●●●●●●●●●●●●●●●●●●●●●●●●●●●●●●●●●●●●●●●●●●●●●●●●●●●●●●●●●●●●●●●●●●●●●●●●●●●●●●●●●●●●●●●●●●●●●●●●●●●●●●●●●●●●●●●●●●●●●●●●●●●●●●●●●●●●●●●●●●●●●●●●●●●●●●●●●●●●●●●●●●●●●●●●●●●●●●●●●●●●●●●●●●●●●●●●●●●●●●●●●●●●●●●●●●●●●●●●●●●●●●●●●●●●●●●●●●●●●●●●●●●●●●●●●●●●●●●●●●●●●●●●●●●●●●●●●●●●●●●●●●●●●●●●●●●●●●●●●●●●●●●●●●●●●●●●●●●●●●●●●●●●●●●●●●●●●●●●●●●●●●●●●●●●●●●●●●●●●●●●●●●●●●●●●●●●●●●●●●●●●●●●●●●●●●●●●●●●●●●●●●●●●●●●●●●●●●●●●●●●●●●●●●●●●●●●●●●●●●●●●●●●●●●●●●●●●●●●●●●●●●●●●●●●●●●●●●●●●●●●●●●●●●●●●●●●●●●●●●●●●●●●●●●●●●●●●●●●●●●●●●●●●●●●●●●●●●●●●●●●●●●●●●●●●●●●●●●●●●●●●●●●●●●●●●●●●●●●●●●●●●●●●●●●●●●●●●●●●●●●●●●●●●●●●●●●●●●●●●●●●●●●●●●●●●●●●●●●●●●●●●●●●●●●●●●●●●●●●●●●●●●●●●●●●●●●●●●●●●●●●●●●●●●●●●●●●●●●●●●●●●●●●●●●●●●●●●●●●●●●●●●●●●●●●●●●●●●●●●●●●●●●●●●●●●●●●●●●●●●●●●●●●●●●●●●●●●●●●●●●●●●●●●●●●●●●●●●●●●●●●●●●●●●●●●●●●●●●●●●●●●●●●●●●●●●●●●●●●●●●●●●●●●●●●●●●●●●●●●●●●●●●●●●●●●●●●●●●●●●●●●●●●●●●●●●●●●●●●●●●●●●●●●●●●●●●●●●●●●●●●●●●●●●●●●●●●●●●●●●●●●●●●●●●●●●●●●●●●●●●●●●●●●●●●●●●●●●●●●●●●●●●●●●●●●●●●●●●●●●●●●●●●●●●●●●●●●●●●●●●●●●●●●●●●●●●●●●●●●●●●●●●●●●●●●●●●●●●●●●●●●●●●●●●●●●●●●●●●●●●●●●●●●●●●●●●●●●●●●●●●●●●●●●●●●●●●●●●●●●●●●●●●●●●●●●●●●●●●●●●●●●●●●●●●●●●●●●●●●●●●●●●●●●●●●●●●●●●●●●●●●●●●●●●●●●●●●●●●●●●●●●●●●●●●●●●●●●●●●●●●●●●●●●●●●●●●●●●●●●●●●●●●●●●●●●●●●●●●●●●●●●●●●●●●●●●●●●●●●●●●●●●●●●●●●●●●●●●●●●●●●●●●●●●●●●●●●●●●●●●●●●●●●●●●●●●●●●●●●●●●●●●●●●●●●●●●●●●●●●●●●●●●●●●●●●●●●●●●●●●●●●●●●●●●●●●●●●●●●●●●●●●●●●●●●●●●●●●●●●●●●●●●●●●●●●●●●●●●●●●●●●●●●●●●●●●●●●●●●●●●●●●●●●●●●●●●●●●●●●●●●●●●●●●●●●●●●●●●●●●●●●●●●●●●●●●●●●●●●●●●●●●●●●●●●●●●●●●●●●●●●●●●●●●●●●●●●●●●●●●●●●●●●●●●●●●●●●●●●●●●●●●●●●●●●●●●●●●●●●●●●●●●●●●●●●●●●●●●●●●●●●●●●●●●●●●●●●●●●●●●●●●●●●●●●●●●●●●●●●●●●●●●●●●●●●●●●●●●●●●●●●●●●●●●●●●●●●●●●●●●●●●●●●●●●●●●●●●●●●●●●●●●●●●●●●●●●●●●●●●●●●●●●●●●●●●●●●●●●●●●●●●●●●●●●●●●●●●●●●●●●●●●●●●●●●●●●●●●●●●●●●●●●●●●●●●●●●●●●●●●●●●●●●●●●●●●●●●●●●●●●●●●●●●●●●●●●●●●●●●●●●●●●●●●●●●●●●●●●●●●●●●●●●●●●●●●●●●●●●●●●●●●●●●●●●●●●●●●●●●●●●●●●●●●●●●●●●●●●●●●●●●●●●●●●●●●●●●●●●●●●●●●●●●●●●●●●●●●●●●●●●●●●●●●●●●●●●●●●●●●●●●●●●●●●●●●●●●●●●●●●●●●●●●●●●●●●●●●●●●●●●●●●●●●●●●●●●●●●●●●●●●●●●●●●●●●●●●●●●●●●●●●●●●●●●●●●●●●●●●●●●●●●●●●●●●●●●●●●●●●●●●●●●●●●●●●●●●●●●●●●●●●●●●●●●●●●●●●●●●●●●●●●●●●●●●●●●●●●●●●●●●●●●●●●●●●●●●●●●●●●●●●●●●●●●●●●●●●●●●●●●●●●●●●●●●●●●●●●●●●●●●●●●●●●●●●●●●●●●●●●●●●●●●●●●●●●●●●●●●●●●●●●●●●●●●●●●●●●●●●●●●●●●●●●●●●●●●●●●●●●●●●●●●●●●●●●●●●●●●●●●●●●●●●●●●●●●●●●●●●●●●●●●●●●●●●●●●●●●●●●●●●●●●●●●●●●●●●●●●●●●●●●●●●●●●●●●●●●●●●●●●●●●●●●●●●●●●●●●●●●●●●●●●●●●●●●●●●●●●●●●●●●●●●●●●●●●●●●●●●●●●●●●●●●●●●●●●●●●●●●●●●●●●●●●●●●●●●●●●●●●●●●●●●●●●●●●●●●●●●●●●●●●●●●●●●●●●●●●●●●●●●●●●●●●●●●●●●●●●●●●●●●●●●●●●●●●●●●●●●●●●●●●●●●●●●●●●●●●●●●●●●●●●●●●●●●●●●●●●●●●●●●●●●●●●●●●●●●●●●●●●●●●●●●●●●●●●●●●●●●●●●●●●●●●●●●●●●●●●●●●●●●●●●●●●●●●●●●●●●●●●●●●●●●●●●●●●●●●●●●●●●●●●●●●●●●●●●●●●●●●●●●●●●●●●●●●●●●●●●●●●●●●●●●●●●●●●●●●●●●●●●●●●●●●●●●●●●●●●●●●●●●●●●●●●●●●●●●●●●●●●●●●●●●●●●●●●●●●●●●●●●●●●●●●●●●●●●●●●●●●●●●●●●●●●●●●●●●●●●●●●●●●●●●●●●●●●●●●●●●●●●●●●●●●●●●●●●●●●●●●●●●●●●●●●●●●●●●●●●●●●●●●●●●●●●●●●●●●●●●●●●●●●●●●●●●●●●●●●●●●●●●●●●●●●●●●●●●●●●●●●●●●●●●●●●●●●●●●●●●●●●●●●●●●●●●●●●●●●●●●●●●●●●●●●●●●●●●●●●●●●●●●●●●●●●●●●●●●●●●●●●●●●●●●●●●●●●●●●●●●●●●●●●●●●●●●●●●●●●●●●●●●●●●●●●●●●●●●●●●●●●●●●●●●●●●●●●●●●●●●●●●●●●●●●●●●●●●●●●●●●●●●●●●●●●●●●●●●●●●●●●●●●●●●●●●●●●●●●●●●●●●●●●●●●●●●●●●●●●●●●●●●●●●●●●●●●●●●●●●●●●●●●●●●●●●●●●●●●●●●●●●●●●●●●●●●●●●●●●●●●●●●●●●●●●●●●●●●●●●●●●●●●●●●●●●●●●●●●●●●●●●●●●●●●●●●●●●●●●●●●●●●●●●●●●●●●●●●●●●●●●●●●●●●●●●●●●●●●●●●●●●●●●●●●●●●●●●●●●●●●●●●●●●●●●●●●●●●●●●●●●●●●●●●●●●●●●●●●●●●●●●●●●●●●●●●●●●●●●●●●●●●●●●●●●●●●●●●●●●●●●●●●●●●●●●●●●●●●●●●●●●●●●●●●●●●●●●●●●●●●●●●●●●●●●●●●●●●●●●●●●●●●●●●●●●●●●●●●●●●●●●●●●●●●●●●●●●●●●●●●●●●●●●●●●●●●●●●●●●●●●●●●●●●●●●●●●●●●●●●●●●●●●●●●●●●●●●●●●●● |      |      |      |      |      |      |      |  |

| conservation                         | 1300                                                                          | 1310                                                         | 1320                                                      | 1330                            | 1340 | 1350 | 1360 | 1370 |  |
|--------------------------------------|-------------------------------------------------------------------------------|--------------------------------------------------------------|-----------------------------------------------------------|---------------------------------|------|------|------|------|--|
| <i>Callorhinchus milii</i>           | CTGCTGCAAA                                                                    | CAGTCTCAGAC                                                  | GGACACGAGGCTGAAATCAATTATCTTCTGAAAGATGGCTCTAGAAAAAATTGCCTT | CCT                             | 1373 |      |      |      |  |
| <i>Alligator mississippiensis</i>    | CTCCTTGACCAGGTGCTCCAGGATACAGGAAATGACATCAATTATCTGCTAAAAATGGCCCTGGAGAAGATTGCCTT | CCT                                                          | 1358                                                      |                                 |      |      |      |      |  |
| <i>Anolis carolinensis</i>           | TTGCTCAGTGAAGTCACTGAA                                                         | GATAAAGAGAGTGATATCAATTACCTGTTGAAAAATGGCCCTGCAAAAGATTGCATTTAT | 1430                                                      |                                 |      |      |      |      |  |
| <i>Astyanax mexicanus</i>            | CTTCTGGACACTCTGCTAAT                                                          | GATAATGAGACAGACATCAATTACCTATTGAAAAATGGCTTTGGAGAAGATAGCTTT    | CCT                                                       | 1355                            |      |      |      |      |  |
| <i>Boleophthalmus pectinirostris</i> | CTGCTGGGCTCCAGTG                                                              | CATCTGACACAGAAACCGACATTA                                     | AACTATTGTTGAAAGATGGCTTTGGAGAAAAATAGCTTT                   | CCT                             | 1373 |      |      |      |  |
| <i>Cynoglossus semilaevis</i>        | CTGCTAGATGATCCCTCTTCCA                                                        | ATAATGAAACTGACCTGA                                           | AACTACCTGTTAAAGATGGCTTTGGAGAAGATCGCTT                     | CCT                             | 1376 |      |      |      |  |
| <i>Danio rerio</i>                   | CTCCTGGACCAACTAAC                                                             | CGATGACGCTGAGAGTGACATCAATTACCTGTTGAAGATGGCCTTGGAAAAAGATCGCTT | CCT                                                       | 1478                            |      |      |      |      |  |
| <i>Esox lucius</i>                   | CTTTTGCCCAATGCGAC                                                             | CAATGATCCTGAGAGCGACATCA                                      | AACTACCTACTGAAGATGGCTCTGGAGAAGATTGCCTT                    | CCT                             | 1364 |      |      |      |  |
| <i>Fundulus heteroclitus</i>         | CTGCTGGAATCTGTGAC                                                             | CTCTGACGTTGAAACTGACCTGA                                      | AACTTCC                                                   | TGCTGAAGACTGCTCTGGATAAGATAGCCTT | CCT  | 1382 |      |      |  |
| <i>Gekko japonicus</i>               | CTGCTCGACCAGGTCACTGAG                                                         | GATGCAGACAGTGATATCA                                          | AACTATCTCCTGAAAAATGGCCCTGGAGAAGATTGCCTT                   | CCT                             | 1370 |      |      |      |  |
| <i>Haplochromis burtoni</i>          | CTTCTGGAATCTGTGAC                                                             | CATCTGACATCGAAACTGACACCA                                     | AACTACCTGCTAAAAATGGCTCTGGAGAAGATAGCCTT                    | CCT                             | 1373 |      |      |      |  |
| <i>Hippocampus comes</i>             | CTGCTGAAGTCGGCGAGTCC                                                          | GACCTGAATCCGACATCA                                           | AACTACCTGTTAAAGATGGCACTGGAGAAGATAGCCTT                    | CCT                             | 1358 |      |      |      |  |
| <i>Ictalurus punctatus</i>           | CTGTTGGACACACTA                                                               | AACTGACACTGAAACTGACACAA                                      | ATTACCTGTTAAAGATGGCTTTAGAGAAGATAGCCTT                     | CCT                             | 1364 |      |      |      |  |
| <i>Larimichthys crocea</i>           | CTGCTGGAATCTGCGAC                                                             | CATCTGATATTCAAACTGATACCA                                     | AACTACCTGTTAAAGATGGCTTTGGAGAAGATAGCCTT                    | CCT                             | 1367 |      |      |      |  |
| <i>Lates calcarifer</i>              | CTACTGGAATCTGTGAC                                                             | CTCTGATGCTGAAACCGATATCA                                      | AACTACCTGTTGAAGATGGCTCTGGAGAAGATTGCCTT                    | CTT                             | 1370 |      |      |      |  |
| <i>Latimeria chalumnae</i>           | TTACTGTCACAGTTCACTAAT                                                         | GATACGGAAAGTGACATCA                                          | AACTATCTTCTGAAGATGGCTCTTGAGAAAAATAGCCTT                   | CCT                             | 1352 |      |      |      |  |
| <i>Lepisosteus oculatus</i>          | CTACTGAAATCCTTTGTCCCG                                                         | GACAATGAAAGTGACATTA                                          | AACTACCTGCTGAAAAATGGCCCTGGAGAAGATTGCCTT                   | CCT                             | 1358 |      |      |      |  |
| <i>Macaca fascicularis</i>           | CTGCTGGACCGTGTCACCAAT                                                         | GACACGGAAAGTGACATCA                                          | AACTACTGCTAAAGATGGCACTGGAAAAAATGCCTT                      | CCT                             | 1397 |      |      |      |  |
| <i>Manacus vitellinus</i>            | CTCCTCAGCAATGCCACTGAG                                                         | GATGAAGAGAGCAACATCA                                          | AACTACCTGCTGAAGATGGCCCTGGAGAAGATTGCCTT                    | CCT                             | 1349 |      |      |      |  |
| <i>Mus musculus</i>                  | CTACTGGACCATGTTACCAAT                                                         | GACATAGAGAGTGACATCA                                          | AACTACCTGCTAAAGATGGCCCTAGAGAAAAATCGCTT                    | CTT                             | 1409 |      |      |      |  |
| <i>Neolamprologus brichardi</i>      | CTTCTGGAATCTGTGAC                                                             | CATCTGACATCGAAACTGACACCA                                     | AACTACCTGTTAAAAATGGCTCTGGAGAAGATAGCCTT                    | CCT                             | 1373 |      |      |      |  |
| <i>Oncorhynchus mykiss</i>           | CTATTGTCTAACGCGACCAAT                                                         | GACAACGAGAGTGACATCA                                          | AACTACCTGCTGAAGATGGCTCTGGACAAGATGGCCTT                    | CCT                             | 1364 |      |      |      |  |
| <i>Oreochromis niloticus</i>         | CTTCTGGAATCTGTGAC                                                             | CATCTGACATCGAAACTGACACCA                                     | AACTACCTGCTAAAAATGGCTCTGGAGAAGATAGCCTT                    | CCT                             | 1373 |      |      |      |  |
| <i>Poecilia formosa</i>              | CTTCTAGAGTCTGTGGCCACT                                                         | GACACAGAAACTGATCTGA                                          | AACTTCC                                                   | TGTTGAAGACTGCTCTGGAGAAGATAGCCTT | CCT  | 1379 |      |      |  |
| <i>Poecilia latipinna</i>            | CTTCTAGAGTCTGTGGCCACC                                                         | GACACAGAAACTGATCTGA                                          | AACTTCC                                                   | TGTTGAAGACCGCTCTGGAGAAGATAGCCTT | CCT  | 1379 |      |      |  |
| <i>Pseudopodoces humilis</i>         | CTCCTCAGCAGTGCTGCTGAG                                                         | GATGAAGAGAGCAATATCA                                          | AACTACC                                                   | TGCTGAAGATGGCCCTGGAGAAGATTGCCTT | CCT  | 1349 |      |      |  |
| <i>Pundamilia nyererei</i>           | CTTCTGGAATCTGTGAC                                                             | CATCTGACATCGAAACTGACACCA                                     | AACTACCTGCTAAAAATGGCTCTGGAGAAGATAGCCTT                    | CCT                             | 1373 |      |      |      |  |
| <i>Pygocentrus nattereri</i>         | CTTCTGGAGACGCTGAC                                                             | CTGATGATAATGAGACCGACATCA                                     | AACTACTATTAAAGATGGCTTTGGAGAAGATAGCGTT                     | CCT                             | 1346 |      |      |      |  |
| <i>Python bivittatus</i>             | CTGCTCACCATGCCAGTGAA                                                          | GATAAAGAGAGTGACATCA                                          | AACTATCTTCTGAAAAATGGCCCTGGAAAAGATTGCCTT                   | CCT                             | 1361 |      |      |      |  |
| <i>Rattus norvegicus</i>             | CTGCTAGACCGTGTTGCAAT                                                          | GACATAGAAAGTGACATCA                                          | AACTACTGCTAAAGATGGCCCTAGAGAAAAATGCCTT                     | CTT                             | 1412 |      |      |      |  |
| <i>Scleropages formosus</i>          | CTGCTGGAGAACCTGTTGAA                                                          | GATCATGAGAGTGATCTTA                                          | AACTACCTATTGAAGATGGCTCTGGAGAAGATAGCCTT                    | CCT                             | 1358 |      |      |      |  |
| <i>Sinocyclocheilus anshuiensis</i>  | ATCCTGGAACAACGGA                                                              | CGATGATGCTGAGAGTGACATCA                                      | AACTACCTGTTGAAGATGGCTTTGGAAAAGATCGCTT                     | CCT                             | 1349 |      |      |      |  |
| <i>Xenopus tropicalis</i>            | CTTCTTGAAACTGTCACTAAT                                                         | GATAAAGAAAGTGATATCA                                          | AACTATCTGTTGAAAAATGGCTCTGGAGAAAAATGCCTT                   | CCT                             | 1358 |      |      |      |  |
| <i>Lipotes vexillifer</i>            | CTGCTGGACCATGTCA                                                              | CCAACGACACGGAAACCGACATCA                                     | AACTACTGTTAAAGATGGCACTGGAAAAAATGCCTT                      | CCT                             | 1418 |      |      |      |  |
| <i>Orcinus orca</i>                  | CTGCTGGACCATGTCA                                                              | CCAACGACAAGGAAAGCGACATCA                                     | AACTACTGTTAAAGATGGCACTGGAAAAAATGCCTT                      | CCT                             | 1403 |      |      |      |  |
| <i>Homo sapiens</i>                  | CTGCTGGACCGTGTCACCAAT                                                         | GACACGGAAAGTGACATCA                                          | AACTACTGCTAAAAATGGCACTGGAAAAAATGCCTT                      | CCT                             | 1394 |      |      |      |  |

| conservation                         | 1380                                         | 1390             | 1400            | 1410      | 1420 | 1430 | 1440 | 1450 |  |
|--------------------------------------|----------------------------------------------|------------------|-----------------|-----------|------|------|------|------|--|
| <i>Callorhinchus milii</i>           | TCCCTTTTGGCTATTGATAGACCAGTGGAGGTGGGGAGTGTTT  | CAGTGGACGCATCTCT | CAATTGCATTACA   | ACTACGAAT | 1453 |      |      |      |  |
| <i>Alligator mississippiensis</i>    | GCCTTTTGGGTACCTTATTGACCAGTGGCGCTGGAACGTCTT   | CAGTGGGCACACCTC  | ACCAACCGCTACA   | ACTACGACT | 1438 |      |      |      |  |
| <i>Anolis carolinensis</i>           | TCCCTTTTGGCTACCTCATAGACCAGTGGCGATGGAACGTTTT  | CAGTGGCCGCACCACT | CCAGCCGCTACA    | ATTATGACT | 1510 |      |      |      |  |
| <i>Astyanax mexicanus</i>            | TCCGTTTGGATACCTCATTGATCAGTGGCGTTGGGGTGTGTT   | CAGTGGACGTACGCC  | ACCTGAGAGATACA  | ATGCAGAGT | 1435 |      |      |      |  |
| <i>Boleophthalmus pectinirostris</i> | TCCCTTTTGGATACCTCATTGACCAGTGGAGATGGAACGTTTT  | CAGTGGAGATACAGC  | AGCAGATCGTTACA  | ACTATGACT | 1453 |      |      |      |  |
| <i>Cynoglossus semilaevis</i>        | TCCTTTTGGTTACCTCATTGACCAGTGGAGGTGGGGTGTGTT   | CAGTGGACAACTCCT  | CCAGAGAAATACA   | ACTCAGAAT | 1456 |      |      |      |  |
| <i>Danio rerio</i>                   | TCCTTTTGGGTACCTTATTGACCAGTGGCGATGGAGTGTGTT   | CAGTGGAGAGACACCG | CTGACCGCTACA    | ATGCAGATT | 1558 |      |      |      |  |
| <i>Esox lucius</i>                   | TCCCTTTTGGCTATCTTATAGACCAATGGCGATGGAACGTGTTT | AGCGGTCACACTC    | ACAGAGCGCTACA   | ATGCAGACT | 1444 |      |      |      |  |
| <i>Fundulus heteroclitus</i>         | CCCCTTCGGCTACCTCATTGACCTCTGGAGATGGGGCGTGTTT  | AGTGAAGCACCCCT   | CCGGAGAAGTACA   | ACTCGGACT | 1462 |      |      |      |  |
| <i>Gekko japonicus</i>               | TCCCTTTTGGCTACCTGATAGATCAGTGGCGATGGAACGTCTT  | CAGTGGGCGCACCCCT | CCAACCGTTACA    | ATTACGACT | 1450 |      |      |      |  |
| <i>Haplochromis burtoni</i>          | TCCCTTTTGGCTACCTTATTGACCTCTGGAGATGGGATGTCTT  | AGTGGAAAGACCCCT  | CCGGAGCGTTACA   | ATGCTGACT | 1453 |      |      |      |  |
| <i>Hippocampus comes</i>             | TCCTTTTGGCTACCTGATCGACCAATGGAGATGGGGCGTATTT  | GGGGCAACATCCC    | CCGGAGCGATACA   | ACGCAGAAT | 1438 |      |      |      |  |
| <i>Ictalurus punctatus</i>           | TCCTTTTGGATACCTCATTGATCAGTGGCGCTGGGGTGTGTT   | CAGTGGACATACACCA | CTGAACGCTACA    | ACTCAGAGT | 1444 |      |      |      |  |
| <i>Larimichthys crocea</i>           | TCCCTTTTGGTTACCTCATCGACCAGTGGAGATGGAGTGTGTT  | CAGTGGACGCACACCT | CCAGAGCGGTACA   | ATGCTGACT | 1447 |      |      |      |  |
| <i>Lates calcarifer</i>              | GCCCTTTTGGCTATCTCATTGACCAGTGGAGATGGGGCGTCTT  | CAGTGAAGCACCT    | CTAAGGAGCGGTACA | ACTCTGACT | 1450 |      |      |      |  |
| <i>Latimeria chalumnae</i>           | ACCTTTTGGTTACCTGATTGACCAATGGCGTTGGGGGTGTTT   | AGTGGACGCATCAC   | CCCTCAAGACTACA  | ATTATGAGT | 1432 |      |      |      |  |
| <i>Lepisosteus oculatus</i>          | GCCCTTCGGATACCTCATCGACCAGTGGAGGTGGGGGTGTTT   | AGCGGACGCACCCCA  | CCCTGAGCGCTACA  | ATGCAGACT | 1438 |      |      |      |  |
| <i>Macaca fascicularis</i>           | GCCCTTTTGGCTACCTTGGTGGACCAGTGGCGCTGGGGGTCTT  | AATGGGCGTACTCT   | CTTCCCCTACA     | ACTTCGACT | 1477 |      |      |      |  |
| <i>Manacus vitellinus</i>            | ACCCTTTGGCTACCTCATCGACCAGTGGCGCTGGAACGTGTT   | CAGTGGCCGCACGCC  | CCGAGCCGCTACA   | ACTCCGACT | 1429 |      |      |      |  |
| <i>Mus musculus</i>                  | GCCCTTTTGGCTACCTGGTGGACCAGTGGCGTTGGGGGTCTT   | CAGTGGACGGACCCCA | CCCTCTCGCTACA   | ACTTCGACT | 1489 |      |      |      |  |
| <i>Neolamprologus brichardi</i>      | TCCCTTTTGGCTACCTTATTGACCTCTGGAGATGGGATGTCTT  | AGTGGAAAGACCCCT  | CAGGAGCGTTACA   | ATGCTGACT | 1453 |      |      |      |  |
| <i>Oncorhynchus mykiss</i>           | TCCCTTTTGGCTATCTCATTGACCAGTGGAGATGGAGTGTGTT  | AGTGGGCGCACCCCC  | CCAGAGCGATACA   | ACGCAGACT | 1444 |      |      |      |  |
| <i>Oreochromis niloticus</i>         | TCCTTTTGGCTACCTTATCGACCTCTGGAGATGGGATGTGTT   | AGTGGAAAGACCCCT  | CCGGAGCGTTACA   | ATGCTGACT | 1453 |      |      |      |  |
| <i>Poecilia formosa</i>              | TCCCTTTTGGCTACCTCATTGACCTCTGGAGATGGGGCGTGTT  | AGTGGAAAGCATTCT  | CCAGAGAAGTACA   | ACTCGGAAT | 1459 |      |      |      |  |
| <i>Poecilia latipinna</i>            | TCCCTTTTGGCTACCTCATTGACCTCTGGAGATGGGGCGTGTT  | AGTGGAAAGCATTCT  | CCAGAGAAGTACA   | ACTCAGAAT | 1459 |      |      |      |  |
| <i>Pseudopodoces humilis</i>         | GCCCTTTTGGCTACCTCATCGACCAGTGGCGCTGGAATGTGTT  | CAGTGGCCACACGCC  | CCAAGCCGTTACA   | ACTACGACT | 1429 |      |      |      |  |
| <i>Pundamilia nyererei</i>           | TCCCTTTTGGCTACCTTATTGACCTCTGGAGATGGGATGTCTT  | AGTGGAAAGACCCCT  | CCGGAGCGTTACA   | ATGCTGACT | 1453 |      |      |      |  |
| <i>Pygocentrus nattereri</i>         | TCCTTTTGGATACCTCATTGATCAGTGGCGCTGGGGTGTGTT   | CAGTGGATATACACCG | CTGAACGCTACA    | ATGCAGAGT | 1426 |      |      |      |  |
| <i>Python bivittatus</i>             | ACCCTTTTGGCTACCTAATAGACCAGTGGCGGTGGAATGTCTT  | CAGTGGGCACACCCCT | CCAAGCCGTTACA   | ATTATGATT | 1441 |      |      |      |  |
| <i>Rattus norvegicus</i>             | GCCCTTTTGGTTACCTTGGTGGACCAGTGGCGCTGGGGGTCTT  | CAGTGGACGTACCCA  | CCCTCTCGCTACA   | ACTACGACT | 1492 |      |      |      |  |
| <i>Scleropages formosus</i>          | GCCTTTTGGGTTCTCATTGACCAGTGGAGATGGGGAGTATT    | CAGTGGCAAGACCC   | CCCTGAGCGCTACA  | ATGCAGATT | 1438 |      |      |      |  |
| <i>Sinocyclocheilus anshuiensis</i>  | TCCTTTTGGATATCTTATTGATCAGTGGCGCTGGGGTGTGTT   | AGTGGACGAACACCG  | CCAGAACGTTACA   | ATGCAGAAT | 1429 |      |      |      |  |
| <i>Xenopus tropicalis</i>            | GCCATTTTGGCTTCTGATTGATCAGTGGAGATGGAATGTCTT   | CAGTGGCCGCACACCT | CCCACCATACA     | ACTACGACT | 1438 |      |      |      |  |
| <i>Lipotes vexillifer</i>            | GCCCTTTTGGCTACTTGGTGGACCAGTGGCGTTGGGGGTCTT   | AGTGGGCGTACCC    | CCCTTCCCTCTACA  | ACTATGACT | 1498 |      |      |      |  |
| <i>Orcinus orca</i>                  | GCCCTTTTGGCTACTTGGTGGACCAGTGGCGTTGGGGGTCTT   | AGTGGGCGTACCC    | CCCTTCCCTCTACA  | ACTATGACT | 1483 |      |      |      |  |
| <i>Homo sapiens</i>                  | GCCCTTTTGGCTACTTGGTGGACCAGTGGCGTTGGGGGTCTT   | AGTGGGCGTACCC    | CCCTTCCCGCTACA  | ACTTCGACT | 1474 |      |      |      |  |



|              | 1460                                                                                                                                                                                                                                                                                                                                                                                                                                                                                                                                                                                                                                                                                                                                                                                                                                                                                                                                                                                                                                                                                                                                                                                                                                                                                                                                                                                                                                                                                                                                                                                                                                                                                                                                                                                                                                                                                                                                                                                                                                                                                                                                                                                                                                                                                                                                                                                                                                                                                                                                                                                                                                                                                                                                                                                                                                                                                                                                                                                                                                                                                                                                                                                                                                                                                                                                                                                                                                                                                                                                                                                                                                                                                                                                                                                                                                                                                                                                                                                                                                                                                                                                                                                                                                                                                                                                                                                                                                                                                                                                                                                                                                                                                                                                                                                                                                                                                                                                                                                                                                                                                                                                                                                                                                                                                                                                                                                                                                                                                                                                                                                                                                                                                                                                                                                                                                                                                                                                                                                                                                                                                                                                                                                                                                                                                                                                                                                                                                                                                                                                                                                                                                                                                                                                                                                                                                                                                                                                                                                                                                                                                                                                                                                                                                                                                                                                                                                                                                                                                                                                                                                                                                                                                                                                                                                                                                                                                                                                                                                                                                                                                                                                                                                                                                                                                                                                                                                                                                                                                                                                                                                                                                                                                                                                                                                                                                                                                                                                                                                                                                                                                                                                                                                                                                                                                                                                                                                                                                                                                                                                                                                                                                                                                                                                                                                                                                                                                                                                                                                                                                                                                                                                                                                                                                                                                                                                                                                                                                                                                                                                                                                                                                                                                                                                                                                                                                                                                                                                                                                                                                                                                                                                                                                                                                                                                                                                                                                                                                                                                                                                                                                                                                                                                                                                                                                                                                                                                                                                                                                                                                                                                                                                                                                                                                                                                                                                                                                                                                                                                                                                                                                                                                                                                                                                                                                            | 1470 | 1480 | 1490 | 1500 | 1510 | 1520 | 1530 |  |
|--------------|-------------------------------------------------------------------------------------------------------------------------------------------------------------------------------------------------------------------------------------------------------------------------------------------------------------------------------------------------------------------------------------------------------------------------------------------------------------------------------------------------------------------------------------------------------------------------------------------------------------------------------------------------------------------------------------------------------------------------------------------------------------------------------------------------------------------------------------------------------------------------------------------------------------------------------------------------------------------------------------------------------------------------------------------------------------------------------------------------------------------------------------------------------------------------------------------------------------------------------------------------------------------------------------------------------------------------------------------------------------------------------------------------------------------------------------------------------------------------------------------------------------------------------------------------------------------------------------------------------------------------------------------------------------------------------------------------------------------------------------------------------------------------------------------------------------------------------------------------------------------------------------------------------------------------------------------------------------------------------------------------------------------------------------------------------------------------------------------------------------------------------------------------------------------------------------------------------------------------------------------------------------------------------------------------------------------------------------------------------------------------------------------------------------------------------------------------------------------------------------------------------------------------------------------------------------------------------------------------------------------------------------------------------------------------------------------------------------------------------------------------------------------------------------------------------------------------------------------------------------------------------------------------------------------------------------------------------------------------------------------------------------------------------------------------------------------------------------------------------------------------------------------------------------------------------------------------------------------------------------------------------------------------------------------------------------------------------------------------------------------------------------------------------------------------------------------------------------------------------------------------------------------------------------------------------------------------------------------------------------------------------------------------------------------------------------------------------------------------------------------------------------------------------------------------------------------------------------------------------------------------------------------------------------------------------------------------------------------------------------------------------------------------------------------------------------------------------------------------------------------------------------------------------------------------------------------------------------------------------------------------------------------------------------------------------------------------------------------------------------------------------------------------------------------------------------------------------------------------------------------------------------------------------------------------------------------------------------------------------------------------------------------------------------------------------------------------------------------------------------------------------------------------------------------------------------------------------------------------------------------------------------------------------------------------------------------------------------------------------------------------------------------------------------------------------------------------------------------------------------------------------------------------------------------------------------------------------------------------------------------------------------------------------------------------------------------------------------------------------------------------------------------------------------------------------------------------------------------------------------------------------------------------------------------------------------------------------------------------------------------------------------------------------------------------------------------------------------------------------------------------------------------------------------------------------------------------------------------------------------------------------------------------------------------------------------------------------------------------------------------------------------------------------------------------------------------------------------------------------------------------------------------------------------------------------------------------------------------------------------------------------------------------------------------------------------------------------------------------------------------------------------------------------------------------------------------------------------------------------------------------------------------------------------------------------------------------------------------------------------------------------------------------------------------------------------------------------------------------------------------------------------------------------------------------------------------------------------------------------------------------------------------------------------------------------------------------------------------------------------------------------------------------------------------------------------------------------------------------------------------------------------------------------------------------------------------------------------------------------------------------------------------------------------------------------------------------------------------------------------------------------------------------------------------------------------------------------------------------------------------------------------------------------------------------------------------------------------------------------------------------------------------------------------------------------------------------------------------------------------------------------------------------------------------------------------------------------------------------------------------------------------------------------------------------------------------------------------------------------------------------------------------------------------------------------------------------------------------------------------------------------------------------------------------------------------------------------------------------------------------------------------------------------------------------------------------------------------------------------------------------------------------------------------------------------------------------------------------------------------------------------------------------------------------------------------------------------------------------------------------------------------------------------------------------------------------------------------------------------------------------------------------------------------------------------------------------------------------------------------------------------------------------------------------------------------------------------------------------------------------------------------------------------------------------------------------------------------------------------------------------------------------------------------------------------------------------------------------------------------------------------------------------------------------------------------------------------------------------------------------------------------------------------------------------------------------------------------------------------------------------------------------------------------------------------------------------------------------------------------------------------------------------------------------------------------------------------------------------------------------------------------------------------------------------------------------------------------------------------------------------------------------------------------------------------------------------------------------------------------------------------------------------------------------------------------------------------------------------------------------------------------------------------------------------------------------------------------------------------------------------------------------------------------------------------------------------------------------------------------------------------------------------------------------------------------------------------------------------------------------------------------------------------------------------------------------------------------------------------------------------------------------------------------------------------------------------------------------------------------------------------------------------------------------------------------------------------------------------------------------------------------------------------------------------------------------------------------------------------------------------------------------------------------------------------------------------------------------------------------------------------------------------------------------------------------------------------------------------------------------------------------------------------------------------------------------------------------------------------------------------------------------------------------------------------------------------------------------------------------------------------------------------------------------------------------------------------------------------------------------------------------------------------------------------------------------------------------------------------------------------------------------------------------------------------------------------------------------------------------------------------------------------------------------------------------------------------------------------------------------------------------------------------------------------------------------------------------------------------------------------------------------------------------------------------------------------------------------------------------------------------------------------------------------------------------------------------------------------------------------------------------------------------------------------------------------------------------------------------------------------------------------------------------------------------------------------------------------------------------------------------------------------------------------------------------------------------------------------------------------------------------------------------------------------|------|------|------|------|------|------|------|--|
| conservation | ●●●●●●●●●●●●●●●●●●●●●●●●●●●●●●●●●●●●●●●●●●●●●●●●●●●●●●●●●●●●●●●●●●●●●●●●●●●●●●●●●●●●●●●●●●●●●●●●●●●●●●●●●●●●●●●●●●●●●●●●●●●●●●●●●●●●●●●●●●●●●●●●●●●●●●●●●●●●●●●●●●●●●●●●●●●●●●●●●●●●●●●●●●●●●●●●●●●●●●●●●●●●●●●●●●●●●●●●●●●●●●●●●●●●●●●●●●●●●●●●●●●●●●●●●●●●●●●●●●●●●●●●●●●●●●●●●●●●●●●●●●●●●●●●●●●●●●●●●●●●●●●●●●●●●●●●●●●●●●●●●●●●●●●●●●●●●●●●●●●●●●●●●●●●●●●●●●●●●●●●●●●●●●●●●●●●●●●●●●●●●●●●●●●●●●●●●●●●●●●●●●●●●●●●●●●●●●●●●●●●●●●●●●●●●●●●●●●●●●●●●●●●●●●●●●●●●●●●●●●●●●●●●●●●●●●●●●●●●●●●●●●●●●●●●●●●●●●●●●●●●●●●●●●●●●●●●●●●●●●●●●●●●●●●●●●●●●●●●●●●●●●●●●●●●●●●●●●●●●●●●●●●●●●●●●●●●●●●●●●●●●●●●●●●●●●●●●●●●●●●●●●●●●●●●●●●●●●●●●●●●●●●●●●●●●●●●●●●●●●●●●●●●●●●●●●●●●●●●●●●●●●●●●●●●●●●●●●●●●●●●●●●●●●●●●●●●●●●●●●●●●●●●●●●●●●●●●●●●●●●●●●●●●●●●●●●●●●●●●●●●●●●●●●●●●●●●●●●●●●●●●●●●●●●●●●●●●●●●●●●●●●●●●●●●●●●●●●●●●●●●●●●●●●●●●●●●●●●●●●●●●●●●●●●●●●●●●●●●●●●●●●●●●●●●●●●●●●●●●●●●●●●●●●●●●●●●●●●●●●●●●●●●●●●●●●●●●●●●●●●●●●●●●●●●●●●●●●●●●●●●●●●●●●●●●●●●●●●●●●●●●●●●●●●●●●●●●●●●●●●●●●●●●●●●●●●●●●●●●●●●●●●●●●●●●●●●●●●●●●●●●●●●●●●●●●●●●●●●●●●●●●●●●●●●●●●●●●●●●●●●●●●●●●●●●●●●●●●●●●●●●●●●●●●●●●●●●●●●●●●●●●●●●●●●●●●●●●●●●●●●●●●●●●●●●●●●●●●●●●●●●●●●●●●●●●●●●●●●●●●●●●●●●●●●●●●●●●●●●●●●●●●●●●●●●●●●●●●●●●●●●●●●●●●●●●●●●●●●●●●●●●●●●●●●●●●●●●●●●●●●●●●●●●●●●●●●●●●●●●●●●●●●●●●●●●●●●●●●●●●●●●●●●●●●●●●●●●●●●●●●●●●●●●●●●●●●●●●●●●●●●●●●●●●●●●●●●●●●●●●●●●●●●●●●●●●●●●●●●●●●●●●●●●●●●●●●●●●●●●●●●●●●●●●●●●●●●●●●●●●●●●●●●●●●●●●●●●●●●●●●●●●●●●●●●●●●●●●●●●●●●●●●●●●●●●●●●●●●●●●●●●●●●●●●●●●●●●●●●●●●●●●●●●●●●●●●●●●●●●●●●●●●●●●●●●●●●●●●●●●●●●●●●●●●●●●●●●●●●●●●●●●●●●●●●●●●●●●●●●●●●●●●●●●●●●●●●●●●●●●●●●●●●●●●●●●●●●●●●●●●●●●●●●●●●●●●●●●●●●●●●●●●●●●●●●●●●●●●●●●●●●●●●●●●●●●●●●●●●●●●●●●●●●●●●●●●●●●●●●●●●●●●●●●●●●●●●●●●●●●●●●●●●●●●●●●●●●●●●●●●●●●●●●●●●●●●●●●●●●●●●●●●●●●●●●●●●●●●●●●●●●●●●●●●●●●●●●●●●●●●●●●●●●●●●●●●●●●●●●●●●●●●●●●●●●●●●●●●●●●●●●●●●●●●●●●●●●●●●●●●●●●●●●●●●●●●●●●●●●●●●●●●●●●●●●●●●●●●●●●●●●●●●●●●●●●●●●●●●●●●●●●●●●●●●●●●●●●●●●●●●●●●●●●●●●●●●●●●●●●●●●●●●●●●●●●●●●●●●●●●●●●●●●●●●●●●●●●●●●●●●●●●●●●●●●●●●●●●●●●●●●●●●●●●●●●●●●●●●●●●●●●●●●●●●●●●●●●●●●●●●●●●●●●●●●●●●●●●●●●●●●●●●●●●●●●●●●●●●●●●●●●●●●●●●●●●●●●●●●●●●●●●●●●●●●●●●●●●●●●●●●●●●●●●●●●●●●●●●●●●●●●●●●●●●●●●●●●●●●●●●●●●●●●●●●●●●●●●●●●●●●●●●●●●●●●●●●●●●●●●●●●●●●●●●●●●●●●●●●●●●●●●●●●●●●●●●●●●●●●●●●●●●●●●●●●●●●●●●●●●●●●●●●●●●●●●●●●●●●●●●●●●●●●●●●●●●●●●●●●●●●●●●●●●●●●●●●●●●●●●●●●●●●●●●●●●●●●●●●●●●●●●●●●●●●●●●●●●●●●●●●●●●●●●●●●●●●●●●●●●●●●●●●●●●●●●●●●●●●●●●●●●●●●●●●●●●●●●●●●●●●●●●●●●●●●●●●●●●●●●●●●●●●●●●●●●●●●●●●●●●●●●●●●●●●●●●●●●●●●●●●●●●●●●●●●●●●●●●●●●●●●●●●●●●●●●●●●●●●●●●●●●●●●●●●●●●●●●●●●●●●●●●●●●●●●●●●●●●●●●●●●●●●●●●●●●●●●●●●●●●●●●●●●●●●●●●●●●●●●●●●●●●●●●●●●●●●●●●●●●●●●●●●●●●●●●●●●●●●●●●●●●●●●●●●●●●●●●●●●●●●●●●●●●●●●●●●●●●●●●●●●●●●●●●●●●●●●●●●●●●●●●●●●●●●●●●●●●●●●●●●●●●●●●●●●●●●●●●●●●●●●●●●●●●●●●●●●●●●●●●●●●●●●●●●●●●●●●●●●●●●●●●●●●●●●●●●●●●●●●●●●●●●●●●●●●●●●●●●●●●●●●●●●●●●●●●●●●●●●●●●●●●●●●●●●●●●●●●●●●●●●●●●●●●●●●●●●●●●●●●●●●●●●●●●●●●●●●●●●●●●●●●●●●●●●●●●●●●●●●●●●●●●●●●●●●●●●●●●●●●●●●●●●●●●●●●●●●●●●●●●●●●●●●●●●●●●●●●●●●●●●●●●●●●●●●●●●●●●●●●●●●●●●●●●●●●●●●●●●●●●●●●●●●●●●●●●●●●●●●●●●●●●●●●●●●●●●●●●●●●●●●●●●●●●●●●●●●●●●●●●●●●●●●●●●●●●●●●●●●●●●●●●●●●●●●●●●●●●●●●●●●●●●●●●●●●●●●●●●●●●●●●●●●●●●●●●●●●●●●●●●●●●●●●●●●●●●●●●●●●●●●●●●●●●●●●●●●●●●●●●●●●●●●●●●●●●●●●●●●●●●●●●●●●●●●●●●●●●●●●●●●●●●●●●●●●●●●●●●●●●●●●●●●●●●●●●●●●●●●●●●●●●●●●●●●●●●●●●●●●●●●●●●●●●●●●●●●●●●●●●●●●●●●●●●●●●●●●●●●●●●●●●●●●●●●●●●●●●●●●●●●●●●●●●●●●●●●●●●●●●●●●●●●●●●●●●●●●●●●●●●●●●●●●●●●●●●●●●●●●●●●●●●●●●●●●●●●●●●●●●●●●●●●●●●●●●●●●●●●●●●●●●●●●●●●●●●●●●●●●●●●●●●●●●●●●●●●●●●●●●●●●●●●●●●●●●●●●●●●●●●●●●●●●●●●●●●●●●●●●●●●●●●●●●●●●●●●●●●●●●●●●●●●●●●●●●●●●●●●●●●●●●●●●●●●●●●●●●●●●●●●●●●●●●●●●●●●●●●●●●●●●●●●●●●●●●●●●●●●●●●●●●●●●●●●●●●●●●●●●●●●●●●●●●●●●●●●●●●●●●●●●●●●●●●●●●●●●●●●●●●●●●●●●●●●●●●●●●●●●●●●●●●●●●●●●●●●●●●●●●●●●●●●●●●●●●●●●●●●●●●●●●●●●●●●●●●●●●●●●●●●●●●●●●●●●●●●●●●●●●●●●●●●●●●●●●●●●●●●●●●●●●●●●●●●●●●●●●●●●●●●●●●●●●●●●●●●●●●●●●●●●●●●●●●●●●●●●●●●●●●●●●●●●●●●●●●●●●●●●●●●●●●●●●●●●●●●●●●●●●●●●●●●●●●●●●●●●●●●●●●●●●●●●●●●●●●●●●●●●●●●●●●●●●●●●●●●●●●●●●●●●●●●●●●●●●●●●●●●●●●●●●●●●●●●●●●●●●●●●●●●●●●●●●●●●●●●●●●●●●●●●●●●●●●●●●●●●●●●●●●●●●●●●●●●●●●●●●●●●●●●●●●●●●●●●●●●●●●●●●●●●●●●●●●●●●●●●●●●●●●●●●●●●●●●●●●●●●●●●●●●●●●●●●●●●●●●●●●●●●●●●●●●●●●●●●●●●●●●●●●●●●●●●●●●●●●●●●●●●●●●●●●●●●●●●●●●●●●●●●●●●●●●●●●●●●●●●●●●●●●●●●●●●●●●●●●●●●●●●●●●●●●●●●●●●●●●●●●●●●●●●●●●●●●●●●●●●●●●●●●●●●●●●●●●●●●●●●●●●●●●●●●●●●●●●●●●●●●●●●●●●●●●●●●●●●●●●●●●●●●●●●●●●●●●●●●●●●●●●●●●●●●●●●●●●●●●●●●●●●●●●●●●●●●●●●●●●●●●●●●●●●●●●●●●●●●●●●●●●●●●●●●●●●●●●●●●●●●●●●●●●●●●●●●●●●●●●●●●●●●●●●●●●●●●●●●●●●●●●●●●●●●●●●●●●●●●●●●●●●●●●●●●●●●●●●●●●●●●●●●●●●●●●●●●●●●●●●●●●●●●●●●●●●●●●●●●●●●●●●●●●●●●●●●●●●●●●●●●●●●●●●●●●●●●●●●●●●●●●●●●●●●●●●●●●●●●●●●●●●●●●●●●●●●●●●●●●●●●●●●●●●●●●●●●●●●●●●●●●●●●●●●●●●●●●●●●●●●●●●●●●●●●●●●●●●●●●●●●●●●●●●●●●●●●●●●●●●●●●●●●●●●●●●●●●●●●●●●●●●●●●●●●●●●●●●●●●●●●●●●●●●●●●●●●●●●●●●●●●●●●●●●●●●●●●●●●●●●●●●●●●●●●●●●●●●●●●●●●●●●●●●●●●●●●●●●●●●●●●●●●●●●●●●●●●●●●●●●●●●●●●●●●●●●●●●●●●●●●●●●●●●●●●●●●●●●●●●●●●●●●●●●●●●●●●●●●●●●●●●●●●●●●●●●●●●●●●●●●●●●●●●●●●●●●●●●●●●●●●●●●●●●●●●●●●●●●●●●●●●●●●●●●●●●●●●●●●●●●●●●●●●●●●●●●●●●●●●●●●●●●●●●●●●●●●●●●●●●●●●●●●●●●●●●●●●●●●●●●●●●●●●●●●●●●●●●●●●●●●●●●●●●●●●●●●●●●●●●●●●●●●●●●●●●●●●●●●●●●●●●●●●●●●●●●●●●●●●●●●●●●●●●●●●●●●●●●●●●●●●●●●●●●●●●●●●●●●●●●●●●●●●●●●●●●●●●●●●●●●●●●●●●●●●●●●●●●●●●●●●●●●●●●●●●●●●●●●●●●●●●●●●●●●●●●●●●●●●●●●●●●●●●●●●●●●●●●●●●●●●●●●●●●●●●●●●●●●●●●●●●●●●●●●●●●●●●●●●●●●●●●●●●●●●●●●●●●●●●●●●●●●●●●●●●●●●●●●●●●●●●●●●●●●●●●●●●●●●●●●●●●●●●●●●●●●●●●●●●●●●●●●●●●●●●●●●●●●●●●●●●●●●●●●●●●●●●●●●●●●●●●●●●●●●●●●●●●●●●●●●●●●●●●●●●●●●●●●●●●●●●●●●●●●●●●●●●●●●●●●●●●●●●●●●●●●●●●●●●●●●●●●●●●●●●●●●●●●●●●●●●●●●●●●●●●●●●●●●●●●●●●●●●●●●●●●●●●●●●●●●●●●●●●●●●●●●●●●●●●●●●●●●●●●●●●●●●●●●●●●●●●●●●●●●●●●●●●●●●●●●●●●●●●●●●●●●●●●●●●●●●●●●●●●●●●●●●●●●●●●●●●●●●●●●●●●●●●●●●●●●●●●●●●●●●●●●●●●●●●●●●●●●●●●●●●●●●●●●●●●●●●●●●●●●●●●●●●●●●●●●●●●●●●●●●●●●●●●●●●●●●●●●●●●●●●●●●●●●●●●●●●●●●●●●●●●●●●●●●●●●●●●●●●●●●●●●●●●●●●●●●●●●●●●●●●●●●●●●●●●●●●●●●●●●●●●●●●●●●●●●●●●●●●●●●●●●●●●●●●●●●●●●●●●●●●●●●●●●●●●●●●●●●●●●●●●●●●●●●●●●●●●●●●●●●●●●●●●●●●●●●●●●●●●●●●●●●●●●●●●●●●●●●●●●●●●●●●●●●●●●●●●●●●●●●●●●●●●●●●●●●●●●●●●●●●●●●●●●●●●●●●●●●●●●●●●●●●●●●●●●●●●●●●●●●●●●●●●●●●●●●●●●●●●●●●●●●●●●●●●●●●●●●●●●●●●●●●●●●●●●●●●●●●●●●●●●●●●●●●●●●●●●●●●●●●●●●●●●●●●●●●●●●●●●●●●●●●●●●●●●●●●●●●●●●●●●●●●●●●●●●●●●●●●●●●●●●●●●●●●●●●●●●●●●●●●●●●●●●●●●●●●●●●●●●●●●●●●●●●●●●●●●●●●●●●●●●●●●●●●●●●●●●●●●●●●●●●●●●●●●●●●●●●●●●●●●●●●●●●●●●●●●●●●●●●●●●●●●●●●●●●●●●●●●●●●●●●●●●●●●●●●●●●●●●●●●●●●●●●●●●●●●●●●●●●●●●●●●●●●●●●●●●●●●●●●●●●●●●●●●●●●●●●●●●●●●●●●●●●●●●●●●●●●●●●●●●●●●●●●●●●●●●●●●●●●●●●●●●●●●●●●●●●●●●●●●●●●●●●●●●●●●●●●●●●●●●●●●●●●●●●●●●●●●●●●●●●●●●●●●●●●●●●●●●●●●●●●●●●●●●●●●●●●●●●●●●●●●●●●●●●●●●●●●●●●●●●●●●●●●●●●●●●●●●●●●●●●●●●●●●●●●●●●●●●●●●●●●●●●●●●●●●●●●●●●●●●●●●●●●●●●●●●●●●●●●●●●●●●●●●●●●●●●●●●●●●●●●●●●●●●●●●●●●●●●●●●●●●●●●●●●●●●●●●●●●●●●●●●●●●●●●●●●●●●●●●●●●●●●●●●●●●●●●●●●●●●●●●●●●●●●●●●●●●●●●●●●●●●●●●●●●●●●●●●●●●●●●●●●●●●●●●●●●●●●●●●●●●●●●●●●●●●●●●●●●●●●●●●●●●●●●●●●●●●●●●●●●●●●●●●●●●●●●●●●●●●●●●●●●●●●●●●●●●●●●●●●●●●●●●●●●●●●●●●●●●●●●●●●●●●●●●●●●●●●●●●●●●●●●●●●●●●●●●●●●●●●●●●●●●●●●●●●●●●●●●●●●●●●●●●●●●●●●●●●●●●●●●●●●●●●●●●●●●●●●●●●●●●●●●●●●●●●●●●●●●●●●●●●●●●●●●●●●●●●●●●●●●●●●●●●●●●●●●●●●●●●●●●●●●●●●●●●●●●●●●●●●●●●●●●●●●●●●●●●●●●●●●●●●●●●●●●●●●●●●●●●●●●●●●●●●●●●●●●●●●●●●●●●●●●●●●●●●●●●●●●●●●●●●●●●●●●●●●●●●●●●●●●●●●●●●●●●●●●●●●●●●●●●●●●●●●●●●●●●●●●●●●●●●●●●●●●●●●●●●●●●●●●●●●●●●●●●●●●●●●●●●●●●●●●●●●●●●●●●●●●●●●●●●●●●●●●●●●●●●●●●●●●●●●●●●●●●●●●●●●●●●●●●●●●●●●●●●●●●●●●●●●●●●●●●●●●●●●●●●●●●●●●●●●●●●●●●●●●●●●●●●●●●●●●●●●●●●●●●●●●●●●●●●●●●●●●●●●●●●●●●●●●●●●●●●●●●●●●●●●●●●●●●●●●●●●●●●●●●●●●●●●●●●●●●●●●●●●●●●●●●●●●●●●●●●●●●●●●●●●●●●●●●●●●●●●●●●●●●●●●●●●●●●●●●●●●●●●●●●●●●●●●●●●●●●●●●●●●●●●●●●●●●●●●●●●●●●●●●●●●●●●●●●●●●●●●●●●●●●●●●●●●●●●●●●●●●●●●●●●●●●●●●●●●●●●●●●●●●●●●●●●●●●●●●●●●●●●●●●●●●●●●●●●●●●●●●●●●●●●●●●●●●●●●●●●●●●●●●●●●●●●●●●●●●●●●●●●●●●●●●●●●●●●●●●●●●●●●●●●●●●●●●●●●●●●●●●●●●●●●●●●●●●●●●●●●●●●●●●●●●●●●●●●●●●●●●●●●●●●●●●●●●●●●●●●●●●●●●●●●●●●●●●●●●●●●●●●●●●●●●●●●●●●●●●●●●●●●●●●●●●●●●●●●●●●●●●●●●●●●●●●●●●●●●●●●●●●●●●●●●●●●●●●●●●●●●●●●●●●●●●●●●●●●●●●●●●●●●●●●●●●●●●●●●●●●●●●●●●●●●●●●●●●●●●●●●●●●●●●●●●●●●●●●●●●●●●●●●●●●●●●●●●●●●●●●●●●●●●●●●●●●●●●●●●●●●●●●●●●●●●●●●●●●●●●●●●●●●●●●●●●●●●●●●●●●●●●●●●●●●●●●●●●●●●●●●●●●●●●●●●●●●●●●●●●●●●●●●●●●●●●●●●●●●●●●●●●●●●●●●●●●●●●●●●●●●●●●●●●●●●●●●●●●●●●●●●●●●●●●●●●●●●●●●●●●●●●●●●●●●●●●●●●●●●●●●●●●●●●●●●●●●●●●●●●●●●●●●●●●●●●●●●●●●●●●●●●●●●●●●●●●●●●●●●●●●●●●●●●●●●●●●●●●●●●●●●●●●●●●●●●●●●●●●●●●●●●●●●●●●●●●●●●●●●●●●●●●●●●●●●●●●●●●●●●●●●●●●●●●●●●●●●●●●●●●●●●●●●●●●●●●●●●●●●●●●●●●●●●●●●●●●●●●●●●●●●●●●●●●●●●●●●●●●●●●●●●●●●●●●●●●●●●●●●●●●●●●●●●●●●●●●●●●●●●●●●●●●●●●●●●●●●●●●●●●●●●●●●●●●●●●●●●●●●●●●●●●●●●●●●●●●●●●●●●●●●●●●●●●●●●●●●●●●●●●●●●●●●●●●●●●●●●●●●●●●●●●●●●●●●●●●●●●●●●●●●●●●●●●●●●●●●●●●●●●●●●●●●●●●●●●●●●●●●●●●●●●●●●●●●●●●●●●●●●●●●●●●●●●●●●●●●●●●●●●●●●●●●●●●●●●●●●●●●●●●●●●●●●●●●●●●●●●●●●●●●●●●●●●●●●●●●●●●●●●●●●●●●●●●●●●●●●●●●●●●●●●●●●●●●●●●●●●●●●●●●●●●●●●●●●●●●●●●●●●●●●●●●●●●●●●●●●●●●●●●●●●●●●●●●●●●●●●●●●●●●●●●●●●●●●●●●●●●●●●●●●●●●●●●●●●●●●●●●●●●●●●●●●●●●●●●●●●●●●●●●●●●●●●●●●●●●●●●●●●●●●●●●●●●●●●●●●●●●●●●●●●●●●●●●●●●●●●●●●●●●●●●●●●●●●●●●●●●●●●●●●●●●●●●●●●●●●●●●●●●●●●●●●●●●●●●●●●●●●●●●●●●●●●●●●●●●●●●●●●●●●●●●●●●●●●●●●●●●●●●●●●●●●●●●●●●●●●●●●●●●●●●●●●●●●●●●●●●●●●●●●●●●●●●●●●●●●●●●●●●●●●●●●●●●●●●●●●●●●●●●●●●●●●●●●●●●●●●●●●●●●●●●●●●●●●●●●●●●●●●●●●●●●●●●●●●●●●●●●●●●●●●●●●●●●●●●●●●●●●●●●●●●●●●●●●●●●●●●●●●●●●●●●●●●●●●●●●●●●●●●●●●●●●●●●●●●●●●●●●●●●●●●●●●●●●●●●●●●●●●●●●●●●●●●●●●●●●●●●●●●●●●●●●●●●●●●●●●●●●●●●●●●●●●●●●●●●●●●●●●●●●●●●●●●●●●●●●●●●●●●●●●●●●●●●●●●●●●●●●●●●●●●●●●●●●●●●●●●●●●●●●●●●●●●●●●●●●●●●●●●●●●●●●●●●●●●●●●●●●●●●●●●●●●●●●●●●●●●●●●●●●●●●●●●●●●●●●●●●●●●●●●●●●●●●●●●●●●●●●●●●●●●●●●●●●●●●●●●●●●●●●●●●●●●●●●●●●●●●●●●●●●●●●●●●●●●●●●●●●●●●●●●●●●●●●●●●●●●●●●●●●●●●●●●●●●●●●●●●●●●●●●●●●●●●●●●●●●●●●●●●●●●●●●●●●●●●●●●●●●●●●●●●●●●●●●●●●●●●●●●●●●●●●●●●●●●●●●●●●●●●●●●●●●●●●●●●●●●●●●●●●●●●●●●●●●●●●●●●●●●●●●●●●●●●●●●●●●●●●●●●●●●●●●●●●●●●●●●●●●●●●●●●●●●●●●●●●●●●●●●●●●●●●●●●●●●●●●●●●●●●●●●●●●●●●●●●●●●●●●●●●●●●●●●●●●●●●●●●●●●●●●●●●●●●●●●●●●●●●●●●●●●●●●●●●●●●●●●●●●●●●●●●●●●●●●●●●●●●●●●●●●●●●●●●●●●●●●●●●●●●●●●●●●●●●●●●●●●●●●●●●●●●●●●●●●●●●●●●●●●●●●●●●●●●●●●●●●●●●●●●●●●●●●●●●●●●●●●●●●●●●●●●●●●●●●●●●●●●●●●●●●●●●●●●●●●●●●●●●●●●●●●●●●●●●●●●●●●●●●●●●●●●●●●●●●●●●●●●●●●●●●●●●●●●●●●●●●●●●●●●●●●●●●●●●●●●●●●●●●●●●●●●●●●●●●●●●●●●●●●●●●●●●●●●●●●●●●●●●●●●●●●●●●●●●●●●●●●●●●●●●●●●●●●●●●●●●●●●●●●●●●●●●●●●●●●●●●●●●●●●●●●●●●●●●●●●●●●●●●●●●●●●●●●●●●●●●●●●●●●●●●●●●●●●●●●●●●●●●●●●●●●●●●●●●●●●●●●●●●●●●●●●●●●●●●●●●●●●●●●●●●●●●●●●●●●●●●●●●●●●●●●●●●●●●●●●●●●●●●●●●●●●●●●●●●●●●●●●●●●●●●●●●●●●●●●●●●●●●●●●●●●●●●●●●●●●●●●●●●●●●●●●●●●●●●●●●●●●●●●●●●●●●●●●●●●●●●●●●●●●●●●●●●●●●●●●●●●●●●●●●●●●●●●●●●●●●●●●●●●●●●●●●●●●●●●●●●●●●●●●●●●●●●●●●●●●●●●●●●●●●●●●●●●●●●●●●●●●●●●●●●●●●●●●●●●●●●●●●●●●●●●●●●●●●●●●●●●●●●●●●●●●●●●●●●●●●●●●●●●●●●●●●●●●●●●●●●●●●●●●●●●●●●●●●●●●●●●●●●●●●●●●●●●●●●●●●●●●●●●●●●●●●●●●●●●●●●●●●●●●●●●●●●●●●●●●●●●●●●●●●●●●●●●●●●●●●●●●●●●●●●●●●●●●●●●●●●●●●●●●●●●●●●●●●●●●●●●●●●●●●●●●●●●●●●●●●●●●●●●●●●●●●●●●●●●●●●●●●●●●●●●●●●●●●●●●●●●●●●●●●●●●●●●●●●●●●●●●●●●●●●●●●●●●●●●●●●●●●●●●●●●●●●●●●●●●●●●●●●●●●●●●●●●●●●●●●●●●●●●●●●●●●●●●●●●●●●●●●●●●●●●●●●●●●●●●●●●●●●●●●●●●●●●●●●●●●●●●●●●●●●●●●●●●●●●●●●●●●●●●●●●●●●●●●●●●●●●●●●●●●●●●●●●●●●●●●●●●●●●●●●●●●●●●●●●●●●●●●●●●●●●●●●●●●●●●●●●●●●●●●●●●●●●●●●●●●●●●●●●●●●●●●●●●●●●●●●●●●●●●●●●●●●●●●●●●●●●●●●●●●●●●●●●●●●●●●●●●●●●●●●●●●●●●●●●●●●●●●●●●●●●●●●●●●●●●●●●●●●●●●●●●●●●●●●●●●●●●●●●●●●●●●●●●●●●●●●●●●●●●●●●●●●●●●●●●●●●●●●●●●●●●●●●●●●●●●●●●●●●●●●●●●●●●●●●●●●●●●●●●●●●●●●●●●●●●●●●●●●●●●●●●●●●●●●●●●●●●●●●●●●●●●●●●●●●●●●●●●●●●●●●●●●●●●●●●●●●●●●●●●●●●●●●●●●●●●●●●●●●●●●●●●●●●●●●●●●●●●●●●●●●●●●●●●●●●●●●●●●●●●●●●●●●●●●●●●●●●●●●●●●●●●●●●●●●●●●●●●●●●●●●●●●●●●●●●●●●●●●●●●●●●●●●●●●●●●●●●●●●●●●●●●●●●●●●●●●●●●●●●●●●●●●●●●●●●●●●●●●●●●●●●●●●●●●●●●●●●●●●●●●●●●●●●●●●●●●●●●●●●●●●●●●●●●●●●●●●●●●●●●●●●●●●●●●●●●●●●●●●●●●●●●●●●●●●●●●●●●●●●●●●●●●●●●●●●●●●●●●●●●●●●●●●●●●●●●●●●●●●●●●●●●●●●●●●●●●●●●●●●●●●●●●●●●●●●●●●●●●●●●●●●●●●●●●●●●●●●●●●●●●●●●●●●●●●●●●●●●●●●●●●●●●●●●●●●●●●●●●●●●●●●●●●●●●●●●●●●●●●●●●●●●●●●●●●●●●●●●●●●●●●●●●●●●●●●●●●●●●●●●●●●●●●●●●●●●●●●●●●●●●●●●●●●●●●●●●●●●●●●●●●●●●●●●●●●●●●●●●●●●●●●●●●●●●●●●●●●●●●●●●●●●●●●●●●●●●●●●●●●●●●●●●●●●●●●●●●●●●●●●●●●●●●●●●●●●●●●●●●●●●●●●●●●●●●●●●●●●●●●●●●●●●●●●●●●●●●●●●●●●●●●●●●●●●●●●●●●●●●●●●●●●●●●●●●●●●●●●●●●●●●●●●●●●●●●●●●●●●●●●●●●●●●●●●●●●●●●●●●●●●●●●●●●●●●●●●●●●●●●●●●●●●●●●●●●●●●●●●●●●●●●●●●●●●●●●●●●●●●●●●●●●●●●●●●●●●●●●●●●●●●●●●●●●●●●●●●●●●●●●●●●●●●●●●●●●●● |      |      |      |      |      |      |      |  |

|              | 1540                                                                                                                                                                                                                                                                                                                                                                                                                                                                                                                                                                                                                                                                                                                                                                                                                                                                                                                                                                                                                                                                                                                                                                                                                                                                                                                                                                                                                                                                                                                                                                                                                                                                                                                                                                                                                                                                                                                                                                                                                                                                                                                                                                                                                                                                                                                                                                                                                                                                                                                                                                                                                                                                                                                                                                                                                                                                                                                                                                                                                                                                                                                                                                                                                                                                                                                                                                                                                                                                                                                                                                                                                                                                                                                                                                                                                                                                                                                                                                                                                                                                                                                                                                                                                                                                                                                                                                                                                                                                                                                                                                                                                                                                                                                                                                                                                                                                                                                                                                                                                                                                                                                                                                                                                                                                                                                                                                                                                                                                                                                                                                                                                                                                                                                                                                                                                                                                                                                                                                                                                                                                                                                                                                                                                                                                                                                                                                                                                                                                                                                                                                                                                                                                                                                                                                                                                                                                                                                                                                                                                                                                                                                                                                                                                                                                                                                                                                                                                                                                                                                                                                                                                                                                                                                                                                                                                                                                                                                                                                                                                                                                                                                                                                                                                                                                                                                                                                                                                                                                                                                                                                                                                                                                                                                                                                                                                                                                                                                                                                                                                                                                                                                                                                                                                                                                                                                                                                                                                                                                                                                                                                                                                                                                                                                                                                                                                                                                                                                                                                                                                                                                                                                                                                                                                                                                                                                                                                                                                                                                                                                                                                                                                                                                                                                                                                                                                                                                                                                                                                                                                                                                                                                                                                                                                                                                                                                                                                                                                                                                                                                                                                                                                                                                                                                                                                                                                                                                                                                                                                                                                                                                                                                                                                                                                                                                                                                                                                                                                                                                                                                                                                                                                                                                                                                                                                                            | 1550 | 1560 | 1570 | 1580 | 1590 | 1600 | 1610 |  |
|--------------|-------------------------------------------------------------------------------------------------------------------------------------------------------------------------------------------------------------------------------------------------------------------------------------------------------------------------------------------------------------------------------------------------------------------------------------------------------------------------------------------------------------------------------------------------------------------------------------------------------------------------------------------------------------------------------------------------------------------------------------------------------------------------------------------------------------------------------------------------------------------------------------------------------------------------------------------------------------------------------------------------------------------------------------------------------------------------------------------------------------------------------------------------------------------------------------------------------------------------------------------------------------------------------------------------------------------------------------------------------------------------------------------------------------------------------------------------------------------------------------------------------------------------------------------------------------------------------------------------------------------------------------------------------------------------------------------------------------------------------------------------------------------------------------------------------------------------------------------------------------------------------------------------------------------------------------------------------------------------------------------------------------------------------------------------------------------------------------------------------------------------------------------------------------------------------------------------------------------------------------------------------------------------------------------------------------------------------------------------------------------------------------------------------------------------------------------------------------------------------------------------------------------------------------------------------------------------------------------------------------------------------------------------------------------------------------------------------------------------------------------------------------------------------------------------------------------------------------------------------------------------------------------------------------------------------------------------------------------------------------------------------------------------------------------------------------------------------------------------------------------------------------------------------------------------------------------------------------------------------------------------------------------------------------------------------------------------------------------------------------------------------------------------------------------------------------------------------------------------------------------------------------------------------------------------------------------------------------------------------------------------------------------------------------------------------------------------------------------------------------------------------------------------------------------------------------------------------------------------------------------------------------------------------------------------------------------------------------------------------------------------------------------------------------------------------------------------------------------------------------------------------------------------------------------------------------------------------------------------------------------------------------------------------------------------------------------------------------------------------------------------------------------------------------------------------------------------------------------------------------------------------------------------------------------------------------------------------------------------------------------------------------------------------------------------------------------------------------------------------------------------------------------------------------------------------------------------------------------------------------------------------------------------------------------------------------------------------------------------------------------------------------------------------------------------------------------------------------------------------------------------------------------------------------------------------------------------------------------------------------------------------------------------------------------------------------------------------------------------------------------------------------------------------------------------------------------------------------------------------------------------------------------------------------------------------------------------------------------------------------------------------------------------------------------------------------------------------------------------------------------------------------------------------------------------------------------------------------------------------------------------------------------------------------------------------------------------------------------------------------------------------------------------------------------------------------------------------------------------------------------------------------------------------------------------------------------------------------------------------------------------------------------------------------------------------------------------------------------------------------------------------------------------------------------------------------------------------------------------------------------------------------------------------------------------------------------------------------------------------------------------------------------------------------------------------------------------------------------------------------------------------------------------------------------------------------------------------------------------------------------------------------------------------------------------------------------------------------------------------------------------------------------------------------------------------------------------------------------------------------------------------------------------------------------------------------------------------------------------------------------------------------------------------------------------------------------------------------------------------------------------------------------------------------------------------------------------------------------------------------------------------------------------------------------------------------------------------------------------------------------------------------------------------------------------------------------------------------------------------------------------------------------------------------------------------------------------------------------------------------------------------------------------------------------------------------------------------------------------------------------------------------------------------------------------------------------------------------------------------------------------------------------------------------------------------------------------------------------------------------------------------------------------------------------------------------------------------------------------------------------------------------------------------------------------------------------------------------------------------------------------------------------------------------------------------------------------------------------------------------------------------------------------------------------------------------------------------------------------------------------------------------------------------------------------------------------------------------------------------------------------------------------------------------------------------------------------------------------------------------------------------------------------------------------------------------------------------------------------------------------------------------------------------------------------------------------------------------------------------------------------------------------------------------------------------------------------------------------------------------------------------------------------------------------------------------------------------------------------------------------------------------------------------------------------------------------------------------------------------------------------------------------------------------------------------------------------------------------------------------------------------------------------------------------------------------------------------------------------------------------------------------------------------------------------------------------------------------------------------------------------------------------------------------------------------------------------------------------------------------------------------------------------------------------------------------------------------------------------------------------------------------------------------------------------------------------------------------------------------------------------------------------------------------------------------------------------------------------------------------------------------------------------------------------------------------------------------------------------------------------------------------------------------------------------------------------------------------------------------------------------------------------------------------------------------------------------------------------------------------------------------------------------------------------------------------------------------------------------------------------------------------------------------------------------------------------------------------------------------------------------------------------------------------------------------------------------------------------------------------------------------------------------------------------------------------------------------------------------------------------------------------------------------------------------------------------------------------------------------------------------------------------------------------------------------------------------------------------------------------------------------------------------------------------------------------------------------------------------------------------------------------------------------------------------------------------------------------------------------------------------------------------------------------------------------------------------------------------------------------------------------------------------------------------------------------------------------------------------------------------------------------------------------------------------------------------------------------------------------------------------------------------------------------------------------------------------------------------------------------------------------------------------------------------------------------------------------------------------------------------------------------------------------------------------------------------------------------------------------------------------------------------------------------------------------------------------------------------------------------------------------------------------------------------------|------|------|------|------|------|------|------|--|
| conservation | ●●●●●●●●●●●●●●●●●●●●●●●●●●●●●●●●●●●●●●●●●●●●●●●●●●●●●●●●●●●●●●●●●●●●●●●●●●●●●●●●●●●●●●●●●●●●●●●●●●●●●●●●●●●●●●●●●●●●●●●●●●●●●●●●●●●●●●●●●●●●●●●●●●●●●●●●●●●●●●●●●●●●●●●●●●●●●●●●●●●●●●●●●●●●●●●●●●●●●●●●●●●●●●●●●●●●●●●●●●●●●●●●●●●●●●●●●●●●●●●●●●●●●●●●●●●●●●●●●●●●●●●●●●●●●●●●●●●●●●●●●●●●●●●●●●●●●●●●●●●●●●●●●●●●●●●●●●●●●●●●●●●●●●●●●●●●●●●●●●●●●●●●●●●●●●●●●●●●●●●●●●●●●●●●●●●●●●●●●●●●●●●●●●●●●●●●●●●●●●●●●●●●●●●●●●●●●●●●●●●●●●●●●●●●●●●●●●●●●●●●●●●●●●●●●●●●●●●●●●●●●●●●●●●●●●●●●●●●●●●●●●●●●●●●●●●●●●●●●●●●●●●●●●●●●●●●●●●●●●●●●●●●●●●●●●●●●●●●●●●●●●●●●●●●●●●●●●●●●●●●●●●●●●●●●●●●●●●●●●●●●●●●●●●●●●●●●●●●●●●●●●●●●●●●●●●●●●●●●●●●●●●●●●●●●●●●●●●●●●●●●●●●●●●●●●●●●●●●●●●●●●●●●●●●●●●●●●●●●●●●●●●●●●●●●●●●●●●●●●●●●●●●●●●●●●●●●●●●●●●●●●●●●●●●●●●●●●●●●●●●●●●●●●●●●●●●●●●●●●●●●●●●●●●●●●●●●●●●●●●●●●●●●●●●●●●●●●●●●●●●●●●●●●●●●●●●●●●●●●●●●●●●●●●●●●●●●●●●●●●●●●●●●●●●●●●●●●●●●●●●●●●●●●●●●●●●●●●●●●●●●●●●●●●●●●●●●●●●●●●●●●●●●●●●●●●●●●●●●●●●●●●●●●●●●●●●●●●●●●●●●●●●●●●●●●●●●●●●●●●●●●●●●●●●●●●●●●●●●●●●●●●●●●●●●●●●●●●●●●●●●●●●●●●●●●●●●●●●●●●●●●●●●●●●●●●●●●●●●●●●●●●●●●●●●●●●●●●●●●●●●●●●●●●●●●●●●●●●●●●●●●●●●●●●●●●●●●●●●●●●●●●●●●●●●●●●●●●●●●●●●●●●●●●●●●●●●●●●●●●●●●●●●●●●●●●●●●●●●●●●●●●●●●●●●●●●●●●●●●●●●●●●●●●●●●●●●●●●●●●●●●●●●●●●●●●●●●●●●●●●●●●●●●●●●●●●●●●●●●●●●●●●●●●●●●●●●●●●●●●●●●●●●●●●●●●●●●●●●●●●●●●●●●●●●●●●●●●●●●●●●●●●●●●●●●●●●●●●●●●●●●●●●●●●●●●●●●●●●●●●●●●●●●●●●●●●●●●●●●●●●●●●●●●●●●●●●●●●●●●●●●●●●●●●●●●●●●●●●●●●●●●●●●●●●●●●●●●●●●●●●●●●●●●●●●●●●●●●●●●●●●●●●●●●●●●●●●●●●●●●●●●●●●●●●●●●●●●●●●●●●●●●●●●●●●●●●●●●●●●●●●●●●●●●●●●●●●●●●●●●●●●●●●●●●●●●●●●●●●●●●●●●●●●●●●●●●●●●●●●●●●●●●●●●●●●●●●●●●●●●●●●●●●●●●●●●●●●●●●●●●●●●●●●●●●●●●●●●●●●●●●●●●●●●●●●●●●●●●●●●●●●●●●●●●●●●●●●●●●●●●●●●●●●●●●●●●●●●●●●●●●●●●●●●●●●●●●●●●●●●●●●●●●●●●●●●●●●●●●●●●●●●●●●●●●●●●●●●●●●●●●●●●●●●●●●●●●●●●●●●●●●●●●●●●●●●●●●●●●●●●●●●●●●●●●●●●●●●●●●●●●●●●●●●●●●●●●●●●●●●●●●●●●●●●●●●●●●●●●●●●●●●●●●●●●●●●●●●●●●●●●●●●●●●●●●●●●●●●●●●●●●●●●●●●●●●●●●●●●●●●●●●●●●●●●●●●●●●●●●●●●●●●●●●●●●●●●●●●●●●●●●●●●●●●●●●●●●●●●●●●●●●●●●●●●●●●●●●●●●●●●●●●●●●●●●●●●●●●●●●●●●●●●●●●●●●●●●●●●●●●●●●●●●●●●●●●●●●●●●●●●●●●●●●●●●●●●●●●●●●●●●●●●●●●●●●●●●●●●●●●●●●●●●●●●●●●●●●●●●●●●●●●●●●●●●●●●●●●●●●●●●●●●●●●●●●●●●●●●●●●●●●●●●●●●●●●●●●●●●●●●●●●●●●●●●●●●●●●●●●●●●●●●●●●●●●●●●●●●●●●●●●●●●●●●●●●●●●●●●●●●●●●●●●●●●●●●●●●●●●●●●●●●●●●●●●●●●●●●●●●●●●●●●●●●●●●●●●●●●●●●●●●●●●●●●●●●●●●●●●●●●●●●●●●●●●●●●●●●●●●●●●●●●●●●●●●●●●●●●●●●●●●●●●●●●●●●●●●●●●●●●●●●●●●●●●●●●●●●●●●●●●●●●●●●●●●●●●●●●●●●●●●●●●●●●●●●●●●●●●●●●●●●●●●●●●●●●●●●●●●●●●●●●●●●●●●●●●●●●●●●●●●●●●●●●●●●●●●●●●●●●●●●●●●●●●●●●●●●●●●●●●●●●●●●●●●●●●●●●●●●●●●●●●●●●●●●●●●●●●●●●●●●●●●●●●●●●●●●●●●●●●●●●●●●●●●●●●●●●●●●●●●●●●●●●●●●●●●●●●●●●●●●●●●●●●●●●●●●●●●●●●●●●●●●●●●●●●●●●●●●●●●●●●●●●●●●●●●●●●●●●●●●●●●●●●●●●●●●●●●●●●●●●●●●●●●●●●●●●●●●●●●●●●●●●●●●●●●●●●●●●●●●●●●●●●●●●●●●●●●●●●●●●●●●●●●●●●●●●●●●●●●●●●●●●●●●●●●●●●●●●●●●●●●●●●●●●●●●●●●●●●●●●●●●●●●●●●●●●●●●●●●●●●●●●●●●●●●●●●●●●●●●●●●●●●●●●●●●●●●●●●●●●●●●●●●●●●●●●●●●●●●●●●●●●●●●●●●●●●●●●●●●●●●●●●●●●●●●●●●●●●●●●●●●●●●●●●●●●●●●●●●●●●●●●●●●●●●●●●●●●●●●●●●●●●●●●●●●●●●●●●●●●●●●●●●●●●●●●●●●●●●●●●●●●●●●●●●●●●●●●●●●●●●●●●●●●●●●●●●●●●●●●●●●●●●●●●●●●●●●●●●●●●●●●●●●●●●●●●●●●●●●●●●●●●●●●●●●●●●●●●●●●●●●●●●●●●●●●●●●●●●●●●●●●●●●●●●●●●●●●●●●●●●●●●●●●●●●●●●●●●●●●●●●●●●●●●●●●●●●●●●●●●●●●●●●●●●●●●●●●●●●●●●●●●●●●●●●●●●●●●●●●●●●●●●●●●●●●●●●●●●●●●●●●●●●●●●●●●●●●●●●●●●●●●●●●●●●●●●●●●●●●●●●●●●●●●●●●●●●●●●●●●●●●●●●●●●●●●●●●●●●●●●●●●●●●●●●●●●●●●●●●●●●●●●●●●●●●●●●●●●●●●●●●●●●●●●●●●●●●●●●●●●●●●●●●●●●●●●●●●●●●●●●●●●●●●●●●●●●●●●●●●●●●●●●●●●●●●●●●●●●●●●●●●●●●●●●●●●●●●●●●●●●●●●●●●●●●●●●●●●●●●●●●●●●●●●●●●●●●●●●●●●●●●●●●●●●●●●●●●●●●●●●●●●●●●●●●●●●●●●●●●●●●●●●●●●●●●●●●●●●●●●●●●●●●●●●●●●●●●●●●●●●●●●●●●●●●●●●●●●●●●●●●●●●●●●●●●●●●●●●●●●●●●●●●●●●●●●●●●●●●●●●●●●●●●●●●●●●●●●●●●●●●●●●●●●●●●●●●●●●●●●●●●●●●●●●●●●●●●●●●●●●●●●●●●●●●●●●●●●●●●●●●●●●●●●●●●●●●●●●●●●●●●●●●●●●●●●●●●●●●●●●●●●●●●●●●●●●●●●●●●●●●●●●●●●●●●●●●●●●●●●●●●●●●●●●●●●●●●●●●●●●●●●●●●●●●●●●●●●●●●●●●●●●●●●●●●●●●●●●●●●●●●●●●●●●●●●●●●●●●●●●●●●●●●●●●●●●●●●●●●●●●●●●●●●●●●●●●●●●●●●●●●●●●●●●●●●●●●●●●●●●●●●●●●●●●●●●●●●●●●●●●●●●●●●●●●●●●●●●●●●●●●●●●●●●●●●●●●●●●●●●●●●●●●●●●●●●●●●●●●●●●●●●●●●●●●●●●●●●●●●●●●●●●●●●●●●●●●●●●●●●●●●●●●●●●●●●●●●●●●●●●●●●●●●●●●●●●●●●●●●●●●●●●●●●●●●●●●●●●●●●●●●●●●●●●●●●●●●●●●●●●●●●●●●●●●●●●●●●●●●●●●●●●●●●●●●●●●●●●●●●●●●●●●●●●●●●●●●●●●●●●●●●●●●●●●●●●●●●●●●●●●●●●●●●●●●●●●●●●●●●●●●●●●●●●●●●●●●●●●●●●●●●●●●●●●●●●●●●●●●●●●●●●●●●●●●●●●●●●●●●●●●●●●●●●●●●●●●●●●●●●●●●●●●●●●●●●●●●●●●●●●●●●●●●●●●●●●●●●●●●●●●●●●●●●●●●●●●●●●●●●●●●●●●●●●●●●●●●●●●●●●●●●●●●●●●●●●●●●●●●●●●●●●●●●●●●●●●●●●●●●●●●●●●●●●●●●●●●●●●●●●●●●●●●●●●●●●●●●●●●●●●●●●●●●●●●●●●●●●●●●●●●●●●●●●●●●●●●●●●●●●●●●●●●●●●●●●●●●●●●●●●●●●●●●●●●●●●●●●●●●●●●●●●●●●●●●●●●●●●●●●●●●●●●●●●●●●●●●●●●●●●●●●●●●●●●●●●●●●●●●●●●●●●●●●●●●●●●●●●●●●●●●●●●●●●●●●●●●●●●●●●●●●●●●●●●●●●●●●●●●●●●●●●●●●●●●●●●●●●●●●●●●●●●●●●●●●●●●●●●●●●●●●●●●●●●●●●●●●●●●●●●●●●●●●●●●●●●●●●●●●●●●●●●●●●●●●●●●●●●●●●●●●●●●●●●●●●●●●●●●●●●●●●●●●●●●●●●●●●●●●●●●●●●●●●●●●●●●●●●●●●●●●●●●●●●●●●●●●●●●●●●●●●●●●●●●●●●●●●●●●●●●●●●●●●●●●●●●●●●●●●●●●●●●●●●●●●●●●●●●●●●●●●●●●●●●●●●●●●●●●●●●●●●●●●●●●●●●●●●●●●●●●●●●●●●●●●●●●●●●●●●●●●●●●●●●●●●●●●●●●●●●●●●●●●●●●●●●●●●●●●●●●●●●●●●●●●●●●●●●●●●●●●●●●●●●●●●●●●●●●●●●●●●●●●●●●●●●●●●●●●●●●●●●●●●●●●●●●●●●●●●●●●●●●●●●●●●●●●●●●●●●●●●●●●●●●●●●●●●●●●●●●●●●●●●●●●●●●●●●●●●●●●●●●●●●●●●●●●●●●●●●●●●●●●●●●●●●●●●●●●●●●●●●●●●●●●●●●●●●●●●●●●●●●●●●●●●●●●●●●●●●●●●●●●●●●●●●●●●●●●●●●●●●●●●●●●●●●●●●●●●●●●●●●●●●●●●●●●●●●●●●●●●●●●●●●●●●●●●●●●●●●●●●●●●●●●●●●●●●●●●●●●●●●●●●●●●●●●●●●●●●●●●●●●●●●●●●●●●●●●●●●●●●●●●●●●●●●●●●●●●●●●●●●●●●●●●●●●●●●●●●●●●●●●●●●●●●●●●●●●●●●●●●●●●●●●●●●●●●●●●●●●●●●●●●●●●●●●●●●●●●●●●●●●●●●●●●●●●●●●●●●●●●●●●●●●●●●●●●●●●●●●●●●●●●●●●●●●●●●●●●●●●●●●●●●●●●●●●●●●●●●●●●●●●●●●●●●●●●●●●●●●●●●●●●●●●●●●●●●●●●●●●●●●●●●●●●●●●●●●●●●●●●●●●●●●●●●●●●●●●●●●●●●●●●●●●●●●●●●●●●●●●●●●●●●●●●●●●●●●●●●●●●●●●●●●●●●●●●●●●●●●●●●●●●●●●●●●●●●●●●●●●●●●●●●●●●●●●●●●●●●●●●●●●●●●●●●●●●●●●●●●●●●●●●●●●●●●●●●●●●●●●●●●●●●●●●●●●●●●●●●●●●●●●●●●●●●●●●●●●●●●●●●●●●●●●●●●●●●●●●●●●●●●●●●●●●●●●●●●●●●●●●●●●●●●●●●●●●●●●●●●●●●●●●●●●●●●●●●●●●●●●●●●●●●●●●●●●●●●●●●●●●●●●●●●●●●●●●●●●●●●●●●●●●●●●●●●●●●●●●●●●●●●●●●●●●●●●●●●●●●●●●●●●●●●●●●●●●●●●●●●●●●●●●●●●●●●●●●●●●●●●●●●●●●●●●●●●●●●●●●●●●●●●●●●●●●●●●●●●●●●●●●●●●●●●●●●●●●●●●●●●●●●●●●●●●●●●●●●●●●●●●●●●●●●●●●●●●●●●●●●●●●●●●●●●●●●●●●●●●●●●●●●●●●●●●●●●●●●●●●●●●●●●●●●●●●●●●●●●●●●●●●●●●●●●●●●●●●●●●●●●●●●●●●●●●●●●●●●●●●●●●●●●●●●●●●●●●●●●●●●●●●●●●●●●●●●●●●●●●●●●●●●●●●●●●●●●●●●●●●●●●●●●●●●●●●●●●●●●●●●●●●●●●●●●●●●●●●●●●●●●●●●●●●●●●●●●●●●●●●●●●●●●●●●●●●●●●●●●●●●●●●●●●●●●●●●●●●●●●●●●●●●●●●●●●●●●●●●●●●●●●●●●●●●●●●●●●●●●●●●●●●●●●●●●●●●●●●●●●●●●●●●●●●●●●●●●●●●●●●●●●●●●●●●●●●●●●●●●●●●●●●●●●●●●●●●●●●●●●●●●●●●●●●●●●●●●●●●●●●●●●●●●●●●●●●●●●●●●●●●●●●●●●●●●●●●●●●●●●●●●●●●●●●●●●●●●●●●●●●●●●●●●●●●●●●●●●●●●●●●●●●●●●●●●●●●●●●●●●●●●●●●●●●●●●●●●●●●●●●●●●●●●●●●●●●●●●●●●●●●●●●●●●●●●●●●●●●●●●●●●●●●●●●●●●●●●●●●●●●●●●●●●●●●●●●●●●●●●●●●●●●●●●●●●●●●●●●●●●●●●●●●●●●●●●●●●●●●●●●●●●●●●●●●●●●●●●●●●●●●●●●●●●●●●●●●●●●●●●●●●●●●●●●●●●●●●●●●●●●●●●●●●●●●●●●●●●●●●●●●●●●●●●●●●●●●●●●●●●●●●●●●●●●●●●●●●●●●●●●●●●●●●●●●●●●●●●●●●●●●●●●●●●●●●●●●●●●●●●●●●●●●●●●●●●●●●●●●●●●●●●●●●●●●●●●●●●●●●●●●●●●●●●●●●●●●●●●●●●●●●●●●●●●●●●●●●●●●●●●●●●●●●●●●●●●●●●●●●●●●●●●●●●●●●●●●●●●●●●●●●●●●●●●●●●●●●●●●●●●●●●●●●●●●●●●●●●●●●●●●●●●●●●●●●●●●●●●●●●●●●●●●●●●●●●●●●●●●●●●●●●●●●●●●●●●●●●●●●●●●●●●●●●●●●●●●●●●●●●●●●●●●●●●●●●●●●●●●●●●●●●●●●●●●●●●●●●●●●●●●●●●●●●●●●●●●●●●●●●●●●●●●●●●●●●●●●●●●●●●●●●●●●●●●●●●●●●●●●●●●●●●●●●●●●●●●●●●●●●●●●●●●●●●●●●●●●●●●●●●●●●●●●●●●●●●●●●●●●●●●●●●●●●●●●●●●●●●●●●●●●●●●●●●●●●●●●●●●●●●●●●●●●●●●●●●●●●●●●●●●●●●●●●●●●●●●●●●●●●●●●●●●●●●●●●●●●●●●●●●●●●●●●●●●●●●●●●●●●●●●●●●●●●●●●●●●●●●●●●●●●●●●●●●●●●●●●●●●●●●●●●●●●●●●●●●●●●●●●●●●●●●●●●●●●●●●●●●●●●●●●●●●●●●●●●●●●●●●●●●●●●●●●●●●●●●●●●●●●●●●●●●●●●●●●●●●●●●●●●●●●●●●●●●●●●●●●●●●●●●●●●●●●●●●●●●●●●●●●●●●●●●●●●●●●●●●●●●●●●●●●●●●●●●●●●●●●●●●●●●●●●●●●●●●●●●●●●●●●●●●●●●●●●●●●●●●●●●●●●●●●●●●●●●●●●●●●●●●●●●●●●●●●●●●●●●●●●●●●●●●●●●●●●●●●●●●●●●●●●●●●●●●●●●●●●●●●●●●●●●●●●●●●●●●●●●●●●●●●●●●●●●●●●●●●●●●●●●●●●●●●●●●●●●●●●●●●●●●●●●●●●●●●●●●●●●●●●●●●●●●●●●●●●●●●●●●●●●●●●●●●●●●●●●●●●●●●●●●●●●●●●●●●●●●●●●●●●●●●●●●●●●●●●●●●●●●●●●●●●●●●●●●●●●●●●●●●●●●●●●●●●●●●●●●●●●●●●●●●●●●●●●●●●●●●●●●●●●●●●●●●●●●●●●●●●●●●●●●●●●●●●●●●●●●●●●●●●●●●●●●●●●●●●●●●●●●●●●●●●●●●●●●●●●●●●●●●●●●●●●●●●●●●●●●●●●●●●●●●●●●●●●●●●●●●●●●●●●●●●●●●●●●●●●●●●●●●●●●●●●●●●●●●●●●●●●●●●●●●●●●●●●●●●●●●●●●●●●●●●●●●●●●●●●●●●●●●●●●●●●●●●●●●●●●●●●●●●●●●●●●●●●●●●●●●●●●●●●●●●●●●●●●●●●●●●●●●●●●●●●●●●●●●●●●●●●●●●●●●●●●●●●●●●●●●●●●●●●●●●●●●●●●●●●●●●●●●●●●●●●●●●●●●●●●●●●●●●●●●●●●●●●●●●●●●●●●●●●●●●●●●●●●●●●●●●●●●●●●●●●●●●●●●●●●●●●●●●●●●●●●●●●●●●●●●●●●●●●●●●●●●●●●●●●●●●●●●●●●●●●●●●●●●●●●●●●●●●●●●●●●●●●●●●●●●●●●●●●●●●●●●●●●●●●●●●●●●●●●●●●●●●●●●●●●●●●●●●●●●●●●●●●●●●●●●●●●●●●●●●●●●●●●●●●●●●●●●●●●●●●●●●●●●●●●●●●●●●●●●●●●●●●●●●●●●●●●●●●●●●●●●●●●●●●●●●●●●●●●●●●●●●●●●●●●●●●●●●●●●●●●●●●●●●●●●●●●●●●●●●●●●●●●●●●●●●●●●●●●●●●●●●●●●●●●●●●●●●●●●●●●●●●●●●●●●●●●●●●●●●●●●●●●●●●●●●●●●●●●●●●●●●●●●●●●●●●●●●●●●●●●●●●●●●●●●●●●●●●●●●●●●●●●●●●●●●●●●●●●●●●●●●●●●●●●●●●●●●●●●●●●●●●●●●●●●●●●●●●●●●●●●●●●●●●●●●●●●●●●●●●●●●●●●●●●●●●●●●●●●●●●●●●●●●●●●●●●●●●●●●●●●●●●●●●●●●●●●●●●●●●●●●●●●●●●●●●●●●●●●●●●●●●●●●●●●●●●●●●●●●●●●●●●●●●●●●●●●●●●●●●●●●●●●●●●●●●●●●●●●●●●●●●●●●●●●●●●●●●●●●●●●●●●●●●●●●●●●●●●●●●●●●●●●●●●●●●●●●●●●●●●●●●●●●●●●●●●●●●●●●●●●●●●●●●●●●●●●●●●●●●●●●●●●●●●●●●●●●●●●●●●●●●●●●●●●●●●●●●●●●●●●●●●●●●●●●●●●●●●●●●●●●●●●●●●●●●●●●●●●●●●●●●●●●●●●●●●●●●●●●●●●●●●●●●●●●●●●●●●●●●●●●●●●●●●●●●●●●●●●●●●●●●●●●●●●●●●●●●●●●●●●●●●●●●●●●●●●●●●●●●●●●●●●●●●●●●●●●●●●●●●●●●●●●●●●●●●●●●●●●●●●●●●●●●●●●●●●●●●●●●●●●●●●●●●●●●●●●●●●●●●●●●●●●●●●●●●●●●●●●●●●●●●●●●●●●●●●●●●●●●●●●●●●●●●●●●●●●●●●●●●●●●●●●●●●●●●●●●●●●●●●●●●●●●●●●●●●●●●●●●●●●●●●●●●●●●●●●●●●●●●●●●●●●●●●●●●●●●●●●●●●●●●●●●●●●●●●●●●●●●●●●●●●●●●●●●●●●●●●●●●●●●●●●●●●●●●●●●●●●●●●●●●●●●●●●●●●●●●●●●●●●●●●●●●●●●●●●●●●●●●●●●●●●●●●●●●●●●●●●●●●●●●●●●●●●●●●●●●●●●●●●●●●●●●●●●●●●●●●●●●●●●●●●●●●●●●●●●●●●●●●●●●●●●●●●●●●●●●●●●●●●●●●●●●●●●●●●●●●●●●●●●●●●●●●●●●●●●●●●●●●●●●●●●●●●●●●●●●●●●●●●●●●●●●●●●●●●●●●●●●●●●●●●●●●●●●●●●●●●●●●●●●●●●●●●●●●●●●●●●●●●●●●●●●●●●●●●●●●●●●●●●●●●●●●●●●●●●●●●●●●●●●●●●●●●●●●●●●●●●●●●●●●●●●●●●●●●●●●●●●●●●●●●●●●●●●●●●●●●●●●●●●●●●●●●●●●●●●●●●●●●●●●●●●●●●●●●●●●●●●●●●●●●●●●●●●●●●●●●●●●●●●●●●●●●●●●●●●●●●●●●●●●●●●●●●●●●●●●●●●●●●●●●●●●●●●●●●●●●●●●●●●●●●●●●●●●●●●●●●●●●●●●●●●●●●●●●●●●●●●●●●●●●●●●●●●●●●●●●●●●●●●●●●●●●●●●●●●●●●●●●●●●●●●●●●●●●●●●●●●●●●●●●●●●●●●●●●●●●●●●●●●●●●●●●●●●●●●●●●●●●●●●●●●●●●●●●●●●●●●●●●●●●●●●●●●●●●●●●●●●●●●●●●●●●●●●●●●●●●●●●●●●●●●●●●●●●●●●●●●●●●●●●●●●●●●●●●●●●●●●●●●●●●●●●●●●●●●●●●●●●●●●●●●●●●●●●●●●●●●●●●●●●●●●●●●●●●●●●●●●●●●●●●●●●●●●●●●●●●●●●●●●●●●●●●●●●●●●●●●●●●●●●●●●●●●●●●●●●●●●●●●●●●●●●●●●●●●●●●●●●●●●●●●●●●●●●●●●●●●●●●●●●●●●●●●●●●●●●●●●●●●●●●●●●●●●●●●●●●●●●●●●●●●●●●●●●●●●●●●●●●●●●●●●●●●●●●●●●●●●●●●●●●●●●●●●●●●●●●●●●●●●●●●●●●●●●●●●●●●●●●●●●●●●●●●●●●●●●●●●●●●●●●●●●●●●●●●●●●●●●●●●●●●●●●●●●●●●●●●●●●●●●●●●●●●●●●●●●●●●●●●●●●●●●●●●●●●●●●●●●●●●●●●●●●●●●●●●●●●●●●●●●●●●●●●●●●●●●●●●●●●●●●●●●●●●●●●●●●●●●●●●●●●●●●●●●●●●●●●●●●●●●●●●●●●●●●●●●●●●●●●●●●●●●●●●●●●●●●●●●●●●●●●●●●●●●●●●●●●●●●●●●●●●●●●●●●●●●●●●●●●●●●●●●●●●●●●●●●●●●●●●●●●●●●●●●●●●●●●●●●●●●●●●●●●●●●●●●●●●●●●●●●●●●●●●●●●●●●●●●●●●●●●●●●●●●●●●●●●●●●●●●●●●●●●●●●●●●●●●●●●●●●●●●●●●●●●●●●●●●●●●●●●●●●●●●●●●●●●●●●●●●●●●●●●●●●●●●●●●●●●●●●●●●●●●●●●●●●●●●●●●●●●●●●●●●●●●●●●●●●●●●●●●●●●●●●●●●●●●●●●●●●●●●●●●●●●●●●●●●●●●●●●●●●●●●●●●●●●●●●●●●●●●●●●●●●●●●●●●●●●●●●●●●●●●●●●●●●●●●●●●●●●●●●●●●●●●●●●●●●●●●●●●●●●●●●●●●●●●●●●●●●●●●●●●●●●●●●●●●●●●●●●●●●●●●●●●●●●●●●●●●●●●●●●●●●●●●●●●●●●●●●●●●●●●●●●●●●●●●●●●●●●●●●●●●●●●●●●●●●●●●●●●●●●●●●●●●●●●●●●●●●●●●●●●●●●●●●●●●●●●●●●●●●●●●●●●●●●●●●●●●●●●●●●●●●●●●●●●●●●●●●●●●●●●●●●●●●●●●●●●●●●●●●●●●●●●●●●●●●●●●●●●●●●●●●●●●●●●●●●●●●●●●●●●●●●●●●●●●●●●●●●●●●●●●●●●●●●●●●●●●●●●●●●●●●●●●●●●●●●●●●●●●●●●●●●●●●●●●●●●●●●●●●●●●●●●●●●●●●●●●●●●●●●●●●●●●●●●●●●●●●●●●●●●●●●●●●●●●●●●●●●●●●●●●●●●●●●●●●●●●●●●●●●●●●●●●●●●●●●●●●●●●●●●●●●●●●●●●●●●●●●●●●●●●●●●●●●●●●●●●●●●●●●●●●●●●●●●●●●●●●●●●●●●●●●●●●●●●●●●●●●●●●●●●●●●●●●●●●●●●●●●●●●●●●●●●●●●●●●●●●●●●●●●●●●●●●●●●●●●●●●●●●●●●●●●●●●●●●●●●●●●●●●●●●●●●●●●●●●●●●●●●●●●●●●●●●●●●●●●●●●●●●●●●●●●●●●●●●●●●●●●●●●●●●●●●●●●●●●●●●●●●●●●●●●●●●●●●●●●●●●●●●●●●●●●●●●●●●●●●●●●●●●●●●●●●●●●●●●●●●●●●●●●●●●●●●●●●●●●●●●●●●●●●●●●●●●●●●●●●●●●●●●●●●●●●●●●●●●●●●●●●●●●●●●●●●●●●●●●●●●●●●●●●●●●●●●●●●●●●●●●●●●●●●●●●●●●●●●●●●●●●●●●●●●●●●●●●●●●●●●●●●●●●●●●●●●●●●●●●●●●●●●●●●●●●●●●●●●●●●●●●●●●●●●●●●●●●●●●●●●●●●●●●●●●●●●●●●●●●●●●●●●●●●●●●●●●●●●●●●●●●●●●●●●●●●●●●●●●●●●●●●●●●●●●●●●●●●●●●●●●●●●●●●●●●●●●●●●●●●●●●●●●●●●●●●●●●●●●●●●●●●●●●●●●●●●●●●●●●●●●●●●●●●●●●●●●●●●●●●●●● |      |      |      |      |      |      |      |  |

|              | 1620                                                                                                                                                                                                                                                                                                                                                                                                                                                                                                                                                                                                                                                                                                                                                                                                                                                                                                                                                                                                                                                                                                                                                                                                                                                                                                                                                                                                                                                                                                                                                                                                                                                                                                                                                                                                                                                                                                                                                                                                                                                                                                                                                                                                                                                                                                                                                                                                                                                                                                                                                                                                                                                                                                                                                                                                                                                                                                                                                                                                                                                                                                                                                                                                                                                                                                                                                                                                                                                                                                                                                                                                                                                                                                                                                                                                                                                                                                                                                                                                                                                                                                                                                                                                                                                                                                                                                                                                                                                                                                                                                                                                                                                                                                                                                                                                                                                                                                                                                                                                                                                                                                                                                                                                                                                                                                                                                                                                                                                                                                                                                                                                                                                                                                                                                                                                                                                                                                                                                                                                                                                                                                                                                                                                                                                                                                                                                                                                                                                                                                                                                                                                                                                                                                                                                                                                                                                                                                                                                                                                                                                                                                                                                                                                                                                                                                                                                                                                                                                                                                                                                                                                                                                                                                                                                                                                                                                                                                                                                                                                                                                                                                                                                                                                                                                                                                                                                                                                                                                                                                                                                                                                                                                                                                                                                                                                                                                                                                                                                                                                                                                                                                                                                                                                                                                                                                                                                                                                                                                                                                                                                                                                                                                                                                                                                                                                                                                                                                                                                                                                                                                                                                                                                                                                                                                                                                                                                                                                                                                                                                                                                                                                                                                                                                                                                                                                                                                                                                                                                                                                                                                                                                                                                                                                                                                                                                                                                                                                                                                                                                                                                                                                                                                                                                                                                                                                                                                                                                                                                                                                                                                                                                                                                                                                                                                                                                                                                                                                                                                                                                                                                                                                                                                                                                                                                                                            | 1630 | 1640 | 1650 | 1660 | 1670 | 1680 | 1690 |  |
|--------------|-------------------------------------------------------------------------------------------------------------------------------------------------------------------------------------------------------------------------------------------------------------------------------------------------------------------------------------------------------------------------------------------------------------------------------------------------------------------------------------------------------------------------------------------------------------------------------------------------------------------------------------------------------------------------------------------------------------------------------------------------------------------------------------------------------------------------------------------------------------------------------------------------------------------------------------------------------------------------------------------------------------------------------------------------------------------------------------------------------------------------------------------------------------------------------------------------------------------------------------------------------------------------------------------------------------------------------------------------------------------------------------------------------------------------------------------------------------------------------------------------------------------------------------------------------------------------------------------------------------------------------------------------------------------------------------------------------------------------------------------------------------------------------------------------------------------------------------------------------------------------------------------------------------------------------------------------------------------------------------------------------------------------------------------------------------------------------------------------------------------------------------------------------------------------------------------------------------------------------------------------------------------------------------------------------------------------------------------------------------------------------------------------------------------------------------------------------------------------------------------------------------------------------------------------------------------------------------------------------------------------------------------------------------------------------------------------------------------------------------------------------------------------------------------------------------------------------------------------------------------------------------------------------------------------------------------------------------------------------------------------------------------------------------------------------------------------------------------------------------------------------------------------------------------------------------------------------------------------------------------------------------------------------------------------------------------------------------------------------------------------------------------------------------------------------------------------------------------------------------------------------------------------------------------------------------------------------------------------------------------------------------------------------------------------------------------------------------------------------------------------------------------------------------------------------------------------------------------------------------------------------------------------------------------------------------------------------------------------------------------------------------------------------------------------------------------------------------------------------------------------------------------------------------------------------------------------------------------------------------------------------------------------------------------------------------------------------------------------------------------------------------------------------------------------------------------------------------------------------------------------------------------------------------------------------------------------------------------------------------------------------------------------------------------------------------------------------------------------------------------------------------------------------------------------------------------------------------------------------------------------------------------------------------------------------------------------------------------------------------------------------------------------------------------------------------------------------------------------------------------------------------------------------------------------------------------------------------------------------------------------------------------------------------------------------------------------------------------------------------------------------------------------------------------------------------------------------------------------------------------------------------------------------------------------------------------------------------------------------------------------------------------------------------------------------------------------------------------------------------------------------------------------------------------------------------------------------------------------------------------------------------------------------------------------------------------------------------------------------------------------------------------------------------------------------------------------------------------------------------------------------------------------------------------------------------------------------------------------------------------------------------------------------------------------------------------------------------------------------------------------------------------------------------------------------------------------------------------------------------------------------------------------------------------------------------------------------------------------------------------------------------------------------------------------------------------------------------------------------------------------------------------------------------------------------------------------------------------------------------------------------------------------------------------------------------------------------------------------------------------------------------------------------------------------------------------------------------------------------------------------------------------------------------------------------------------------------------------------------------------------------------------------------------------------------------------------------------------------------------------------------------------------------------------------------------------------------------------------------------------------------------------------------------------------------------------------------------------------------------------------------------------------------------------------------------------------------------------------------------------------------------------------------------------------------------------------------------------------------------------------------------------------------------------------------------------------------------------------------------------------------------------------------------------------------------------------------------------------------------------------------------------------------------------------------------------------------------------------------------------------------------------------------------------------------------------------------------------------------------------------------------------------------------------------------------------------------------------------------------------------------------------------------------------------------------------------------------------------------------------------------------------------------------------------------------------------------------------------------------------------------------------------------------------------------------------------------------------------------------------------------------------------------------------------------------------------------------------------------------------------------------------------------------------------------------------------------------------------------------------------------------------------------------------------------------------------------------------------------------------------------------------------------------------------------------------------------------------------------------------------------------------------------------------------------------------------------------------------------------------------------------------------------------------------------------------------------------------------------------------------------------------------------------------------------------------------------------------------------------------------------------------------------------------------------------------------------------------------------------------------------------------------------------------------------------------------------------------------------------------------------------------------------------------------------------------------------------------------------------------------------------------------------------------------------------------------------------------------------------------------------------------------------------------------------------------------------------------------------------------------------------------------------------------------------------------------------------------------------------------------------------------------------------------------------------------------------------------------------------------------------------------------------------------------------------------------------------------------------------------------------------------------------------------------------------------------------------------------------------------------------------------------------------------------------------------------------------------------------------------------------------------------------------------------------------------------------------------------------------------------------------------------------------------------------------------------------------------------------------------------------------------------------------------------------------------------------------------------------------------------------------------------------------------------------------------------------------------------------------------------------------------------------------------------------------------------------------------------------------------------------------------------------------------------------------------------------------------------------------------------------------------------------------------------------------------------------------------------------------------------------------------------------------------------------------------------------------------------------------------------------------------------------------------------------------------------------------------------------------------------------------------------------------------------------------------------------------------------------------------------------------------------------------------------------------------------------------------------------------------------------------------------------------------------------------------------------------------------------------------------------------------------------------------------------------------------------------------------------------------------------------------------------------------------------------------------------------------------------------------------------------------------------------------------|------|------|------|------|------|------|------|--|
| conservation | ●●●●●●●●●●●●●●●●●●●●●●●●●●●●●●●●●●●●●●●●●●●●●●●●●●●●●●●●●●●●●●●●●●●●●●●●●●●●●●●●●●●●●●●●●●●●●●●●●●●●●●●●●●●●●●●●●●●●●●●●●●●●●●●●●●●●●●●●●●●●●●●●●●●●●●●●●●●●●●●●●●●●●●●●●●●●●●●●●●●●●●●●●●●●●●●●●●●●●●●●●●●●●●●●●●●●●●●●●●●●●●●●●●●●●●●●●●●●●●●●●●●●●●●●●●●●●●●●●●●●●●●●●●●●●●●●●●●●●●●●●●●●●●●●●●●●●●●●●●●●●●●●●●●●●●●●●●●●●●●●●●●●●●●●●●●●●●●●●●●●●●●●●●●●●●●●●●●●●●●●●●●●●●●●●●●●●●●●●●●●●●●●●●●●●●●●●●●●●●●●●●●●●●●●●●●●●●●●●●●●●●●●●●●●●●●●●●●●●●●●●●●●●●●●●●●●●●●●●●●●●●●●●●●●●●●●●●●●●●●●●●●●●●●●●●●●●●●●●●●●●●●●●●●●●●●●●●●●●●●●●●●●●●●●●●●●●●●●●●●●●●●●●●●●●●●●●●●●●●●●●●●●●●●●●●●●●●●●●●●●●●●●●●●●●●●●●●●●●●●●●●●●●●●●●●●●●●●●●●●●●●●●●●●●●●●●●●●●●●●●●●●●●●●●●●●●●●●●●●●●●●●●●●●●●●●●●●●●●●●●●●●●●●●●●●●●●●●●●●●●●●●●●●●●●●●●●●●●●●●●●●●●●●●●●●●●●●●●●●●●●●●●●●●●●●●●●●●●●●●●●●●●●●●●●●●●●●●●●●●●●●●●●●●●●●●●●●●●●●●●●●●●●●●●●●●●●●●●●●●●●●●●●●●●●●●●●●●●●●●●●●●●●●●●●●●●●●●●●●●●●●●●●●●●●●●●●●●●●●●●●●●●●●●●●●●●●●●●●●●●●●●●●●●●●●●●●●●●●●●●●●●●●●●●●●●●●●●●●●●●●●●●●●●●●●●●●●●●●●●●●●●●●●●●●●●●●●●●●●●●●●●●●●●●●●●●●●●●●●●●●●●●●●●●●●●●●●●●●●●●●●●●●●●●●●●●●●●●●●●●●●●●●●●●●●●●●●●●●●●●●●●●●●●●●●●●●●●●●●●●●●●●●●●●●●●●●●●●●●●●●●●●●●●●●●●●●●●●●●●●●●●●●●●●●●●●●●●●●●●●●●●●●●●●●●●●●●●●●●●●●●●●●●●●●●●●●●●●●●●●●●●●●●●●●●●●●●●●●●●●●●●●●●●●●●●●●●●●●●●●●●●●●●●●●●●●●●●●●●●●●●●●●●●●●●●●●●●●●●●●●●●●●●●●●●●●●●●●●●●●●●●●●●●●●●●●●●●●●●●●●●●●●●●●●●●●●●●●●●●●●●●●●●●●●●●●●●●●●●●●●●●●●●●●●●●●●●●●●●●●●●●●●●●●●●●●●●●●●●●●●●●●●●●●●●●●●●●●●●●●●●●●●●●●●●●●●●●●●●●●●●●●●●●●●●●●●●●●●●●●●●●●●●●●●●●●●●●●●●●●●●●●●●●●●●●●●●●●●●●●●●●●●●●●●●●●●●●●●●●●●●●●●●●●●●●●●●●●●●●●●●●●●●●●●●●●●●●●●●●●●●●●●●●●●●●●●●●●●●●●●●●●●●●●●●●●●●●●●●●●●●●●●●●●●●●●●●●●●●●●●●●●●●●●●●●●●●●●●●●●●●●●●●●●●●●●●●●●●●●●●●●●●●●●●●●●●●●●●●●●●●●●●●●●●●●●●●●●●●●●●●●●●●●●●●●●●●●●●●●●●●●●●●●●●●●●●●●●●●●●●●●●●●●●●●●●●●●●●●●●●●●●●●●●●●●●●●●●●●●●●●●●●●●●●●●●●●●●●●●●●●●●●●●●●●●●●●●●●●●●●●●●●●●●●●●●●●●●●●●●●●●●●●●●●●●●●●●●●●●●●●●●●●●●●●●●●●●●●●●●●●●●●●●●●●●●●●●●●●●●●●●●●●●●●●●●●●●●●●●●●●●●●●●●●●●●●●●●●●●●●●●●●●●●●●●●●●●●●●●●●●●●●●●●●●●●●●●●●●●●●●●●●●●●●●●●●●●●●●●●●●●●●●●●●●●●●●●●●●●●●●●●●●●●●●●●●●●●●●●●●●●●●●●●●●●●●●●●●●●●●●●●●●●●●●●●●●●●●●●●●●●●●●●●●●●●●●●●●●●●●●●●●●●●●●●●●●●●●●●●●●●●●●●●●●●●●●●●●●●●●●●●●●●●●●●●●●●●●●●●●●●●●●●●●●●●●●●●●●●●●●●●●●●●●●●●●●●●●●●●●●●●●●●●●●●●●●●●●●●●●●●●●●●●●●●●●●●●●●●●●●●●●●●●●●●●●●●●●●●●●●●●●●●●●●●●●●●●●●●●●●●●●●●●●●●●●●●●●●●●●●●●●●●●●●●●●●●●●●●●●●●●●●●●●●●●●●●●●●●●●●●●●●●●●●●●●●●●●●●●●●●●●●●●●●●●●●●●●●●●●●●●●●●●●●●●●●●●●●●●●●●●●●●●●●●●●●●●●●●●●●●●●●●●●●●●●●●●●●●●●●●●●●●●●●●●●●●●●●●●●●●●●●●●●●●●●●●●●●●●●●●●●●●●●●●●●●●●●●●●●●●●●●●●●●●●●●●●●●●●●●●●●●●●●●●●●●●●●●●●●●●●●●●●●●●●●●●●●●●●●●●●●●●●●●●●●●●●●●●●●●●●●●●●●●●●●●●●●●●●●●●●●●●●●●●●●●●●●●●●●●●●●●●●●●●●●●●●●●●●●●●●●●●●●●●●●●●●●●●●●●●●●●●●●●●●●●●●●●●●●●●●●●●●●●●●●●●●●●●●●●●●●●●●●●●●●●●●●●●●●●●●●●●●●●●●●●●●●●●●●●●●●●●●●●●●●●●●●●●●●●●●●●●●●●●●●●●●●●●●●●●●●●●●●●●●●●●●●●●●●●●●●●●●●●●●●●●●●●●●●●●●●●●●●●●●●●●●●●●●●●●●●●●●●●●●●●●●●●●●●●●●●●●●●●●●●●●●●●●●●●●●●●●●●●●●●●●●●●●●●●●●●●●●●●●●●●●●●●●●●●●●●●●●●●●●●●●●●●●●●●●●●●●●●●●●●●●●●●●●●●●●●●●●●●●●●●●●●●●●●●●●●●●●●●●●●●●●●●●●●●●●●●●●●●●●●●●●●●●●●●●●●●●●●●●●●●●●●●●●●●●●●●●●●●●●●●●●●●●●●●●●●●●●●●●●●●●●●●●●●●●●●●●●●●●●●●●●●●●●●●●●●●●●●●●●●●●●●●●●●●●●●●●●●●●●●●●●●●●●●●●●●●●●●●●●●●●●●●●●●●●●●●●●●●●●●●●●●●●●●●●●●●●●●●●●●●●●●●●●●●●●●●●●●●●●●●●●●●●●●●●●●●●●●●●●●●●●●●●●●●●●●●●●●●●●●●●●●●●●●●●●●●●●●●●●●●●●●●●●●●●●●●●●●●●●●●●●●●●●●●●●●●●●●●●●●●●●●●●●●●●●●●●●●●●●●●●●●●●●●●●●●●●●●●●●●●●●●●●●●●●●●●●●●●●●●●●●●●●●●●●●●●●●●●●●●●●●●●●●●●●●●●●●●●●●●●●●●●●●●●●●●●●●●●●●●●●●●●●●●●●●●●●●●●●●●●●●●●●●●●●●●●●●●●●●●●●●●●●●●●●●●●●●●●●●●●●●●●●●●●●●●●●●●●●●●●●●●●●●●●●●●●●●●●●●●●●●●●●●●●●●●●●●●●●●●●●●●●●●●●●●●●●●●●●●●●●●●●●●●●●●●●●●●●●●●●●●●●●●●●●●●●●●●●●●●●●●●●●●●●●●●●●●●●●●●●●●●●●●●●●●●●●●●●●●●●●●●●●●●●●●●●●●●●●●●●●●●●●●●●●●●●●●●●●●●●●●●●●●●●●●●●●●●●●●●●●●●●●●●●●●●●●●●●●●●●●●●●●●●●●●●●●●●●●●●●●●●●●●●●●●●●●●●●●●●●●●●●●●●●●●●●●●●●●●●●●●●●●●●●●●●●●●●●●●●●●●●●●●●●●●●●●●●●●●●●●●●●●●●●●●●●●●●●●●●●●●●●●●●●●●●●●●●●●●●●●●●●●●●●●●●●●●●●●●●●●●●●●●●●●●●●●●●●●●●●●●●●●●●●●●●●●●●●●●●●●●●●●●●●●●●●●●●●●●●●●●●●●●●●●●●●●●●●●●●●●●●●●●●●●●●●●●●●●●●●●●●●●●●●●●●●●●●●●●●●●●●●●●●●●●●●●●●●●●●●●●●●●●●●●●●●●●●●●●●●●●●●●●●●●●●●●●●●●●●●●●●●●●●●●●●●●●●●●●●●●●●●●●●●●●●●●●●●●●●●●●●●●●●●●●●●●●●●●●●●●●●●●●●●●●●●●●●●●●●●●●●●●●●●●●●●●●●●●●●●●●●●●●●●●●●●●●●●●●●●●●●●●●●●●●●●●●●●●●●●●●●●●●●●●●●●●●●●●●●●●●●●●●●●●●●●●●●●●●●●●●●●●●●●●●●●●●●●●●●●●●●●●●●●●●●●●●●●●●●●●●●●●●●●●●●●●●●●●●●●●●●●●●●●●●●●●●●●●●●●●●●●●●●●●●●●●●●●●●●●●●●●●●●●●●●●●●●●●●●●●●●●●●●●●●●●●●●●●●●●●●●●●●●●●●●●●●●●●●●●●●●●●●●●●●●●●●●●●●●●●●●●●●●●●●●●●●●●●●●●●●●●●●●●●●●●●●●●●●●●●●●●●●●●●●●●●●●●●●●●●●●●●●●●●●●●●●●●●●●●●●●●●●●●●●●●●●●●●●●●●●●●●●●●●●●●●●●●●●●●●●●●●●●●●●●●●●●●●●●●●●●●●●●●●●●●●●●●●●●●●●●●●●●●●●●●●●●●●●●●●●●●●●●●●●●●●●●●●●●●●●●●●●●●●●●●●●●●●●●●●●●●●●●●●●●●●●●●●●●●●●●●●●●●●●●●●●●●●●●●●●●●●●●●●●●●●●●●●●●●●●●●●●●●●●●●●●●●●●●●●●●●●●●●●●●●●●●●●●●●●●●●●●●●●●●●●●●●●●●●●●●●●●●●●●●●●●●●●●●●●●●●●●●●●●●●●●●●●●●●●●●●●●●●●●●●●●●●●●●●●●●●●●●●●●●●●●●●●●●●●●●●●●●●●●●●●●●●●●●●●●●●●●●●●●●●●●●●●●●●●●●●●●●●●●●●●●●●●●●●●●●●●●●●●●●●●●●●●●●●●●●●●●●●●●●●●●●●●●●●●●●●●●●●●●●●●●●●●●●●●●●●●●●●●●●●●●●●●●●●●●●●●●●●●●●●●●●●●●●●●●●●●●●●●●●●●●●●●●●●●●●●●●●●●●●●●●●●●●●●●●●●●●●●●●●●●●●●●●●●●●●●●●●●●●●●●●●●●●●●●●●●●●●●●●●●●●●●●●●●●●●●●●●●●●●●●●●●●●●●●●●●●●●●●●●●●●●●●●●●●●●●●●●●●●●●●●●●●●●●●●●●●●●●●●●●●●●●●●●●●●●●●●●●●●●●●●●●●●●●●●●●●●●●●●●●●●●●●●●●●●●●●●●●●●●●●●●●●●●●●●●●●●●●●●●●●●●●●●●●●●●●●●●●●●●●●●●●●●●●●●●●●●●●●●●●●●●●●●●●●●●●●●●●●●●●●●●●●●●●●●●●●●●●●●●●●●●●●●●●●●●●●●●●●●●●●●●●●●●●●●●●●●●●●●●●●●●●●●●●●●●●●●●●●●●●●●●●●●●●●●●●●●●●●●●●●●●●●●●●●●●●●●●●●●●●●●●●●●●●●●●●●●●●●●●●●●●●●●●●●●●●●●●●●●●●●●●●●●●●●●●●●●●●●●●●●●●●●●●●●●●●●●●●●●●●●●●●●●●●●●●●●●●●●●●●●●●●●●●●●●●●●●●●●●●●●●●●●●●●●●●●●●●●●●●●●●●●●●●●●●●●●●●●●●●●●●●●●●●●●●●●●●●●●●●●●●●●●●●●●●●●●●●●●●●●●●●●●●●●●●●●●●●●●●●●●●●●●●●●●●●●●●●●●●●●●●●●●●●●●●●●●●●●●●●●●●●●●●●●●●●●●●●●●●●●●●●●●●●●●●●●●●●●●●●●●●●●●●●●●●●●●●●●●●●●●●●●●●●●●●●●●●●●●●●●●●●●●●●●●●●●●●●●●●●●●●●●●●●●●●●●●●●●●●●●●●●●●●●●●●●●●●●●●●●●●●●●●●●●●●●●●●●●●●●●●●●●●●●●●●●●●●●●●●●●●●●●●●●●●●●●●●●●●●●●●●●●●●●●●●●●●●●●●●●●●●●●●●●●●●●●●●●●●●●●●●●●●●●●●●●●●●●●●●●●●●●●●●●●●●●●●●●●●●●●●●●●●●●●●●●●●●●●●●●●●●●●●●●●●●●●●●●●●●●●●●●●●●●●●●●●●●●●●●●●●●●●●●●●●●●●●●●●●●●●●●●●●●●●●●●●●●●●●●●●●●●●●●●●●●●●●●●●●●●●●●●●●●●●●●●●●●●●●●●●●●●●●●●●●●●●●●●●●●●●●●●●●●●●●●●●●●●●●●●●●●●●●●●●●●●●●●●●●●●●●●●●●●●●●●●●●●●●●●●●●●●●●●●●●●●●●●●●●●●●●●●●●●●●●●●●●●●●●●●●●●●●●●●●●●●●●●●●●●●●●●●●●●●●●●●●●●●●●●●●●●●●●●●●●●●●●●●●●●●●●●●●●●●●●●●●●●●●●●●●●●●●●●●●●●●●●●●●●●●●●●●●●●●●●●●●●●●●●●●●●●●●●●●●●●●●●●●●●●●●●●●●●●●●●●●●●●●●●●●●●●●●●●●●●●●●●●●●●●●●●●●●●●●●●●●●●●●●●●●●●●●●●●●●●●●●●●●●●●●●●●●●●●●●●●●●●●●●●●●●●●●●●●●●●●●●●●●●●●●●●●●●●●●●●●●●●●●●●●●●●●●●●●●●●●●●●●●●●●●●●●●●●●●●●●●●●●●●●●●●●●●●●●●●●●●●●●●●●●●●●●●●●●●●●●●●●●●●●●●●●●●●●●●●●●●●●●●●●●●●●●●●●●●●●●●●●●●●●●●●●●●●●●●●●●●●●●●●●●●●●●●●●●●●●●●●●●●●●●●●●●●●●●●●●●●●●●●●●●●●●●●●●●●●●●●●●●●●●●●●●●●●●●●●●●●●●●●●●●●●●●●●●●●●●●●●●●●●●●●●●●●●●●●●●●●●●●●●●●●●●●●●●●●●●●●●●●●●●●●●●●●●●●●●●●●●●●●●●●●●●●●●●●●●●●●●●●●●●●●●●●●●●●●●●●●●●●●●●●●●●●●●●●●●●●●●●●●●●●●●●●●●●●●●●●●●●●●●●●●●●●●●●●●●●●●●●●●●●●●●●●●●●●●●●●●●●●●●●●●●●●●●●●●●●●●●●●●●●●●●●●●●●●●●●●●●●●●●●●●●●●●●●●●●●●●●●●●●●●●●●●●●●●●●●●●●●●●●●●●●●●●●●●●●●●●●●●●●●●●●●●●●●●●●●●●●●●●●●●●●●●●●●●●●●●●●●●●●●●●●●●●●●●●●●●●●●●●●●●●●●●●●●●●●●●●●●●●●●●●●●●●●●●●●●●●●●●●●●●●●●●●●●●●●●●●●●●●●●●●●●●●●●●●●●●●●●●●●●●●●●●●●●●●●●●●●●●●●●●●●●●●●●●●●●●●●●●●●●●●●●●●●●●●●●●●●●●●●●●●●●●●●●●●●●●●●●●●●●●●●●●●●●●●●●●●●●●●●●●●●●●●●●●●●●●●●●●●●●●●●●●●●●●●●●●●●●●●●●●●●●●●●●●●●●●●●●●●●●●●●●●●●●●●●●●●●●●●●●●●●●●●●●●●●●●●●●●●●●●●●●●●●●●●●●●●●●●●●●●●●●●●●●●●●●●●●●●●●●●●●●●●●●●●●●●●●●●●●●●●●●●●●●●●●●●●●●●●●●●●●●●●●●●●●●●●●●●●●●●●●●●●●●●●●●●●●●●●●●●●●●●●●●●●●●●●●●●●●●●●●●●●●●●●●●●●●●●●●●●●●●●●●●●●●●●●●●●●●●●●●●●●●●●●●●●●●●●●●●●●●●●●●●●●●●●●●●●●●●●●●●●●●●●●●●●●●●●●●●●●●●●●●●●●●●●●●●●●●●●●●●●●●●●●●●●●●●●●●●●●●●●●●●●●●●●●●●●●●●●●●●●●●●●●●●●●●●●●●●●●●●●●●●●●●●●●●●●●●●●●●●●●●●●●●●●●●●●●●●●●●●●●●●●●●●●●●●●●●●●●●●●●●●●●●●●●●●●●●●●●●●●●●●●●●●●●●●●●●●●●●●●●●●●●●●●●●●●●●●●●●●●●●●●●●●●●●●●●●●●●●●●●●●●●●●●●●●●●●●●●●●●●●●●●●●●●●●●●●●●●●●●●●●●●●●●●●●●●●●●●●●●●●●●●●●●●●●●●●●●●●●●●●●●●●●●●●●●●●●●●●●●●●●●●●●●●●●●●●●●●●●●●●●●●●●●●●●●●●●●●●●●●●●●●●●●●●●●●●●●●●●●●●●●●●●●●●●●●●●●●●●●●●●●●●●●●●●●●●●●●●●●●●●●●●●●●●●●●●●●●●●●●●●●●●●●●●●●●●●●●●●●●●●●●●●●●●●●●●●●●●●●●●●●●●●●●●●●●●●●●●●●●●●●●●●●●●●●●●●●●●●●●●●●●●●●●●●●●●●●●●●●●●●●●●●●●●●●●●●●●●●●●●●●●●●●●●●●●●●●●●●●●●●●●●●●●●●●●●●●●●●●●●●●●●●●●●●●●●●●●●●●●●●●●●●●●●●●●●●●●●●●●●●●●●●●●●●●●●●●●●●●●●●●●●●●●●●●●●●●●●●●●●●●●●●●●●●●●●●●●●●●●●●●●●●●●●●●●●●●●●●●●●●●●●●●●●●●●●●●●●●●●●●●●●●●●●●●●●●●●●●●●●●●●●●●●●●●●●●●●●●●●●●●●●●●●●●●●●●●●●●●●●●●●●●●●●●●●●●●●●●●●●●●●●●●●●●●●●●●●●●●●●●●●●●●●●●●●●●●●●●●●●●●●●●●●●●●●●●●●●●●●●●●●●●●●●●●●●●●●●●●●●●●●●●●●●●●●●●●●●●●●●●●●●●●●●●●●●●●●●●●●●●●●●●●●●●●●●●●●●●●●●●●●●●●●●●●●●●●●●●●●●●●●●●●●●●●●●●●●●●●●●●●●●●●●●●●●●●●●●●●●●●●●●●●●●●●●●●●●●●●●●●●●●●●●●●●●●●●●●●●●●●●●●●●●●●●●●●●●●●●●●●●●●●●●●●●●●●●●●●●●●●●●●●●●●●●●●●●●●●●●●●●●●●●●●●●●●●●●●●●●●●●●●●●●●●●●●●●●●●●●●●●●●●●●●●●●●●●●●●●●●●●●●●●●●●●●●●●●●●●●●●●●●●●●●●●●●●●●●●●●●●●●●●●●●●●●●●●●●●●●●●●●●●●●●●●●●●●●●●●●●●●●●●●●●●●●●●●●●●●●●●●●●●●●●●●●●●●●●●●●●●●●●●●●●●●●●●●●●●●●●●●●●●●●●●●●●●●●●●●●●●●●●●●●●●●●●●●●●●●●●●●●●●●●●●●●●●●●●●●●●●●●●●●●●●●●●●●●●●●●●●●●●●●●●●●●●●●●●●●●●●●●●●●●●●●●●●●●●●●●●●●●●●●●●●●●●●●●●●●●●●●●●●●●●●●●●●●●●●●●●●●●●●●●●●●●●●●●●●●●●●●●●●●●●●●●●●●●●●●●●●●●●●●●●●●●●●●●●●●●●●●●●●●●●●●●●●●●●●●●●●●●●●●●●●●●●●●●●●●●●●●●●●●●●●●●●●●●●●●●●●●●●●●●●●●●●●●●●●●●●●●●●●●●●●●●●●●●●●●●●●●●●●●●●●●●●●●●●●●●●●●●●●●●●●●●●●●●●●●●●●●●●●●●●●●●●●●●●●●●●●●●●●●●●●●●●●●●●●●●●●●●●●●●●●●●●●●●●●●●●●●●●●●●●●●●●●●●●●●●●●●●●●●●●●●●●●●●●●●●●●●●●●●●●●●●●●●●●●●●●●●●●●●●●●●●●●●●●●●●●●●●●●●●●●●●●●●●●●●●●●●●●●●●●●●●●●●●●●●●●●●●●●●●●●●●●●●●●●●●●●●●●●●●●●●●●●●●●●●●●●●●●●●●●●●●●●●●●●●●●●●●●●●●●●●●●●●●●●●●●●●●●●●●●●●●●●●●●●●●●●●●●●●●●●●●●●●●●●●●●●●●●●●●●●●●●●●●●●●●●●●●●●●●●●●●●●●●●●●●●●●●●●●●●●●●●●●●●●●●●●●●●●●●●●●●●●●●●●●●●●●●●●●●●●●●●●●●●●●●●●●●●●●●●●●●●●●●●●●●●●●●●●●●●●●●●●●●●●●●●●●●●●●●●●●●●●●●●●●●●●●●●●●●●●●●●●●●●●●●●●●●●●●●●●●●●●●●●●●●●●●●●●●●●●●●●●●●●●●●●●●●●●●●●●●●●●●●●●●●●●●●●●●●●●●●●●●●●●●●●●●●●●●●●●●●●●●●●●●●●●●●●●●●●●●●●●●●●●●●●●●●●●●●●●●●●●●●●●●●●●●●●●●●●●●●●●●●●●●●●●●●●●●●●●●●●●●●●●●●●●●●●●●●●●●●●●●●●●●●●●●●●●●●●●●●●●●●●●●●●●●●●●●●●●●●●●●●●●●●●●●●●●●●●●●●●●●●●●●●●●●●●●●●●●●●●●●●●●●●●●●●●●●●●●●●●●●●●●●●●●●●●●●●●●●●●●●●●●●●●●●●●●●●●●●●●●●●●●●●●●●●●●●●●●●●●●●●●●●●●●●●●●●●●●●●●●●●●●●●●●●●●●●●●●●●●●●●●●●●●●●●●●●●●●●●●●●●●●●●●●●●●●●●●●●●●●●●●●●●●●●●●●●●●●●●●●●●●●●●●●●●●●●●●●●●●●●●●●●●●●●●●●●●●●●●●●●●●●●●●●●●●●●●●●●●●●●●●●●●●●●●●●●●●●●●●●●●●●●●●●●●●●●●●●●●●●●●●●●●●●●●●●●●●●●●●●●●●●●●●●●●●●●●●●●●●●●●●●●●●●●●●●●●●●●●●●●●●●●●●●●●●●●●●●●●●●●●●●●●●●●●●●●●●●●●●●●●●●●●●●●●●●●●●●●●●●●●●●●●●●●●●●●●●●●●●●●●●●●●●●●●●●●●●●●●●●●●●●●●●●●●●●●●●●●●●●●●●●●●●●●●●●●●●●●●●●●●●●●●●●●●●●●●●●●●●●●●●●●●●●●●●●●●●●●●●●●●●●●●●●●●●●●●●●●●●●●●●●●●●●●●●●●●●●●●●●●●●●●●●●●●●●●●●●●●●●●●●●●●●●●●●●●●●●●●●●●●●●●●●●●●●●●●●●●●●●●●●●●●●●●●●●●●●●●●●●●●●●●●●●●●●●●●●●●●●●●●●●●●●●●●●●●●●●●●●●●●●●●●●●●●●●●●●●●●●●●●●●●●●●●●●●●●●●●●●●●●●●●●●●●●●●●●●●●●●●●●●●●●●●●●●●●●●●●●●●●●●●●●●●●●●●●●●●●●●●●●●●●●●●●●●●●●●●●●●●●●●●●●●●●●●●●●●●●●●●●●●●●●●●●●●●●●●●●●●●●●●●●●●●●●●●●●●●●●●●●●●●●●●●●●●●●●●●●●●●●●●●●●●●●●●●●●●●●●●●●●●●●●●●●●●●●●●●●●●●●●●●●●●●●●●●●●●●●●●●●●●●●●●●●●●●●●●●●●●●●●●●●●●●●●●●●●●●●●●●●●●●●●●●●●●●●●●●●●●●●●●●●●●●●●●●●●●●●●●●●●●●●●●●●●●●●●●●●●●●●●●●●●●●●●●●●●●●●●●●●●●●●●●●●●●●●●●●●●●●●●●●●●●●●●●●●●●●●●●●●●●●●●●●●●●●●●●●●●●●●●●●●●●●●●●●●●●●●●●●●●●●●●●●●●●●●●●●●●●●●●●●●●●●●●●●●●●●●●●●●●●●●●●●●●●●●●●●●●●●●●●●●●●●●●●●●●●●●●●●●●●●●●●●●●●●●●●●●●●●●●●●●●●●●●●●●●●●●●●●●●●●●●●●●●●●●●●●●●●●●●●●●●●●●●●●●●●●●●●●●●●●●●●●●●●●●●●●●●●●●●●●●●●●●●●●●●●●●●●●●●●●●●●●●●●●●●●●●●●●●●●●●●●●●●●●●●●●●●●●●●●●●●●●●●●●●●●●●●●●●●●●●●●●●●●●●●●●●●●●●●●●●●●●●●●●●●●●●●●●●●●●●●●●●●●●●●●●●●●●●●●●●●●●●●●●●●●●●●●●●●●●●●●●●●●●●●●●●●●●●●●●●●●●●●●●●●●●●●●●●●●●●●●●●●●●●●●●●●●●●●●●●●●●●●●●●●●●●●●●●●●●●●●●●●●●●●●●●●●●●●●●●●●●●●●●●●●●●●●●●●●●●●●●●●●●●●●●●●●●●●●●●●●●●●●●●●●●●●●●●●●●●●●●●●●●●●●●●●●●●●●●●●●●●●●●●●●●●●●●●●●●●●●●●●●●●●●●●●●●●●●●●●●●●●●●●●●●●●●●●●●●●●●●●●●●●●●●●●●●●●●●●●●●●●●●●●●●●●●●●●●●●●●●●●●●●●●●●●●●●●●●●●●●●●●●●●●●●●●●●●●●●●●●●●●●●●●●●●●●●●●●●●●●●●●●●●●●●●●●●●●●●●●●●●●●●●●●●●●●●●●●●●●●●●●●●●●●●●●●●●●●●●●●●●●●●●●●●●●●●●●●●●●●●●●●●●●●●●●●●●●●●●●●●●●●●●●●●●●●●●●●●●●●●●●●●●●●●●●●●●●●●●●●●●●●●●●●●●●●●●●●●●●●●●●●●●●●●●●●●●●●●●●●●●●●●●●●●●●●●●●●●●●●●●●●●●●●●●●●●●●●●●●●●●●●●●●●●●●●●●●●●●●●●●●●●●●●●●●●●●●●●●●●●●●●●●●●●●●●●●●●●●●●●●●●●●●●●●●●●●●●●●●●●●●●●●●●●●●●●●●●●●●●●●●●●●●●●●●●●●●●●●●●●●●●●●●●●●●●●●●●●●●●●●●●●●●●●●●●●●●●●●●●●●●●●●●●●●●●●●●●●●●●●●●●●●●●●●●●●●●● |      |      |      |      |      |      |      |  |

|              | 1700                                                                                                                                                                                                                                                                                                                                                                                                                                                                                                                                                                                                                                                                                                                                                                                                                                                                                                                                                                                                                                                                                                                                                                                                                                                                                                                                                                                                                                                                                                                                                                                                                                                                                                                                                                                                                                                                                                                                                                                                                                                                                                                                                                                                                                                                                                                                                                                                                                                                                                                                                                                                                                                                                                                                                                                                                                                                                                                                                                                                                                                                                                                                                                                                                                                                                                                                                                                                                                                                                                                                                                                                                                                                                                                                                                                                                                                                                                                                                                                                                                                                                                                                                                                                                                                                                                                                                                                                                                                                                                                                                                                                                                                                                                                                                                                                                                                                                                                                                                                                                                                                                                                                                                                                                                                                                                                                                                                                                                                                                                                                                                                                                                                                                                                                                                                                                                                                                                                                                                                                                                                                                                                                                                                                                                                                                                                                                                                                                                                                                                                                                                                                                                                                                                                                                                                                                                                                                                                                                                                                                                                                                                                                                                                                                                                                                                                                                                                                                                                                                                                                                                                                                                                                                                                                                                                                                                                                                                                                                                                                                                                                                                                                                                                                                                                                                                                                                                                                                                                                                                                                                                                                                                                                                                                                                                                                                                                                                                                                                                                                                                                                                                                                                                                                                                                                                                                                                                                                                                                                                                                                                                                                                                                                                                                                                                                                                                                                                                                                                                                                                                                                                                                                                                                                                                                                                                                                                                                                                                                                                                                                                                                                                                                                                                                                                                                                                                                                                                                                                                                                                                                                                                                                                                                                                                                                                                                                                                                                                                                                                                                                                                                                                                                                                                                                                                                                                                                                                                                                                                                                                                                                                                                                                                                                                                                                                                                                                                                                                                                                                                                                                                                                                                                                                                                                                                                            | 1710 | 1720 | 1730 | 1740 | 1750 | 1760 | 1770 |  |
|--------------|-------------------------------------------------------------------------------------------------------------------------------------------------------------------------------------------------------------------------------------------------------------------------------------------------------------------------------------------------------------------------------------------------------------------------------------------------------------------------------------------------------------------------------------------------------------------------------------------------------------------------------------------------------------------------------------------------------------------------------------------------------------------------------------------------------------------------------------------------------------------------------------------------------------------------------------------------------------------------------------------------------------------------------------------------------------------------------------------------------------------------------------------------------------------------------------------------------------------------------------------------------------------------------------------------------------------------------------------------------------------------------------------------------------------------------------------------------------------------------------------------------------------------------------------------------------------------------------------------------------------------------------------------------------------------------------------------------------------------------------------------------------------------------------------------------------------------------------------------------------------------------------------------------------------------------------------------------------------------------------------------------------------------------------------------------------------------------------------------------------------------------------------------------------------------------------------------------------------------------------------------------------------------------------------------------------------------------------------------------------------------------------------------------------------------------------------------------------------------------------------------------------------------------------------------------------------------------------------------------------------------------------------------------------------------------------------------------------------------------------------------------------------------------------------------------------------------------------------------------------------------------------------------------------------------------------------------------------------------------------------------------------------------------------------------------------------------------------------------------------------------------------------------------------------------------------------------------------------------------------------------------------------------------------------------------------------------------------------------------------------------------------------------------------------------------------------------------------------------------------------------------------------------------------------------------------------------------------------------------------------------------------------------------------------------------------------------------------------------------------------------------------------------------------------------------------------------------------------------------------------------------------------------------------------------------------------------------------------------------------------------------------------------------------------------------------------------------------------------------------------------------------------------------------------------------------------------------------------------------------------------------------------------------------------------------------------------------------------------------------------------------------------------------------------------------------------------------------------------------------------------------------------------------------------------------------------------------------------------------------------------------------------------------------------------------------------------------------------------------------------------------------------------------------------------------------------------------------------------------------------------------------------------------------------------------------------------------------------------------------------------------------------------------------------------------------------------------------------------------------------------------------------------------------------------------------------------------------------------------------------------------------------------------------------------------------------------------------------------------------------------------------------------------------------------------------------------------------------------------------------------------------------------------------------------------------------------------------------------------------------------------------------------------------------------------------------------------------------------------------------------------------------------------------------------------------------------------------------------------------------------------------------------------------------------------------------------------------------------------------------------------------------------------------------------------------------------------------------------------------------------------------------------------------------------------------------------------------------------------------------------------------------------------------------------------------------------------------------------------------------------------------------------------------------------------------------------------------------------------------------------------------------------------------------------------------------------------------------------------------------------------------------------------------------------------------------------------------------------------------------------------------------------------------------------------------------------------------------------------------------------------------------------------------------------------------------------------------------------------------------------------------------------------------------------------------------------------------------------------------------------------------------------------------------------------------------------------------------------------------------------------------------------------------------------------------------------------------------------------------------------------------------------------------------------------------------------------------------------------------------------------------------------------------------------------------------------------------------------------------------------------------------------------------------------------------------------------------------------------------------------------------------------------------------------------------------------------------------------------------------------------------------------------------------------------------------------------------------------------------------------------------------------------------------------------------------------------------------------------------------------------------------------------------------------------------------------------------------------------------------------------------------------------------------------------------------------------------------------------------------------------------------------------------------------------------------------------------------------------------------------------------------------------------------------------------------------------------------------------------------------------------------------------------------------------------------------------------------------------------------------------------------------------------------------------------------------------------------------------------------------------------------------------------------------------------------------------------------------------------------------------------------------------------------------------------------------------------------------------------------------------------------------------------------------------------------------------------------------------------------------------------------------------------------------------------------------------------------------------------------------------------------------------------------------------------------------------------------------------------------------------------------------------------------------------------------------------------------------------------------------------------------------------------------------------------------------------------------------------------------------------------------------------------------------------------------------------------------------------------------------------------------------------------------------------------------------------------------------------------------------------------------------------------------------------------------------------------------------------------------------------------------------------------------------------------------------------------------------------------------------------------------------------------------------------------------------------------------------------------------------------------------------------------------------------------------------------------------------------------------------------------------------------------------------------------------------------------------------------------------------------------------------------------------------------------------------------------------------------------------------------------------------------------------------------------------------------------------------------------------------------------------------------------------------------------------------------------------------------------------------------------------------------------------------------------------------------------------------------------------------------------------------------------------------------------------------------------------------------------------------------------------------------------------------------------------------------------------------------------------------------------------------------------------------------------------------------------------------------------------------------------------------------------------------------------------------------------------------------------------------------------------------------------------------------------------------------------------------------------------------------------------------------------------------------------------------------------------------------------------------------------------------------------------------------------------------------------------------------------------------------------------------------------------------------------------------------------------------------------------------------------------------------------------------------------------------------------------------------------------------------------------------------------------------------------------------------------------------------------------------------------------------------------------------------------------------------------------------------------------------------------------------------------------------------------------------------------------------------------------------------------------------------------------------------------------------------------------------------------------------------------------------------------------------|------|------|------|------|------|------|------|--|
| conservation | ●●●●●●●●●●●●●●●●●●●●●●●●●●●●●●●●●●●●●●●●●●●●●●●●●●●●●●●●●●●●●●●●●●●●●●●●●●●●●●●●●●●●●●●●●●●●●●●●●●●●●●●●●●●●●●●●●●●●●●●●●●●●●●●●●●●●●●●●●●●●●●●●●●●●●●●●●●●●●●●●●●●●●●●●●●●●●●●●●●●●●●●●●●●●●●●●●●●●●●●●●●●●●●●●●●●●●●●●●●●●●●●●●●●●●●●●●●●●●●●●●●●●●●●●●●●●●●●●●●●●●●●●●●●●●●●●●●●●●●●●●●●●●●●●●●●●●●●●●●●●●●●●●●●●●●●●●●●●●●●●●●●●●●●●●●●●●●●●●●●●●●●●●●●●●●●●●●●●●●●●●●●●●●●●●●●●●●●●●●●●●●●●●●●●●●●●●●●●●●●●●●●●●●●●●●●●●●●●●●●●●●●●●●●●●●●●●●●●●●●●●●●●●●●●●●●●●●●●●●●●●●●●●●●●●●●●●●●●●●●●●●●●●●●●●●●●●●●●●●●●●●●●●●●●●●●●●●●●●●●●●●●●●●●●●●●●●●●●●●●●●●●●●●●●●●●●●●●●●●●●●●●●●●●●●●●●●●●●●●●●●●●●●●●●●●●●●●●●●●●●●●●●●●●●●●●●●●●●●●●●●●●●●●●●●●●●●●●●●●●●●●●●●●●●●●●●●●●●●●●●●●●●●●●●●●●●●●●●●●●●●●●●●●●●●●●●●●●●●●●●●●●●●●●●●●●●●●●●●●●●●●●●●●●●●●●●●●●●●●●●●●●●●●●●●●●●●●●●●●●●●●●●●●●●●●●●●●●●●●●●●●●●●●●●●●●●●●●●●●●●●●●●●●●●●●●●●●●●●●●●●●●●●●●●●●●●●●●●●●●●●●●●●●●●●●●●●●●●●●●●●●●●●●●●●●●●●●●●●●●●●●●●●●●●●●●●●●●●●●●●●●●●●●●●●●●●●●●●●●●●●●●●●●●●●●●●●●●●●●●●●●●●●●●●●●●●●●●●●●●●●●●●●●●●●●●●●●●●●●●●●●●●●●●●●●●●●●●●●●●●●●●●●●●●●●●●●●●●●●●●●●●●●●●●●●●●●●●●●●●●●●●●●●●●●●●●●●●●●●●●●●●●●●●●●●●●●●●●●●●●●●●●●●●●●●●●●●●●●●●●●●●●●●●●●●●●●●●●●●●●●●●●●●●●●●●●●●●●●●●●●●●●●●●●●●●●●●●●●●●●●●●●●●●●●●●●●●●●●●●●●●●●●●●●●●●●●●●●●●●●●●●●●●●●●●●●●●●●●●●●●●●●●●●●●●●●●●●●●●●●●●●●●●●●●●●●●●●●●●●●●●●●●●●●●●●●●●●●●●●●●●●●●●●●●●●●●●●●●●●●●●●●●●●●●●●●●●●●●●●●●●●●●●●●●●●●●●●●●●●●●●●●●●●●●●●●●●●●●●●●●●●●●●●●●●●●●●●●●●●●●●●●●●●●●●●●●●●●●●●●●●●●●●●●●●●●●●●●●●●●●●●●●●●●●●●●●●●●●●●●●●●●●●●●●●●●●●●●●●●●●●●●●●●●●●●●●●●●●●●●●●●●●●●●●●●●●●●●●●●●●●●●●●●●●●●●●●●●●●●●●●●●●●●●●●●●●●●●●●●●●●●●●●●●●●●●●●●●●●●●●●●●●●●●●●●●●●●●●●●●●●●●●●●●●●●●●●●●●●●●●●●●●●●●●●●●●●●●●●●●●●●●●●●●●●●●●●●●●●●●●●●●●●●●●●●●●●●●●●●●●●●●●●●●●●●●●●●●●●●●●●●●●●●●●●●●●●●●●●●●●●●●●●●●●●●●●●●●●●●●●●●●●●●●●●●●●●●●●●●●●●●●●●●●●●●●●●●●●●●●●●●●●●●●●●●●●●●●●●●●●●●●●●●●●●●●●●●●●●●●●●●●●●●●●●●●●●●●●●●●●●●●●●●●●●●●●●●●●●●●●●●●●●●●●●●●●●●●●●●●●●●●●●●●●●●●●●●●●●●●●●●●●●●●●●●●●●●●●●●●●●●●●●●●●●●●●●●●●●●●●●●●●●●●●●●●●●●●●●●●●●●●●●●●●●●●●●●●●●●●●●●●●●●●●●●●●●●●●●●●●●●●●●●●●●●●●●●●●●●●●●●●●●●●●●●●●●●●●●●●●●●●●●●●●●●●●●●●●●●●●●●●●●●●●●●●●●●●●●●●●●●●●●●●●●●●●●●●●●●●●●●●●●●●●●●●●●●●●●●●●●●●●●●●●●●●●●●●●●●●●●●●●●●●●●●●●●●●●●●●●●●●●●●●●●●●●●●●●●●●●●●●●●●●●●●●●●●●●●●●●●●●●●●●●●●●●●●●●●●●●●●●●●●●●●●●●●●●●●●●●●●●●●●●●●●●●●●●●●●●●●●●●●●●●●●●●●●●●●●●●●●●●●●●●●●●●●●●●●●●●●●●●●●●●●●●●●●●●●●●●●●●●●●●●●●●●●●●●●●●●●●●●●●●●●●●●●●●●●●●●●●●●●●●●●●●●●●●●●●●●●●●●●●●●●●●●●●●●●●●●●●●●●●●●●●●●●●●●●●●●●●●●●●●●●●●●●●●●●●●●●●●●●●●●●●●●●●●●●●●●●●●●●●●●●●●●●●●●●●●●●●●●●●●●●●●●●●●●●●●●●●●●●●●●●●●●●●●●●●●●●●●●●●●●●●●●●●●●●●●●●●●●●●●●●●●●●●●●●●●●●●●●●●●●●●●●●●●●●●●●●●●●●●●●●●●●●●●●●●●●●●●●●●●●●●●●●●●●●●●●●●●●●●●●●●●●●●●●●●●●●●●●●●●●●●●●●●●●●●●●●●●●●●●●●●●●●●●●●●●●●●●●●●●●●●●●●●●●●●●●●●●●●●●●●●●●●●●●●●●●●●●●●●●●●●●●●●●●●●●●●●●●●●●●●●●●●●●●●●●●●●●●●●●●●●●●●●●●●●●●●●●●●●●●●●●●●●●●●●●●●●●●●●●●●●●●●●●●●●●●●●●●●●●●●●●●●●●●●●●●●●●●●●●●●●●●●●●●●●●●●●●●●●●●●●●●●●●●●●●●●●●●●●●●●●●●●●●●●●●●●●●●●●●●●●●●●●●●●●●●●●●●●●●●●●●●●●●●●●●●●●●●●●●●●●●●●●●●●●●●●●●●●●●●●●●●●●●●●●●●●●●●●●●●●●●●●●●●●●●●●●●●●●●●●●●●●●●●●●●●●●●●●●●●●●●●●●●●●●●●●●●●●●●●●●●●●●●●●●●●●●●●●●●●●●●●●●●●●●●●●●●●●●●●●●●●●●●●●●●●●●●●●●●●●●●●●●●●●●●●●●●●●●●●●●●●●●●●●●●●●●●●●●●●●●●●●●●●●●●●●●●●●●●●●●●●●●●●●●●●●●●●●●●●●●●●●●●●●●●●●●●●●●●●●●●●●●●●●●●●●●●●●●●●●●●●●●●●●●●●●●●●●●●●●●●●●●●●●●●●●●●●●●●●●●●●●●●●●●●●●●●●●●●●●●●●●●●●●●●●●●●●●●●●●●●●●●●●●●●●●●●●●●●●●●●●●●●●●●●●●●●●●●●●●●●●●●●●●●●●●●●●●●●●●●●●●●●●●●●●●●●●●●●●●●●●●●●●●●●●●●●●●●●●●●●●●●●●●●●●●●●●●●●●●●●●●●●●●●●●●●●●●●●●●●●●●●●●●●●●●●●●●●●●●●●●●●●●●●●●●●●●●●●●●●●●●●●●●●●●●●●●●●●●●●●●●●●●●●●●●●●●●●●●●●●●●●●●●●●●●●●●●●●●●●●●●●●●●●●●●●●●●●●●●●●●●●●●●●●●●●●●●●●●●●●●●●●●●●●●●●●●●●●●●●●●●●●●●●●●●●●●●●●●●●●●●●●●●●●●●●●●●●●●●●●●●●●●●●●●●●●●●●●●●●●●●●●●●●●●●●●●●●●●●●●●●●●●●●●●●●●●●●●●●●●●●●●●●●●●●●●●●●●●●●●●●●●●●●●●●●●●●●●●●●●●●●●●●●●●●●●●●●●●●●●●●●●●●●●●●●●●●●●●●●●●●●●●●●●●●●●●●●●●●●●●●●●●●●●●●●●●●●●●●●●●●●●●●●●●●●●●●●●●●●●●●●●●●●●●●●●●●●●●●●●●●●●●●●●●●●●●●●●●●●●●●●●●●●●●●●●●●●●●●●●●●●●●●●●●●●●●●●●●●●●●●●●●●●●●●●●●●●●●●●●●●●●●●●●●●●●●●●●●●●●●●●●●●●●●●●●●●●●●●●●●●●●●●●●●●●●●●●●●●●●●●●●●●●●●●●●●●●●●●●●●●●●●●●●●●●●●●●●●●●●●●●●●●●●●●●●●●●●●●●●●●●●●●●●●●●●●●●●●●●●●●●●●●●●●●●●●●●●●●●●●●●●●●●●●●●●●●●●●●●●●●●●●●●●●●●●●●●●●●●●●●●●●●●●●●●●●●●●●●●●●●●●●●●●●●●●●●●●●●●●●●●●●●●●●●●●●●●●●●●●●●●●●●●●●●●●●●●●●●●●●●●●●●●●●●●●●●●●●●●●●●●●●●●●●●●●●●●●●●●●●●●●●●●●●●●●●●●●●●●●●●●●●●●●●●●●●●●●●●●●●●●●●●●●●●●●●●●●●●●●●●●●●●●●●●●●●●●●●●●●●●●●●●●●●●●●●●●●●●●●●●●●●●●●●●●●●●●●●●●●●●●●●●●●●●●●●●●●●●●●●●●●●●●●●●●●●●●●●●●●●●●●●●●●●●●●●●●●●●●●●●●●●●●●●●●●●●●●●●●●●●●●●●●●●●●●●●●●●●●●●●●●●●●●●●●●●●●●●●●●●●●●●●●●●●●●●●●●●●●●●●●●●●●●●●●●●●●●●●●●●●●●●●●●●●●●●●●●●●●●●●●●●●●●●●●●●●●●●●●●●●●●●●●●●●●●●●●●●●●●●●●●●●●●●●●●●●●●●●●●●●●●●●●●●●●●●●●●●●●●●●●●●●●●●●●●●●●●●●●●●●●●●●●●●●●●●●●●●●●●●●●●●●●●●●●●●●●●●●●●●●●●●●●●●●●●●●●●●●●●●●●●●●●●●●●●●●●●●●●●●●●●●●●●●●●●●●●●●●●●●●●●●●●●●●●●●●●●●●●●●●●●●●●●●●●●●●●●●●●●●●●●●●●●●●●●●●●●●●●●●●●●●●●●●●●●●●●●●●●●●●●●●●●●●●●●●●●●●●●●●●●●●●●●●●●●●●●●●●●●●●●●●●●●●●●●●●●●●●●●●●●●●●●●●●●●●●●●●●●●●●●●●●●●●●●●●●●●●●●●●●●●●●●●●●●●●●●●●●●●●●●●●●●●●●●●●●●●●●●●●●●●●●●●●●●●●●●●●●●●●●●●●●●●●●●●●●●●●●●●●●●●●●●●●●●●●●●●●●●●●●●●●●●●●●●●●●●●●●●●●●●●●●●●●●●●●●●●●●●●●●●●●●●●●●●●●●●●●●●●●●●●●●●●●●●●●●●●●●●●●●●●●●●●●●●●●●●●●●●●●●●●●●●●●●●●●●●●●●●●●●●●●●●●●●●●●●●●●●●●●●●●●●●●●●●●●●●●●●●●●●●●●●●●●●●●●●●●●●●●●●●●●●●●●●●●●●●●●●●●●●●●●●●●●●●●●●●●●●●●●●●●●●●●●●●●●●●●●●●●●●●●●●●●●●●●●●●●●●●●●●●●●●●●●●●●●●●●●●●●●●●●●●●●●●●●●●●●●●●●●●●●●●●●●●●●●●●●●●●●●●●●●●●●●●●●●●●●●●●●●●●●●●●●●●●●●●●●●●●●●●●●●●●●●●●●●●●●●●●●●●●●●●●●●●●●●●●●●●●●●●●●●●●●●●●●●●●●●●●●●●●●●●●●●●●●●●●●●●●●●●●●●●●●●●●●●●●●●●●●●●●●●●●●●●●●●●●●●●●●●●●●●●●●●●●●●●●●●●●●●●●●●●●●●●●●●●●●●●●●●●●●●●●●●●●●●●●●●●●●●●●●●●●●●●●●●●●●●●●●●●●●●●●●●●●●●●●●●●●●●●●●●●●●●●●●●●●●●●●●●●●●●●●●●●●●●●●●●●●●●●●●●●●●●●●●●●●●●●●●●●●●●●●●●●●●●●●●●●●●●●●●●●●●●●●●●●●●●●●●●●●●●●●●●●●●●●●●●●●●●●●●●●●●●●●●●●●●●●●●●●●●●●●●●●●●●●●●●●●●●●●●●●●●●●●●●●●●●●●●●●●●●●●●●●●●●●●●●●●●●●●●●●●●●●●●●●●●●●●●●●●●●●●●●●●●●●●●●●●●●●●●●●●●●●●●●●●●●●●●●●●●●●●●●●●●●●●●●●●●●●●●●●●●●●●●●●●●●●●●●●●●●●●●●●●●●●●●●●●●●●●●●●●●●●●●●●●●●●●●●●●●●●●●●●●●●●●●●●●●●●●●●●●●●●●●●●●●●●●●●●●●●●●●●●●●●●●●●●●●●●●●●●●●●●●●●●●●●●●●●●●●●●●●●●●●●●●●●●●●●●●●●●●●●●●●●●●●●●●●●●●●●●●●●●●●●●●●●●●●●●●●●●●●●●●●●●●●●●●●●●●●●●●●●●●●●●●●●●●●●●●●●●●●●●●●●●●●●●●●●●●●●●●●●●●●●●●●●●●●●●●●●●●●●●●●●●●●●●●●●●●●●●●●●●●●●●●●●●●●●●●●●●●●●●●●●●●●●●●●●●●●●●●●●●●●●●●●●●●●●●●●●●●●●●●●●●●●●●●●●●●●●●●●●●●●●●●●●●●●●●●●●●●●●●●●●●●●●●●●●●●●●●●●●●●●●●●●●●●●●●●●●●●●●●●●●●●●●●●●●●●●●●●●●●●●●●●●●●●●●●●●●●●●●●●●●●●●●●●●●●●●●●●●●●●●●●●●●●●●●●●●●●●●●●●●●●●●●●●●●●●●●●●●●●●●●●●●●●●●●●●●●●●●●●●●●●●●●●●●●●●●●●●●●●●●●●●●●●●●●●●●●●●●●●●●●●●●●●●●●●●●●●●●●●●●●●●●●●●●●●●●●●●●●●●●●●●●●●●●●●●●●●●●●●●●●●●●●●●●●●●●●●●●●●●●●●●●●●●●●●●●●●●●●●●●●●●●●●●●●●●●●●●●●●●●●●●●●●●●●●●●●●●●●●●●●●●●●●●●●●●●●●●●●●●●●●●●●●●●●●●●●●●●●●●●●●●●●●●●●●●●●●●●●●●●●●●●●●●●●●●●●●●●●●●●●●●●●●●●●●●●●●●●●●●●●●●●●●●●●●●●●●●●●●●●●●●●●●●●●●●●●●●●●●●●●●●●●●●●●●●●●●●●●●●●●●●●●●●●●●●●●●●●●●●●●●●●●●●●●●●●●●●●●●●●●●●●●●●●●●●●●●●●●●●●●●●●●●●●●●●●●●●●●●●●●●●●●●●●●●●●●●●●●●●●●●●●●●●●●●●●●●●●●●●●●●●●●●●●●●●●●●●●●●●●●●●●●●●●●●●●●●●●●●●●●●●●●●●●●●●●●●●●●●●●●●●●●●●●●●●●●●●●●●●●●●●●●●●●●●●●●●●●●●●●●●●●●●●●●●●●●●●●●●●●●●●●●●●●●●●●●●●●●●●●●●●●●●●●●●●●●●●●●●●●●●●●●●●●●●●●●●●●●●●●●●●●●●●●●●●●●●●●●●●●●●●●●●●●●●●●●●●●●●●●●●●●●●●●●●●●●●●●●●●●●●●●●●●●●●●●●●●●●●●●●●●●●●●●●●●●●●●●●●●●●●●●●●●●●●●●●●●●●●●●●●●●●●●●●●●●●●●●●●●●●●●●●●●●●●●●●●●●●●●●●●●●●●●●●●●●●●●●●●●●●●●●●●●●●●●●●●●●●●●●●●●●●●●●●●●●●●●●●●●●●●●●●●●●●●●●●●●●●●●●●●●●●●●●●●●●●●●●●●●●●●●●●●●●●●●●●●●●●●●●●●●●●●●●●●●●●●●●●●●●●●●●●●●●●●●●●●●●●●●●●●●●●●●●●●●●●●●●●●●●●●●●●●●●●●●●●●●●●●●●●●●●●●●●●●●●●●●●●●●●●●●●●●●●●●●●●●●●●●●●●●●●●●●●●●●●●●●●●●●●●●●●●●●●●●●●●●●●●●●●●●●●●●●●●●●●●●●●●●●●●●●●●●●●●●●●●●●●●●●●●●●●●●●●●●●●●●●●●●●●●●●●●●●●●●●●●●●●●●●●●●●●●●●●●●●●●●●●●●●●●●●●●●●●●●●●●●●●●●●●●●●●●●●●●●●●●●●●●●●●●●●●●●●●●●●●●●●●●●●●●●●●●●●●●●●●●●●●●●●●●●●●●●●●●●●●●●●●●●●●●●●●●●●●●●●●●●●●●●●●●●●●●●●●●●●●●●●●●●●●●●●●●●●●●●●●●●●●●●●●●●●●●●●●●●●●●●●●●●●●●●●●●●●●●●●●●●●●●●●●●●●●●●●●●●●●●●●●●●●●●●●●●●●●●●●●●●●●●●●●●●●●●●●●●●●●●●●●●●●●●●●●●●●●●●●●●●●●●●●●●●●●●●●●●●●●●●●●●●●●●●●●●●●●●●●●●●●●●●●●●●●●●●●●●●●●●●●●●●●●●●●●●●●●●●●●●●●●●●●●●●●●●●●●●●●●●●●●●●●●●●●●●●●●●●●●●●●●●●●●●●●●●●●●●●●●●●●●●●●●●●●●●●●●●●●●●●●●●●●●●●●●●●●●●●●●●●●●●●●●●●●●●●●●●●●●●●●●●●●●●●●●●●●●●●●●●●●●●●●●●●●●●●●●●●●●●●●●●●●●●●●●●●●●●●●●●●●●●●●●●●●●●●●●●●●●●●●●●●●●●●●●●●●●●●●●●●●●●●●●●●●●●●●●●●●●●●●●●●●●●●●●●●●●●●●●●●●●●●●●●●●●●●●●●●●●●●●●●●●●●●●●●●●●●●●●●●●●●●●●●●●●●●●●●●●●●●●●●●●●●●●●●●●●●●●●●●●●●●●●●●●●●●●●●●●●●●●●●●●●●●●●●●●●●●●●●●●●●●●●●●●●●●●●●●●●●●●●●●●●●●●●●●●●●●●●●●●●●●●●●●●●●●●●●●●●●●●●●●●●●●●●●●●●●●●●●●●●●●●●●●●●●●●●●●●●●●●●●●●●●●●●●●●●●●●●●●●●●●●●●●●●●●●●●●●●●●●●●●●●●●●●●●●●●●●●●●●●●●●●●●●●●●●●●●●●●●●●●●●●●●●●●●●●●●●●●●●●●●●●●●●●●●●●●●●●●●●●●●●●●●●●●●●●●●●●●●●●●●●●●●●●●●●●●●●●●●●●●●●●●●●●●●●●●●●●●●●●●●●●●●●●●●●●●●●●●●●●●●●●●●●●●●●●●●●●●●●●●●●●●●●●●●●●●●●●●●●●●●●●●●●●●●●●●●●●●●●●●●●●●●●●●●●●●●●●●●●●●●●●●●●●●●●●●●●●●●●●●●●●●●●●●●●●●●●●●●●●●●●●●●●●●●●●●●●●●●●●●●●●●●●●●●●●●●●●●●●●●●●●●●●●●●●●●●●●●●●●●●●●●●●●●●●●●●●●●●●●●●●●●●●●●●●●●●●●●●●●●●●●●●●●●●●●●●●●●●●●●●●●●●●●●●●●●●●●●●●●●●●●●●●●●●●●●●●●●●●●●●●●●●●●●●●●●●●●●●●●●●●●●●●●●●●●●●●●●●●●●●●●●●●●●●●●●●●●●●●●●●●●●●●●●●●●●●●●●●●●●●●●●●●●●●●●●●●●●●●●●●●●●●●●●●●●●●●●●●●●●●●●●●●●●●●●●●●●●●●●●●●●●●●●●●●●●●●●●●●●●●●●●●●●●●●●●●●●●●●●●●●●●●●●●●●●●●●●●●●●●●●●●●●●●●●●●●●●●●●●●●●●●●●●●●●●●●●●●●●●●●●●●●●●●●●●●●●●●●●●●●●●●●●●●●●●●●●●●●●●●●●●●●●●●●●●●●●●●●●●●●●●●●●●●●●●●●●●●●●●●●●●●●●●●●●●●●●●●●●●●●●●●●●●●●●●●●●●●●●●●●●●●●●●●●●●●●●●●●●●●●●●●●●●●●●●●●●●●●●●●●●●●●●●●●●●●●●●●●●●●●●●●●●●●●●●●●●●●●●●●●●●●●●●●●●●●●●●●●●●●●●●●●●●●●●●●●●●●●●●●●●●●●●●●●●●●●●●●●●●●●●●●●●●●●●●●●●●●●●●●●●●●●●●●●●●●●●●●●●●●●●●●●●●●●●●●●●●●●●●●●●●●●●●●●●●●●●●●●●●●●●●●●●●●●●●●●●●●●●●●●●●●●●●●●●●●●●●●●●●●●●●●●●●●●●●●●●●●●●●●●●●●●●●●●●●●●●●●●●●●●●●●●●●●●●●●●●●●●●●●●●●●●●●●●●●●●●●●●●●●●●●●●●●●●●●●●●●●●●●●●●●●●●●●●●●●●●●●●●●●●●●●●●●●●●●●●●●●●●●●●●●●●●●●●●●●●●●●●●●●●●●●●●●●●●●●●●●●●●●●●●●●●●●●●●●●●●●●●●●●●●●●●●●●●●●●●●●●●●●●●●●●●●●●●●●●●●●●●●●●●●●●●●●●●●●●●●●●●●●●●●●●●●●●●●●●●●●●●●●●●●●●●●●●●●●●●●●●●●●●●●●●●●●●●●●●●●●●●●●●●●●●●●●●●●●●●●●●●●●●●●●●●●●●●●●●●●●●●●●●●●●●●●●●●●●●●●●●●●●●●●●●●●●●●●●●●●●●●●●●●●●●●●●●●●●●●●●●●●●●●●●●●●●●●●●●●●●●●●●●●●●●●●●●●●●●●●●●●●●●●●●●●●●●●●●●●●●●●●●●●●●●●●●●●●●●●●●●●●●●●●●●●●●●●●●●●●●●●●●●●●●●●●●●●●●●●●●●●●●●●●●●●●●●●●●●●●●●●●●●●●●●●●●●●●●●●●●●●●●●●●●●●●●●●●●●●●●●●●●●●●●●●●●●●●●●●●●●●●●●●●●●●●●●●●●●●●●●●●●●●●●●●●●●●●●●●●●●●●●●●●●●●●●●●●●●●●●●●●●●●●●●●●●●●●●●●●●●●●●●●●●●●●●●●●●●●●●●●●●●●●●●●●●●●●●●●●●●●●●●●●●●●●●●●●●●●●●●●●●●●●●●●●●●●●●●●●●●●●●●●●●●●●●●●●●●●●●●●●●●●●●●●●●●●●●●●●●●●●●●●●●●●●●●●●●●●●●●●●●●●●●●●●●●●●●●●●●●●●●●●●●●●●●●●●●●●●●●●●●●●●●●●●●●●●●●●●●●●●●●●●●●●●●●●●●●●●●●●●●●●●●●●●●●●●●●●●●●●●●●●●●●●●●●●●●●●●●●●●●●●●●●●●●●●●●●●●●●●●●●●●●●●●●●●●●●●●●●●●●●●●●●●●●●●●●●●●●●●●●●●●●●●●●●●●●●●●●●●●●●●●●●●●●●●●●●●●●●●●●●●●●●●●●●●●●●●●●●●●●●●●●●●●●●●●●●●●●●●●●●●●●●●●●●●●●●●●●●●●●●●●●●●●●●●●●●●●●●●●●●●●●●●●●●●●●●●●●●●●●●●●●●●●●●●●●●●●●●●●●●●●●●●●●●●●●●●●●●●●●●●●●●●●●●●●●●●●●●●●●●●●●●●●●●●●●●●●●●●●●●●●●●●●●●●●●●●●●●●●●●●●●●●●●●●●●●●●●●●●●●●●●●●●●●●●●●●●●●●●●●●●●●●●●●●●●●●●●●●●●●●●●●●●●●●●●●●●●●●●●●●●●●●●●●●●●●●●●●●●●●●●●●●●●●●●●●●●●●●●●●●●●●●●●●●●●●●●●●●●●●●●●●●●●●●●●●●●●●●●●●●●●●●●●●●●●●●●●●●●●●●●●●●●●●●●●●●●●●●●●●●●●●●●●●●●●●●●●●●●●●●●●●●●●●●●●●●●●●●●●●●●●●●●●●●●●●●●●●●●●●●●●●●●●●●●●●●●●●●●●●●●●●●●●●●●●●●●●●●●●●●●●●●●●●●●●●●●●●●●●●●●●●●●●●●●●●●●●●●●●●●●●●●●●●●●●●●●●●●●●●●●●●●●●●●●●●●●●●●●●●●●●●●●●●●●●●●●●●●●●●●●●●●●●●●●●●●●●●●●●●●●●●●●●●●●●●●●●●●●●●●●●●●●●●●●●●●●●●●●●●●●●●●●●●●●●●●●●●●●●●●●●●●●●●●●●●●●●●●●●●●●●●●●●●●●●●●●●●●●●●●●●●●●●●●●●●●●●●●●●●●●●●●●●●●●●●●●●●●●●●●●●●●●●●●●●●●●●●●●●●●●●●●●●●●●●●●●●●●●●●●●●●●●●●●●●●●●●●●●●●●●●●●●●●●●●●●●●●●●●●●●●●●●●●●●●●●●●●●●●●●●●●●●●●●●●●●●●●●●●●●●●●●●●●●●●●●●●●●●●●●●●●●●●●●●●●●●●●●●●●●●●●●●●●●●●●●●●●●●●●●●●●●●●●●●●●●●●●●●●●●●●●●●●●●●●●●●●●●●●●●●●●●●●●●●●●●●●●●●●●●●●●●●●●●●●●●●●●●●●●●●●●●●●●●●●●●●●●●●●●●●●●●●●●●●●●●●●●●●●●●●●●●●●●●●●●●●●●●●●●●●●●●●●●●●●●●●●●●●●●●●●●●●●●●●●●●●●●●●●●●●●●●●●●●●●●●●●●●●●●●●●●●●●●●●●●●●●●●●●●●●●●●●●●●●●●●●●●●●●●●●●●●●●●●●●●●●●●●●●●●●●●●●●●●●●●●●●●●●●●●●●●●●●●●●●●●●●●●●●●●●●●●●●●●●●●●●●●●●●●●●●●●●●●●●●●●●●●●●●●●●●●●●●●●●●●●●●●●●●●●●●●●●●●●●●●●●●●●●●●●●●●●●●●●●●●●●●●●●●●●●●●●●●●●●●●●●●●●●●●●●●●●●●●●●●●●●●●●●●●●●●●●●●●●●●●●●●●●●●●●●●●●●●●●●●●●●●●●●●●●●●●●●●●●●●●●●●●●●●●●●●●●●●●●●●●●●●●●●●●●●●●●●●●●●●●●●●●●●●●●●●●●●●●●●●●●●●●●●●●●●●●●●●●●●●●●●●●●●●●●●●●●●●●●●●●●●●●●●●●●●●●●●●●●●●●●●●●●●●●●●●●●●●●●●●●●●●●●●●●●●●●●●●●●●●●●●●●●●●●●●●●●●●●●●●●●●●●●●●●●●●●●●●●●●●●●●●●●●●●●●●●●● |      |      |      |      |      |      |      |  |



|              | 1780                                                                                                                                                                                                                                                                                                                                                                                                                                                                                                                                                                                                                                                                                                                                                                                                                                                                                                                                                                                                                                                                                                                                                                                                                                                                                                                                                                                                                                                                                                                                                                                                                                                                                                                                                                                                                                                                                                                                                                                                                                                                                                                                                                                                                                                                                                                                                                                                                                                                                                                                                                                                                                                                                                                                                                                                                                                                                                                                                                                                                                                                                                                                                                                                                                                                                                                                                                                                                                                                                                                                                                                                                                                                                                                                                                                                                                                                                                                                                                                                                                                                                                                                                                                                                                                                                                                                                                                                                                                                                                                                                                                                                                                                                                                                                                                                                                                                                                                                                                                                                                                                                                                                                                                                                                                                                                                                                                                                                                                                                                                                                                                                                                                                                                                                                                                                                                                                                                                                                                                                                                                                                                                                                                                                                                                                                                                                                                                                                                                                                                                                                                                                                                                                                                                                                                                                                                                                                                                                                                                                                                                                                                                                                                                                                                                                                                                                                                                                                                                                                                                                                                                                                                                                                                                                                                                                                                                                                                                                                                                                                                                                                                                                                                                                                                                                                                                                                                                                                                                                                                                                                                                                                                                                                                                                                                                                                                                                                                                                                                                                                                                                                                                                                                                                                                                                                                                                                                                                                                                                                                                                                                                                                                                                                                                                                                                                                                                                                                                                                                                                                                                                                                                                                                                                                                                                                                                                                                                                                                                                                                                                                                                                                                                                                                                                                                                                                                                                                                                                                                                                                                                                                                                                                                                                                                                                                                                                                                                                                                                                                                                                                                                                                                                                                                                                                                                                                                                                                                                                                                                                                                                                                                                                                                                                                                                                                                                                                                                                                                                                                                                                                                                                                                                                                                                                                                                            | 1790 | 1800 | 1810 | 1820 | 1830 | 1840 | 1850 |  |
|--------------|-------------------------------------------------------------------------------------------------------------------------------------------------------------------------------------------------------------------------------------------------------------------------------------------------------------------------------------------------------------------------------------------------------------------------------------------------------------------------------------------------------------------------------------------------------------------------------------------------------------------------------------------------------------------------------------------------------------------------------------------------------------------------------------------------------------------------------------------------------------------------------------------------------------------------------------------------------------------------------------------------------------------------------------------------------------------------------------------------------------------------------------------------------------------------------------------------------------------------------------------------------------------------------------------------------------------------------------------------------------------------------------------------------------------------------------------------------------------------------------------------------------------------------------------------------------------------------------------------------------------------------------------------------------------------------------------------------------------------------------------------------------------------------------------------------------------------------------------------------------------------------------------------------------------------------------------------------------------------------------------------------------------------------------------------------------------------------------------------------------------------------------------------------------------------------------------------------------------------------------------------------------------------------------------------------------------------------------------------------------------------------------------------------------------------------------------------------------------------------------------------------------------------------------------------------------------------------------------------------------------------------------------------------------------------------------------------------------------------------------------------------------------------------------------------------------------------------------------------------------------------------------------------------------------------------------------------------------------------------------------------------------------------------------------------------------------------------------------------------------------------------------------------------------------------------------------------------------------------------------------------------------------------------------------------------------------------------------------------------------------------------------------------------------------------------------------------------------------------------------------------------------------------------------------------------------------------------------------------------------------------------------------------------------------------------------------------------------------------------------------------------------------------------------------------------------------------------------------------------------------------------------------------------------------------------------------------------------------------------------------------------------------------------------------------------------------------------------------------------------------------------------------------------------------------------------------------------------------------------------------------------------------------------------------------------------------------------------------------------------------------------------------------------------------------------------------------------------------------------------------------------------------------------------------------------------------------------------------------------------------------------------------------------------------------------------------------------------------------------------------------------------------------------------------------------------------------------------------------------------------------------------------------------------------------------------------------------------------------------------------------------------------------------------------------------------------------------------------------------------------------------------------------------------------------------------------------------------------------------------------------------------------------------------------------------------------------------------------------------------------------------------------------------------------------------------------------------------------------------------------------------------------------------------------------------------------------------------------------------------------------------------------------------------------------------------------------------------------------------------------------------------------------------------------------------------------------------------------------------------------------------------------------------------------------------------------------------------------------------------------------------------------------------------------------------------------------------------------------------------------------------------------------------------------------------------------------------------------------------------------------------------------------------------------------------------------------------------------------------------------------------------------------------------------------------------------------------------------------------------------------------------------------------------------------------------------------------------------------------------------------------------------------------------------------------------------------------------------------------------------------------------------------------------------------------------------------------------------------------------------------------------------------------------------------------------------------------------------------------------------------------------------------------------------------------------------------------------------------------------------------------------------------------------------------------------------------------------------------------------------------------------------------------------------------------------------------------------------------------------------------------------------------------------------------------------------------------------------------------------------------------------------------------------------------------------------------------------------------------------------------------------------------------------------------------------------------------------------------------------------------------------------------------------------------------------------------------------------------------------------------------------------------------------------------------------------------------------------------------------------------------------------------------------------------------------------------------------------------------------------------------------------------------------------------------------------------------------------------------------------------------------------------------------------------------------------------------------------------------------------------------------------------------------------------------------------------------------------------------------------------------------------------------------------------------------------------------------------------------------------------------------------------------------------------------------------------------------------------------------------------------------------------------------------------------------------------------------------------------------------------------------------------------------------------------------------------------------------------------------------------------------------------------------------------------------------------------------------------------------------------------------------------------------------------------------------------------------------------------------------------------------------------------------------------------------------------------------------------------------------------------------------------------------------------------------------------------------------------------------------------------------------------------------------------------------------------------------------------------------------------------------------------------------------------------------------------------------------------------------------------------------------------------------------------------------------------------------------------------------------------------------------------------------------------------------------------------------------------------------------------------------------------------------------------------------------------------------------------------------------------------------------------------------------------------------------------------------------------------------------------------------------------------------------------------------------------------------------------------------------------------------------------------------------------------------------------------------------------------------------------------------------------------------------------------------------------------------------------------------------------------------------------------------------------------------------------------------------------------------------------------------------------------------------------------------------------------------------------------------------------------------------------------------------------------------------------------------------------------------------------------------------------------------------------------------------------------------------------------------------------------------------------------------------------------------------------------------------------------------------------------------------------------------------------------------------------------------------------------------------------------------------------------------------------------------------------------------------------------------------------------------------------------------------------------------------------------------------------------------------------------------------------------------------------------------------------------------------------------------------------------------------------------------------------------------------------------------------------------------------------------------------------------------------------------------------------------------------------------------------------------------------------------------------------------------------------------------------------------------------------------------------------------------------------------------------------------------------------------------------------------------------------------------------------------------------------------------------------------------------------------------------------------------------------------------------------------------------------------------------------------------------------------------------------------------------------------------------------------------------------------------------------------------------------------------------------------------------------------------------------------------------------------------------------|------|------|------|------|------|------|------|--|
| conservation | ●●●●●●●●●●●●●●●●●●●●●●●●●●●●●●●●●●●●●●●●●●●●●●●●●●●●●●●●●●●●●●●●●●●●●●●●●●●●●●●●●●●●●●●●●●●●●●●●●●●●●●●●●●●●●●●●●●●●●●●●●●●●●●●●●●●●●●●●●●●●●●●●●●●●●●●●●●●●●●●●●●●●●●●●●●●●●●●●●●●●●●●●●●●●●●●●●●●●●●●●●●●●●●●●●●●●●●●●●●●●●●●●●●●●●●●●●●●●●●●●●●●●●●●●●●●●●●●●●●●●●●●●●●●●●●●●●●●●●●●●●●●●●●●●●●●●●●●●●●●●●●●●●●●●●●●●●●●●●●●●●●●●●●●●●●●●●●●●●●●●●●●●●●●●●●●●●●●●●●●●●●●●●●●●●●●●●●●●●●●●●●●●●●●●●●●●●●●●●●●●●●●●●●●●●●●●●●●●●●●●●●●●●●●●●●●●●●●●●●●●●●●●●●●●●●●●●●●●●●●●●●●●●●●●●●●●●●●●●●●●●●●●●●●●●●●●●●●●●●●●●●●●●●●●●●●●●●●●●●●●●●●●●●●●●●●●●●●●●●●●●●●●●●●●●●●●●●●●●●●●●●●●●●●●●●●●●●●●●●●●●●●●●●●●●●●●●●●●●●●●●●●●●●●●●●●●●●●●●●●●●●●●●●●●●●●●●●●●●●●●●●●●●●●●●●●●●●●●●●●●●●●●●●●●●●●●●●●●●●●●●●●●●●●●●●●●●●●●●●●●●●●●●●●●●●●●●●●●●●●●●●●●●●●●●●●●●●●●●●●●●●●●●●●●●●●●●●●●●●●●●●●●●●●●●●●●●●●●●●●●●●●●●●●●●●●●●●●●●●●●●●●●●●●●●●●●●●●●●●●●●●●●●●●●●●●●●●●●●●●●●●●●●●●●●●●●●●●●●●●●●●●●●●●●●●●●●●●●●●●●●●●●●●●●●●●●●●●●●●●●●●●●●●●●●●●●●●●●●●●●●●●●●●●●●●●●●●●●●●●●●●●●●●●●●●●●●●●●●●●●●●●●●●●●●●●●●●●●●●●●●●●●●●●●●●●●●●●●●●●●●●●●●●●●●●●●●●●●●●●●●●●●●●●●●●●●●●●●●●●●●●●●●●●●●●●●●●●●●●●●●●●●●●●●●●●●●●●●●●●●●●●●●●●●●●●●●●●●●●●●●●●●●●●●●●●●●●●●●●●●●●●●●●●●●●●●●●●●●●●●●●●●●●●●●●●●●●●●●●●●●●●●●●●●●●●●●●●●●●●●●●●●●●●●●●●●●●●●●●●●●●●●●●●●●●●●●●●●●●●●●●●●●●●●●●●●●●●●●●●●●●●●●●●●●●●●●●●●●●●●●●●●●●●●●●●●●●●●●●●●●●●●●●●●●●●●●●●●●●●●●●●●●●●●●●●●●●●●●●●●●●●●●●●●●●●●●●●●●●●●●●●●●●●●●●●●●●●●●●●●●●●●●●●●●●●●●●●●●●●●●●●●●●●●●●●●●●●●●●●●●●●●●●●●●●●●●●●●●●●●●●●●●●●●●●●●●●●●●●●●●●●●●●●●●●●●●●●●●●●●●●●●●●●●●●●●●●●●●●●●●●●●●●●●●●●●●●●●●●●●●●●●●●●●●●●●●●●●●●●●●●●●●●●●●●●●●●●●●●●●●●●●●●●●●●●●●●●●●●●●●●●●●●●●●●●●●●●●●●●●●●●●●●●●●●●●●●●●●●●●●●●●●●●●●●●●●●●●●●●●●●●●●●●●●●●●●●●●●●●●●●●●●●●●●●●●●●●●●●●●●●●●●●●●●●●●●●●●●●●●●●●●●●●●●●●●●●●●●●●●●●●●●●●●●●●●●●●●●●●●●●●●●●●●●●●●●●●●●●●●●●●●●●●●●●●●●●●●●●●●●●●●●●●●●●●●●●●●●●●●●●●●●●●●●●●●●●●●●●●●●●●●●●●●●●●●●●●●●●●●●●●●●●●●●●●●●●●●●●●●●●●●●●●●●●●●●●●●●●●●●●●●●●●●●●●●●●●●●●●●●●●●●●●●●●●●●●●●●●●●●●●●●●●●●●●●●●●●●●●●●●●●●●●●●●●●●●●●●●●●●●●●●●●●●●●●●●●●●●●●●●●●●●●●●●●●●●●●●●●●●●●●●●●●●●●●●●●●●●●●●●●●●●●●●●●●●●●●●●●●●●●●●●●●●●●●●●●●●●●●●●●●●●●●●●●●●●●●●●●●●●●●●●●●●●●●●●●●●●●●●●●●●●●●●●●●●●●●●●●●●●●●●●●●●●●●●●●●●●●●●●●●●●●●●●●●●●●●●●●●●●●●●●●●●●●●●●●●●●●●●●●●●●●●●●●●●●●●●●●●●●●●●●●●●●●●●●●●●●●●●●●●●●●●●●●●●●●●●●●●●●●●●●●●●●●●●●●●●●●●●●●●●●●●●●●●●●●●●●●●●●●●●●●●●●●●●●●●●●●●●●●●●●●●●●●●●●●●●●●●●●●●●●●●●●●●●●●●●●●●●●●●●●●●●●●●●●●●●●●●●●●●●●●●●●●●●●●●●●●●●●●●●●●●●●●●●●●●●●●●●●●●●●●●●●●●●●●●●●●●●●●●●●●●●●●●●●●●●●●●●●●●●●●●●●●●●●●●●●●●●●●●●●●●●●●●●●●●●●●●●●●●●●●●●●●●●●●●●●●●●●●●●●●●●●●●●●●●●●●●●●●●●●●●●●●●●●●●●●●●●●●●●●●●●●●●●●●●●●●●●●●●●●●●●●●●●●●●●●●●●●●●●●●●●●●●●●●●●●●●●●●●●●●●●●●●●●●●●●●●●●●●●●●●●●●●●●●●●●●●●●●●●●●●●●●●●●●●●●●●●●●●●●●●●●●●●●●●●●●●●●●●●●●●●●●●●●●●●●●●●●●●●●●●●●●●●●●●●●●●●●●●●●●●●●●●●●●●●●●●●●●●●●●●●●●●●●●●●●●●●●●●●●●●●●●●●●●●●●●●●●●●●●●●●●●●●●●●●●●●●●●●●●●●●●●●●●●●●●●●●●●●●●●●●●●●●●●●●●●●●●●●●●●●●●●●●●●●●●●●●●●●●●●●●●●●●●●●●●●●●●●●●●●●●●●●●●●●●●●●●●●●●●●●●●●●●●●●●●●●●●●●●●●●●●●●●●●●●●●●●●●●●●●●●●●●●●●●●●●●●●●●●●●●●●●●●●●●●●●●●●●●●●●●●●●●●●●●●●●●●●●●●●●●●●●●●●●●●●●●●●●●●●●●●●●●●●●●●●●●●●●●●●●●●●●●●●●●●●●●●●●●●●●●●●●●●●●●●●●●●●●●●●●●●●●●●●●●●●●●●●●●●●●●●●●●●●●●●●●●●●●●●●●●●●●●●●●●●●●●●●●●●●●●●●●●●●●●●●●●●●●●●●●●●●●●●●●●●●●●●●●●●●●●●●●●●●●●●●●●●●●●●●●●●●●●●●●●●●●●●●●●●●●●●●●●●●●●●●●●●●●●●●●●●●●●●●●●●●●●●●●●●●●●●●●●●●●●●●●●●●●●●●●●●●●●●●●●●●●●●●●●●●●●●●●●●●●●●●●●●●●●●●●●●●●●●●●●●●●●●●●●●●●●●●●●●●●●●●●●●●●●●●●●●●●●●●●●●●●●●●●●●●●●●●●●●●●●●●●●●●●●●●●●●●●●●●●●●●●●●●●●●●●●●●●●●●●●●●●●●●●●●●●●●●●●●●●●●●●●●●●●●●●●●●●●●●●●●●●●●●●●●●●●●●●●●●●●●●●●●●●●●●●●●●●●●●●●●●●●●●●●●●●●●●●●●●●●●●●●●●●●●●●●●●●●●●●●●●●●●●●●●●●●●●●●●●●●●●●●●●●●●●●●●●●●●●●●●●●●●●●●●●●●●●●●●●●●●●●●●●●●●●●●●●●●●●●●●●●●●●●●●●●●●●●●●●●●●●●●●●●●●●●●●●●●●●●●●●●●●●●●●●●●●●●●●●●●●●●●●●●●●●●●●●●●●●●●●●●●●●●●●●●●●●●●●●●●●●●●●●●●●●●●●●●●●●●●●●●●●●●●●●●●●●●●●●●●●●●●●●●●●●●●●●●●●●●●●●●●●●●●●●●●●●●●●●●●●●●●●●●●●●●●●●●●●●●●●●●●●●●●●●●●●●●●●●●●●●●●●●●●●●●●●●●●●●●●●●●●●●●●●●●●●●●●●●●●●●●●●●●●●●●●●●●●●●●●●●●●●●●●●●●●●●●●●●●●●●●●●●●●●●●●●●●●●●●●●●●●●●●●●●●●●●●●●●●●●●●●●●●●●●●●●●●●●●●●●●●●●●●●●●●●●●●●●●●●●●●●●●●●●●●●●●●●●●●●●●●●●●●●●●●●●●●●●●●●●●●●●●●●●●●●●●●●●●●●●●●●●●●●●●●●●●●●●●●●●●●●●●●●●●●●●●●●●●●●●●●●●●●●●●●●●●●●●●●●●●●●●●●●●●●●●●●●●●●●●●●●●●●●●●●●●●●●●●●●●●●●●●●●●●●●●●●●●●●●●●●●●●●●●●●●●●●●●●●●●●●●●●●●●●●●●●●●●●●●●●●●●●●●●●●●●●●●●●●●●●●●●●●●●●●●●●●●●●●●●●●●●●●●●●●●●●●●●●●●●●●●●●●●●●●●●●●●●●●●●●●●●●●●●●●●●●●●●●●●●●●●●●●●●●●●●●●●●●●●●●●●●●●●●●●●●●●●●●●●●●●●●●●●●●●●●●●●●●●●●●●●●●●●●●●●●●●●●●●●●●●●●●●●●●●●●●●●●●●●●●●●●●●●●●●●●●●●●●●●●●●●●●●●●●●●●●●●●●●●●●●●●●●●●●●●●●●●●●●●●●●●●●●●●●●●●●●●●●●●●●●●●●●●●●●●●●●●●●●●●●●●●●●●●●●●●●●●●●●●●●●●●●●●●●●●●●●●●●●●●●●●●●●●●●●●●●●●●●●●●●●●●●●●●●●●●●●●●●●●●●●●●●●●●●●●●●●●●●●●●●●●●●●●●●●●●●●●●●●●●●●●●●●●●●●●●●●●●●●●●●●●●●●●●●●●●●●●●●●●●●●●●●●●●●●●●●●●●●●●●●●●●●●●●●●●●●●●●●●●●●●●●●●●●●●●●●●●●●●●●●●●●●●●●●●●●●●●●●●●●●●●●●●●●●●●●●●●●●●●●●●●●●●●●●●●●●●●●●●●●●●●●●●●●●●●●●●●●●●●●●●●●●●●●●●●●●●●●●●●●●●●●●●●●●●●●●●●●●●●●●●●●●●●●●●●●●●●●●●●●●●●●●●●●●●●●●●●●●●●●●●●●●●●●●●●●●●●●●●●●●●●●●●●●●●●●●●●●●●●●●●●●●●●●●●●●●●●●●●●●●●●●●●●●●●●●●●●●●●●●●●●●●●●●●●●●●●●●●●●●●●●●●●●●●●●●●●●●●●●●●●●●●●●●●●●●●●●●●●●●●●●●●●●●●●●●●●●●●●●●●●●●●●●●●●●●●●●●●●●●●●●●●●●●●●●●●●●●●●●●●●●●●●●●●●●●●●●●●●●●●●●●●●●●●●●●●●●●●●●●●●●●●●●●●●●●●●●●●●●●●●●●●●●●●●●●●●●●●●●●●●●●●●●●●●●●●●●●●●●●●●●●●●●●●●●●●●●●●●●●●●●●●●●●●●●●●●●●●●●●●●●●●●●●●●●●●●●●●●●●●●●●●●●●●●●●●●●●●●●●●●●●●●●●●●●●●●●●●●●●●●●●●●●●●●●●●●●●●●●●●●●●●●●●●●●●●●●●●●●●●●●●●●●●●●●●●●●●●●●●●●●●●●●●●●●●●●●●●●●●●●●●●●●●●●●●●●●●●●●●●●●●●●●●●●●●●●●●●●●●●●●●●●●●●●●●●●●●●●●●●●●●●●●●●●●●●●●●●●●●●●●●●●●●●●●●●●●●●●●●●●●●●●●●●●●●●●●●●●●●●●●●●●●●●●●●●●●●●●●●●●●●●●●●●●●●●●●●●●●●●●●●●●●●●●●●●●●●●●●●●●●●●●●●●●●●●●●●●●●●●●●●●●●●●●●●●●●●●●●●●●●●●●●●●●●●●●●●●●●●●●●●●●●●●●●●●●●●●●●●●●●●●●●●●●●●●●●●●●●●●●●●●●●●●●●●●●●●●●●●●●●●●●●●●●●●●●●●●●●●●●●●●●●●●●●●●●●●●●●●●●●●●●●●●●●●●●●●●●●●●●●●●●●●●●●●●●●●●●●●●●●●●●●●●●●●●●●●●●●●●●●●●●●●●●●●●●●●●●●●●●●●●●●●●●●●●●●●●●●●●●●●●●●●●●●●●●●●●●●●●●●●●●●●●●●●●●●●●●●●●●●●●●●●●●●●●●●●●●●●●●●●●●●●●●●●●●●●●●●●●●●●●●●●●●●●●●●●●●●●●●●●●●●●●●●●●●●●●●●●●●●●●●●●●●●●●●●●●●●●●●●●●●●●●●●●●●●●●●●●●●●●●●●●●●●●●●●●●●●●●●●●●●●●●●●●●●●●●●●●●●●●●●●●●●●●●●●●●●●●●●●●●●●●●●●●●●●●●●●●●●●●●●●●●●●●●●●●●●●●●●●●●●●●●●●●●●●●●●●●●●●●●●●●●●●●●●●●●●●●●●●●●●●●●●●●●●●●●●●●●●●●●●●●●●●●●●●●●●●●●●●●●●●●●●●●●●●●●●●●●●●●●●●●●●●●●●●●●●●●●●●●●●●●●●●●●●●●●●●●●●●●●●●●●●●●●●●●●●●●●●●●●●●●●●●●●●●●●●●●●●●●●●●●●●●●●●●●●●●●●●●●●●●●●●●●●●●●●●●●●●●●●●●●●●●●●●●●●●●●●●●●●●●●●●●●●●●●●●●●●●●●●●●●●●●●●●●●●●●●●●●●●●●●●●●●●●●●●●●●●●●●●●●●●●●●●●●●●●●●●●●●●●●●●●●●●●●●●●●●●●●●●●●●●●●●●●●●●●●●●●●●●●●●●●●●●●●●●●●●●●●●●●●●●●●●●●●●●●●●●●●●●●●●●●●●●●●●●●●●●●●●●●●●●●●●●●●●●●●●●●●●●●●●●●●●●●●●●●●●●●●●●●●●●●●●●●●●●●●●●●●●●●●●●●●●●●●●●●●●●●●●●●●●●●●●●●●●●●●●●●●●●●●●●●●●●●●●●●●●●●●●●●●●●●●●●●●●●●●●●●●●●●●●●●●●●●●●●●●●●●●●●●●●●●●●●●●●●●●●●●●●●●●●●●●●●●●●●●●●●●●●●●●●●●●●●●●●●●●●●●●●●●●●●●●●●●●●●●●●●●●●●●●●●●●●●●●●●●●●●●●●●●●●●●●●●●●●●●●●●●●●●●●●●●●●●●●●●●●●●●●●●●●●●●●●●●●●●●●●●●●●●●●●●●●●●●●●●●●●●●●●●●●●●●●●●●●●●●●●●●●●●●●●●●●●●●●●●●●●●●●●●●●●●●●●●●●●●●●●●●●●●●●●●●●●●●●●●●●●●●●●●●●●●●●●●●●●●●●●●●●●●●●●●●●●●●●●●●●●●●●●●●●●●●●●●●●●●●●●●●●●●●●●●●●●●●●●●●●●●●●●●●●●●●●●●●●●●●●●●●●●●●●●●●●●●●●●●●●●●●●●●●●●●●●●●●●●●●●●●●●●●●●●●●●●●●●●●●●●●●●●●●●●●●●●●●●●●●●●●●●●●●●●●●●●●●●●●●●●●●●●●●●●●●●●●●●●●●●●●●●●●●●●●●●●●●●●●●●●●●●●●●●●●●●●●●●●●●●●●●●●●●●●●●●●●●●●●●●●●●●●●●●●●●●●●●●●●●●●●●●●●●●●●●●●●●●●●●●●●●●●●●●●●●●●●●●●●●●●●●●●●●●●●●●●●●●●●●●●●●●●●●●●●●●●●●●●●●●●●●●●●●●●●●●●●●●●●●●●●●●●●●●●●●●●●●●●●●●●●●●●●●●●●●●●●●●●●●●●●●●●●●●●●●●●●●●●●●●●●●●●●●●●●●●●●●●●●●●●●●●●●●●●●●●●●●●●●●●●●●●●●●●●●●●●●●●●●●●●●●●●●●●●●●●●●●●●●●●●●●●●●●●●●●●●●●●●●●●●●●●●●●●●●●●●●●●●●●●●●●●●●●●●●●●●●●●●●●●●●●●●●●●●●●●●●●●●●●●●●●●●●●●●●●●●●●●●●●●●●●●●●●●●●●●●●●●●●●●●●●●●●●●●●●●●●●●●●●●●●●●●●●●●●●●●●●●●●●●●●●●●●●●●●●●●●●●●●●●●●●●●●●●●●●●●●●●●●●●●●●●●●●●●●●●●●●●●●●●●●●●●●●●●●●●●●●●●●●●●●●●●●●●●●●●●●●●●●●●●●●●●●●●●●●●●●●●●●●●●●●●●●●●●●●●●●●●●●●●●●●●●●●●●●●●●●●●●●●●●●●●●●●●●●●●●●●●●●●●●●●●●●●●●●●●●●●●●●●●●●●●●●●●●●●●●●●●●●●●●●●●●●●●●●●●●●●●●●●●●●●●●●●●●●●●●●●●●●●●●●●●●●●●●●●●●●●●●●●●●●●●●●●●●●●●●●●●●●●●●●●●●●●●●●●●●●●●●●●●●●●●●●●●●●●●●●●●●●●●●●●●●●●●●●●●●●●●●●●●●●●●●●●●●●●●●●●●●●●●●●●●●●●●●●●●●●●●●●●●●●●●●●●●●●●●●●●●●●●●●●●●●●●●●●●●●●●●●●●●●●●●●●●●●●●●●●●●●●●●●●●●●●●●●●●●●●●●●●●●●●●●●●●●●●●●●●●●●●●●●●●●●●●●●●●●●●●●●●●●●●●●●●●●●●●●●●●●●●●●●●●●●●●●●●●●●●●●●●●●●●●●●●●●●●●●●●●●●●●●●●●●●●●●●●●●●●●●●●●●●●●●●●●●●●●●●●●●●●●●●●●●●●●●●●●●●●●●●●●●●●●●●●●●●●●●●●●●●●●●●●●●●●●●●●●●●●●●●●●●●●●●●●●●●●●●●●●●●●●●●●●●●●●●●●●●●●●●●●●●●●●●●●●●●●●●●●●●●●●●●●●●●●●●●●●●●●●●●●●●●●●●●●●●●●●●●●●●●●●●●●●●●●●●●●●●●●●●●●●●●●●●●●●●●●●●●●●●●●●●●●●●●●●●●●●●●●●●●●●●●●●●●●●●●●●●●●●●●●●●●●●●●●●●●●●●●●●●●●●●●●●●●●●●●●●●●●●●●●●●●●●●●●●●●●●●●●●●●●●●●●●●●●●●●●●●●●●●●●●●●●●●●●●●●●●●●●●●●●●●●●●●●●●●●●●●●●●●●●●●●●●●●●●●●●●●●●●●●●●●●●●●●●●●●●●●●●●●●●●●●●●●●●●●●●●●●●●●●●●●●●●●●●●●●●●●●●●●●●●●●●●●●●●●●●●●●●●●●●●●●●●●●●●●●●●●●●●●●●●●●●●●●●●●●●●●●●●●●●●●●●●●●●●●●●●●●●●●●●●●●●●●●●●●●●●●●●●●●●●●●●●●●●●●●●●●●●●●●●●●●●●●●●●●●●●●●●●●●●●●●●●●●●●●●●●●●●●●●●●●●●●●●●●●●●●●●●●●●●●●●●●●●●●●●●●●●●●●●●●●●●●●●●●●●●●●●●●●●●●●●●●●●●●●●●●●●●●●●●●●●●●●●●●●●●●●●●●●●●●●●●●●●●●●●●●●●●●●●●●●●●●●●●●●●●●●●●●●●●●●●●●●●●●●●●●●●●●●●●●●●●●●●●●●●●●●●●●●●●●●●●●●●●●●●●●●●●●●●●●●●●●●●●●●●●●●●●●●●●●●●●●●●●●●●●●●●●●●●●●●●●●●●●●●●●●●●●●●●●●●●●●●●●●●●●●●●●●●●●●●●●●●●●●●●●●●●●●●●●●●●●●●●●●●●●●●●●●●●●●●●●●●●●●●●●●●●●●●●●●●●●●●●●●●●●●●●●●●●●●●●●●●●●●●●●●●●●●●●●●●●●●●●●●●●●●●●●●●●●●●●●●●●●●●●●●●●●●●●●●●●●●●●●●●●●●●●●●●●●●●●●●●●●●●●●●●●●●●●●●●●●●●●●●●●●●●●●●●●●●●●●●●●●●●●●●●●●●●●●●●●●●●●●●●●●●●●●●●●●●●●●●●●●●●●●●●●●●●●●●●●●●●●●●●●●●●●●●●●●●●●●●●●●●●●●●●●●●●●●●●●●●●●●●●●●●●●●●●●●●●●●●●●●●●●●●●●●●●●●●●●●●●●●●●●●●●●●●●●●●●●●●●●●●●●●●●●●●●●●●●●●●●●●●●●●●●●●●●●●●●●●●●●●●●●●●●●●●●●●●●●●●●●●●●●●●●●●●●●●●●●●●●●●●●●●●●●●●●●●●●●●●●●●●●●●●●●●●●●●●●●●●●●●●●●●●●●●●●●●●●●●●●●●●●●●●●●●●●●●●●●●●●●●●●●●●●●●●●●●●●●●●●●●●●●●●●●●●●●●●●●●●●●●●●●●●●●●●●●●●●●●●●●●●●●●●●●●●●●●●●●●●●●●●●●●●●●●●●●●●●●●●●●●●●●●●●●●●●●●●●●●●●●●●●●●●●●●●●●●●●●●●●●●●●●●●●●●●●●●●●●●●●●●●●●●●●●●●●●●●●●●●●●●●●●●●●●●●●●●●●●●●●●●●●●●●●●●●●●●●●●●●●●●●●●●●●●●●●●●●●●●●●●●●●●●●●●●●●●●●●●●●●●●●●●●●●●●●●●●●●●●●●●●●●●●●●●●●●●●●●●●●●●●●●●●●●●●●●●●●●●●●●●●●●●●●●●●●●●●●●●●●●●●●●●●●●●●●●●●●●●●●●●●●●●●●●●●●●●●●●●●●●●●●●●●●●●●●●●●●●●●●●●●●●●●●●●●●●●●●●●●●●●●●●●●●●●●●●●●●●●●●●●●●●●●●●●●●●●●●●●●●●●●●●●●●●●●●●●●●●●●●●●●●●●●●●●●●●●●●●●●●●●●●●●●●●●●●●●●●●●●●●●●●●●●●●●●●●●●●●●●●●●●●●●●●●●●●●●●●●●●●●●●●●●●●●●●●●●●●●●●●●●●●●●●●●●●●●●●●●●●●●●●●●●●●●●●●●●●●●●●●●●●●●●●●●●●●●●●●●●●●●●●●●●●●●●●●●●●●●●●●●●●●●●●●●●●●●●●●●●●●●●●●●●●●●●●●●●●●●●●●●●●●●●●●●●●●●●●●●●●●●●●●●●●●●●●●●●●●●●●●●●●●●●●●●●●●●●●●●●●●●●●●●●●●●●●●●●●●●●●●●●●●●●●●●●●●●●●●●●●●●●●●●●●●●●●●●●●●●●●●●●●●●●●●●●●●●●●●●●●●●●●●●●●●●●●●●●●●●●●●●●●●●●●●●●●●●●●●●●●●●●●●●●●●●●●●●●●●●●●●●●●●●●●●●●●●●●●●●●●●●●●●●●●●●●●●●●●●●●●●●●●●●●●●●●●●●●●●●●●●●●●●●●●●●●●●●●●●●●●●●●●●●●●●●●●●●●●●●●●●●●●●●●●●●●●●●●●●●●●●●●●●●●●●●●●●●●●●●●●●●●●●●●●●●●●●●●●●●●●●●●●●●●●●●●●●●●●●●●●●●●●●●●●●●●●●●●●●●●●●●●●●●●●●●●●●●●●●●●●●●●●●●●●●●●●●●●●●●●●●●●●●●●●●●●●●●●●●●●●●●●●●●●●●●●●●●●●●●●●●●●●●●●●●●●●●●●●●●●●●●●●●●●●●●●●●●●●●●●●●●●●●●●●●●●●●●●●●●●●●●●●●●●●●●●●●●●●●●●●●●●●●●●●●●●●●●●●●●●●●●●●●●●●●●●●●●●●●●●●●●●●●●●●●●●●●●●●●●●●●●●●●●●●●●●●●●●●●●●●●●●●●●●●●●●●●●●●●●●●●●●●●●●●●●●●●●●●●●●●●●●●●●●●●●●●●●●●●●●●●●●●●●●●●●●●●●●●●●●●●●●●●●●●●●●●●●●●●●●●●●●●●●●●●●●●●●●●●●●●●●●●●●●●●●●●●●●●●●●●●●●●●●●●●●●●●●●●●●●●●●●●●●●●●●●●●●●●●●●●●●●●●●●●●●●●●●●●●●●●●●●●●●●●●●●●●●●●●●●●●●●●●●●●●●●●●●●●●●●●●●●●●●●●●●●●●●●●●●●●●●●●●●●●●●●●●●●●●●●●●●●●●●●●●●●●●●●●●●●●●●●●●●●●●●●●●●●●●●●●●●●●●●●●●●●●●●●●●●●●●●●●●●●●●●●●●●●●●●●●●●●●●●●●●●●●●●●●●●●●●●●●●●●●●●●●●●●●●●●●●●●●●●●●●●●●●●●●●●●●●●●●●●●●●●●●●●●●●●●●●●●●●●●●●●●●●●●●●●●●●●●●●●●●●●●●●●●●●●●●●●●●●●●●●●●●●●●●●●●●●●●●●●●●●●●●●●●●●●●●●●●●●●●●●●●●●●●●●●●●●●●●●●●●●●●●●●●●●●●●●●●●●●●●●●●●●●●●●●●●●●●●●●●●●●●●●●●●●●●●●●●●●●●●●●●●●●●●●●●●●●●●●●●●●●●●●●●●●●●●●●●●●●●●●●●●●●●●●●●●●●●●●●●●●●●●●●●●●●●●●●●●●●●●●●●●●●●●●●●●●●●●●●●●●●●●●●●●●●●●●●●●●●●●●●●●●●●●●●●●●●●●●●●●●●●●●●●●●●●●●●●●●●●●●●●●●●●●●●●●●●●●●●●●●●●●●●●●●●●●●●●●●●●●●●●●●●●●●●●●●●●●●●●●●●●●●●●●●●●●●●●●●●●●●●●●●●●●●●●●●●●●●●●●●●●●●●●●●●●●●●●●●●●●●●●●●●●●●●●●●●●●●●●●●●●●●●●●●●●●●●●●●●●●●●●●●●●●●●●●●●●●●●●●●●●●●●●●●●●●●●●●●●●●●●●●●●●●●●●●●●●●●●●●●●●●●●●●●●●●●●●●●●●●●●●●●●●●●●●●●●●●●●●●●●●●●●●●●●●●●●●●●●●●●●●●●●●●●●●●●●●●●●●●●●●●●●●●●●●●●●●●●●●●●●●●●●●●●●●●●●●●●●●●●●●●●●●●●●●●●●●●●●●●●●●●●●●●●●●●●●●●●●●●●●●●●●●●●●●●●●●●●●●●●●●●●●●●●●●●●●●●●●●●●●●●●●●●●●●●●●●●●●●●●●●●●●●●●●●●●●●●●●●●●●●●●●●●●●●●●●●●●●●●●●●●●●●●●●●●●●●●●●●●●●●●●●●●●●●●●●●●●●●●●●●●●●●●●●●●●●●●●●●●● |      |      |      |      |      |      |      |  |

|              | 1860                                                                                                                                                                                                                                                                                                                                                                                                                                                                                                                                                                                                                                                                                                                                                                                                                                                                                                                                                                                                                                                                                                                                                                                                                                                                                                                                                                                                                                                                                                                                                                                                                                                                                                                                                                                                                                                                                                                                                                                                                                                                                                                                                                                                                                                                                                                                                                                                                                                                                                                                                                                                                                                                                                                                                                                                                                                                                                                                                                                                                                                                                                                                                                                                                                                                                                                                                                                                                                                                                                                                                                                                                                                                                                                                                                                                                                                                                                                                                                                                                                                                                                                                                                                                                                                                                                                                                                                                                                                                                                                                                                                                                                                                                                                                                                                                                                                                                                                                                                                                                                                                                                                                                                                                                                                                                                                                                                                                                                                                                                                                                                                                                                                                                                                                                                                                                                                                                                                                                                                                                                                                                                                                                                                                                                                                                                                                                                                                                                                                                                                                                                                                                                                                                                                                                                                                                                                                                                                                                                                                                                                                                                                                                                                                                                                                                                                                                                                                                                                                                                                                                                                                                                                                                                                                                                                                                                                                                                                                                                                                                                                                                                                                                                                                                                                                                                                                                                                                                                                                                                                                                                                                                                                                                                                                                                                                                                                                                                                                                                                                                                                                                                                                                                                                                                                                                                                                                                                                                                                                                                                                                                                                                                                                                                                                                                                                                                                                                                                                                                                                                                                                                                                                                                                                                                                                                                                                                                                                                                                                                                                                                                                                                                                                                                                                                                                                                                                                                                                                                                                                                                                                                                                                                                                                                                                                                                                                                                                                                                                                                                                                                                                                                                                                                                                                                                                                                                                                                                                                                                                                                                                                                                                                                                                                                                                                                                                                                                                                                                                                                                                                                                                                                                                                                                                                                                                            | 1870 | 1880 | 1890 | 1900 | 1910 | 1920 | 1930 |  |
|--------------|-------------------------------------------------------------------------------------------------------------------------------------------------------------------------------------------------------------------------------------------------------------------------------------------------------------------------------------------------------------------------------------------------------------------------------------------------------------------------------------------------------------------------------------------------------------------------------------------------------------------------------------------------------------------------------------------------------------------------------------------------------------------------------------------------------------------------------------------------------------------------------------------------------------------------------------------------------------------------------------------------------------------------------------------------------------------------------------------------------------------------------------------------------------------------------------------------------------------------------------------------------------------------------------------------------------------------------------------------------------------------------------------------------------------------------------------------------------------------------------------------------------------------------------------------------------------------------------------------------------------------------------------------------------------------------------------------------------------------------------------------------------------------------------------------------------------------------------------------------------------------------------------------------------------------------------------------------------------------------------------------------------------------------------------------------------------------------------------------------------------------------------------------------------------------------------------------------------------------------------------------------------------------------------------------------------------------------------------------------------------------------------------------------------------------------------------------------------------------------------------------------------------------------------------------------------------------------------------------------------------------------------------------------------------------------------------------------------------------------------------------------------------------------------------------------------------------------------------------------------------------------------------------------------------------------------------------------------------------------------------------------------------------------------------------------------------------------------------------------------------------------------------------------------------------------------------------------------------------------------------------------------------------------------------------------------------------------------------------------------------------------------------------------------------------------------------------------------------------------------------------------------------------------------------------------------------------------------------------------------------------------------------------------------------------------------------------------------------------------------------------------------------------------------------------------------------------------------------------------------------------------------------------------------------------------------------------------------------------------------------------------------------------------------------------------------------------------------------------------------------------------------------------------------------------------------------------------------------------------------------------------------------------------------------------------------------------------------------------------------------------------------------------------------------------------------------------------------------------------------------------------------------------------------------------------------------------------------------------------------------------------------------------------------------------------------------------------------------------------------------------------------------------------------------------------------------------------------------------------------------------------------------------------------------------------------------------------------------------------------------------------------------------------------------------------------------------------------------------------------------------------------------------------------------------------------------------------------------------------------------------------------------------------------------------------------------------------------------------------------------------------------------------------------------------------------------------------------------------------------------------------------------------------------------------------------------------------------------------------------------------------------------------------------------------------------------------------------------------------------------------------------------------------------------------------------------------------------------------------------------------------------------------------------------------------------------------------------------------------------------------------------------------------------------------------------------------------------------------------------------------------------------------------------------------------------------------------------------------------------------------------------------------------------------------------------------------------------------------------------------------------------------------------------------------------------------------------------------------------------------------------------------------------------------------------------------------------------------------------------------------------------------------------------------------------------------------------------------------------------------------------------------------------------------------------------------------------------------------------------------------------------------------------------------------------------------------------------------------------------------------------------------------------------------------------------------------------------------------------------------------------------------------------------------------------------------------------------------------------------------------------------------------------------------------------------------------------------------------------------------------------------------------------------------------------------------------------------------------------------------------------------------------------------------------------------------------------------------------------------------------------------------------------------------------------------------------------------------------------------------------------------------------------------------------------------------------------------------------------------------------------------------------------------------------------------------------------------------------------------------------------------------------------------------------------------------------------------------------------------------------------------------------------------------------------------------------------------------------------------------------------------------------------------------------------------------------------------------------------------------------------------------------------------------------------------------------------------------------------------------------------------------------------------------------------------------------------------------------------------------------------------------------------------------------------------------------------------------------------------------------------------------------------------------------------------------------------------------------------------------------------------------------------------------------------------------------------------------------------------------------------------------------------------------------------------------------------------------------------------------------------------------------------------------------------------------------------------------------------------------------------------------------------------------------------------------------------------------------------------------------------------------------------------------------------------------------------------------------------------------------------------------------------------------------------------------------------------------------------------------------------------------------------------------------------------------------------------------------------------------------------------------------------------------------------------------------------------------------------------------------------------------------------------------------------------------------------------------------------------------------------------------------------------------------------------------------------------------------------------------------------------------------------------------------------------------------------------------------------------------------------------------------------------------------------------------------------------------------------------------------------------------------------------------------------------------------------------------------------------------------------------------------------------------------------------------------------------------------------------------------------------------------------------------------------------------------------------------------------------------------------------------------------------------------------------------------------------------------------------------------------------------------------------------------------------------------------------------------------------------------------------------------------------------------------------------------------------------------------------------------------------------------------------------------------------------------------------------------------------------------------------------------------------------------------------------------------------------------------------------------------------------------------------------------------------------------------------------------------------------------------------------------------------------------------------------------------------------------------------------------------------------------------------------------------------------------------------------------------------------------------------------------------------------------------------------------------------------------------------------------------------------------------------------------------------------------------------------------------------------------------------------------------------------------------------------------------------------------------------------------------------------------------------------------------------------------------------------------------------------------------------------------------------------------------------------------------------------------------------------------------------------------------------------------------------------------------------------------------------------------------------------------------------------------------------------------------------------------------------------------------------------------------------------------------------------------------------------------------------------------------------------------------------------------|------|------|------|------|------|------|------|--|
| conservation | ●●●●●●●●●●●●●●●●●●●●●●●●●●●●●●●●●●●●●●●●●●●●●●●●●●●●●●●●●●●●●●●●●●●●●●●●●●●●●●●●●●●●●●●●●●●●●●●●●●●●●●●●●●●●●●●●●●●●●●●●●●●●●●●●●●●●●●●●●●●●●●●●●●●●●●●●●●●●●●●●●●●●●●●●●●●●●●●●●●●●●●●●●●●●●●●●●●●●●●●●●●●●●●●●●●●●●●●●●●●●●●●●●●●●●●●●●●●●●●●●●●●●●●●●●●●●●●●●●●●●●●●●●●●●●●●●●●●●●●●●●●●●●●●●●●●●●●●●●●●●●●●●●●●●●●●●●●●●●●●●●●●●●●●●●●●●●●●●●●●●●●●●●●●●●●●●●●●●●●●●●●●●●●●●●●●●●●●●●●●●●●●●●●●●●●●●●●●●●●●●●●●●●●●●●●●●●●●●●●●●●●●●●●●●●●●●●●●●●●●●●●●●●●●●●●●●●●●●●●●●●●●●●●●●●●●●●●●●●●●●●●●●●●●●●●●●●●●●●●●●●●●●●●●●●●●●●●●●●●●●●●●●●●●●●●●●●●●●●●●●●●●●●●●●●●●●●●●●●●●●●●●●●●●●●●●●●●●●●●●●●●●●●●●●●●●●●●●●●●●●●●●●●●●●●●●●●●●●●●●●●●●●●●●●●●●●●●●●●●●●●●●●●●●●●●●●●●●●●●●●●●●●●●●●●●●●●●●●●●●●●●●●●●●●●●●●●●●●●●●●●●●●●●●●●●●●●●●●●●●●●●●●●●●●●●●●●●●●●●●●●●●●●●●●●●●●●●●●●●●●●●●●●●●●●●●●●●●●●●●●●●●●●●●●●●●●●●●●●●●●●●●●●●●●●●●●●●●●●●●●●●●●●●●●●●●●●●●●●●●●●●●●●●●●●●●●●●●●●●●●●●●●●●●●●●●●●●●●●●●●●●●●●●●●●●●●●●●●●●●●●●●●●●●●●●●●●●●●●●●●●●●●●●●●●●●●●●●●●●●●●●●●●●●●●●●●●●●●●●●●●●●●●●●●●●●●●●●●●●●●●●●●●●●●●●●●●●●●●●●●●●●●●●●●●●●●●●●●●●●●●●●●●●●●●●●●●●●●●●●●●●●●●●●●●●●●●●●●●●●●●●●●●●●●●●●●●●●●●●●●●●●●●●●●●●●●●●●●●●●●●●●●●●●●●●●●●●●●●●●●●●●●●●●●●●●●●●●●●●●●●●●●●●●●●●●●●●●●●●●●●●●●●●●●●●●●●●●●●●●●●●●●●●●●●●●●●●●●●●●●●●●●●●●●●●●●●●●●●●●●●●●●●●●●●●●●●●●●●●●●●●●●●●●●●●●●●●●●●●●●●●●●●●●●●●●●●●●●●●●●●●●●●●●●●●●●●●●●●●●●●●●●●●●●●●●●●●●●●●●●●●●●●●●●●●●●●●●●●●●●●●●●●●●●●●●●●●●●●●●●●●●●●●●●●●●●●●●●●●●●●●●●●●●●●●●●●●●●●●●●●●●●●●●●●●●●●●●●●●●●●●●●●●●●●●●●●●●●●●●●●●●●●●●●●●●●●●●●●●●●●●●●●●●●●●●●●●●●●●●●●●●●●●●●●●●●●●●●●●●●●●●●●●●●●●●●●●●●●●●●●●●●●●●●●●●●●●●●●●●●●●●●●●●●●●●●●●●●●●●●●●●●●●●●●●●●●●●●●●●●●●●●●●●●●●●●●●●●●●●●●●●●●●●●●●●●●●●●●●●●●●●●●●●●●●●●●●●●●●●●●●●●●●●●●●●●●●●●●●●●●●●●●●●●●●●●●●●●●●●●●●●●●●●●●●●●●●●●●●●●●●●●●●●●●●●●●●●●●●●●●●●●●●●●●●●●●●●●●●●●●●●●●●●●●●●●●●●●●●●●●●●●●●●●●●●●●●●●●●●●●●●●●●●●●●●●●●●●●●●●●●●●●●●●●●●●●●●●●●●●●●●●●●●●●●●●●●●●●●●●●●●●●●●●●●●●●●●●●●●●●●●●●●●●●●●●●●●●●●●●●●●●●●●●●●●●●●●●●●●●●●●●●●●●●●●●●●●●●●●●●●●●●●●●●●●●●●●●●●●●●●●●●●●●●●●●●●●●●●●●●●●●●●●●●●●●●●●●●●●●●●●●●●●●●●●●●●●●●●●●●●●●●●●●●●●●●●●●●●●●●●●●●●●●●●●●●●●●●●●●●●●●●●●●●●●●●●●●●●●●●●●●●●●●●●●●●●●●●●●●●●●●●●●●●●●●●●●●●●●●●●●●●●●●●●●●●●●●●●●●●●●●●●●●●●●●●●●●●●●●●●●●●●●●●●●●●●●●●●●●●●●●●●●●●●●●●●●●●●●●●●●●●●●●●●●●●●●●●●●●●●●●●●●●●●●●●●●●●●●●●●●●●●●●●●●●●●●●●●●●●●●●●●●●●●●●●●●●●●●●●●●●●●●●●●●●●●●●●●●●●●●●●●●●●●●●●●●●●●●●●●●●●●●●●●●●●●●●●●●●●●●●●●●●●●●●●●●●●●●●●●●●●●●●●●●●●●●●●●●●●●●●●●●●●●●●●●●●●●●●●●●●●●●●●●●●●●●●●●●●●●●●●●●●●●●●●●●●●●●●●●●●●●●●●●●●●●●●●●●●●●●●●●●●●●●●●●●●●●●●●●●●●●●●●●●●●●●●●●●●●●●●●●●●●●●●●●●●●●●●●●●●●●●●●●●●●●●●●●●●●●●●●●●●●●●●●●●●●●●●●●●●●●●●●●●●●●●●●●●●●●●●●●●●●●●●●●●●●●●●●●●●●●●●●●●●●●●●●●●●●●●●●●●●●●●●●●●●●●●●●●●●●●●●●●●●●●●●●●●●●●●●●●●●●●●●●●●●●●●●●●●●●●●●●●●●●●●●●●●●●●●●●●●●●●●●●●●●●●●●●●●●●●●●●●●●●●●●●●●●●●●●●●●●●●●●●●●●●●●●●●●●●●●●●●●●●●●●●●●●●●●●●●●●●●●●●●●●●●●●●●●●●●●●●●●●●●●●●●●●●●●●●●●●●●●●●●●●●●●●●●●●●●●●●●●●●●●●●●●●●●●●●●●●●●●●●●●●●●●●●●●●●●●●●●●●●●●●●●●●●●●●●●●●●●●●●●●●●●●●●●●●●●●●●●●●●●●●●●●●●●●●●●●●●●●●●●●●●●●●●●●●●●●●●●●●●●●●●●●●●●●●●●●●●●●●●●●●●●●●●●●●●●●●●●●●●●●●●●●●●●●●●●●●●●●●●●●●●●●●●●●●●●●●●●●●●●●●●●●●●●●●●●●●●●●●●●●●●●●●●●●●●●●●●●●●●●●●●●●●●●●●●●●●●●●●●●●●●●●●●●●●●●●●●●●●●●●●●●●●●●●●●●●●●●●●●●●●●●●●●●●●●●●●●●●●●●●●●●●●●●●●●●●●●●●●●●●●●●●●●●●●●●●●●●●●●●●●●●●●●●●●●●●●●●●●●●●●●●●●●●●●●●●●●●●●●●●●●●●●●●●●●●●●●●●●●●●●●●●●●●●●●●●●●●●●●●●●●●●●●●●●●●●●●●●●●●●●●●●●●●●●●●●●●●●●●●●●●●●●●●●●●●●●●●●●●●●●●●●●●●●●●●●●●●●●●●●●●●●●●●●●●●●●●●●●●●●●●●●●●●●●●●●●●●●●●●●●●●●●●●●●●●●●●●●●●●●●●●●●●●●●●●●●●●●●●●●●●●●●●●●●●●●●●●●●●●●●●●●●●●●●●●●●●●●●●●●●●●●●●●●●●●●●●●●●●●●●●●●●●●●●●●●●●●●●●●●●●●●●●●●●●●●●●●●●●●●●●●●●●●●●●●●●●●●●●●●●●●●●●●●●●●●●●●●●●●●●●●●●●●●●●●●●●●●●●●●●●●●●●●●●●●●●●●●●●●●●●●●●●●●●●●●●●●●●●●●●●●●●●●●●●●●●●●●●●●●●●●●●●●●●●●●●●●●●●●●●●●●●●●●●●●●●●●●●●●●●●●●●●●●●●●●●●●●●●●●●●●●●●●●●●●●●●●●●●●●●●●●●●●●●●●●●●●●●●●●●●●●●●●●●●●●●●●●●●●●●●●●●●●●●●●●●●●●●●●●●●●●●●●●●●●●●●●●●●●●●●●●●●●●●●●●●●●●●●●●●●●●●●●●●●●●●●●●●●●●●●●●●●●●●●●●●●●●●●●●●●●●●●●●●●●●●●●●●●●●●●●●●●●●●●●●●●●●●●●●●●●●●●●●●●●●●●●●●●●●●●●●●●●●●●●●●●●●●●●●●●●●●●●●●●●●●●●●●●●●●●●●●●●●●●●●●●●●●●●●●●●●●●●●●●●●●●●●●●●●●●●●●●●●●●●●●●●●●●●●●●●●●●●●●●●●●●●●●●●●●●●●●●●●●●●●●●●●●●●●●●●●●●●●●●●●●●●●●●●●●●●●●●●●●●●●●●●●●●●●●●●●●●●●●●●●●●●●●●●●●●●●●●●●●●●●●●●●●●●●●●●●●●●●●●●●●●●●●●●●●●●●●●●●●●●●●●●●●●●●●●●●●●●●●●●●●●●●●●●●●●●●●●●●●●●●●●●●●●●●●●●●●●●●●●●●●●●●●●●●●●●●●●●●●●●●●●●●●●●●●●●●●●●●●●●●●●●●●●●●●●●●●●●●●●●●●●●●●●●●●●●●●●●●●●●●●●●●●●●●●●●●●●●●●●●●●●●●●●●●●●●●●●●●●●●●●●●●●●●●●●●●●●●●●●●●●●●●●●●●●●●●●●●●●●●●●●●●●●●●●●●●●●●●●●●●●●●●●●●●●●●●●●●●●●●●●●●●●●●●●●●●●●●●●●●●●●●●●●●●●●●●●●●●●●●●●●●●●●●●●●●●●●●●●●●●●●●●●●●●●●●●●●●●●●●●●●●●●●●●●●●●●●●●●●●●●●●●●●●●●●●●●●●●●●●●●●●●●●●●●●●●●●●●●●●●●●●●●●●●●●●●●●●●●●●●●●●●●●●●●●●●●●●●●●●●●●●●●●●●●●●●●●●●●●●●●●●●●●●●●●●●●●●●●●●●●●●●●●●●●●●●●●●●●●●●●●●●●●●●●●●●●●●●●●●●●●●●●●●●●●●●●●●●●●●●●●●●●●●●●●●●●●●●●●●●●●●●●●●●●●●●●●●●●●●●●●●●●●●●●●●●●●●●●●●●●●●●●●●●●●●●●●●●●●●●●●●●●●●●●●●●●●●●●●●●●●●●●●●●●●●●●●●●●●●●●●●●●●●●●●●●●●●●●●●●●●●●●●●●●●●●●●●●●●●●●●●●●●●●●●●●●●●●●●●●●●●●●●●●●●●●●●●●●●●●●●●●●●●●●●●●●●●●●●●●●●●●●●●●●●●●●●●●●●●●●●●●●●●●●●●●●●●●●●●●●●●●●●●●●●●●●●●●●●●●●●●●●●●●●●●●●●●●●●●●●●●●●●●●●●●●●●●●●●●●●●●●●●●●●●●●●●●●●●●●●●●●●●●●●●●●●●●●●●●●●●●●●●●●●●●●●●●●●●●●●●●●●●●●●●●●●●●●●●●●●●●●●●●●●●●●●●●●●●●●●●●●●●●●●●●●●●●●●●●●●●●●●●●●●●●●●●●●●●●●●●●●●●●●●●●●●●●●●●●●●●●●●●●●●●●●●●●●●●●●●●●●●●●●●●●●●●●●●●●●●●●●●●●●●●●●●●●●●●●●●●●●●●●●●●●●●●●●●●●●●●●●●●●●●●●●●●●●●●●●●●●●●●●●●●●●●●●●●●●●●●●●●●●●●●●●●●●●●●●●●●●●●●●●●●●●●●●●●●●●●●●●●●●●●●●●●●●●●●●●●●●●●●●●●●●●●●●●●●●●●●●●●●●●●●●●●●●●●●●●●●●●●●●●●●●●●●●●●●●●●●●●●●●●●●●●●●●●●●●●●●●●●●●●●●●●●●●●●●●●●●●●●●●●●●●●●●●●●●●●●●●●●●●●●●●●●●●●●●●●●●●●●●●●●●●●●●●●●●●●●●●●●●●●●●●●●●●●●●●●●●●●●●●●●●●●●●●●●●●●●●●●●●●●●●●●●●●●●●●●●●●●●●●●●●●●●●●●●●●●●●●●●●●●●●●●●●●●●●●●●●●●●●●●●●●●●●●●●●●●●●●●●●●●●●●●●●●●●●●●●●●●●●●●●●●●●●●●●●●●●●●●●●●●●●●●●●●●●●●●●●●●●●●●●●●●●●●●●●●●●●●●●●●●●●●●●●●●●●●●●●●●●●●●●●●●●●●●●●●●●●●●●●●●●●●●●●●●●●●●●●●●●●●●●●●●●●●●●●●●●●●●●●●●●●●●●●●●●●●●●●●●●●●●●●●●●●●●●●●●●●●●●●●●●●●●●●●●●●●●●●●●●●●●●●●●●●●●●●●●●●●●●●●●●●●●●●●●●●●●●●●●●●●●●●●●●●●●●●●●●●●●●●●●●●●●●●●●●●●●●●●●●●●●●●●●●●●●●●●●●●●●●●●●●●●●●●●●●●●●●●●●●●●●●●●●●●●●●●●●●●●●●●●●●●●●●●●●●●●●●●●●●●●●●●●●●●●●●●●●●●●●●●●●●●●●●●●●●●●●●●●●●●●●●●●●●●●●●●●●●●●●●●●●●●●●●●●●●●●●●●●●●●●●●●●●●●●●●●●●●●●●●●●●●●●●●●●●●●●●●●●●●●●●●●●●●●●●●●●●●●●●●●●●●●●●●●●●●●●●●●●●●●●●●●●●●●●●●●●●●●●●●●●●●●●●●●●●●●●●●●●●●●●●●●●●●●●●●●●●●●●●●●●●●●●●●●●●●●●●●●●●●●●●●●●●●●●●●●●●●●●●●●●●●●●●●●●●●●●●●●●●●●●●●●●●●●●●●●●●●●●●●●●●●●●●●●●●●●●●●●●●●●●●●●●●●●●●●●●●●●●●●●●●●●●●●●●●●●●●●●●●●●●●●●●●●●●●●●●●●●●●●●●●●●●●●●●●●●●●●●●●●●●●●●●●●●●●●●●●●●●●●●●●●●●●●●●●●●●●●●●●●●●●●●●●●●●●●●●●●●●●●●●●●●●●●●●●●●●●●●●●●●●●●●●●●●●●●●●●●●●●●●●●●●●●●●●●●●●●●●●●●●●●●●●●●●●●●●●●●●●●●●●●●●●●●●●●●●●●●●●●●●●●●●●●●●●●●●●●●●●●●●●●●●●●●●●●●●●●●●●●●●●●●●●●●●●●●●●●●●●●●●●●●●●●●●●●●●●●●●●●●●●●●●●●●●●●●●●●●●●●●●●●●●●●●●●●●●●●●●●●●●●●●●●●●●●●●●●●●●●●●●●●●●●●●●●●●●●●●●●●●●●●●●●●●●●●●●●●●●●●●●●●●●●●●●●●●●●●●●●●●●●●●●●●●●●●●●●●●●●●●●●●●●●●●●●●●●●●●●●●●●●●●●●●●●●●●●●●●●●●●●●●●●●●●●●●●●●●●●●●●●●●●●●●●●●●●●●●●●●●●●●●●●●●●●●●●●●●●●●●●●●●●●●●●●●●●●●●●●●●●●●●●●●●●●●●●●●●●●●●●●●●●●●●●●●●●●●●●●●●●●●●●●●●●●●●●●●●●●●●●●●●●●●●●●●●●●●●●●●●●●●●●●●●●●●●●●●●●●●●●●●●●●●●●●●●●●●●●●●●●●●●●●●●●●●●●●●●●●●●●●●●●●●●●●●●●●●●●●●●●●●●●●●●●●●●●●●●●●●●●●●●●●●●●●●●●●●●●●●●●●●●●●●●●●●●●●●●●●●●●●●●●●●●●●●●●●●●●●●●●●●●●●●●●●●●●●●●●●●●●●●●●●●●●●●●●●●●●●●●●●●●●●●●●●●●●●●●●●●●●●●●●●●●●●●●●●●●●●●●●●●●●●●●●●●●●●●●●●●●●●●●●●●●●●●●●●●●●●●●●●●●●●●●●●●●●●●●●●●●●●●●●●●●●●●●●●●●●●●●●●●●●●●●●●●●●●●●●●●●●●●●●●●●●●●●●●●●●●●●●●●●●●●●●●●●●●●●●●●●●●●●●●●●●●●●●●●●●●●●●●●●●●●●●●●●●●●●●●●●●●●●●●●●●●●●●●●●●●●●●●●●●●●●●●●●●●●●●●●●●●●●●●●●●●●●●●●●●●●●●●●●●●●●●●●●●●●●●●●●●●●●●●●●●●●●●●●●●●●●●●●●●●●●●●●●●●●●●●●●●●●●●●●●●●●●●●●●●●●●●●●●●●●●●●●●●●●●●●●●●●●●●●●●●●●●●●●●●●●●●●●●●●●●●●●●●●●●●●●●●●●●●●●●●●●●●●●●●●●●●●●●●●●●●●●●●●●●●●●●●●●●●●●●●●●●●●●●●●●●●●●●●●●●●●●●●●●●●●●●●●●●●●●●●●●●●●●●●●●●●●●●●●●●●●●●●●●●●●●●●●●●●●●●●●●●●●●●●●●●●●●●●●●●●●●●●●●●●●●●●●●●●●●●●●●●●●●●●●●●●●●●●●●●●●●●●●●●●●●●●●●●●●●●●●●●●●●●●●●●●●●●●●●●●●●●●●●●●●●●●●●●●●●●●●●●●●●●●●●●●●●●●●●●●●●●●●●●●●●●●●●●●●●●●●●●●●●●●●●●●●●●●●●●●●●●●●●●●●●●●●●●●●●●●●●●●●●●●●●●●●●●●●●●●●●●●●●●●●●●●●●●●●●●●●●●●●●●●●●●●●●●●●●●●●●●●●●●●●●●●●●●●●●●●●●●●●●●●●●●●●●●●●●●●●●●●●●●●●●●●●●●●●●●●●●●●●●●●●●●●●●●●●●●●●●●●●●●●●●●●●●●●●●●●●●●●●●●●●●●●●●●●●●●●●●●●●●●●●●●●●●●●●●●●●●●●●●●●●●●●●●●●●●●●●●●●●●●●●●●●●●●●●●●●●●●●●●●●●●●●●●●●●●●●●●●●●●●●●●●●●●●●●●●●●●●●●●●●●●●●●●●●●●●●●●●●●●●●●●●●●●●●●●●●●●●●●●●●●●●●●●●●●●●●●●●●●●●●●●●●●●●●●●●●●●●●●●●●●●●●●●●●●●●●●●●●●●●●●●●●●●●●●●●●●●●●●●●●●●●●●●●●●●●●●●●●●●●●●●●●●●●●●●●●●●●●●●●●●●●●●●●●●●●●●●●●●●●●●●●●●●●●●●●●●●●●●●●●●●●●●●●●●●●●●●●●●●●●●●●●●●●●●●●●●●●●●●●●●●●●●●●●●●●●●●●●●●●●●●●●●●●●●●●●●●●●●●●●●●●●●●●●●●●●●●●●●●●●●●●●●●●●●●●●●●●●●●●●●●●●●●●●●●●●●●●●●●●●●●●●●●●●●●●●●●●●●●●●●●●●●●●●●●●●●●●●●●●●●●●●●●●●●●●●●●●●●●●●●●●●●●●●●●●●●●●●●●●●●●●●●●●●●●●●●●●●●●●●●●●●●●●●●●●●●●●●●●●●●●●●●●●●●●●●●●●●●●●●●●●●●●●●●●●●●●●●●●●●●●●●●●●●●●●●●●●●●●●●●●●●●●●●●●●●●●●●●●●●●●●●●●●●●●●●●●●●●●●●●●●●●●●●●●●●●●●●●●●●●●●●●●●●●●●●●●●●●●●●●●●●●●●●●●●●●●●●●●●●●●●●●●●●●●●●●●●●●●●●●●●●●●●●●●●●●●●●●●●●●●●●●●●●●●●●●●●●●●●●●●●●●●●●●●●●●●●●●●●●●●●●●●●●●●●●●●●●●●●●●●●●●●●●●●●●●●●●●●●●●●●●●●●●●●●●●●●●●●●●●●●●●●●●●●●●●●●●●●●●●●●●●●●●●●●●●●●●●●●●●●●●●●●●●●●●●●●●●●●●●●●●●●●●●●●●●●●●●●●●●●●●●●●●●●●●●●●●●●●●●●●●●●●●●●●●●●●●●●●●●●●●●●●●●●●●●●●●●●●●●●●●●●●●●●●●●●●●●●●●●●●●●●●●●●●●●●●●●●●●●●●●●●●●●●●●●●●●●●●●●●●●●●●●●●●●●●●●●●●●●●●●●●●●●●●●●●●●●●●●●●●●●●●●●●●●●●●●●●●●●●●●●●●●●●●●●●●●●●●●●●●●●●●●●●●●●●●●●●●●●●●●●●●●●●●●●●●●●●●●●●●●●●●●●●●●●●●●●●●●●●●●●●●●●●●●●●●●●●●●●●●●●●●●●●●●●●●●●●●●●●●●●●●●●●●●●●●●●●●●●●●●●●●●●●●●●●●●●●●●●●●●●●●●●●●●●●●●●●●●●●●●●●●●●●●●●●●●●●●●●●●●●●●●●●●●●●●●●●●●●●●●●●●●●●●●●●●●●●●●●●●●●●●●●●●●●●●●●●●●●●●●●●●●●●●●●●●●●●●●●●●●●●●●●●●●●●●●●●●●●●●●●●●●●●●●●●●●●●●●●●●●●●●●●●●●●●●●●●●●●●●●●●●●●●●●●●●●●●●●●●●●●●●●●●●●●●●●●●●●●●●●●●●●●●●●●●●●●●●●●●●●●●●●●●●●●●●●●●●●●●●●●●●●●●●●●●●●●●●●●●●●●●●●●●●●●●●●●●●●●●●●●●●●●●●●●●●●●●●●●●●●●●●●●●●●●●●●●●●●●●●●●●●●●●●●●●●●●●●●●●●●●●●●●●●●●●●●●●●●●●●●●●●●●●●●●●●●●●●●●●●●●●●●●●●●●●●●●●●●●●●●●●●●●●●●●●●●●●●●●●●●●●●●●●●●●●●●●●●●●●●●●●●●●●●●●●●●●●●●●●●●●●●●●●●●●●●●●●●●●●●●●●●●●●●●●●●●●●●●●●●●●●●●●●●●●●●●●●●●●●●●●●●●●●●●●●●●●●●●●●●●●●●●●●●●●●●●●●●●●●●●●●●●●●●●●●●●●●●●●●●●●●●●●●●●●●●●●●●●●●●●●●●●●●●●●●●●●●●●●●●●●●●●●●●●●●●●●●●●●●●●●●●●●●●●●●●●●●●●●●●●●●●●●●●●●●●●●●●●●●●●●●●●●●●●●●●●●●●●●●●●●●●●●●●●●●●●●●●●●●●●●●●●●●●●●●●●●●●●●●●●●●●●●●●●●●●●●●●●●●●●●●●●●●●●●●●●●●●●●●●●●●●●●●●●●●●●●●●●●●●●●●●●●●●●●●●●●●●●●●●●●●●●●●●●●●●●●●●●●●●●●●●●●●●●●●●●●●●●●●●●●●●●●●●●●●●●●●●●●●●●●●●●●●●●●●●●●●●●●●●●●●●●●●●●●●●●●●●●●●●●●●●●●●●●●●●●●●●●●●●●●●●●●●●●●●●●●●●●●●●●●●●●●●●●●●●●●●●●●●●●●●●●●●●●●●●●●●●●●●●●●●●●●●●●●●●●●●●●●●●●●●●●●●●●●●●●●●●●●●●●●●●●●●●●●●●●●●●●●●●●●●●●●●●●●●●●●●●●●●●●●●●●●●●●●●●●●●●●●●●●●●●●●●●●●●●●●●●●●●●●●●●●●●●●●●●●●●●●●●●●●●●●●●●●●●●●●●●●●●●●●●●●●●●●●●●●●●●●●●●●●●●●●●●●●●●●●●●●●●●●●●●●●●●●●●●●●●●●●●●●●●●●●●●●●●●●●●●●●●●●●●●●●●●●●●●●●●●●●●●●●●●●●●●●●●●●●●●●●●●●●●●●●●●●●●●●●●●●●●●●●●●●●●●●●●●●●●●●●●●●●●●●●●●●●●●●●●●●●●●●●●●●●●●●●●●●●●●●●●●●●●●●●●●●●●●●●●●●●●●●●●●●●●●●●●●●●●●●●●●●●●●●●●●●●●●●●●●●●●●●●●●●●●●●●●●●●●●●●●●●●●●●●●●●●●●●●●●●●●●●●●●●●●●●●●●●●●●●●●●●●●●●●●●●●●●●●●●●●●●●●●●●●●●●●●●●●●●●●●●●●●●●●●●●●●●●●●●●●●●●●●●●●●●●●●●●●●●●●●●●●●●●●●●●●●●●●●●●●●●●●●●●●●●●●●●●●●●●●●●●●●●●●●●●●●●●●●●●●●●●●●●●●●●●●●●●●●●●●●●●●●●●●●●●●●●●●●●●●●●●●●●●●●●●●●●●●●●●●●●●●●●●●●●●●●●●●●●●●●●●●●●●●●●●●●●●●●●●●●●●●●●●●●●●●●●●●●●●●●●●●●●●●●●●●●●●●●●●●●●●●●●●●●●●●●●●●●●●●●●●●●●●●●●●●●●●●●●●●●●●●●●●●●●●●●●●●●●●●●●●●●●●●●●●●●●●●●●●●●●●●●●●●●●●●●●●●●●●●●●●●●●●●●●●●●●●●●●●●●●●●●●●●●●●●●●●●●●●●●●●●●●●●●●●●●●●●●●●●●●●●●●●●●●●●●●●●●●●●●●●●●●●●●●●●●●●●●●●●●●●●●●●●●●●●●●●●●●●●●●●●●●●●●●●●●●●●●●●●●●●●●●●●●●●●●●●●●●●●●●●●●●●●●●●●●●●●●●●●●●●●●●●●●●●●●●●●●●●●●●●●●●●●●●●●●●●●●●●●●●●●●●●●●●●●●●●●●●●●●●●●●●●●●●●●●●●●●●●●●●●●●●●●●●●●●●●●●●●●●●●●●●●●●●●●●●●●●●●●●●●●●●●●●●●●●●●●●●●●●●●●●●●●●●●●●●●●●●●●●●●●●●●●●●●●●●●●●●●●●●●●●●●●●●●●●●●●●●●●●●●●●●●●●●●●●●●●●●●●●●●●●●●●●●●●●●●●●●●●●●●●●●●●●●●●●●●●●●●●●●●●●●●●●●●●●●●●●●●●●●●●●●●●●●●●●●●●●●●●●●●●●●●●●●●●●●●●●●●●●●●●●●●●●●●●●●●●●●●●●●●●●●●●●●●●●●●●●●●●●●●●●●●●●●●●●●●●●●●●●●●●●●●●●●●●●●●●●●●●●●●●●●●●●●●●●●●●●●●●●●●●●●●●●●●●●●●●●●●●●●●●●●●●●●●●●●●●●●●●●●●●●●●●●●●●●●●●●●●●●●●●●●●●●●●●●●●●●●●●●●●●●●●●●●●●●●●●●●●●●●●●●●●●●●●●●●●●●●●●●●●●●●●●●●●●●●●●●●●●●●●●●●●●●●●●●●●●●●●●●●●●●●●●●●●●●●●●●●●●●●●●●●●●●●●●●●●●●●●●●●●●●●●●●●●●●●●●●●●●●●●●●●●●●●●●●●●●●●●●●●●●●●●●●●●●●●●●●●●●●●●●●●●●●●●●●●●●●●●●●●●●●●●●●●●●●●●●●●●●●●●●●●●●●●●●●●●●●●●●●●●●●●●●●●●●●●●●●●●●●●●●●●●●●●●●●●●●●● |      |      |      |      |      |      |      |  |

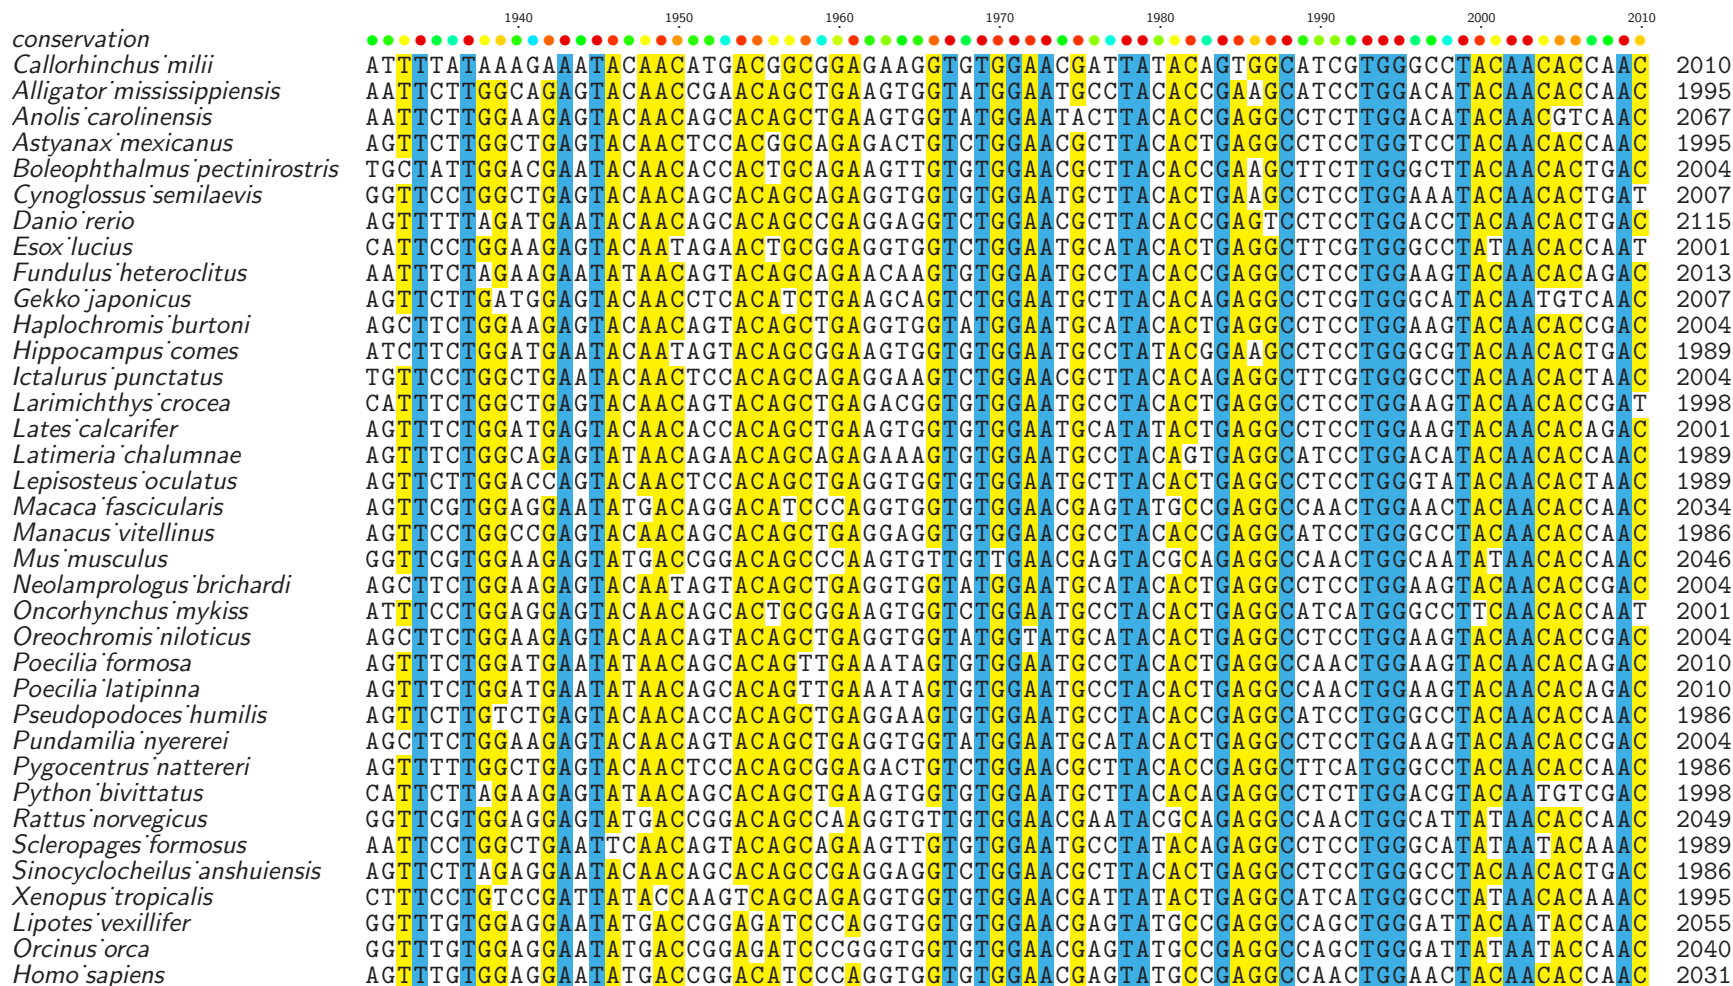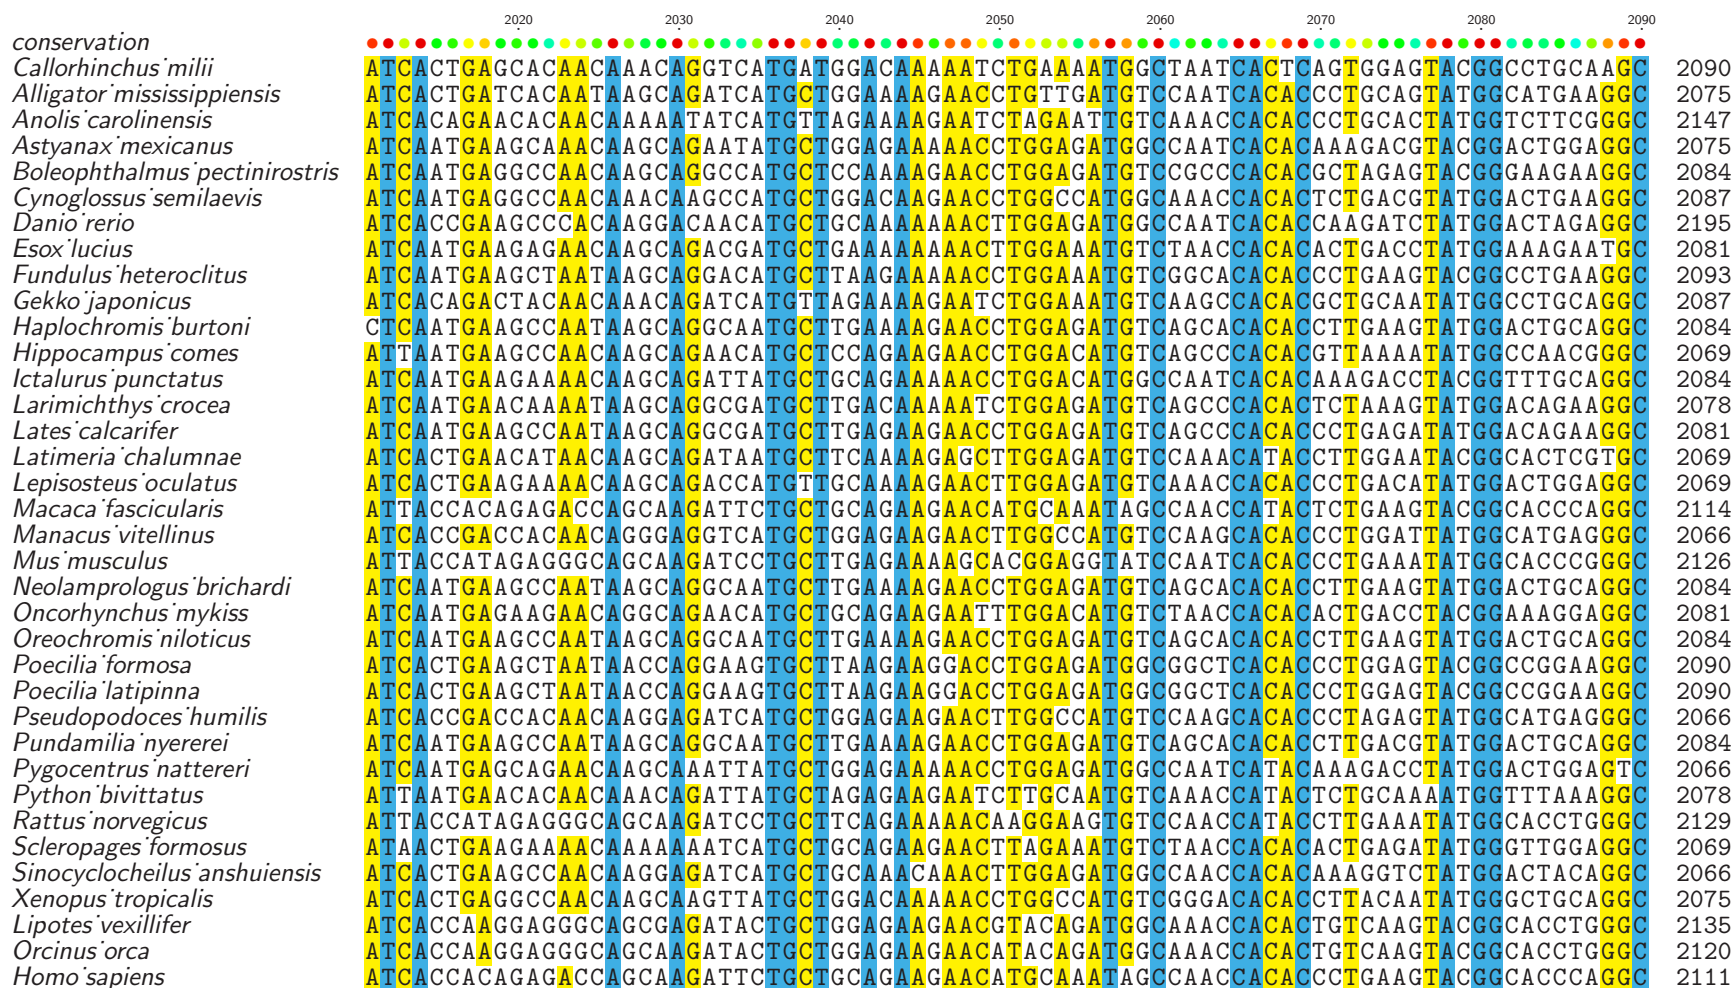









|                                      | 2410                     | 2420   | 2430   | 2440      | 2450           | 2460              | 2470        | 2480 |      |
|--------------------------------------|--------------------------|--------|--------|-----------|----------------|-------------------|-------------|------|------|
| conservation                         |                          |        |        |           |                |                   |             |      |      |
| <i>Callorhinchus milii</i>           | ACAAGGCGGCACGATTAATAATC  | ACGCA  | GATGCT | GGAGCTTT  | CTGGAGGTCGCT   | TGATGATTCTGAAA    | CATTTGAGGCA |      | 2487 |
| <i>Alligator mississippiensis</i>    | ACAAGGCAGCCAGACTCAATGGTC | ATGCT  | GACAAT | GGTGCCTT  | CTGGAGATCCCT   | CTATGAAACACCCAC   | CTTTGAAGAG  |      | 2472 |
| <i>Anolis carolinensis</i>           | ATAAGGCTGCCAGACTAAATGGTC | ATGCA  | GACAAT | GGTGCTTT  | CTGGAGATCACT   | TATATGAAACACAGCT  | TTTGAAGAA   |      | 2544 |
| <i>Astyanax mexicanus</i>            | ATTTGGCTGCCCGCAGTAACGGTC | ATGCT  | GACAAT | GGGGCTTT  | CTGGCGTTCCCT   | TATATGAAACCCCACT  | TTTGAAGAG   |      | 2472 |
| <i>Boleophthalmus pectinirostris</i> | ACAAGGCTGCCACACTCAATGGTC | ACAGT  | GATAAC | GGGGCATT  | CTGGCGCTCTCT   | CTATGAAACTCCCACT  | TTTGAACAA   |      | 2481 |
| <i>Cynoglossus semilaevis</i>        | ATAAAGCTGCCAAACTCAACGGTC | ACCCT  | GATAAC | GGAGCTTT  | CTGGCGTTCCCT   | TGATGAATCCCCAACCT | TTTGAACAA   |      | 2484 |
| <i>Danio rerio</i>                   | ACTCCGCTGCTAAAAGCAATGGTC | ACACT  | GATAAC | GGAGCATT  | CTGGCGCTCGCT   | TGATGAGACTCCCACT  | TTTGAACAG   |      | 2592 |
| <i>Esox lucius</i>                   | ATAAAGCTGCCACACTTAATGGAC | ACTCT  | GACAAT | GGAGCATT  | TTTGGCGCTCCCT  | TGATGAGACCCCACT   | TTTGAAGAG   |      | 2478 |
| <i>Fundulus heteroclitus</i>         | ATAAAGCTGCCACACTCAATGGTC | ATTCT  | GATAAT | GGGGCTTT  | CTGGCGGTCCCT   | TGACGAAACTCCTACCT | TTTGAAGAG   |      | 2490 |
| <i>Gekko japonicus</i>               | ATAAAGCTGCCACACTGAATGGC  | ATGCA  | GACAGC | GGTGCTTT  | CTGGAGGTCTCT   | TGATGAATACCCCACT  | TTTGAAGCG   |      | 2484 |
| <i>Haplochromis burtoni</i>          | ACAAGGCTGCCACACTAAATGGTC | ACTCT  | GATAAT | GGAGCTTT  | CTGGCGTTCCCT   | TGATGAAACGCCCTA   | CTTTGAAGAA  |      | 2481 |
| <i>Hippocampus comes</i>             | ACCAAGCTGCCAGACTCAACGGTC | ACAGC  | GACAAC | GGTGCTTT  | CTGGCGCTCGCT   | TGACGAAACGCCGAC   | CTTTGAGGAG  |      | 2466 |
| <i>Ictalurus punctatus</i>           | ACTTAGCTGCCAGGAGTAACGGTC | ACGCT  | GACAAT | GGCGCTTT  | CTGGCGCTCTTT   | TGACGAAACACCCACT  | TTTGAAGAG   |      | 2481 |
| <i>Larimichthys crocea</i>           | ACAAGGCTGCCACACTCAATGGAC | ACTCT  | GACAAT | GGGGCTTT  | CTGGCGTTCCCT   | TGATGAAACCCCTA    | CTTTGAAGAA  |      | 2475 |
| <i>Lates calcarifer</i>              | ACAAGGCAGCAACACTCAATGGTC | ACCCT  | GATAAT | GGAGCTTT  | CTGGCGCTCCCT   | TGATGAGACCCCTAC   | CTTTGAAGAA  |      | 2478 |
| <i>Latimeria chalumnae</i>           | ACAAGGCAGCAAGACTGAATGGCC | ATCCA  | GATAAT | GGAGCCTTT | TGGCGATCCCT    | TTATGAGTCTCCAACT  | TTTGAAGCT   |      | 2466 |
| <i>Lepisosteus oculatus</i>          | ACAAGCAGCCAGACTGAATGGTC  | ACCCC  | GACAAT | GGGGCTAC  | TGGCGCTCGCT    | CTACGAGACGCCACCT  | TTTGAAGAG   |      | 2466 |
| <i>Macaca fascicularis</i>           | ACCAGGCTGCCCGGCTCAATGGCT | ATGTA  | GATGCC | GGGACATT  | CTGGAGGTCTAT   | TGACGAGACCCAT     | CCCTGGAGCAA |      | 2511 |
| <i>Manacus vitellinus</i>            | ACAAGGCAGCCGTGCTCAATGGTT | ACACA  | GACAAT | GGGGCCTA  | CTGGAGATCCCT   | TGATGAGACATCCACCT | TTTGAAGAA   |      | 2463 |
| <i>Mus musculus</i>                  | ACAAGATTGCCAAGCTCAATGGCT | ACACG  | GATGCA | GGGGATT   | CTATGGAGATCCCT | TATACGAGTCTGACA   | ACCTGGAGCAA |      | 2523 |
| <i>Neolamprologus brichardi</i>      | ACAAGGCTGCCACACTAAATGGTC | ACTCT  | GATAAT | GGAGCTTT  | CTGGCGTTCCCT   | TGATGAAATGCCCTA   | CTTTGAAGAA  |      | 2481 |
| <i>Oncorhynchus mykiss</i>           | ACAAGGCTGCTGCGCTTAACGGC  | ACTCT  | GACAAT | GGGGCGTT  | CTGGCGTCCCAT   | TGACGAGACCCACT    | CTTTGAAGAG  |      | 2478 |
| <i>Oreochromis niloticus</i>         | ACAAGGCTGCCACACTAAATGGTC | ACTCT  | GATAAT | GGAGCTTT  | CTGGCGTTCCCT   | TGATGAAACGCCCTA   | CTTTGAAGAA  |      | 2481 |
| <i>Poecilia formosa</i>              | ATAAGGCTGCCACACTCAATGGC  | ATTCT  | GATAAT | GGGGCTTT  | CTGGCGGTCCCT   | TGATGAAACCCCACT   | TTTGAAGAG   |      | 2487 |
| <i>Poecilia latipinna</i>            | ATAAGGCTGCCACACTCAATGGC  | ATTCT  | GATAAT | GGGGCTTT  | CTGGCGGTCCCT   | TGATGAAACCCCACT   | TTTGAAGAG   |      | 2487 |
| <i>Pseudopodoces humilis</i>         | ACAAGGCAGCCATGCTCAATGGCT | ACAAA  | GACAAT | GGGGCCTA  | CTGGAGATCCCT   | TGATGAGACATCCACCT | TTTGAAGAA   |      | 2463 |
| <i>Pundamilia nyererei</i>           | ACAAGGCTGCCACACTAAATGGTC | ACTCT  | GATAAT | GGAGCTTT  | CTGGCGTTCCCT   | TGATGAAACGCCCTA   | CTTTGAAGAA  |      | 2481 |
| <i>Pygocentrus nattereri</i>         | ACTTGCTGCCCGCAGTAACGGTC  | ACATT  | GACAAC | GGGGCATT  | CTGGCGCTCCCT   | TATACGAAACCCCACT  | TTTGAAGAA   |      | 2463 |
| <i>Python bivittatus</i>             | ATAAGGCTGCCAGATTAATGGAC  | ATGCA  | GACAAT | GGTGCTTT  | CTGGAGATCCCT   | TTATGAAACTCCAACT  | TTTGAAGAA   |      | 2475 |
| <i>Rattus norvegicus</i>             | ACAAGATGCCAAGCTCAACGGCT  | ACTCT  | GATGCA | GGGGATT   | CCTGGAGATCCT   | CATATGAGTCCGACGAC | TTGGAGCAA   |      | 2526 |
| <i>Scleropages formosus</i>          | ACAAGGCTGCTAGACTTAATGGTC | ATGCT  | GACAAT | GGGGCATT  | CTGGCGCTCCCT   | TGATGAGACAAACAACT | TTTGAAGAG   |      | 2466 |
| <i>Sinocyclocheilus anshuiensis</i>  | ACTTAGCTGCCAAGAGCAATGGTC | ACACG  | GATAAT | GGGGATT   | TTGGCGTTCCCT   | TGATGAGACCCCACT   | TTTGAAGAG   |      | 2463 |
| <i>Xenopus tropicalis</i>            | ACAAGCTGCCACAGCTCAATGGTT | ACAAAT | GACAAT | GGAGCATA  | CTGGAGATCTTG   | GATGAGACCCCACT    | TTTGAATCA   |      | 2475 |
| <i>Lipotes vexillifer</i>            | ACAAGGCTGCCAGGCTCAATGGCT | ACGAG  | GACGGA | GGGGACTC  | CTGGAGATCTAT   | TGACGAGATGCCATT   | CCTGGAGTAT  |      | 2532 |
| <i>Orcinus orca</i>                  | ACAAGGCTGCCAGGCTCAATGGCT | ACAAG  | GACGGA | GGGGACTC  | CTGGAGATCTAT   | TGACGAGATGCCATT   | CCTGGAGTAC  |      | 2517 |
| <i>Homo sapiens</i>                  | ACCAGGCTGCCCGGCTCAATGGCT | ATGTA  | GATGCA | GGGGACTC  | GTTGGAGGTCTAT  | TGACGAGACACCAT    | CCCTGGAGCAA |      | 2508 |

|                                      | 2490                     | 2500       | 2510    | 2520      | 2530     | 2540         | 2550       | 2560             |      |
|--------------------------------------|--------------------------|------------|---------|-----------|----------|--------------|------------|------------------|------|
| conservation                         |                          |            |         |           |          |              |            |                  |      |
| <i>Callorhinchus milii</i>           | GATTGGAGAGGATTTACAAACCAG | CTCCAGCCT  | CTATACT | TGAATCT   | GCATGCT  | TATGTCCGACGT | GGATTGT    | ATCAGAA          | 2567 |
| <i>Alligator mississippiensis</i>    | GACCTAGAGAAGCTCTACCTGCA  | ACTGCAGCC  | CTGTAC  | CTCAACCTT | CATGCC   | TATGTGCGCCG  | GACCCCT    | CTACAACAA        | 2552 |
| <i>Anolis carolinensis</i>           | GATCTAGAGAGGATCTGCCTGCA  | CTTGCAT    | TGTACT  | TCAATTT   | TACAT    | GCCTATGTAC   | GTGCGGCT   | CTCTACAAAAA      | 2624 |
| <i>Astyanax mexicanus</i>            | GATCTGGAAGCATATGGAAAGAT  | CTACAGCCG  | CTCTAC  | CTCAATCTT | CACTCT   | TACGTCCGCGG  | TGCCCT     | CTTCAAAAA        | 2552 |
| <i>Boleophthalmus pectinirostris</i> | GACCTGGAGGCGCTGTGGAAGAG  | CTGGAGCCA  | CTCTAT  | CACAACG   | TGCACG   | CCATATGTCCG  | CCCGGCACT  | CTACAAGAA        | 2561 |
| <i>Cynoglossus semilaevis</i>        | GACCTGGAGACTCTGTGGTTGGAG | CTGGAGCCA  | CTCTAC  | CAGAACG   | TCCACG   | CTTATGTCCG   | TAGAGCTTT  | TGACAAAAA        | 2564 |
| <i>Danio rerio</i>                   | GATCTGGAGGCTTGTGGAAGAT   | CTAGAACCG  | CTCTAC  | CTCAGCG   | TTTCAT   | GCTTATGTG    | CGCAGGCACT | GTACAAGAA        | 2672 |
| <i>Esox lucius</i>                   | GATCTTGAGTCTCTCTGGAAGGAG | CTTGAAACCC | CTCTAT  | CTCAATG   | TACACG   | CATATGTG     | CGCAGGTC   | CCCTCTATAAGAA    | 2558 |
| <i>Fundulus heteroclitus</i>         | GACCTGGAGGCTCTGTGGAAGGAG | CTGGAGCCA  | CTCTAC  | CTCAATG   | TGCATG   | CCATATGTT    | CGAAGGG    | CTCTTCAAAAA      | 2570 |
| <i>Gekko japonicus</i>               | GACCTGGAGAGGATCTGGCAGCA  | ACTTCAGCC  | GTTATAC | CTCAACT   | TGCACG   | CCATACGTG    | CGCAGGG    | CACTCCACAAGAC    | 2564 |
| <i>Haplochromis burtoni</i>          | GATCTGGAGACTCTGTGGAAGAG  | CTGGAGCCA  | CTCTAT  | CTAAACT   | TGCATG   | CTTATGTT     | CGAAGGG    | GTCTATATAATAA    | 2561 |
| <i>Hippocampus comes</i>             | GACCTGGAGAGACTGTGGAAGAA  | CTTGAGCCG  | CTCTAC  | CTGAACG   | TGCAC    | CTCTATGTT    | CGCAGGG    | GTCTGTACAACAA    | 2546 |
| <i>Ictalurus punctatus</i>           | GATTTGGAGGCGTTATGGAAGAG  | CTACAGCCG  | CTCTAT  | CTCAACCT  | TCCAT    | CGGTATGT     | CCGAGAG    | CACTCTTCAAAAA    | 2561 |
| <i>Larimichthys crocea</i>           | GACCTGGAGACTCTCTGGAAGAG  | CTGGAGCCA  | CTCTAT  | CAGAAAT   | TGTCAT   | GATATGTT     | CGCAGAG    | CTTTGTACAAGAA    | 2555 |
| <i>Lates calcarifer</i>              | GACCTGGAGTCCCTGTGGAAGGAG | CTGGAGCCG  | CTTTAT  | CAGAACG   | TGCATG   | CTTATGTT     | CGTAGAG    | CTTTGTACAAGAA    | 2558 |
| <i>Latimeria chalumnae</i>           | GACCTGGAAAACTCTATCATCAG  | CTACAGCCC  | CTGTAC  | CTCAACCT  | TCCAT    | GCTTATGT     | CCGTCAGG   | CACTCCACAGAAA    | 2546 |
| <i>Lepisosteus oculatus</i>          | GACCTGGAGAGGCTGTACAGGAG  | ATGCAAGCC  | CTCTAC  | CTCAACT   | TGCACG   | CCATATGTG    | CGCAAG     | CCCCCTGTACAAGAA  | 2546 |
| <i>Macaca fascicularis</i>           | GACCTGGAGGCGCTCTTCCAGGAG | CTGCAGCCG  | CTGTAC  | CTGAACCT  | TGCATG   | CCATATGTG    | CGCGGG     | CCCCCTGCACGCCA   | 2591 |
| <i>Manacus vitellinus</i>            | GATCTGGAGAGGCTGTACAGCAG  | CTGCAGCCC  | CTGTAC  | CTCAACCT  | TGCACG   | CCATACGTG    | CGCGGG     | CCCCCTCTACAAGAA  | 2543 |
| <i>Mus musculus</i>                  | GACCTGGAAAACTGTACAGGAG   | CTGCAGCCA  | CTCTAC  | CTGAACCT  | TGCATG   | CCATATGTG    | CGTCTG     | TTCCTGCACGCCA    | 2603 |
| <i>Neolamprologus brichardi</i>      | GATCTGGAGACTCTGTGGAAGGAG | CTGGAGCCA  | CTCTAT  | CTAAACT   | TGCATG   | CTTATGTT     | CGAAGGG    | GTCTATATAATAA    | 2561 |
| <i>Oncorhynchus mykiss</i>           | GATCTGGAGCATCTGTGGAAGGAG | CTGGAGCCG  | CTCTAT  | CTCAATG   | TGCACG   | CCATACGTG    | CGCAGGT    | CTCTTTACAGGAA    | 2558 |
| <i>Oreochromis niloticus</i>         | GATCTGGAGACTCTGTGGAAGGAG | CTGGAGCCA  | CTCTAT  | CTGAACCT  | TGCATG   | CTTATGTT     | CGAAGGG    | GTCTATATAATAA    | 2561 |
| <i>Poecilia formosa</i>              | GACCTGGAGGCTCTGTGGAAGGAA | CTGGAGCCG  | CTCTAT  | CTCAACG   | TACACG   | CCATACGTT    | CGAAGGG    | CTCTTTACAAGAA    | 2567 |
| <i>Poecilia latipinna</i>            | GACCTGGAGGCTCTGTGGAAGGAA | CTGGAGCCG  | CTCTAT  | CTCAACG   | TACACG   | CCATACGTT    | CGAAGGG    | CTCTTTACAAGAA    | 2567 |
| <i>Pseudopodoces humilis</i>         | GATCTGGAGAGGCTGTATCTGCAG | CTGCAGCCC  | CTGTAC  | CTCAACCT  | TACATG   | CTTATGT      | ACGCCG     | AGCCCTCTACAAGAA  | 2543 |
| <i>Pundamilia nyererei</i>           | GATCTGGAGAGCTTGTGGAAGGAG | CTGGAGCCA  | CTCTAT  | CTAAACT   | TGCATG   | CTTATGTT     | CGAAGGG    | GTCTATATAATAA    | 2561 |
| <i>Pygocentrus nattereri</i>         | GACCTGGAGGCTTATGGAAGAA   | CTTAGAGCC  | CTCTAC  | CTCAACT   | TGCACACT | TATGTCCG     | CCCGGCT    | CTCTTTAAAAA      | 2543 |
| <i>Python bivittatus</i>             | GACCTGGAGAACATCTGGCATCAG | CTTCAACCA  | TTTACT  | CTCAATG   | TGCATG   | CTTATGT      | ACGTGCG    | CGGCTTTATACAAGAA | 2555 |
| <i>Rattus norvegicus</i>             | GACCTGGAAAACTATACAGGAG   | CTGCAGCCG  | CTCTAC  | CTGAACCT  | TGCATG   | CCATATGTG    | CGCGG      | CTCCCTGCACGCCA   | 2606 |
| <i>Scleropages formosus</i>          | GATCTTGAGAGACTGTGGAAGGAG | CTTGAGCCA  | CTCTAT  | CTCAATG   | TGCATG   | CATATGTT     | CGCAGAG    | TGCTCTTTAAACA    | 2546 |
| <i>Sinocyclocheilus anshuiensis</i>  | GATCTAGAGGCCTTGTGGAAGAT  | CTAGAGCCG  | CTCTAC  | CTCAACCT  | TTCATG   | CTTATGTG     | CGCAGG     | GCACTGTACAAGAA   | 2543 |
| <i>Xenopus tropicalis</i>            | GATGTTGAGAACTTTATGACGAG  | TTCAGCC    | CTCTAC  | CTCAATT   | TGCATG   | CATATGTG     | CGCAGG     | GCTCTTTACAAGAA   | 2555 |
| <i>Lipotes vexillifer</i>            | GACCTGGAGCAGCTTTCCAGGAG  | TTCAGCC    | CTCTAC  | CTGAACCT  | TGCACG   | CCATACGTG    | CGCGG      | GGCCCTGTATCGCTT  | 2612 |
| <i>Orcinus orca</i>                  | GAGCTGGAGCAGCTTTCCAGGAG  | TTCAGCC    | CTCTAC  | CTGAACCT  | TGCACG   | CCATACGTG    | CGCGG      | GGCGCTGTATCGCTT  | 2597 |
| <i>Homo sapiens</i>                  | GACCTGGAGCGGCTTTCCAGGAG  | TTCAGCC    | CTCTAC  | CTCAACCT  | TGCATG   | CCATACGTG    | CGCGG      | GGCCCTGCACGGTCA  | 2588 |

| conservation                         | 2570                              | 2580                  | 2590                  | 2600     | 2610 | 2620 | 2630 | 2640 |      |
|--------------------------------------|-----------------------------------|-----------------------|-----------------------|----------|------|------|------|------|------|
| <i>Callorhinchus milii</i>           | GTACGGAGATAAATACATCAACCTTAAGGGCC  | ATAAATCCAGGCTCACTTAT  | TAGGAACATGTGGGCCAGT   | GTGG     | AATA |      |      |      | 2647 |
| <i>Alligator mississippiensis</i>    | ATATGGGAAGGAGTACATCAACCTTGAAGGGCC | ATCCAGGCCACCTGCT      | TAGGAACATGTGGGCCAGT   | CATGGT   | CTG  |      |      |      | 2632 |
| <i>Anolis carolinensis</i>           | ATATGGAGCAGATCACATCAATCTCAAGGGCC  | ATCCAGGCTCATTACT      | TAGGAACATGTGGGCCAGT   | CATGGG   | CAA  |      |      |      | 2704 |
| <i>Astyanax mexicanus</i>            | GTACGGAGCGAAGCGATCAACCTCAAGGGCC   | ATCCAGGCTCATTACT      | TAGGAACATGTGGGCCAAAC  | GTGGT    | CCG  |      |      |      | 2632 |
| <i>Boleophthalmus pectinirostris</i> | GTACGGAGCAGAGCACATCAACCTCAAGGGCC  | ATCCCGGCTCACTTACT     | TGGGGAACATGTGGGCCGAG  | AGCTGGT  | CGG  |      |      |      | 2641 |
| <i>Cynoglossus semilaevis</i>        | GTACGGTGCCAAGTATGTCAACCTGAAGGGA   | CCGATTCCCTGCTCATCTGCT | TGGCAACATGTGGGCCGAG   | CATGGT   | CTG  |      |      |      | 2644 |
| <i>Danio rerio</i>                   | ATATGGACCAGAAGCGATCAACCTGAAGGGCC  | ATTCCCTGCTACATCTGCTT  | TGGAAACATGTGGGCTCAAA  | CATGGT   | CTG  |      |      |      | 2752 |
| <i>Esox lucius</i>                   | ATACGGCGGAAATACATTAACCTGAAGGGA    | CCAATCCCTGCCATCTTTT   | TAGGTAAACATGTGGGCCAG  | AGCTGGT  | CTG  |      |      |      | 2638 |
| <i>Fundulus heteroclitus</i>         | GTATGGCTCAGAGTACATCAACTTAAAGGGT   | CCCATTCCAGGCTCATTGTT  | TGGGCAACATGTGGGCCAG   | AGCTGGT  | CTG  |      |      |      | 2650 |
| <i>Gekko japonicus</i>               | CTACGGTGCTGAGCACATCAACCTCAAGGGCC  | AAATTCCAGGCTCATTGCT   | TAGGGAACATGTGGGCCAGT  | CTGGT    | CAA  |      |      |      | 2644 |
| <i>Haplochromis burtoni</i>          | GTATGGCTCCAACATATCAACCTAAAGGGCC   | ATTCCCTGCTCATTACTT    | TGGCAACATGTGGGCCAG    | AGCTGGT  | CTG  |      |      |      | 2641 |
| <i>Hippocampus comes</i>             | GTACGGCCCTAAACGCGTCAACCCGAGGGGG   | CCATACCTGCTCACTTGC    | TGGTAACATGTGGGCGCAG   | AGCTGGT  | CTG  |      |      |      | 2626 |
| <i>Ictalurus punctatus</i>           | ATACGGAAAGGAGCGCATCAACCTTAAAGGT   | CCCATCCCTGCACATTTACT  | TAGGAACATGTGGGCCAG    | AGCTGGT  | CAG  |      |      |      | 2641 |
| <i>Larimichthys crocea</i>           | CTATGGCCCAGAGCGCATTAACCTGAAGGGA   | CCAATTCCCTGCTCATTGCT  | TGGCAACATGTGGGCCAG    | AGCTGGT  | CTG  |      |      |      | 2635 |
| <i>Lates calcarifer</i>              | ATATGGTCCTGAGTACATCAACCTGAAGGGA   | CCCATCCCTGCTCATTGCT   | TGGGCAACATGTGGGCCAG   | AGCTGGT  | CTG  |      |      |      | 2638 |
| <i>Latimeria chalumnae</i>           | ATATGGTGACAAGTATATCAATCTTAAAGGT   | CCCATTCCCTGCTCATCTTT  | TAGGAACATGTGGGCCAGT   | CATGGT   | TGA  |      |      |      | 2626 |
| <i>Lepisosteus oculatus</i>          | GTACGGATCTGAATACGTCAACCTGAAGGGA   | CCCATCCCTGCCACCTGCT   | TGGTAACATGTGGGCCAGT   | CTGGT    | CTA  |      |      |      | 2626 |
| <i>Macaca fascicularis</i>           | CTACGGGGCCCAGCACATCAATCTGGAGGGG   | CCCATCCCTGCTCACCCTG   | TGGGGAACATGTGGGCCAA   | ACTTGGT  | CCA  |      |      |      | 2671 |
| <i>Manacus vitellinus</i>            | GTACGGGGCAGAGCACATAAACCTGAGGGGG   | CCCATCCCTGCTCATCTGCT  | TAGGCAACATGTGGGCTCAGT | CATGGT   | CCA  |      |      |      | 2623 |
| <i>Mus musculus</i>                  | CTATGGGTCCGAGTACATCAACCTGGATGGC   | CCCATTCCCTGCCATCTGCT  | TAGGGAACATGTGGGCGCAG  | AGCTGGT  | CCA  |      |      |      | 2683 |
| <i>Neolamprologus brichardi</i>      | GTATGGCTCCAACATATCAACCTAAAGGGCC   | ATTCCCTGCTCATTACTT    | TGGCAACATGTGGGCCAG    | AGCTGGT  | CTG  |      |      |      | 2641 |
| <i>Oncorhynchus mykiss</i>           | GTATGGAGGCAACACATCAACCTGAAGGGA    | CCCATCCCTGCACATCTTT   | TAGGCAACATGTGGGCGCAG  | AGCTGGT  | CTG  |      |      |      | 2638 |
| <i>Oreochromis niloticus</i>         | GTATGGCTCCAACCATCAACCTAAAGGGCC    | ATTCCCTGCTCATTACTT    | TGGCAACATGTGGGCCAG    | AGCTGGT  | CTG  |      |      |      | 2641 |
| <i>Poecilia formosa</i>              | GTATGGCTCAGATAACATCAACTTAAAGGGG   | CCCATCCCTGCTCACTTGT   | TGGGCAACATGTGGGCCAG   | AGCTGGT  | CTG  |      |      |      | 2647 |
| <i>Poecilia latipinna</i>            | GTATGGCTCAGATAACATCAACTTAAAGGGG   | CCCATCCCTGCTCACTTGT   | TGGGCAACATGTGGGCCAG   | AGCTGGT  | CTG  |      |      |      | 2647 |
| <i>Pseudopodoces humilis</i>         | ATATGGTGCAAGAGCACATAAACCTGAAGGGT  | CCCATCCCTGCCATCTGCT   | TAGGCAACATGTGGGCTCAGT | CATGGT   | CCA  |      |      |      | 2623 |
| <i>Pundamilia nyererei</i>           | GTATGGCTCCAACATATCAACCTAAAGGGCC   | ATTCCCTGCTCATTACTT    | TGGCAACATGTGGGCCAG    | AGCTGGT  | CTG  |      |      |      | 2641 |
| <i>Pygocentrus nattereri</i>         | GTATGGAGCAAAGCGATCAACCTCAAGGGG    | CCAATTCCAGCACATTTACT  | TAGGAACATGTGGTCCAG    | AGCTGGT  | CCA  |      |      |      | 2623 |
| <i>Python bivittatus</i>             | GTATGGAGAAACGCACATCAATCTCAAGGGT   | CCAATTCCAGGCTCATTGCT  | TAGGTAAACATGTGGGCCA   | ATCATGGG | CAA  |      |      |      | 2635 |
| <i>Rattus norvegicus</i>             | TTATGGGTCTGAGTACATCAACCTGGATGGT   | CCCATTCCCTGCTCACCTGCT | TAGGGAACATGTGGGCCAG   | AGCTTGGT | CCA  |      |      |      | 2686 |
| <i>Scleropages formosus</i>          | TTATGGACCTGACCGAATCAACCTGAGAGGT   | CCTATTCCAGCACATCTTT   | TGGTAACATGTGGGCCAGT   | CTTGGG   | CTG  |      |      |      | 2626 |
| <i>Sinocyclocheilus anshuiensis</i>  | GTATGGACCAGAACATCAACCTTAAAGGA     | CCAATTCCAGGCTCATCTGCT | TGGAAATATGTGGGCCCA    | AGCTGGT  | CTG  |      |      |      | 2623 |
| <i>Xenopus tropicalis</i>            | GTATGGAGATAAAGAATCAACCTAAAGGGG    | CCAATTCCCTGCTCATCTCT  | TGGTAACATGTGGGCCAG    | AGCTGGT  | CTA  |      |      |      | 2635 |
| <i>Lipotes vexillifer</i>            | CTACGGGTCCGAGCTCATCAACCTGGAGGGC   | CCCATCCAGGCCACCTGCT   | TGGGGAACATGTGGGCCAG   | AGCTGGT  | CCA  |      |      |      | 2692 |
| <i>Orcinus orca</i>                  | CTACGGGTCCGAGCTCATCAACCTGGAGGGC   | CCCATCCAGGCCACCTGCT   | TGGGGAACATGTGGGCCAG   | AGCTGGT  | CCA  |      |      |      | 2677 |
| <i>Homo sapiens</i>                  | CTACGGGGCCCAGCACATCAACCTGGAGGGC   | CCCATTCCCTGCTCACCTGCT | TGGGGAACATGTGGGCCAG   | AGCTGGT  | CCA  |      |      |      | 2668 |

| conservation                         | 2650                  | 2660              | 2670                | 2680                | 2690             | 2700   | 2710 | 2720 |  |
|--------------------------------------|-----------------------|-------------------|---------------------|---------------------|------------------|--------|------|------|--|
| <i>Callorhinchus milii</i>           | ATATCTATGATCTGTTAACA  | CCTTATCCTAAC      | GTCTCTCATGTTCGATGCT | ACTCAGCAATGATTGCTC  | AGGGTGGACT       | 2727   |      |      |  |
| <i>Alligator mississippiensis</i>    | CCATTTTTGATCTGCTGACAC | CCTTTCCTAGTGCCAC  | CAAAGTGGATGCC       | ACCCAGCCATGAAAAGCC  | AGAAC            | TGGACC | 2712 |      |  |
| <i>Anolis carolinensis</i>           | ACATTTTTGACCTTGTGGCA  | CCCTTCCCAAATGCTAT | CAAAGTGGATGCC       | ACACAGCAATGAAAAGCA  | AGGGCTGGACA      | 2784   |      |      |  |
| <i>Astyanax mexicanus</i>            | GCATCATGGACCTGGTTAGAC | CCCTACCCCAACGCCG  | CTCAGGTGGACGTCACA   | CAAGCCATGATAGCCA    | AGGGCTGGGAT      | 2712   |      |      |  |
| <i>Boleophthalmus pectinirostris</i> | GGATAATGGACCTGGTTATG  | CCCTACCCAGACGCCA  | CACAAGTTGACGCC      | ACTCGGCCATGGTGGCTC  | AGAAATGGGAT      | 2721   |      |      |  |
| <i>Cynoglossus semilaevis</i>        | GAATCATGGATCTGGTCATG  | CCCTACCCAGACGCCA  | CACAGGTTGATGCC      | ACACAGCAATGGTAGCCC  | AGGGGTGGAAT      | 2724   |      |      |  |
| <i>Danio rerio</i>                   | GTATCATGTAGTCTCGTCAAT | CCGTACCCGTATGCCA  | CACAAGTGGATGCC      | ACGCCAGCCATGATCGCA  | AAGGCTGGACC      | 2832   |      |      |  |
| <i>Esox lucius</i>                   | GCATCATGGACTTGGCCATT  | CCCTACCCCAATGCCA  | CACAGGTTGATGCC      | ACGCCGCCATGATAGCCA  | AGGGCTGGAAT      | 2718   |      |      |  |
| <i>Fundulus heteroclitus</i>         | GCATCATGGATTTAGTCATG  | CCCTATCCAGATGCCA  | CACAAGTGGATGCC      | ACACAGCTATGGTGGCGC  | AGGGCTGGAAT      | 2730   |      |      |  |
| <i>Gekko japonicus</i>               | ATATCTTTGGGCTTGTATG   | CCCTTTCCTGATGCCAT | CAAAGTGGATGCC       | ACGCCAGCTATGAAAAGTC | AGGGCTGGACC      | 2724   |      |      |  |
| <i>Haplochromis burtoni</i>          | GCATAATGGATTGGTCATA   | CCCTACCCAGACGCTA  | CACAGGTCGACGCC      | ACCCAGCCATGGTGCAGC  | AGGGATGGGAT      | 2721   |      |      |  |
| <i>Hippocampus comes</i>             | GCATCATGGACCTGGTCATG  | CCCTATCCGATGCCA   | CGAAGTCGATGCT       | ACGCCAGCGATGGTGGCAA | AGGGCTGGAAT      | 2706   |      |      |  |
| <i>Ictalurus punctatus</i>           | GAATCATGGACTTGGTGAAC  | CCGTACCCGTAAGGCCA | CTCAAGTGGACGTC      | ACACAAGCCATGATAGACA | AGGGCTGGGAC      | 2721   |      |      |  |
| <i>Larimichthys crocea</i>           | GCATAATGGATTGGTCATG   | CCCTACCCAGATGCCA  | CGCAGGTTGACGCC      | ACTCAGCTATGGTTGCAC  | AGGGCTGGAAC      | 2715   |      |      |  |
| <i>Lates calcarifer</i>              | GCATAATGGATCTTGTTCATG | CCCTACCCAGATGCCA  | CGCAGGTTGACGCC      | ACACCGGCCATGGTGGCAA | AGGGCTGGAAT      | 2718   |      |      |  |
| <i>Latimeria chalumnae</i>           | GTATTTACAGTCTCCTTGTG  | CCATACCCAGAAGCCA  | CCCAGGTGGATGCT      | ACACCTGCAATGATTGCTC | AGAAGTGGAAAT     | 2706   |      |      |  |
| <i>Lepisosteus oculatus</i>          | ATATATATGATCTAGTGACT  | CCCTTTCCGGATGCT   | GGGCAGTTGATGCC      | ACCCAGCAATGGTAGCCA  | AGGGCTGGGAT      | 2706   |      |      |  |
| <i>Macaca fascicularis</i>           | ACATCTATGACTTGGTGGTG  | CCCTTCCCTTCA      | GGCCCTCGATG         | GACCCACGGAGCCATGCT  | AAAGCAGGGCTGGACG | 2751   |      |      |  |
| <i>Manacus vitellinus</i>            | ATATTTTCGACCTGGTGATG  | CCCTTCCCGAATGCCA  | CAAGTGGATGCC        | ACCCAGCCATGAAAAGC   | AGGGCTGGACA      | 2703   |      |      |  |
| <i>Mus musculus</i>                  | ACATCTATGATTGGTGGCG   | CCCTTCCCTTCC      | GCCCCCAATATAGAT     | GCCACGGAAGCCATGAT   | AAAGCAGGGATGGACA | 2763   |      |      |  |
| <i>Neolamprologus brichardi</i>      | GCATAATGGATTGGTTCATA  | CCCTACCCAGACGCTA  | CACAGGTTGACGCC      | ACCCAGCCATGGTGCAGC  | AGGGATGGGAT      | 2721   |      |      |  |
| <i>Oncorhynchus mykiss</i>           | GCATCATGGACTTGGCCATT  | CCGTACCCCGATGCCA  | CTCAAGTAGACGCC      | ACACAGCCATGATAGCCA  | AGGGCTGGAAT      | 2718   |      |      |  |
| <i>Oreochromis niloticus</i>         | GCATAATGGATTGGTTCATG  | CCCTTACCCAGACGCCA | CACAGGTTGACGCC      | ACCCAGCCATGGTGCAGC  | AGGGATGGGAT      | 2721   |      |      |  |
| <i>Poecilia formosa</i>              | GAATCATGGATTTAGTCATG  | CCCTTACCCAGATGCCA | CACAAGTCGATGCC      | ACACCGGCTATGGTGGCGC | AGGGCTGGAAT      | 2727   |      |      |  |
| <i>Poecilia latipinna</i>            | GAATCATGGATTAGTCATG   | CCCTTACCCAGATGCCA | CACAAGTCGATGCC      | ACACCGGCTATGGTGGCAC | AGGGCTGGAAT      | 2727   |      |      |  |
| <i>Pseudopodoces humilis</i>         | ACATTTTCGACCTGGTGATA  | CCCTTCCCGAATGCCA  | CAAGTGGATGCC        | ACCCAGCCATGAAAAAC   | AGGGCTGGACA      | 2703   |      |      |  |
| <i>Pundamilia nyererei</i>           | GCATAATGGATTGGTTCATA  | CCCTACCCAGACGCTA  | CACAGGTCGACGCC      | ACCCAGCCATGGTGCAGC  | AGGGATGGGAT      | 2721   |      |      |  |
| <i>Pygocentrus nattereri</i>         | GCATCATGGACCTGGTTCATG | CCCTTACCCGACGCCA  | CTCAGTTGATGTC       | ACCAAGCCATGATAGCCA  | ATGGCTGGAAT      | 2703   |      |      |  |
| <i>Python bivittatus</i>             | ACATCTTTGACCTTGTTCATG | CCCTTCCCTTCA      | GCTACCAAGTGGATGCT   | ACACAGCCATGAAAAGTC  | AGGGCTGGACC      | 2715   |      |      |  |
| <i>Rattus norvegicus</i>             | ACATCTATGACTTGGTGGCA  | CCCTTCCCTTCC      | GCCCCCAGTATAGAT     | GCCACGGAGGCCATGAT   | AAAGCAGGGATGGACA | 2766   |      |      |  |
| <i>Scleropages formosus</i>          | CAATAATGGACTTGGCAGTC  | CCATATCCAGATGCTA  | CTCAAGTAGATGCT      | ACCCCTGCCATGATAGCTA | AGAAATGGGAT      | 2706   |      |      |  |
| <i>Sinocyclocheilus anshuiensis</i>  | CTATCATGGACCTTGTTCATT | CCGTACCCGTATGCCA  | CACAAGTGGATGCC      | ACGCCAGCCATGATTGCCA | AAGGTTGGGAC      | 2703   |      |      |  |
| <i>Xenopus tropicalis</i>            | ACATTTATGAGTTGTTGGTT  | CCATATCCCAATGCTG  | CACAAGTGGATGCT      | ACTCCAGCCATGATTGCTA | AGAAATGGACT      | 2715   |      |      |  |
| <i>Lipotes vexillifer</i>            | ACATCTATGACTTGGTAGTA  | CCCTTCCCTTCA      | GCCCCCAGGATGGAT     | GCCACAGAGGCCATGAT   | AAAGCAGGGCTGGACA | 2772   |      |      |  |
| <i>Orcinus orca</i>                  | ACATCTATGACTTGGTAGTA  | CCCTTCCCTTCA      | GCCCCCAGGATGGAT     | GCCACAGAGGCCATGAT   | AAAGCAGGGCTGGACA | 2757   |      |      |  |
| <i>Homo sapiens</i>                  | ACATCTATGACTTGGTGGTG  | CCCTTCCCTTCA      | GCCCCCCTCGATGGAC    | CCACAGAGGCTATGCT    | AAAGCAGGGCTGGACG | 2748   |      |      |  |



|                                      | 2730 | 2740 | 2750 | 2760 | 2770 | 2780 | 2790 | 2800 |      |
|--------------------------------------|------|------|------|------|------|------|------|------|------|
| conservation                         |      |      |      |      |      |      |      |      |      |
| <i>Callorhinchus milii</i>           | C    | C    | C    | A    | A    | A    | A    | A    | 2807 |
| <i>Alligator mississippiensis</i>    | C    | C    | C    | A    | A    | A    | A    | A    | 2792 |
| <i>Anolis carolinensis</i>           | C    | C    | C    | A    | A    | A    | A    | A    | 2864 |
| <i>Astyanax mexicanus</i>            | G    | C    | T    | A    | A    | T    | C    | G    | 2792 |
| <i>Boleophthalmus pectinirostris</i> | G    | C    | T    | C    | A    | T    | A    | G    | 2801 |
| <i>Cynoglossus semilaevis</i>        | G    | C    | T    | G    | T    | G    | A    | A    | 2804 |
| <i>Danio rerio</i>                   | C    | C    | C    | A    | A    | A    | A    | A    | 2912 |
| <i>Esox lucius</i>                   | G    | C    | C    | G    | T    | A    | A    | A    | 2798 |
| <i>Fundulus heteroclitus</i>         | G    | C    | C    | A    | A    | A    | A    | A    | 2810 |
| <i>Gekko japonicus</i>               | C    | C    | G    | A    | A    | A    | A    | A    | 2804 |
| <i>Haplochromis burtoni</i>          | G    | C    | C    | A    | T    | C    | A    | A    | 2801 |
| <i>Hippocampus comes</i>             | G    | C    | C    | A    | A    | A    | A    | A    | 2786 |
| <i>Ictalurus punctatus</i>           | G    | C    | T    | C    | T    | G    | A    | A    | 2801 |
| <i>Larimichthys crocea</i>           | C    | C    | C    | A    | T    | C    | A    | A    | 2795 |
| <i>Lates calcarifer</i>              | G    | C    | C    | A    | A    | A    | A    | A    | 2798 |
| <i>Latimeria chalumnae</i>           | G    | C    | G    | G    | A    | A    | A    | A    | 2786 |
| <i>Lepisosteus oculatus</i>          | G    | C    | A    | C    | G    | A    | A    | A    | 2786 |
| <i>Macaca fascicularis</i>           | C    | C    | C    | C    | G    | A    | A    | A    | 2831 |
| <i>Manacus vitellinus</i>            | G    | C    | C    | A    | A    | A    | A    | A    | 2783 |
| <i>Mus musculus</i>                  | C    | C    | C    | A    | A    | A    | A    | A    | 2843 |
| <i>Neolamprologus brichardi</i>      | G    | C    | C    | A    | T    | C    | A    | A    | 2801 |
| <i>Oncorhynchus mykiss</i>           | G    | C    | C    | A    | A    | A    | A    | A    | 2798 |
| <i>Oreochromis niloticus</i>         | G    | C    | C    | A    | T    | C    | A    | A    | 2801 |
| <i>Poecilia formosa</i>              | G    | C    | A    | C    | C    | A    | A    | A    | 2807 |
| <i>Poecilia latipinna</i>            | G    | C    | A    | C    | C    | A    | A    | A    | 2807 |
| <i>Pseudopodoces humilis</i>         | C    | C    | C    | A    | A    | A    | A    | A    | 2783 |
| <i>Pundamilia nyererei</i>           | G    | C    | C    | A    | T    | C    | A    | A    | 2801 |
| <i>Pygocentrus nattereri</i>         | G    | C    | C    | C    | G    | C    | A    | A    | 2783 |
| <i>Python bivittatus</i>             | C    | C    | A    | A    | A    | A    | A    | A    | 2795 |
| <i>Rattus norvegicus</i>             | C    | C    | C    | A    | A    | A    | A    | A    | 2846 |
| <i>Scleropages formosus</i>          | G    | C    | C    | A    | A    | A    | A    | A    | 2786 |
| <i>Sinocyclocheilus anshuiensis</i>  | C    | C    | C    | A    | A    | A    | A    | A    | 2783 |
| <i>Xenopus tropicalis</i>            | C    | C    | A    | A    | A    | A    | A    | A    | 2795 |
| <i>Lipotes vexillifer</i>            | C    | C    | C    | C    | A    | A    | A    | A    | 2852 |
| <i>Orcinus orca</i>                  | C    | C    | C    | C    | A    | A    | A    | A    | 2837 |
| <i>Homo sapiens</i>                  | C    | C    | C    | A    | A    | A    | A    | A    | 2828 |

|                                      | 2810 | 2820 | 2830 | 2840 | 2850 | 2860 | 2870 | 2880 |      |
|--------------------------------------|------|------|------|------|------|------|------|------|------|
| conservation                         |      |      |      |      |      |      |      |      |      |
| <i>Callorhinchus milii</i>           | G    | T    | C    | G    | A    | T    | G    | T    | 2884 |
| <i>Alligator mississippiensis</i>    | G    | T    | C    | C    | A    | T    | G    | T    | 2872 |
| <i>Anolis carolinensis</i>           | A    | T    | C    | C    | A    | T    | G    | T    | 2944 |
| <i>Astyanax mexicanus</i>            | G    | T    | C    | C    | A    | T    | G    | T    | 2872 |
| <i>Boleophthalmus pectinirostris</i> | G    | T    | C    | A    | A    | T    | G    | T    | 2878 |
| <i>Cynoglossus semilaevis</i>        | A    | T    | C    | C    | A    | T    | G    | T    | 2884 |
| <i>Danio rerio</i>                   | G    | T    | C    | C    | A    | T    | G    | T    | 2992 |
| <i>Esox lucius</i>                   | A    | T    | C    | C    | A    | T    | G    | T    | 2878 |
| <i>Fundulus heteroclitus</i>         | G    | T    | C    | C    | A    | T    | G    | T    | 2890 |
| <i>Gekko japonicus</i>               | G    | T    | C    | C    | A    | T    | G    | T    | 2884 |
| <i>Haplochromis burtoni</i>          | A    | T    | C    | C    | A    | T    | G    | T    | 2881 |
| <i>Hippocampus comes</i>             | A    | T    | C    | C    | A    | T    | G    | T    | 2866 |
| <i>Ictalurus punctatus</i>           | G    | T    | C    | C    | A    | T    | G    | T    | 2878 |
| <i>Larimichthys crocea</i>           | G    | T    | C    | C    | A    | T    | G    | T    | 2875 |
| <i>Lates calcarifer</i>              | G    | T    | C    | C    | A    | T    | G    | T    | 2878 |
| <i>Latimeria chalumnae</i>           | A    | T    | C    | C    | A    | T    | G    | T    | 2866 |
| <i>Lepisosteus oculatus</i>          | G    | T    | C    | C    | A    | T    | G    | T    | 2866 |
| <i>Macaca fascicularis</i>           | G    | T    | C    | C    | A    | T    | G    | T    | 2911 |
| <i>Manacus vitellinus</i>            | G    | T    | C    | C    | A    | T    | G    | T    | 2863 |
| <i>Mus musculus</i>                  | G    | T    | C    | C    | A    | T    | G    | T    | 2923 |
| <i>Neolamprologus brichardi</i>      | A    | T    | C    | C    | A    | T    | G    | T    | 2881 |
| <i>Oncorhynchus mykiss</i>           | G    | T    | C    | C    | A    | T    | G    | T    | 2878 |
| <i>Oreochromis niloticus</i>         | A    | T    | C    | C    | A    | T    | G    | T    | 2881 |
| <i>Poecilia formosa</i>              | A    | T    | C    | C    | A    | T    | G    | T    | 2887 |
| <i>Poecilia latipinna</i>            | A    | T    | C    | C    | A    | T    | G    | T    | 2887 |
| <i>Pseudopodoces humilis</i>         | G    | T    | C    | C    | A    | T    | G    | T    | 2863 |
| <i>Pundamilia nyererei</i>           | A    | T    | C    | C    | A    | T    | G    | T    | 2881 |
| <i>Pygocentrus nattereri</i>         | G    | T    | C    | C    | A    | T    | G    | T    | 2860 |
| <i>Python bivittatus</i>             | G    | T    | C    | C    | A    | T    | G    | T    | 2875 |
| <i>Rattus norvegicus</i>             | G    | T    | C    | C    | A    | T    | G    | T    | 2926 |
| <i>Scleropages formosus</i>          | A    | T    | C    | C    | A    | T    | G    | T    | 2866 |
| <i>Sinocyclocheilus anshuiensis</i>  | G    | T    | C    | C    | A    | T    | G    | T    | 2863 |
| <i>Xenopus tropicalis</i>            | A    | T    | C    | C    | A    | T    | G    | T    | 2872 |
| <i>Lipotes vexillifer</i>            | G    | T    | C    | C    | A    | T    | G    | T    | 2932 |
| <i>Orcinus orca</i>                  | G    | T    | C    | C    | A    | T    | G    | T    | 2917 |
| <i>Homo sapiens</i>                  | G    | T    | C    | C    | A    | T    | G    | T    | 2908 |

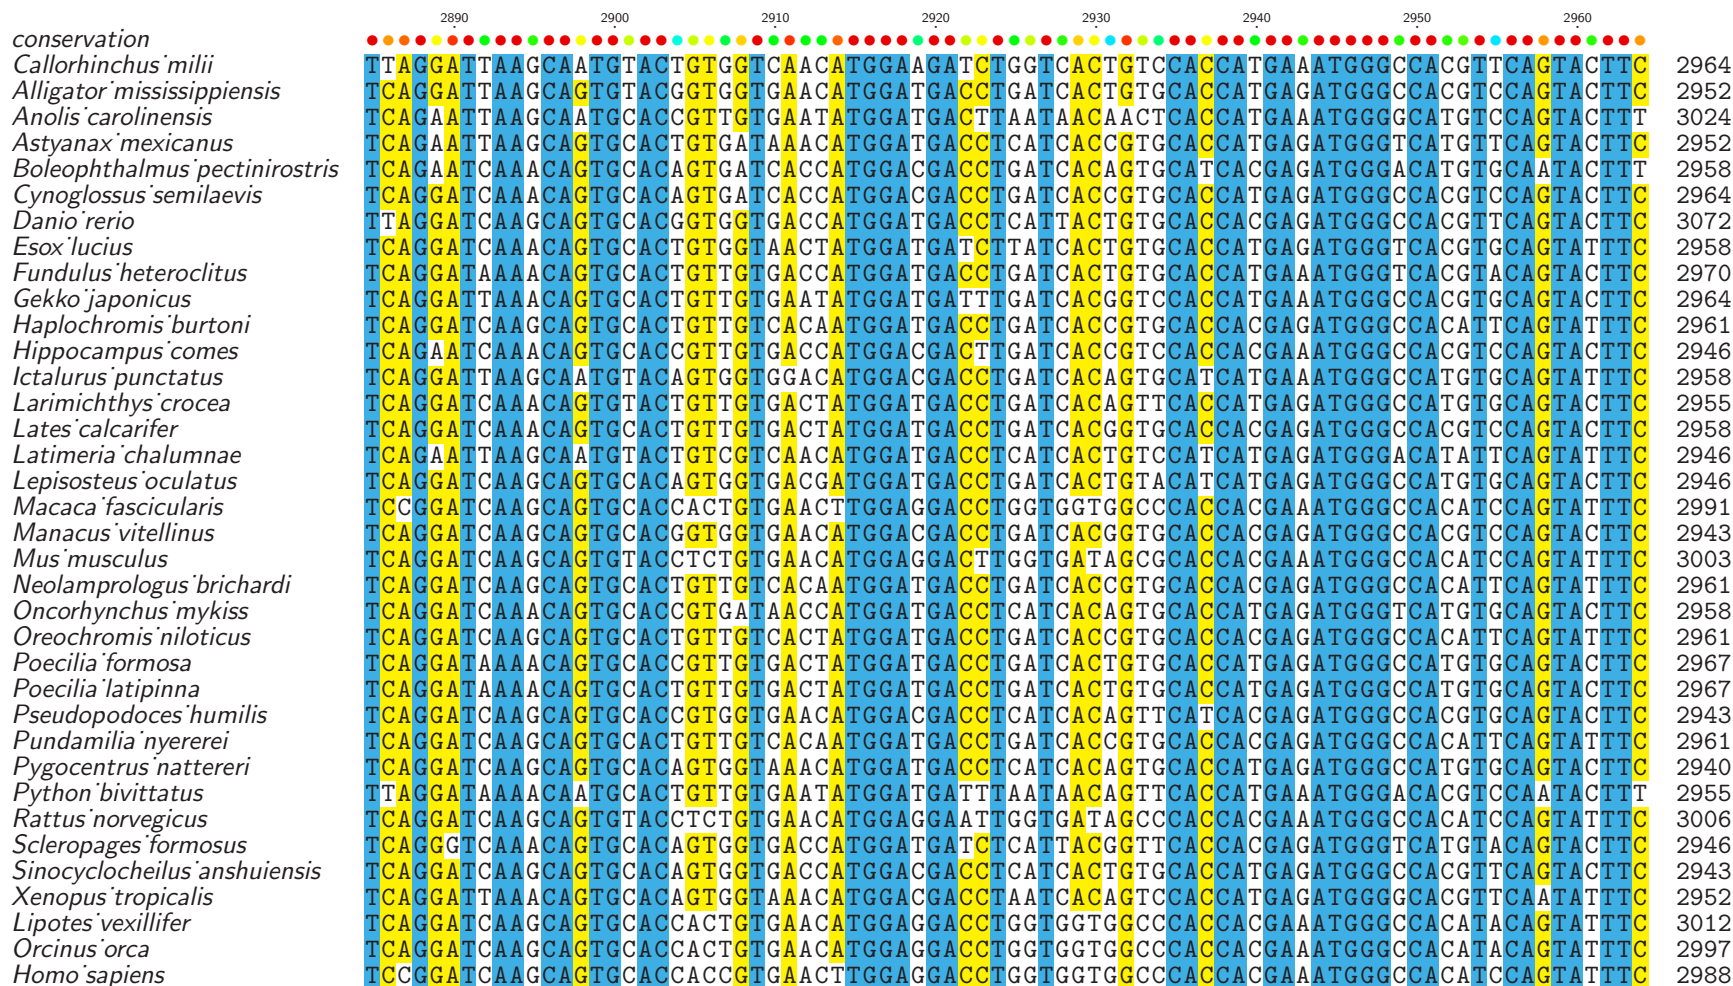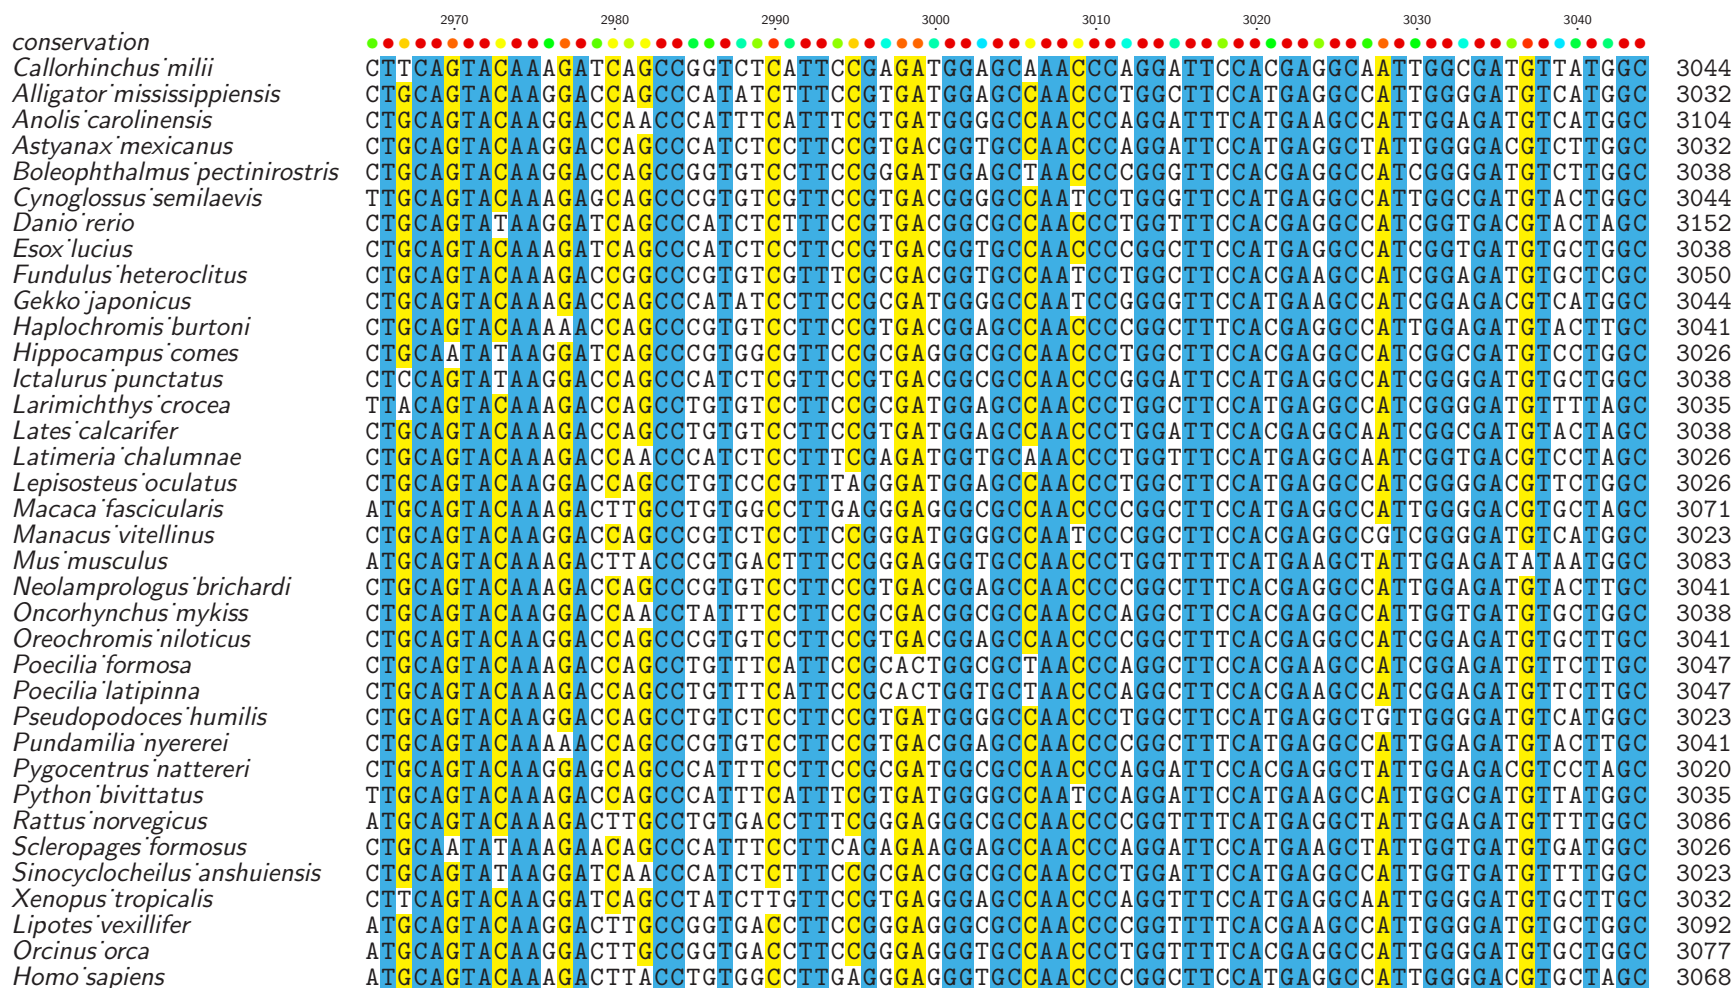



## conservation

|                                      |                                                                                     |      |
|--------------------------------------|-------------------------------------------------------------------------------------|------|
| <i>Callorhinchus milii</i>           | TCTTTCCGTTTCCACTCCAAAACATCTGCACACCATCGGCCTACTCAGTGAACTAGAGGACAATATCGAATGGATATCA     | 3124 |
| <i>Alligator mississippiensis</i>    | CCTGTCAGTCTCCACCCCTAAGCACCTGCACAGCATCAACCTTCTTCTCAGGTTGAGGATAATATGGAGAGCGACATCA     | 3112 |
| <i>Anolis carolinensis</i>           | CCTATCGGTGTCTACTCCAAAACACTTATTCAGCATCAAGCTGCTAGATCAGGTGGAAGACAATCCTGAGAGTGACATTA    | 3184 |
| <i>Astyanax mexicanus</i>            | CCTGTCAGTGTCCACTCCAAAACATCTCCACACCATCGGCCTGCTGGACAAACTGGAGGAAAACGCAGAAAGCACCATTA    | 3112 |
| <i>Boleophthalmus pectinirostris</i> | TCTGTCTGTGTCCACTCCCAAAACATCTACAGAGCATTTGGTCTGCTGGACAAAAGTGAAAAGCAACTCTGAGAGTGACATTA | 3118 |
| <i>Cynoglossus semilaevis</i>        | ACTGTCAGTGTCAACACCCAAAACATCTGCACAGCATTTGGTCTCTGGACAAAAGTGAGAGCAACCACGAGAGCGACATCA   | 3124 |
| <i>Danio rerio</i>                   | TCTGTCAGTAGCCACACCTAAACACTTTACAGAGCATCGGCCTGCTGGACAAGGTGGAGGACAATGCAGAGAGCACCATCA   | 3232 |
| <i>Esox lucius</i>                   | CCTGTCCGTTGCCACTCCCAGACATTTAAAGGAGATTGGTTTACTAGATGTGGTGAAGCCAACAAGGAGAGTACAATCA     | 3118 |
| <i>Fundulus heteroclitus</i>         | ACTGTCAGTCTCCACGCCCAAAACATCTCCAGAGCATCGGCCTCTGGACAAAAGTGAGAGTAACCACGAGAGTGACATAA    | 3130 |
| <i>Gekko japonicus</i>               | CTTGTCAGTGTCCACCCCCAAAACACTGTACAGCATCAGTCTCTGGATCGGGTGAAGACAACCTGGAGGGTGACATTA      | 3124 |
| <i>Haplochromis burtoni</i>          | CTTGTCGTGTGTGCACACCCAAAACATCTGCAGAGCATCGGCCTCTGGACAAGGTTGAGAACAACATGAGAGTGACATCA    | 3121 |
| <i>Hippocampus comes</i>             | TTTGTCGCTGTCCACACCCAAAGCACCTGAAGAGCATCGGCCTCTGGACAAAAGTGAAAAACAATCACGAGAGTGACATCA   | 3106 |
| <i>Ictalurus punctatus</i>           | GCTTTCAGTGTCCACACCCAAAACACTTTCACACCATCGGCCTGCTTGATAAGGTGAGGACAACCCGGAGAGCACCATAA    | 3118 |
| <i>Larimichthys crocea</i>           | CCTGTCTGTTTCTACGCCCAAAACATCTGCAGAGCATCGGCCTCTGGACAAAAGTGAAGACAACCATGAGAGTGATATCA    | 3115 |
| <i>Lates calcarifer</i>              | CCTTCTGTGTCTACACCCAAAACATCTGCAGAGCATTTGGCCTCTGGACAAAAGTTGAGAACAACCATGAGAGTGATATCA   | 3118 |
| <i>Latimeria chalumnae</i>           | ACTATCTGTCTCCACCCAAAACACTTTCACAGTATTGGGCTACTTGACACAGTCAATGAAAATTATGAGAGTGACATTA     | 3106 |
| <i>Lepisosteus oculatus</i>          | CCTGTCCGTTTCCACACCCAAAGCACCTGCACAGCATCGGACTGCTGGACAAAAGTGAGAACAACATATGACAGTGACATTA  | 3106 |
| <i>Macaca fascicularis</i>           | CCTCTCAGTGTCTACGCCCAAAGCACCTGCACAGTCTGAACCTGCTGAGCAGTGAGGTGGCAGCCATGAGCATGATATCA    | 3151 |
| <i>Manacus vitellinus</i>            | CTTGTCGCTCTCCACCCAAAACACTGCACAGCATCAATCTGCTGGATGAAGTCAAGGAAGACCAAGAGAGTGACATTA      | 3103 |
| <i>Mus musculus</i>                  | TCTCTCAGTGTCTACCCCCAAGCATCTATACAGTCTCAACCTGCTTAGCACTGAGGGCAGTGGCTACGAGTATGACATCA    | 3163 |
| <i>Neolamprologus brichardi</i>      | CTTGTCGTGTGTGCACACCCAAAACATCTGCAGAGCATCGGCCTCTGGACAAGGTTGAGAACAACATGAGAGTGACATCA    | 3121 |
| <i>Oncorhynchus mykiss</i>           | CCTGTCCGTCGCCACTCCCAGGCATCTAAAGGAGATTGGTTTACTGGATGTGTGTGAGGACAACCCAGAGAGTAGCATCA    | 3118 |
| <i>Oreochromis niloticus</i>         | CTTGTCGTGTGTCAACACCCAAAACACTGCAGAGCATCGGCCTCTGGACAAGGTTGAGAACAACATGAGAGTGACATCA     | 3121 |
| <i>Poecilia formosa</i>              | GCTGTCCGTCCTCCACGCCCAAAACATCTGCAGAGCATCGGCCTCTGGACAAAAGTGGAAGTAACCACGAGAGTGACATCA   | 3127 |
| <i>Poecilia latipinna</i>            | GCTGTCCGTCCTCCACGCCCAAAACATCTGCAGAGCATCGGCCTCTGGACAAAAGTGAGAGTAACCACGAGAGTGACATCA   | 3127 |
| <i>Pseudopodoces humilis</i>         | CTTGTCGTGTCTCCACCCAAAACACTGCATAGCATCAATCTGCTGGACCAAGTCATGGAAAATGAAGAAAGTGATATTA     | 3103 |
| <i>Pundamilia nyererei</i>           | CTTGTCGTGTGTGCACACCCAAAACACTGCAGAGCATCGGCCTCTGGACAAGGTTGAGAACAACATGAGAGTGACATCA     | 3121 |
| <i>Pygocentrus nattereri</i>         | CCTGTCCAGTGTCCACTCCTAAACACTCTCCACAGCATTTGGCTTGCTGGACAAGGTGAGGACAACCAAGAGAGCACCATTA  | 3100 |
| <i>Python bivittatus</i>             | CTTATCAGTATCAACCCAAAAGCACTTGTATAGCATCAAGCTGCTTGATCATATGGAAGACAACCTTGAGGGTGACATCA    | 3115 |
| <i>Rattus norvegicus</i>             | TCTGTCTGTGTCTACACCAAGGCATCTACACAGTCTCAACCTGCTCAGCAGTGAGGGCAGTGGCTACGAGCATGACATCA    | 3166 |
| <i>Scleropages formosus</i>          | TCTGTCTGTCTCCACACCAATGCATCTGCACAGCATTTGGTCTTCTGGACAATGCAGAATCCTCATATGAGAGTGACATTA   | 3106 |
| <i>Sinocyclocheilus anshuiensis</i>  | CCTGTCAGTGTCCACACCTAAAACATCTTAAGAGCATTTGGCCTGCTGGACAAGGTGAGGACAATAAAGAAAGCACCATTA   | 3103 |
| <i>Xenopus tropicalis</i>            | TCTTTCAGTCTCTACACCAAAAACACTTGCAAAAGCATTTGGCCTTTTGATAAGGTGAGGACAACCCAGAAAGTGATATTA   | 3112 |
| <i>Lipotes vexillifer</i>            | CCTCTCAGTGTCTACCCCCAAGCACCTGCACAAAGATCAACCTGCTGAGTAGTGGGACGGCAGCTATGAGGAGGACATCA    | 3172 |
| <i>Orcinus orca</i>                  | CCTCTCAGTGTCTACCCCCAAGCACCTGCACAAAGATCAACCTGCTGAGTAGTGGGACGGCAGCTATGAGGAGGACATCA    | 3157 |
| <i>Homo sapiens</i>                  | CCTCTCAGTGTCTACGCCCAAAGCACCTGCACAGTCTCAACCTGCTGAGCAGTGAGGGTGGCAGCGACGAGCATGACATCA   | 3148 |

## conservation

|                                      |                                                                                     |      |
|--------------------------------------|-------------------------------------------------------------------------------------|------|
| <i>Callorhinchus milii</i>           | ACTACCTGTTGAGCATTTGCTCTGGAAAAAATTGCTTTTATTCCATTTGGATATCTGATGGATAAGTGGCGATGGAAGGTT   | 3204 |
| <i>Alligator mississippiensis</i>    | ATTACCTGATGAGCATTTGCCCTTGACAAAGATTGCCCTTTGCTTTTGGCTACCTTATGGACCAGTGGAGGTGGAAGGTT    | 3192 |
| <i>Anolis carolinensis</i>           | ACTACTTGATGAGCATTTGCATTTGGATAAGATTGCTTTCCTGCCCTTTGGCTATCTGATGGACCAATGGAGATGGAAGGTT  | 3264 |
| <i>Astyanax mexicanus</i>            | ACTTCTGATGAGCATTTGCCCTTGACAAAATTGCATTCCTGCCGTTCCGGCTACCTAATGGACCAGTGGAGATGGAAGGTG   | 3192 |
| <i>Boleophthalmus pectinirostris</i> | ACTTCTGATGAGCATGGCCCTTGATAAGATTGCCCTTCCTGCCCTTTGGTTACCTTATGGACCAGTGGAGATGGAAGGTA    | 3198 |
| <i>Cynoglossus semilaevis</i>        | ACTTCTGATGAGCATGGCTCTGGACAAGATTGCATTCCTACCTTTCCGGTTCTGATGGACCAGTGGAGATGGAAGGTG      | 3204 |
| <i>Danio rerio</i>                   | ACTTTCTGATGAGCATTTGCATTTGGATAAGATTGCCCTTCTGCCATTTGGCTACCTGATGGACCAGTGGAGGTGGAAGGTG  | 3312 |
| <i>Esox lucius</i>                   | ATTACCTCATGAGTATTGCTCTGGACAAAATCGCCTTCCTGCCCTTTGGTTACCTGATGGACCAGTGGAGGTGGAAGGTT    | 3198 |
| <i>Fundulus heteroclitus</i>         | ACTTTTTAATGAGCATGGCGCTGGACAAAATTGCCCTTCCTGCCCTTTGGTTACCTGATGGATCAGTGGAGGTGGAAGGTC   | 3210 |
| <i>Gekko japonicus</i>               | ACTACTTGATGAGCATTTGCCTTGACAAAGATTGCCCTTCTGCCCTTTGGCTACCTCATGGACCAGTGGAGGTGGAAGGTT   | 3204 |
| <i>Haplochromis burtoni</i>          | ACTTCTGATGAGCATTTGCATTTGACAAGATTGCCCTTCCTACCTTTCCGGCTACCTGATGGACCAATGGAGGTGGAAGGTT  | 3201 |
| <i>Hippocampus comes</i>             | ACTTTCTGATGAACATGGCGCTGCATAAAATCGCCTTCCTGCCGTTTGGCTACCTGATGGACCAGTGGAGATGGAAGGTT    | 3186 |
| <i>Ictalurus punctatus</i>           | ACTTCTGATGAGCATCGCCCTGGATAAAAATCGCCTTCCTGCCCTTTGGCTACCTGATGGACCAATGGAGGTGGAAGGTT    | 3198 |
| <i>Larimichthys crocea</i>           | ACTTCTGATGAACATGGCGCTTGACAAGATTGCCCTTCCTTCCCTTTGGCTACCTGATGGATCAGTGGAGATGGAAGGTT    | 3195 |
| <i>Lates calcarifer</i>              | ACTTCTGATGAGCATGGCACTTGACAAGATCGCCTTCCTACCTTTTGGCTACCTGATGGACCAGTGGAGATGGAAGGTA     | 3198 |
| <i>Latimeria chalumnae</i>           | ACTATCTAATGAGTATTGCCCTGGATAAGATTGCATTCCTGCCCTTTGGGTATCTCATGGATCAGTGGCGATGGAAGGTT    | 3186 |
| <i>Lepisosteus oculatus</i>          | ACTATCTGATGAGCATTTGCCCTTGACAAAATTGCCCTTCCTGCCCTTTGGCTACCTGATGGACCAGTGGCGCTGGAAGGTT  | 3186 |
| <i>Macaca fascicularis</i>           | ACTTTCTGATGAAGATGGCGCTTGACAAGATTGCCCTTATCCCTTACCTTACCTATCTCGTTGATCAGTGGCGCTGGAGGTT  | 3231 |
| <i>Manacus vitellinus</i>            | ACTACCTGATGAGCATTTGCCCTTGACAAAATCGCCTTCCTGCCCTTTGGGTACCTCATGGACCAGTGGCGCTGGAAGGTT   | 3183 |
| <i>Mus musculus</i>                  | ACTTTCTAATGAAGATGGCCCTTGACAAGATCGCCTTTATCCCTTTCAGCTACCTCATCGACCAGTGGCGCTGGAGGTT     | 3243 |
| <i>Neolamprologus brichardi</i>      | ACTTCTGATGAGCATTTGCATTTGACAAGATTGCCCTTCCTACCTTTTGGCTACCTGATGGACCAATGGAGGTGGAAGGTT   | 3201 |
| <i>Oncorhynchus mykiss</i>           | ATTACCTCATGAGCATCGCCCTTGACAAAATTGCCCTTCCTGCCCTTTGGCTACTTGATGGACCAGTGGAGGTGGAAGGTT   | 3198 |
| <i>Oreochromis niloticus</i>         | ACTTCTGATGAGCATGGCACTTGACAAGATTGCCCTTCCTACCTTTTGGCTACCTAATGGACCAGTGGAGGTGGAAGGTT    | 3201 |
| <i>Poecilia formosa</i>              | ACTTTTTGATGAGCATGGCGCTTAGACAAAATTGCCCTTCCTGCCCTTTGGGTACCTGATGGACCAGTGGAGGTGGAAGGTT  | 3207 |
| <i>Poecilia latipinna</i>            | ACTTTTTGATGAGCATGGCGCTTAGACAAAATTGCCCTTCCTGCCCTTTTGGGTACCTGATGGACCAGTGGAGGTGGAAGGTT | 3207 |
| <i>Pseudopodoces humilis</i>         | ACTACCTGATGAGCATCGCCCTGGATAAAAATTGCCCTTCCTGCCCTTTGGGTACCTCATGGACCAGTGGCGGTGGAAGGTT  | 3183 |
| <i>Pundamilia nyererei</i>           | ACTTCTGATGAGCATTTGCATTTGACAAGATTGCCCTTCCTACCTTTTGGGTACCTGATGGACCAATGGAGGTGGAAGGTT   | 3201 |
| <i>Pygocentrus nattereri</i>         | ACTTCTAATGAGCATTTGCCCTTGACAAAATTGCCCTTCCTGCAATTTGGCTACCTGATGGACCAGTGGCGGTGGAAGGTT   | 3180 |
| <i>Python bivittatus</i>             | ACTACCTGATGAGCATTTGCCTTGATAAGATTGCCCTTCCTGCCCTTTGGGTACCTGATGGACCAATGGAGGTGGAAGGTT   | 3195 |
| <i>Rattus norvegicus</i>             | ACTTTCTAATGAAGATGGCCCTTGACAAGATCGCCTTTCATCCCTTTCAGCTACCTCATGACCAGTGGCGCTGGAGGTT     | 3246 |
| <i>Scleropages formosus</i>          | ATTACTTGATGAGCATTTGCTCTGGACAAAATCGCCTTCCTGCCCTTTGGGTACCTTGATGGACCAGTGGAGGTGGAAGGTT  | 3186 |
| <i>Sinocyclocheilus anshuiensis</i>  | ACTTCTGATGAGCATGGCCCTTGATAAGATTGCCCTTCCTGCCCTTTTGGGTACCTGATGGACCAGTGGAGGTGGAAGGTA   | 3183 |
| <i>Xenopus tropicalis</i>            | ATTATCTCATGAGTATTGCCTTGATAAAAATTGCCCTTCCTTCCATTTGGTTTCTCATGGATCAGTGGCGCTGGAAGGTT    | 3192 |
| <i>Lipotes vexillifer</i>            | ACTTTCTGATGAAGATGGCGCTTGACAAGATCGCCTTTGTTCCCTTTCAGCTATCTTGTTGGACCAGTGGCGCTGGAGGTT   | 3252 |
| <i>Orcinus orca</i>                  | ACTTTCTGATGAAGATGGCGCTTGACAAGATCGCCTTTGTTCCCTTTCAGCTATCTTGTTGGACCAGTGGCGCTGGAGGTT   | 3237 |
| <i>Homo sapiens</i>                  | ACTTTCTGATGAAGATGGCCCTTGACAAGATCGCCTTTATCCCTTTCAGCTACCTCGTGCATCAGTGGCGCTGGAGGTT     | 3228 |

|              | 3210                                                                                                                                                                                                                                                                                                                                                                                                                                                                                                                                                                                                                                                                                                                                                                                                                                                                                                                                                                                                                                                                                                                                                                                                                                                                                                                                                                                                                                                                                                                                                                                                                                                                                                                                                                                                                                                                                                                                                                                                                                                                                                                                                                                                                                                                                                                                                                                                                                                                                                                                                                                                                                                                                                                                                                                                                                                                                                                                                                                                                                                                                                                                                                                                                                                                                                                                                                                                                                                                                                                                                                                                                                                                                                                                                                                                                                                                                                                                                                                                                                                                                                                                                                                                                                                                                                                                                                                                                                                                                                                                                                                                                                                                                                                                                                                                                                                                                                                                                                                                                                                                                                                                                                                                                                                                                                                                                                                                                                                                                                                                                                                                                                                                                                                                                                                                                                                                                                                                                                                                                                                                                                                                                                                                                                                                                                                                                                                                                                                                                                                                                                                                                                                                                                                                                                                                                                                                                                                                                                                                                                                                                                                                                                                                                                                                                                                                                                                                                                                                                                                                                                                                                                                                                                                                                                                                                                                                                                                                                                                                                                                                                                                                                                                                                                                                                                                                                                                                                                                                                                                                                                                                                                                                                                                                                                                                                                                                                                                                                                                                                                                                                                                                                                                                                                                                                                                                                                                                                                                                                                                                                                                                                                                                                                                                                                                                                                                                                                                                                                                                                                                                                                                                                                                                                                                                                                                                                                                                                                                                                                                                                                                                                                                                                                                                                                                                                                                                                                                                                                                                                                                                                                                                                                                                                                                                                                                                                                                                                                                                                                                                                                                                                                                                                                                                                                                                                                                                                                                                                                                                                                                                                                                                                                                                                                                                                                                                                                                                                                                                                                                                                                                                                                                                                                                                                                                            | 3220 | 3230 | 3240 | 3250 | 3260 | 3270 | 3280 |  |
|--------------|-------------------------------------------------------------------------------------------------------------------------------------------------------------------------------------------------------------------------------------------------------------------------------------------------------------------------------------------------------------------------------------------------------------------------------------------------------------------------------------------------------------------------------------------------------------------------------------------------------------------------------------------------------------------------------------------------------------------------------------------------------------------------------------------------------------------------------------------------------------------------------------------------------------------------------------------------------------------------------------------------------------------------------------------------------------------------------------------------------------------------------------------------------------------------------------------------------------------------------------------------------------------------------------------------------------------------------------------------------------------------------------------------------------------------------------------------------------------------------------------------------------------------------------------------------------------------------------------------------------------------------------------------------------------------------------------------------------------------------------------------------------------------------------------------------------------------------------------------------------------------------------------------------------------------------------------------------------------------------------------------------------------------------------------------------------------------------------------------------------------------------------------------------------------------------------------------------------------------------------------------------------------------------------------------------------------------------------------------------------------------------------------------------------------------------------------------------------------------------------------------------------------------------------------------------------------------------------------------------------------------------------------------------------------------------------------------------------------------------------------------------------------------------------------------------------------------------------------------------------------------------------------------------------------------------------------------------------------------------------------------------------------------------------------------------------------------------------------------------------------------------------------------------------------------------------------------------------------------------------------------------------------------------------------------------------------------------------------------------------------------------------------------------------------------------------------------------------------------------------------------------------------------------------------------------------------------------------------------------------------------------------------------------------------------------------------------------------------------------------------------------------------------------------------------------------------------------------------------------------------------------------------------------------------------------------------------------------------------------------------------------------------------------------------------------------------------------------------------------------------------------------------------------------------------------------------------------------------------------------------------------------------------------------------------------------------------------------------------------------------------------------------------------------------------------------------------------------------------------------------------------------------------------------------------------------------------------------------------------------------------------------------------------------------------------------------------------------------------------------------------------------------------------------------------------------------------------------------------------------------------------------------------------------------------------------------------------------------------------------------------------------------------------------------------------------------------------------------------------------------------------------------------------------------------------------------------------------------------------------------------------------------------------------------------------------------------------------------------------------------------------------------------------------------------------------------------------------------------------------------------------------------------------------------------------------------------------------------------------------------------------------------------------------------------------------------------------------------------------------------------------------------------------------------------------------------------------------------------------------------------------------------------------------------------------------------------------------------------------------------------------------------------------------------------------------------------------------------------------------------------------------------------------------------------------------------------------------------------------------------------------------------------------------------------------------------------------------------------------------------------------------------------------------------------------------------------------------------------------------------------------------------------------------------------------------------------------------------------------------------------------------------------------------------------------------------------------------------------------------------------------------------------------------------------------------------------------------------------------------------------------------------------------------------------------------------------------------------------------------------------------------------------------------------------------------------------------------------------------------------------------------------------------------------------------------------------------------------------------------------------------------------------------------------------------------------------------------------------------------------------------------------------------------------------------------------------------------------------------------------------------------------------------------------------------------------------------------------------------------------------------------------------------------------------------------------------------------------------------------------------------------------------------------------------------------------------------------------------------------------------------------------------------------------------------------------------------------------------------------------------------------------------------------------------------------------------------------------------------------------------------------------------------------------------------------------------------------------------------------------------------------------------------------------------------------------------------------------------------------------------------------------------------------------------------------------------------------------------------------------------------------------------------------------------------------------------------------------------------------------------------------------------------------------------------------------------------------------------------------------------------------------------------------------------------------------------------------------------------------------------------------------------------------------------------------------------------------------------------------------------------------------------------------------------------------------------------------------------------------------------------------------------------------------------------------------------------------------------------------------------------------------------------------------------------------------------------------------------------------------------------------------------------------------------------------------------------------------------------------------------------------------------------------------------------------------------------------------------------------------------------------------------------------------------------------------------------------------------------------------------------------------------------------------------------------------------------------------------------------------------------------------------------------------------------------------------------------------------------------------------------------------------------------------------------------------------------------------------------------------------------------------------------------------------------------------------------------------------------------------------------------------------------------------------------------------------------------------------------------------------------------------------------------------------------------------------------------------------------------------------------------------------------------------------------------------------------------------------------------------------------------------------------------------------------------------------------------------------------------------------------------------------------------------------------------------------------------------------------------------------------------------------------------------------------------------------------------------------------------------------------------------------------------------------------------------------------------------------------------------------------------------------------------------------------------------------------------------------------------------------------------------------------------------------------------------------------------------------------------------------------------------------------------------------------------------------------------------------------------------------------------------------------------------------------------------------------------------------------------------------------------------------------------------------------------------------------------------------------------------------------------------------------------------------------------------------------------------------------------------------------------------------------------------------------------------------------------------------------------------------------------------------------------------------------------------------------------------------------------------------------------------------------------------------------------------------------------------------------------------------------------------------------------------------------------------------------------------------------------------------------------------------------------------------------------------------------------------------------------------------------------------------------------------------------------------------------------------------------------------------------------------------------------------------------------------------------------------------------------------------------------------------------------------------|------|------|------|------|------|------|------|--|
| conservation | ●●●●●●●●●●●●●●●●●●●●●●●●●●●●●●●●●●●●●●●●●●●●●●●●●●●●●●●●●●●●●●●●●●●●●●●●●●●●●●●●●●●●●●●●●●●●●●●●●●●●●●●●●●●●●●●●●●●●●●●●●●●●●●●●●●●●●●●●●●●●●●●●●●●●●●●●●●●●●●●●●●●●●●●●●●●●●●●●●●●●●●●●●●●●●●●●●●●●●●●●●●●●●●●●●●●●●●●●●●●●●●●●●●●●●●●●●●●●●●●●●●●●●●●●●●●●●●●●●●●●●●●●●●●●●●●●●●●●●●●●●●●●●●●●●●●●●●●●●●●●●●●●●●●●●●●●●●●●●●●●●●●●●●●●●●●●●●●●●●●●●●●●●●●●●●●●●●●●●●●●●●●●●●●●●●●●●●●●●●●●●●●●●●●●●●●●●●●●●●●●●●●●●●●●●●●●●●●●●●●●●●●●●●●●●●●●●●●●●●●●●●●●●●●●●●●●●●●●●●●●●●●●●●●●●●●●●●●●●●●●●●●●●●●●●●●●●●●●●●●●●●●●●●●●●●●●●●●●●●●●●●●●●●●●●●●●●●●●●●●●●●●●●●●●●●●●●●●●●●●●●●●●●●●●●●●●●●●●●●●●●●●●●●●●●●●●●●●●●●●●●●●●●●●●●●●●●●●●●●●●●●●●●●●●●●●●●●●●●●●●●●●●●●●●●●●●●●●●●●●●●●●●●●●●●●●●●●●●●●●●●●●●●●●●●●●●●●●●●●●●●●●●●●●●●●●●●●●●●●●●●●●●●●●●●●●●●●●●●●●●●●●●●●●●●●●●●●●●●●●●●●●●●●●●●●●●●●●●●●●●●●●●●●●●●●●●●●●●●●●●●●●●●●●●●●●●●●●●●●●●●●●●●●●●●●●●●●●●●●●●●●●●●●●●●●●●●●●●●●●●●●●●●●●●●●●●●●●●●●●●●●●●●●●●●●●●●●●●●●●●●●●●●●●●●●●●●●●●●●●●●●●●●●●●●●●●●●●●●●●●●●●●●●●●●●●●●●●●●●●●●●●●●●●●●●●●●●●●●●●●●●●●●●●●●●●●●●●●●●●●●●●●●●●●●●●●●●●●●●●●●●●●●●●●●●●●●●●●●●●●●●●●●●●●●●●●●●●●●●●●●●●●●●●●●●●●●●●●●●●●●●●●●●●●●●●●●●●●●●●●●●●●●●●●●●●●●●●●●●●●●●●●●●●●●●●●●●●●●●●●●●●●●●●●●●●●●●●●●●●●●●●●●●●●●●●●●●●●●●●●●●●●●●●●●●●●●●●●●●●●●●●●●●●●●●●●●●●●●●●●●●●●●●●●●●●●●●●●●●●●●●●●●●●●●●●●●●●●●●●●●●●●●●●●●●●●●●●●●●●●●●●●●●●●●●●●●●●●●●●●●●●●●●●●●●●●●●●●●●●●●●●●●●●●●●●●●●●●●●●●●●●●●●●●●●●●●●●●●●●●●●●●●●●●●●●●●●●●●●●●●●●●●●●●●●●●●●●●●●●●●●●●●●●●●●●●●●●●●●●●●●●●●●●●●●●●●●●●●●●●●●●●●●●●●●●●●●●●●●●●●●●●●●●●●●●●●●●●●●●●●●●●●●●●●●●●●●●●●●●●●●●●●●●●●●●●●●●●●●●●●●●●●●●●●●●●●●●●●●●●●●●●●●●●●●●●●●●●●●●●●●●●●●●●●●●●●●●●●●●●●●●●●●●●●●●●●●●●●●●●●●●●●●●●●●●●●●●●●●●●●●●●●●●●●●●●●●●●●●●●●●●●●●●●●●●●●●●●●●●●●●●●●●●●●●●●●●●●●●●●●●●●●●●●●●●●●●●●●●●●●●●●●●●●●●●●●●●●●●●●●●●●●●●●●●●●●●●●●●●●●●●●●●●●●●●●●●●●●●●●●●●●●●●●●●●●●●●●●●●●●●●●●●●●●●●●●●●●●●●●●●●●●●●●●●●●●●●●●●●●●●●●●●●●●●●●●●●●●●●●●●●●●●●●●●●●●●●●●●●●●●●●●●●●●●●●●●●●●●●●●●●●●●●●●●●●●●●●●●●●●●●●●●●●●●●●●●●●●●●●●●●●●●●●●●●●●●●●●●●●●●●●●●●●●●●●●●●●●●●●●●●●●●●●●●●●●●●●●●●●●●●●●●●●●●●●●●●●●●●●●●●●●●●●●●●●●●●●●●●●●●●●●●●●●●●●●●●●●●●●●●●●●●●●●●●●●●●●●●●●●●●●●●●●●●●●●●●●●●●●●●●●●●●●●●●●●●●●●●●●●●●●●●●●●●●●●●●●●●●●●●●●●●●●●●●●●●●●●●●●●●●●●●●●●●●●●●●●●●●●●●●●●●●●●●●●●●●●●●●●●●●●●●●●●●●●●●●●●●●●●●●●●●●●●●●●●●●●●●●●●●●●●●●●●●●●●●●●●●●●●●●●●●●●●●●●●●●●●●●●●●●●●●●●●●●●●●●●●●●●●●●●●●●●●●●●●●●●●●●●●●●●●●●●●●●●●●●●●●●●●●●●●●●●●●●●●●●●●●●●●●●●●●●●●●●●●●●●●●●●●●●●●●●●●●●●●●●●●●●●●●●●●●●●●●●●●●●●●●●●●●●●●●●●●●●●●●●●●●●●●●●●●●●●●●●●●●●●●●●●●●●●●●●●●●●●●●●●●●●●●●●●●●●●●●●●●●●●●●●●●●●●●●●●●●●●●●●●●●●●●●●●●●●●●●●●●●●●●●●●●●●●●●●●●●●●●●●●●●●●●●●●●●●●●●●●●●●●●●●●●●●●●●●●●●●●●●●●●●●●●●●●●●●●●●●●●●●●●●●●●●●●●●●●●●●●●●●●●●●●●●●●●●●●●●●●●●●●●●●●●●●●●●●●●●●●●●●●●●●●●●●●●●●●●●●●●●●●●●●●●●●●●●●●●●●●●●●●●●●●●●●●●●●●●●●●●●●●●●●●●●●●●●●●●●●●●●●●●●●●●●●●●●●●●●●●●●●●●●●●●●●●●●●●●●●●●●●●●●●●●●●●●●●●●●●●●●●●●●●●●●●●●●●●●●●●●●●●●●●●●●●●●●●●●●●●●●●●●●●●●●●●●●●●●●●●●●●●●●●●●●●●●●●●●●●●●●●●●●●●●●●●●●●●●●●●●●●●●●●●●●●●●●●●●●●●●●●●●●●●●●●●●●●●●●●●●●●●●●●●●●●●●●●●●●●●●●●●●●●●●●●●●●●●●●●●●●●●●●●●●●●●●●●●●●●●●●●●●●●●●●●●●●●●●●●●●●●●●●●●●●●●●●●●●●●●●●●●●●●●●●●●●●●●●●●●●●●●●●●●●●●●●●●●●●●●●●●●●●●●●●●●●●●●●●●●●●●●●●●●●●●●●●●●●●●●●●●●●●●●●●●●●●●●●●●●●●●●●●●●●●●●●●●●●●●●●●●●●●●●●●●●●●●●●●●●●●●●●●●●●●●●●●●●●●●●●●●●●●●●●●●●●●●●●●●●●●●●●●●●●●●●●●●●●●●●●●●●●●●●●●●●●●●●●●●●●●●●●●●●●●●●●●●●●●●●●●●●●●●●●●●●●●●●●●●●●●●●●●●●●●●●●●●●●●●●●●●●●●●●●●●●●●●●●●●●●●●●●●●●●●●●●●●●●●●●●●●●●●●●●●●●●●●●●●●●●●●●●●●●●●●●●●●●●●●●●●●●●●●●●●●●●●●●●●●●●●●●●●●●●●●●●●●●●●●●●●●●●●●●●●●●●●●●●●●●●●●●●●●●●●●●●●●●●●●●●●●●●●●●●●●●●●●●●●●●●●●●●●●●●●●●●●●●●●●●●●●●●●●●●●●●●●●●●●●●●●●●●●●●●●●●●●●●●●●●●●●●●●●●●●●●●●●●●●●●●●●●●●●●●●●●●●●●●●●●●●●●●●●●●●●●●●●●●●●●●●●●●●●●●●●●●●●●●●●●●●●●●●●●●●●●●●●●●●●●●●●●●●●●●●●●●●●●●●●●●●●●●●●●●●●●●●●●●●●●●●●●●●●●●●●●●●●●●●●●●●●●●●●●●●●●●●●●●●●●●●●●●●●●●●●●●●●●●●●●●●●●●●●●●●●●●●●●●●●●●●●●●●●●●●●●●●●●●●●●●●●●●●●●●●●●●●●●●●●●●●●●●●●●●●●●●●●●●●●●●●●●●●●●●●●●●●●●●●●●●●●●●●●●●●●●●●●●●●●●●●●●●●●●●●●●●●●●●●●●●●●●●●●●●●●●●●●●●●●●●●●●●●●●●●●●●●●●●●●●●●●●●●●●●●●●●●●●●●●●●●●●●●●●●●●●●●●●●●●●●●●●●●●●●●●●●●●●●●●●●●●●●●●●●●●●●●●●●●●●●●●●●●●●●●●●●●●●●●●●●●●●●●●●●●●●●●●●●●●●●●●●●●●●●●●●●●●●●●●●●●●●●●●●●●●●●●●●●●●●●●●●●●●●●●●●●●●●●●●●●●●●●●●●●●●●●●●●●●●●●●●●●●●●●●●●●●●●●●●●●●●●●●●●●●●●●●●●●●●●●●●●●●●●●●●●●●●●●●●●●●●●●●●●●●●●●●●●●●●●●●●●●●●●●●●●●●●●●●●●●●●●●●●●●●●●●●●●●●●●●●●●●●●●●●●●●●●●●●●●●●●●●●●●●●●●●●●●●●●●●●●●●●●●●●●●●●●●●●●●●●●●●●●●●●●●●●●●●●●●●●●●●●●●●●●●●●●●●●●●●●●●●●●●●●●●●●●●●●●●●●●●●●●●●●●●●●●●●●●●●●●●●●●●●●●●●●●●●●●●●●●●●●●●●●●●●●●●●●●●●●●●●●●●●●●●●●●●●●●●●●●●●●●●●●●●●●●●●●●●●●●●●●●●●●●●●●●●●●●●●●●●●●●●●●●●●●●●●●●●●●●●●●●●●●●●●●●●●●●●●●●●●●●●●●●●●●●●●●●●●●●●●●●●●●●●●●●●●●●●●●●●●●●●●●●●●●●●●●●●●●●●●●●●●●●●●●●●●●●●●●●●●●●●●●●●●●●●●●●●●●●●●●●●●●●●●●●●●●●●●●●●●●●●●●●●●●●●●●●●●●●●●●●●●●●●●●●●●●●●●●●●●●●●●●●●●●●●●●●●●●●●●●●●●●●●●●●●●●●●●●●●●●●●●●●●●●●●●●●●●●●●●●●●●●●●●●●●●●●●●●●●●●●●●●●●●●●●●●●●●●●●●●●●●●●●●●●●●●●●●●●●●●●●●●●●●●●●●●●●●●●●●●●●●●●●●●●●●●●●●●●●●●●●●●●●●●●●●●●●●●●●●●●●●●●●●●●●●●●●●●●●●●●●●●●●●●●●●●●●●●●●●●●●●●●●●●●●●●●●●●●●●●●●●●●●●●●●●●●●●●●●●●●●●●●●●●●●●●●●●●●●●●●●●●●●●●●●●●●●●●●●●●●●●●●●●●●●●●●●●●●●●●●●●●●●●●●●●●●●●●●●●●●●●●●●●●●●●●●●●●●●●●●●●●●●●●●●●●●●●●●●●●●●●●●●●●●●●●●●●●●●●●●●●●●●●●●●●●●●●●●●●●●●●●●●●●●●●●●●●●●●●●●●●●●●●●●●●●●●●●●●●●●●●●●●●●●●●●●●●●●●●●●●●●●●●●●●●●●●●●●●●●●●●●●●●●●●●●●●●●●●●●●●●●●●●●●●●●●●●●●●●●●●●●●●●●●●●●●●●●●●●●●●●●●●●●●●●●●●●●●●●●●●●●●●●●●●●●●●●●●●●●●●●●●●●●●●●●●●●●●●●●●●●●●●●●●●●●●●●●●●●●●●●●●●●●●●●●●●●●●●●●●●●●●●●●●●●●●●●●●●●●●●●●●●●●●●●●●●●●●●●●●●●●●●●●●●●●●●●●●●●●●●●●●●●●●●●●●●●●●●●●●●●●●●●●●●●●●●●●●●●●●●●●●●●●●●●●●●●●●●●●●●●●●●●●●●●●●●●●●●●●●●●●●●●●●●●●●●●●●●●●●●●●●●●●●●●●●●●●●●●●●●●●●●●●●●●●●●●●●●●●●●●●●●●●●●●●●●●●●●●●●●●●●●●●●●●●●●●●●●●●●●●●●●●●●●●●●●●●●●●●●●●●●●●●●●●●●●●●●●●●●●●●●●●●●●●●●●●●●●●●●●●●●●●●●●●●●●●●●●●●●●●●●●●●●●●●●●●●●●●●●●●●●●●●●●●●●●●●●●●●●●●●●●●●●●●●●●●●●●●●●●●●●●●●●●●●●●●●●●●●●●●●●●●●●●●●●●●●●●●●●●●●●●●●●●●●●●●●●●●●●●●●●●●●●●●●●●●●●●●●●●●●●●●●●●●●●●●●●●●●●●●●●●●●●●●●●●●●●●●●●●●●●●●●●●●●●●●●●●●●●●●●●●●●●●●●●●●●●●●●●●●●●●●●●●●●●●●●●●●●●●●●●●●●●●●●●●●●●●●●●●●●●●●●●●●●●●●●●●●●●●●●●●●●●●●●●●●●●●●●●●●●●●●●●●●●●●●●●●●●●●●●●●●●●●●●●●●●●●●●●●●●●●●●●●●●●●●●●●●●●●●●●●●●●●●●●●●●●●●●●●●●●●●●●●●●●●●●●●●●●●●●●●●●●●●●●●●●●●●●●●●●●●●●●●●●●●●●●●●●●●●●●●●●●●●●●●●●●●●●●●●●●●●●●●●●●●●●●●●●●●●●●●●●●●●●●●●●●●●●●●●●●●●●●●●●●●●●●●●●●●●●●●●●●●●●●●●●●●●●●●●●●●●●●●●●●●●●●●●●●●●●●●●●●●●●●●●●●●●●●●●●●●●●●●●●●●●●●●●●●●●●●●●●●●●●●●●●●●●●●●●●●●●●●●●●●●●●●●●●●●●●●●●●●●●●●●●●●●●●●●●●●●●●●●●●●●●●●●●●●●●●●●●●●●●●●●●●●●●●●●●●●●●●●●●●●●●●●●●●●●●●●●●●●●●●●●●●●●●●●●●●●●●●●●●●●●●●●●●●●●●●●●●●●●●●●●●●●●●●●●●●●●●●●●●●●●●●●●●●●●●●●●●●●●●●●●●●●●●●●●●●●●●●●●●●●●●●●●●●●●●●●●●●●●●●●●●●●●●●●●●●●●●●●●●●●●●●●●●●●●●●●●●●●●●●●●●●●●●●●●●●●●●●●●●●●●●●●●●●●●●●●●●●●●●●●●●●●●●●●●●●●●●●●●●●●●●●●●●●●●●●●●●●●●●●●●●●●●●●●●●●●●●●●●●●●●●●●●●●●●●●●●●●●●●●●●●●●●●●●●●●●●●●●●●●●●●●●●●●●●●●●●●●●●●●●●●●●●●●●●●●●●●●●●●●●●●●●●●●●●●●●●●●●●●●●●●●●●●●●●●●●●●●●●●●●●●●●●●●●●●●●●●●●●●●●●●●●●●●●●●●●●●●●●●●●●●●●●●●●●●●●●●●●●●●●●●●●●●●●●●●●●●●●●●●●●●●●●●●●●●●●●●●●●●●●●●●●●●●●●●●●●●●●●●●●●●●●●●●●●●●●●●●●●●●●●●●●●●●●●●●●●●●●●●●●●●●●●●●●●●●●●●●●●●●●●●●●●●●●●●●●●●●●●●●●●●●●●●●●●●●●●●●●●●●●●●●●●●●●●●●●●●●●●●●●●●●●●●●●●●●●●●●●●●●●●●●●●●●●●●●●●●●●●●●●●●●●●●●●●●●●●●●●●●●●●●●●●●●●●●●●●●●●●●●●●●●●●●●●●●●●●●●●●●●●●●●●●●●●●●●●●●●●●●●●●●●●●●●●●●●●●●●●●●●●●●●●●●●●●●●●●●●●●●●●●●●●●●●●●●●●●●●●●●●●●●●●●●●●●●●●●●●●●●●●●●●●●●●●●●●●●●●●●●●●●●●●●●●●●●●●●●●●●●●●●●●●●●●●●●●●●●●●●●●●●●●●●●●●●●●●●●●●●●●●●●●●●●●●●●●●●●●●●●●●●●●●●●●●●●●●●●●●●●●●●●●●●●●●●●●●●●●●●●●●●●●●●●●●●●●●●●●●●●●●●●●●●●●●●●●●●●●●●●●●●●●●●●●●●●●●●●●●●●●●●●●●●●●●●●●●●●●●●●●●●●●●●●●●●●●●●●●●●●●●●●●●●●●●●●●●●●●●●●●●●●●●●●●●●●●●●●●●●●●●●●●●●●●●●●●●●●●●●●●●●●●●●●●●●●●●●●●●●●●●●●●●●●●●●●●●●●●●●●●●●●●●●●●●●●●●●●●●●●●●●●●●●●●●●●●●●●●●●●●●●●●●●●●●●●●●●●●●●●●●●●●●●●●●●●●●●●●●●●●●●●●●●●●●●●●●●●●●●●●●●●●●●●●●●●●●●●●●●●●●●●●●●●●●●●●●●●●●●●●●●●●●●●●●●●●●●●●●●●●●●●●●●●●●●●●●●●●●●●●●●●●●●●●●●●●●●●●●●●●●●●●●●●●●●●●●●●●●●●●●●●●●●●●●●●●●●●●●●●●●●●●●●●●●●●●●●●●●●●●●●●●●●●●●●●●●●●●●●●●●●●●●●●●●●●●●●●●●●●●●●●●●●●●●●●●●●●●●●●●●●●●●●●●●●●●●●●●●●●●●●●●●●●●●●●●●●●●●●●●●●●●●●●●●●●●●●●●●●●●●●●●●●●●●●●●●●●●●●●●●●●●●●●●●●●●●●●●●●●●●●●●●●●●●●●●●●●●●●●●●●●●●●●●●●●●●●●●●●●●●●●●●●●●●●●●●●●●●●●●●●●●●●●●●●●●●●●●●●●●●●●●●●●●●●●●●●●●●●●●●●●●●●●●●●●●●●●●●●●●●●●●●●●●●●●●●●●●●●●●●●●●●●●●●●●●●●●●●●●●●●●●●●●●●●●●●●●●●●●●●●●●●●●●●●●●●●●●●●●●●●●●●●●●●●●●●●●●●●●●●●●●●●●●●●●●●●●●●●●●●●●●●●●●●●●●●●●●●●●●●●●●●●●●●●●●●●●●●●●●●●●●●●●●●●●●●●●●●●●●●●●●●●●●●●●●●●●●●●●●●●●●●●●●●●●●●●●●●●●●●●●●●●●●●●●●●●●●●●●●●●●●●●●●●●●●●●●●●●●●●●●●●●●●●●●●●●●●●●●●●●●●●●●●●●●●●●●●●●●●●●●●●●●●●●●●●●●●●●●●●●●●●●●●●●●●●●●●●●●●●●●●●●●●●●●●●●●●●●●●●●●●●●●●●●●●●●●●●●●●●●●●●●●●●●●●●●●●●●●●●●●●●●●●●●●●●●●●●●●●●●●●●●●●●●●●●●●●●●●●●●●●●●●●●●●●●●●●●●●●●●●●●●●●●●●●●●●●●●●●●●●●●●●●●●●●●●●●●●●●●●●●●●●●●●●●●●●●●●●●●●●●●●●●●●●●●●●●●●●●●●●●●●●●●●●●●●●●●●●●●●●●●●●●●●●●●●●●●●●●●●●●●●●●●●●●●●●●●●●●●●●●●●●●●●●●●●●●●●●●●●●●●●●●●●●●●●●●●●●●●●●●●●●●●●●●●●●●●●●●●●●●●●●●●●●●●●●●●●●●●●●●●●●●●●●●●●●●●●●●●●●●●●●●●●●●●●●●●●●●●●●●●●●●●●●●●●●●●●●●●●●●●●●●●●●●●●●●●●●●●●●●●●●●●●●●●●●●●●●●●●●●●●●●●●●●●●●●●●●●●●●●●●●●●●●●●●●●●●●●●●●●●●●●●●●●●●●●●●●●●●●●●●●●●●●●●●●●●●●●●●●●●●●●●●●●●●●●●●●●●●●●●●●●●●●●●●●●●●●●●●●●●●●●●●●●●●●●●●●●●●●●●●●●●●●●●●●●●●●●●●●●●●●●●●●●●●●●●●●●●●●●●●●●●●●●●●●●●●●●●●●●●●●●●●●●●●●●●●●●●●●●●●●●●●●●●●●●●●●●●●●●●●●●●●●●●●●●●●●●●●●●●●●●●●●●●●●●●●●●●●●●●●●●●●●●●●●●●●●●●●●●●●●●●●●●●●●●●●●●●●●●●●●●●●●●●●●●●●●●●●●●●●●●●●●●●●●●●●●●●●●●●●●●●●●●●●●●●●●●●●●●●●●●●●●●●●●●●●●●●●●●●●●●●●●●●●●●●●●●●●●●●●●●●●●●●●●●●●●●●●●●●●●●●●●●●●●●●●●●●●●●●●●●●●●●●●●●●●●●●●●●●●●●●●●●●●●●●●●●●●●●●●●●●●●●●●●●●●●●●●●●●●●●●●●●●●●●●●●●●●●●●●●●●●●●●●●●●●●●●●●●●●●●●●●●●●●●●●●●●●●●●●●●●●●●●●●●●●●●●●●●●●●●●●●●●●●●●●●●●●●●●●●●●●●●●●●●●●●●●●●●●●●●●●●●●●●●●●●●●●●●●●●●●●●●●●●●●●●●●●●●●●●●●●●●●●●●●●●●●●●●●●●●●●●●●●●●●●●●●●●●●●●●●●●●●●●●●●●●●●●●●●●●●●●●●●●●●●●●●●●●●●●●●●●●●●●●●●●●●●●●●●●●●●●●●●●●●●●●●●●●●●●●●●●●●●●●●●●●●●●●●●●●●●●●●●●●●●●●●●●●●●●●●●●●●●●●●●●●●●●●●●●●●●●●●●●●●●●●●●●●●●●●●●●●●●●●●●●●●●●●●●●●●●●●●●●●●●●●●●●●●●●●●●●●●●●●●●●●●●●●●●●●●●●●●●●●●●●●●●●●●●●●●●●●●●●●●●●●●●●●●●●●●●●●●●●●●●●●●●●●●●●●●●●●●●●●●●●●●●●●●●●●●●●●●●●●●●●●●●●●●●●●●●●●●●●●●●●●●●●●●●●●●●●●●●●●●●●●●●●●●●●●●●●●●●●●●●●●●●●●●●●●●●●●●●●●●●●●●●●●●●●●●●●●●●●●●●●●●●●●●●●●●●●●●●●●●●●●●●●●●●●●●●●●●●●●●●●●●●●●●●●●●●●●●●●●●●●●●●●●●●●●●●●●●●●●●●●●●●●●●●●●●●●●●●●●●●●●●●●●●●●●●●●●●●●●●●●●●●●●●●●●●●●●●●●●●●●●●●●●●●●●●●●●●●●●●●●●●●●●●●●●●●●●●●●●●●●●●●●●●●●●●●●●●●●●●●●●●●●●●●●●●●●●●●●●●●●●●●●●●●●●●●●●●●●●●●●●●●●●●●●●●●●●●●●●●●●●●●●●●●●●●●●●●●●●●●●●●●●●●●●●●●●●●●●●●●●●●●●●●●●●●●●●●●●●●●●●●●●●●●●●●●●●●●●●●●●●●●●●●●●●●●●●●●●●●●●●●●●●●●●●●●●●●●●●●●●●●●●●●●●●●●●●●●●●●●●●●●●●●●●●●●●●●●●●●●●●●●●●●●●●●●●●●●●●●●●●●●●●●●●●●●●●●●●●●●●●●●●●●●●●●●●●●●●●●●●●●●●●●●●●●●●●●●●●●●●●●●●●●●●●●●●●●●●●●●●●●●●●●●●●●●●●●●●●●●●●●●●●●●●●●●●●●●●●●●●●●●●●●●●●●●●●●●●●●●●●●●●●●●●●●●●●●●●●●●●●●●●●●●●●●●●●●●●●●●●●●●●●●●●●●●●●●●●●●●●●●●●●●●●●●●●●●●●●●●●●●●●●●●●●●●●●●●●●●●●●●●●●●●●●●●●●●●●●●●●●●●●●●●●●●●●●●●●●●●●●●●●●●●●●●●●●●●●●●●●●●●●●●●●●●●●●●●●●●●●●●●●●●●●●●●●●●●●●●●●●●●●●●●●●●●●●●●●●●●●●●●●●●●●●●●●●●●●●●●●●●●●●●●●●●●●●●●●●●●●●●●●●●●●●●●●●●●●●●●●●●●●●●●●●●●●●●●●●●●●●●●●●●●●●●●●●●●●●●●●●●●●●●●●●●●●●●●●●●●●●●●●●●●●●●●●●●●●●●●●●●●●●●●●●●●●●●●●●●●●●●●●●●●●●●●●●●●●●●●●●●●●●●●●●●●●●●●●●●●●●●●●●●●●●●●●●●●●●●●●●●●●●●●●●●●●●●●●●●●●●●●●●●●●●●●●●●●●●●●●●●●●●●●●●●●●●●●●●●●●●●●●●●●●●●●●●●●●●●●●●●●●●●●●●●●●●●●●●●●●●●●●●●●●●●●●●●●●●●●●●●●●●●●●●●●●●●●●●●●●●●●●●●●●●●●●●●●●●●●●●●●●●●●●●●●●●●●●●●●●●●●●●●●●●●●●●●●●●●●●●●●●●●●●●●●●●●●●●●●●●●●●●●●●●●●●●●●●●●●●●●●●●●●●●●●●●●●●●●●●●●●●●●●●●●●●●●●●●●●●●●●●●●●●●●●●●●●●●●●●●●●●●●●●●●●●●●●●●●●●●●●●●●●●●●●●●●●●●●●●●●●●●●●●●●●●●●●●●●●●●●●●●●●●●●●●●●●●●●●●●●●●●●●●●●●●●●●●●●●●●●●●●●●●●●●●●●●●●●●●●●●●●●●●●●●●●●●●●●●●●●●●●●●●●●●●●●●●●●●●●●●●●●●●●●●●●●●●●●●●●●●●●●●●●●●●●●●●●●●●●●●●●●●●●●●●●●●●●●●●●●●●●●●●●●●●●●●●●●●●●●●●●●●●●●●●●●●●●●●●●●●●●●●●●●●●●●●●●●●●●●●●●●●●●●●●●●●●●●●●●●●●●●●●●●●●●●●●●●●●●●●●●●●●●●●●●●●●●●●●●●●●●●●●●●●●●●●●●●●●●●●●●●●●●●●●●●●●●●●●●●●●●●●●●●●●●●●●●●●●●●●●●●●●●●●●●●●●●●●●●●●●●●●●●●●●●●●●●●●●●●●●●●●●●●●●●●●●●●●●●●●●●●●●●●●●●●●●●●●●●●●●●●●●●●●●●●●●●●●●●●●●●●●●●●●●●●●●●●●●●●●●●●●●●●●●●●●●●●●●●●●●●●●●●●●●●●●●●●●●●●●●●●●●●●●●●●●●●●●●●●●●●●●●●●●●●●●●●●●●●●●●●●●●●●●●●●●●●●●●●●●●●●●●●●●●●●●●●●●●●●●●●●●●●●●●●●●●●●●●●●●●●●●●●●●●●●●●●●●●●●●●●●●●●●●●●●●●●●●●●●●●●●●●●●●●●●●●●●●●●●●●●●●●●●●●●●●●●●●●●●●●●●●●●●●●●●●●●●●●●●●●●●●●●●●●●●●●●●●●●●●●●●●●●●●●●●●●●●●●●●●●●●●●●●●●●●●●●●●●●●●●●●●●●●●●●●●●●●●●●●●●●●●●●●●●●●●●●●●●●●●●●●●●●●●●●●●●●●●●●●●●●●●●●●●●●●●●●●●●●●●●●●●●●●●●●●●●●●●●●●●●●●●●●●●●●●●●●● |      |      |      |      |      |      |      |  |

|              | 3290                                                                                                                                                                                                                                                                                                                                                                                                                                                                                                                                                                                                                                                                                                                                                                                                                                                                                                                                                                                                                                                                                                                                                                                                                                                                                                                                                                                                                                                                                                                                                                                                                                                                                                                                                                                                                                                                                                                                                                                                                                                                                                                                                                                                                                                                                                                                                                                                                                                                                                                                                                                                                                                                                                                                                                                                                                                                                                                                                                                                                                                                                                                                                                                                                                                                                                                                                                                                                                                                                                                                                                                                                                                                                                                                                                                                                                                                                                                                                                                                                                                                                                                                                                                                                                                                                                                                                                                                                                                                                                                                                                                                                                                                                                                                                                                                                                                                                                                                                                                                                                                                                                                                                                                                                                                                                                                                                                                                                                                                                                                                                                                                                                                                                                                                                                                                                                                                                                                                                                                                                                                                                                                                                                                                                                                                                                                                                                                                                                                                                                                                                                                                                                                                                                                                                                                                                                                                                                                                                                                                                                                                                                                                                                                                                                                                                                                                                                                                                                                                                                                                                                                                                                                                                                                                                                                                                                                                                                                                                                                                                                                                                                                                                                                                                                                                                                                                                                                                                                                                                                                                                                                                                                                                                                                                                                                                                                                                                                                                                                                                                                                                                                                                                                                                                                                                                                                                                                                                                                                                                                                                                                                                                                                                                                                                                                                                                                                                                                                                                                                                                                                                                                                                                                                                                                                                                                                                                                                                                                                                                                                                                                                                                                                                                                                                                                                                                                                                                                                                                                                                                                                                                                                                                                                                                                                                                                                                                                                                                                                                                                                                                                                                                                                                                                                                                                                                                                                                                                                                                                                                                                                                                                                                                                                                                                                                                                                                                                                                                                                                                                                                                                                                                                                                                                                                                                                            | 3300 | 3310 | 3320 | 3330 | 3340 | 3350 | 3360 |  |
|--------------|-------------------------------------------------------------------------------------------------------------------------------------------------------------------------------------------------------------------------------------------------------------------------------------------------------------------------------------------------------------------------------------------------------------------------------------------------------------------------------------------------------------------------------------------------------------------------------------------------------------------------------------------------------------------------------------------------------------------------------------------------------------------------------------------------------------------------------------------------------------------------------------------------------------------------------------------------------------------------------------------------------------------------------------------------------------------------------------------------------------------------------------------------------------------------------------------------------------------------------------------------------------------------------------------------------------------------------------------------------------------------------------------------------------------------------------------------------------------------------------------------------------------------------------------------------------------------------------------------------------------------------------------------------------------------------------------------------------------------------------------------------------------------------------------------------------------------------------------------------------------------------------------------------------------------------------------------------------------------------------------------------------------------------------------------------------------------------------------------------------------------------------------------------------------------------------------------------------------------------------------------------------------------------------------------------------------------------------------------------------------------------------------------------------------------------------------------------------------------------------------------------------------------------------------------------------------------------------------------------------------------------------------------------------------------------------------------------------------------------------------------------------------------------------------------------------------------------------------------------------------------------------------------------------------------------------------------------------------------------------------------------------------------------------------------------------------------------------------------------------------------------------------------------------------------------------------------------------------------------------------------------------------------------------------------------------------------------------------------------------------------------------------------------------------------------------------------------------------------------------------------------------------------------------------------------------------------------------------------------------------------------------------------------------------------------------------------------------------------------------------------------------------------------------------------------------------------------------------------------------------------------------------------------------------------------------------------------------------------------------------------------------------------------------------------------------------------------------------------------------------------------------------------------------------------------------------------------------------------------------------------------------------------------------------------------------------------------------------------------------------------------------------------------------------------------------------------------------------------------------------------------------------------------------------------------------------------------------------------------------------------------------------------------------------------------------------------------------------------------------------------------------------------------------------------------------------------------------------------------------------------------------------------------------------------------------------------------------------------------------------------------------------------------------------------------------------------------------------------------------------------------------------------------------------------------------------------------------------------------------------------------------------------------------------------------------------------------------------------------------------------------------------------------------------------------------------------------------------------------------------------------------------------------------------------------------------------------------------------------------------------------------------------------------------------------------------------------------------------------------------------------------------------------------------------------------------------------------------------------------------------------------------------------------------------------------------------------------------------------------------------------------------------------------------------------------------------------------------------------------------------------------------------------------------------------------------------------------------------------------------------------------------------------------------------------------------------------------------------------------------------------------------------------------------------------------------------------------------------------------------------------------------------------------------------------------------------------------------------------------------------------------------------------------------------------------------------------------------------------------------------------------------------------------------------------------------------------------------------------------------------------------------------------------------------------------------------------------------------------------------------------------------------------------------------------------------------------------------------------------------------------------------------------------------------------------------------------------------------------------------------------------------------------------------------------------------------------------------------------------------------------------------------------------------------------------------------------------------------------------------------------------------------------------------------------------------------------------------------------------------------------------------------------------------------------------------------------------------------------------------------------------------------------------------------------------------------------------------------------------------------------------------------------------------------------------------------------------------------------------------------------------------------------------------------------------------------------------------------------------------------------------------------------------------------------------------------------------------------------------------------------------------------------------------------------------------------------------------------------------------------------------------------------------------------------------------------------------------------------------------------------------------------------------------------------------------------------------------------------------------------------------------------------------------------------------------------------------------------------------------------------------------------------------------------------------------------------------------------------------------------------------------------------------------------------------------------------------------------------------------------------------------------------------------------------------------------------------------------------------------------------------------------------------------------------------------------------------------------------------------------------------------------------------------------------------------------------------------------------------------------------------------------------------------------------------------------------------------------------------------------------------------------------------------------------------------------------------------------------------------------------------------------------------------------------------------------------------------------------------------------------------------------------------------------------------------------------------------------------------------------------------------------------------------------------------------------------------------------------------------------------------------------------------------------------------------------------------------------------------------------------------------------------------------------------------------------------------------------------------------------------------------------------------------------------------------------------------------------------------------------------------------------------------------------------------------------------------------------------------------------------------------------------------------------------------------------------------------------------------------------------------------------------------------------------------------------------------------------------------------------------------------------------------------------------------------------------------------------------------------------------------------------------------------------------------------------------------------------------------------------------------------------------------------------------------------------------------------------------------------------------------------------------------------------------------------------------------------------------------------------------------------------------------------------------------------------------------------------------------------------------------------------------------------------------------------------------------------------------------------------------------------------------------------------------------------------------------------------------------------------------------------------------------------------------------------------------------------------------------------------------------------------------------------------------------------------------------------------------------------------------------------------------------------------------------------------------------------------------------------------------------------------------------------------------------------------------------------------------------------------------------------------------------------------------------------------------------------------------------------------------------------------------------------------------------------------------------------------------------------------------------------------------------------------------------------------------------------------------------------------------------------------------------------------------------------------------------------------------------------------------------------------------------------------------------------------------------------------------------------------------------------------------------------------|------|------|------|------|------|------|------|--|
| conservation | ●●●●●●●●●●●●●●●●●●●●●●●●●●●●●●●●●●●●●●●●●●●●●●●●●●●●●●●●●●●●●●●●●●●●●●●●●●●●●●●●●●●●●●●●●●●●●●●●●●●●●●●●●●●●●●●●●●●●●●●●●●●●●●●●●●●●●●●●●●●●●●●●●●●●●●●●●●●●●●●●●●●●●●●●●●●●●●●●●●●●●●●●●●●●●●●●●●●●●●●●●●●●●●●●●●●●●●●●●●●●●●●●●●●●●●●●●●●●●●●●●●●●●●●●●●●●●●●●●●●●●●●●●●●●●●●●●●●●●●●●●●●●●●●●●●●●●●●●●●●●●●●●●●●●●●●●●●●●●●●●●●●●●●●●●●●●●●●●●●●●●●●●●●●●●●●●●●●●●●●●●●●●●●●●●●●●●●●●●●●●●●●●●●●●●●●●●●●●●●●●●●●●●●●●●●●●●●●●●●●●●●●●●●●●●●●●●●●●●●●●●●●●●●●●●●●●●●●●●●●●●●●●●●●●●●●●●●●●●●●●●●●●●●●●●●●●●●●●●●●●●●●●●●●●●●●●●●●●●●●●●●●●●●●●●●●●●●●●●●●●●●●●●●●●●●●●●●●●●●●●●●●●●●●●●●●●●●●●●●●●●●●●●●●●●●●●●●●●●●●●●●●●●●●●●●●●●●●●●●●●●●●●●●●●●●●●●●●●●●●●●●●●●●●●●●●●●●●●●●●●●●●●●●●●●●●●●●●●●●●●●●●●●●●●●●●●●●●●●●●●●●●●●●●●●●●●●●●●●●●●●●●●●●●●●●●●●●●●●●●●●●●●●●●●●●●●●●●●●●●●●●●●●●●●●●●●●●●●●●●●●●●●●●●●●●●●●●●●●●●●●●●●●●●●●●●●●●●●●●●●●●●●●●●●●●●●●●●●●●●●●●●●●●●●●●●●●●●●●●●●●●●●●●●●●●●●●●●●●●●●●●●●●●●●●●●●●●●●●●●●●●●●●●●●●●●●●●●●●●●●●●●●●●●●●●●●●●●●●●●●●●●●●●●●●●●●●●●●●●●●●●●●●●●●●●●●●●●●●●●●●●●●●●●●●●●●●●●●●●●●●●●●●●●●●●●●●●●●●●●●●●●●●●●●●●●●●●●●●●●●●●●●●●●●●●●●●●●●●●●●●●●●●●●●●●●●●●●●●●●●●●●●●●●●●●●●●●●●●●●●●●●●●●●●●●●●●●●●●●●●●●●●●●●●●●●●●●●●●●●●●●●●●●●●●●●●●●●●●●●●●●●●●●●●●●●●●●●●●●●●●●●●●●●●●●●●●●●●●●●●●●●●●●●●●●●●●●●●●●●●●●●●●●●●●●●●●●●●●●●●●●●●●●●●●●●●●●●●●●●●●●●●●●●●●●●●●●●●●●●●●●●●●●●●●●●●●●●●●●●●●●●●●●●●●●●●●●●●●●●●●●●●●●●●●●●●●●●●●●●●●●●●●●●●●●●●●●●●●●●●●●●●●●●●●●●●●●●●●●●●●●●●●●●●●●●●●●●●●●●●●●●●●●●●●●●●●●●●●●●●●●●●●●●●●●●●●●●●●●●●●●●●●●●●●●●●●●●●●●●●●●●●●●●●●●●●●●●●●●●●●●●●●●●●●●●●●●●●●●●●●●●●●●●●●●●●●●●●●●●●●●●●●●●●●●●●●●●●●●●●●●●●●●●●●●●●●●●●●●●●●●●●●●●●●●●●●●●●●●●●●●●●●●●●●●●●●●●●●●●●●●●●●●●●●●●●●●●●●●●●●●●●●●●●●●●●●●●●●●●●●●●●●●●●●●●●●●●●●●●●●●●●●●●●●●●●●●●●●●●●●●●●●●●●●●●●●●●●●●●●●●●●●●●●●●●●●●●●●●●●●●●●●●●●●●●●●●●●●●●●●●●●●●●●●●●●●●●●●●●●●●●●●●●●●●●●●●●●●●●●●●●●●●●●●●●●●●●●●●●●●●●●●●●●●●●●●●●●●●●●●●●●●●●●●●●●●●●●●●●●●●●●●●●●●●●●●●●●●●●●●●●●●●●●●●●●●●●●●●●●●●●●●●●●●●●●●●●●●●●●●●●●●●●●●●●●●●●●●●●●●●●●●●●●●●●●●●●●●●●●●●●●●●●●●●●●●●●●●●●●●●●●●●●●●●●●●●●●●●●●●●●●●●●●●●●●●●●●●●●●●●●●●●●●●●●●●●●●●●●●●●●●●●●●●●●●●●●●●●●●●●●●●●●●●●●●●●●●●●●●●●●●●●●●●●●●●●●●●●●●●●●●●●●●●●●●●●●●●●●●●●●●●●●●●●●●●●●●●●●●●●●●●●●●●●●●●●●●●●●●●●●●●●●●●●●●●●●●●●●●●●●●●●●●●●●●●●●●●●●●●●●●●●●●●●●●●●●●●●●●●●●●●●●●●●●●●●●●●●●●●●●●●●●●●●●●●●●●●●●●●●●●●●●●●●●●●●●●●●●●●●●●●●●●●●●●●●●●●●●●●●●●●●●●●●●●●●●●●●●●●●●●●●●●●●●●●●●●●●●●●●●●●●●●●●●●●●●●●●●●●●●●●●●●●●●●●●●●●●●●●●●●●●●●●●●●●●●●●●●●●●●●●●●●●●●●●●●●●●●●●●●●●●●●●●●●●●●●●●●●●●●●●●●●●●●●●●●●●●●●●●●●●●●●●●●●●●●●●●●●●●●●●●●●●●●●●●●●●●●●●●●●●●●●●●●●●●●●●●●●●●●●●●●●●●●●●●●●●●●●●●●●●●●●●●●●●●●●●●●●●●●●●●●●●●●●●●●●●●●●●●●●●●●●●●●●●●●●●●●●●●●●●●●●●●●●●●●●●●●●●●●●●●●●●●●●●●●●●●●●●●●●●●●●●●●●●●●●●●●●●●●●●●●●●●●●●●●●●●●●●●●●●●●●●●●●●●●●●●●●●●●●●●●●●●●●●●●●●●●●●●●●●●●●●●●●●●●●●●●●●●●●●●●●●●●●●●●●●●●●●●●●●●●●●●●●●●●●●●●●●●●●●●●●●●●●●●●●●●●●●●●●●●●●●●●●●●●●●●●●●●●●●●●●●●●●●●●●●●●●●●●●●●●●●●●●●●●●●●●●●●●●●●●●●●●●●●●●●●●●●●●●●●●●●●●●●●●●●●●●●●●●●●●●●●●●●●●●●●●●●●●●●●●●●●●●●●●●●●●●●●●●●●●●●●●●●●●●●●●●●●●●●●●●●●●●●●●●●●●●●●●●●●●●●●●●●●●●●●●●●●●●●●●●●●●●●●●●●●●●●●●●●●●●●●●●●●●●●●●●●●●●●●●●●●●●●●●●●●●●●●●●●●●●●●●●●●●●●●●●●●●●●●●●●●●●●●●●●●●●●●●●●●●●●●●●●●●●●●●●●●●●●●●●●●●●●●●●●●●●●●●●●●●●●●●●●●●●●●●●●●●●●●●●●●●●●●●●●●●●●●●●●●●●●●●●●●●●●●●●●●●●●●●●●●●●●●●●●●●●●●●●●●●●●●●●●●●●●●●●●●●●●●●●●●●●●●●●●●●●●●●●●●●●●●●●●●●●●●●●●●●●●●●●●●●●●●●●●●●●●●●●●●●●●●●●●●●●●●●●●●●●●●●●●●●●●●●●●●●●●●●●●●●●●●●●●●●●●●●●●●●●●●●●●●●●●●●●●●●●●●●●●●●●●●●●●●●●●●●●●●●●●●●●●●●●●●●●●●●●●●●●●●●●●●●●●●●●●●●●●●●●●●●●●●●●●●●●●●●●●●●●●●●●●●●●●●●●●●●●●●●●●●●●●●●●●●●●●●●●●●●●●●●●●●●●●●●●●●●●●●●●●●●●●●●●●●●●●●●●●●●●●●●●●●●●●●●●●●●●●●●●●●●●●●●●●●●●●●●●●●●●●●●●●●●●●●●●●●●●●●●●●●●●●●●●●●●●●●●●●●●●●●●●●●●●●●●●●●●●●●●●●●●●●●●●●●●●●●●●●●●●●●●●●●●●●●●●●●●●●●●●●●●●●●●●●●●●●●●●●●●●●●●●●●●●●●●●●●●●●●●●●●●●●●●●●●●●●●●●●●●●●●●●●●●●●●●●●●●●●●●●●●●●●●●●●●●●●●●●●●●●●●●●●●●●●●●●●●●●●●●●●●●●●●●●●●●●●●●●●●●●●●●●●●●●●●●●●●●●●●●●●●●●●●●●●●●●●●●●●●●●●●●●●●●●●●●●●●●●●●●●●●●●●●●●●●●●●●●●●●●●●●●●●●●●●●●●●●●●●●●●●●●●●●●●●●●●●●●●●●●●●●●●●●●●●●●●●●●●●●●●●●●●●●●●●●●●●●●●●●●●●●●●●●●●●●●●●●●●●●●●●●●●●●●●●●●●●●●●●●●●●●●●●●●●●●●●●●●●●●●●●●●●●●●●●●●●●●●●●●●●●●●●●●●●●●●●●●●●●●●●●●●●●●●●●●●●●●●●●●●●●●●●●●●●●●●●●●●●●●●●●●●●●●●●●●●●●●●●●●●●●●●●●●●●●●●●●●●●●●●●●●●●●●●●●●●●●●●●●●●●●●●●●●●●●●●●●●●●●●●●●●●●●●●●●●●●●●●●●●●●●●●●●●●●●●●●●●●●●●●●●●●●●●●●●●●●●●●●●●●●●●●●●●●●●●●●●●●●●●●●●●●●●●●●●●●●●●●●●●●●●●●●●●●●●●●●●●●●●●●●●●●●●●●●●●●●●●●●●●●●●●●●●●●●●●●●●●●●●●●●●●●●●●●●●●●●●●●●●●●●●●●●●●●●●●●●●●●●●●●●●●●●●●●●●●●●●●●●●●●●●●●●●●●●●●●●●●●●●●●●●●●●●●●●●●●●●●●●●●●●●●●●●●●●●●●●●●●●●●●●●●●●●●●●●●●●●●●●●●●●●●●●●●●●●●●●●●●●●●●●●●●●●●●●●●●●●●●●●●●●●●●●●●●●●●●●●●●●●●●●●●●●●●●●●●●●●●●●●●●●●●●●●●●●●●●●●●●●●●●●●●●●●●●●●●●●●●●●●●●●●●●●●●●●●●●●●●●●●●●●●●●●●●●●●●●●●●●●●●●●●●●●●●●●●●●●●●●●●●●●●●●●●●●●●●●●●●●●●●●●●●●●●●●●●●●●●●●●●●●●●●●●●●●●●●●●●●●●●●●●●●●●●●●●●●●●●●●●●●●●●●●●●●●●●●●●●●●●●●●●●●●●●●●●●●●●●●●●●●●●●●●●●●●●●●●●●●●●●●●●●●●●●●●●●●●●●●●●●●●●●●●●●●●●●●●●●●●●●●●●●●●●●●●●●●●●●●●●●●●●●●●●●●●●●●●●●●●●●●●●●●●●●●●●●●●●●●●●●●●●●●●●●●●●●●●●●●●●●●●●●●●●●●●●●●●●●●●●●●●●●●●●●●●●●●●●●●●●●●●●●●●●●●●●●●●●●●●●●●●●●●●●●●●●●●●●●●●●●●●●●●●●●●●●●●●●●●●●●●●●●●●●●●●●●●●●●●●●●●●●●●●●●●●●●●●●●●●●●●●●●●●●●●●●●●●●●●●●●●●●●●●●●●●●●●●●●●●●●●●●●●●●●●●●●●●●●●●●●●●●●●●●●●●●●●●●●●●●●●●●●●●●●●●●●●●●●●●●●●●●●●●●●●●●●●●●●●●●●●●●●●●●●●●●●●●●●●●●●●●●●●●●●●●●●●●●●●●●●●●●●●●●●●●●●●●●●●●●●●●●●●●●●●●●●●●●●●●●●●●●●●●●●●●●●●●●●●●●●●●●●●●●●●●●●●●●●●●●●●●●●●●●●●●●●●●●●●●●●●●●●●●●●●●●●●●●●●●●●●●●●●●●●●●●●●●●●●●●●●●●●●●●●●●●●●●●●●●●●●●●●●●●●●●●●●●●●●●●●●●●●●●●●●●●●●●●●●●●●●●●●●●●●●●●●●●●●●●●●●●●●●●●●●●●●●●●●●●●●●●●●●●●●●●●●●●●●●●●●●●●●●●●●●●●●●●●●●●●●●●●●●●●●●●●●●●●●●●●●●●●●●●●●●●●●●●●●●●●●●●●●●●●●●●●●●●●●●●●●●●●●●●●●●●●●●●●●●●●●●●●●●●●●●●●●●●●●●●●●●●●●●●●●●●●●●●●●●●●●●●●●●●●●●●●●●●●●●●●●●●●●●●●●●●●●●●●●●●●●●●●●●●●●●●●●●●●●●●●●●●●●●●●●●●●●●●●●●●●●●●●●●●●●●●●●●●●●●●●●●●●●●●●●●●●●●●●●●●●●●●●●●●●●●●●●●●●●●●●●●●●●●●●●●●●●●●●●●●●●●●●●●●●●●●●●●●●●●●●●●●●●●●●●●●●●●●●●●●●●●●●●●●●●●●●●●●●●●●●●●●●●●●●●●●●●●●●●●●●●●●●●●●●●●●●●●●●●●●●●●●●●●●●●●●●●●●●●●●●●●●●●●●●●●●●●●●●●●●●●●●●●●●●●●●●●●●●●●●●●●●●●●●●●●●●●●●●●●●●●●●●●●●●●●●●●●●●●●●●●●●●●●●●●●●●●●●●●●●●●●●●●●●●●●●●●●●●●●●●●●●●●●●●●●●●●●●●●●●●●●●●●●●●●●●●●●●●●●●●●●●●●●●●●●●●●●●●●●●●●●●●●●●●●●●●●●●●●●●●●●●●●●●●●●●●●●●●●●●●●●●●●●●●●●●●●●●●●●●●●●●●●●●●●●●●●●●●●●●●●●●●●●●●●●●●●●●●●●●●●●●●●●●●●●●●●●●●●●●●●●●●●●●●●●●●●●●●●●●●●●●●●●●●●●●●●●●●●●●●●●●●●●●●●●●●●●●●●●●●●●●●●●●●●●●●●●●●●●●●●●●●●●●●●●●●●●●●●●●●●●●●●●●●●●●●●●●●●●●●●●●●●●●●●●●●●●●●●●●●●●●●●●●●●●●●●●●●●●●●●●●●●●●●●●●●●●●●●●●●●●●●●●●●●●●●●●●●●●●●●●●●●●●●●●●●●●●●●●●●●●●●●●●●●●●●●●●●●●●●●●●●●●●●●●●●●●●●●●●●●●●●●●●●●●●●●●●●●●●●●●●●●●●●●●●●●●●●●●●●●●●●●●●●●●●●●●●●●●●●●●●●●●●●●●●●●●●●●●●●●●●●●●●●●●●●●●●●●●●●●●●●●●●●●●●●●●●●●●●●●●●●●●●●●●●●●●●●●●●●●●●●●●●●●●●●●●●●●●●●●●●●●●●●●●●●●●●●●●●●●●●●●●●●●●●●●●●●●●●●●●●●●●●●●●●●●●●●●●●●●●●●●●●●●●●●●●●●●●●●●●●●●●●●●●●●●●●●●●●●●●●●●●●●●●●●●●●●●●●●●●●●●●●●●●●●●●●●●●●●●●●●●●●●●●●●●●●●●●●●●●●●●●●●●●●●●●●●●●●●●●●●●●●●●●●●●●●●●●●●●●●●●●●●●●●●●●●●●●●●●●●●●●●●●●●●●●●●●●●●●●●●●●●●●●●●●●●●●●●●●●●●●●●●●●●●●●●●●●●●●●●●●●●●●●●●●●●●●●●●●●●●●●●●●●●●●●●●●●●●●●●●●●●●●●●●●●●●●●●●●●●●●●●●●●●●●●●●●●●●●●●●●●●●●●●●●●●●●●●●●●●●●●●●●●●●●●●●●●●●●●●●●●●●●●●●●●●●●●●●●●●●●●●●●●●●●●●●●●●●●●●●●●●●●●●●●●●●●●●●●●●●●●●●●●●●●●●●●●●●●●●●●●●●●●●●●●●●●●●●●●●●●●●●●●●●●●●●●●●●●●●●●●●●●●●●●●●●●●●●●●●●●●●●●●●●●●●●●●●●●●●●●●●●●●●●●●●●●●●●●●●●●●●●●●●●●●●●●●●●●●●●●●●●●●●●●●●●●●●●●●●●●●●●●●●●●●●●●●●●●●●●●●●●●●●●●●●●●●●●●●●●●●●●●●●●●●●●●●●●●●●●●●●●●●●●●●●●●●●●●●●●●●●●●●●●●●●●●●●●●●●●●●●●●●●●●●●●●●●●●●●●●●●●●●●●●●●●●●●●●●●●●●●●●●●●●●●●●●●●●●●●●●●●●●●●●●●●●●●●●●●●●●●●●●●●●●●●●●●●●●●●●●●●●●●●●●●●●●●●●●●●●●●●●●●●●●●●●●●●●●●●●●●●●●●●●●●●●●●●●●●●●●●●●●●●●●●●●●●●●●●●●●●●●●●●●●●●●●●●●●●●●●●●●●●●●●●●●●●●●●●●●●●●●●●●●●●●●●●●●●●●●●●●●●●●●●●●●●●●●●●●●●●●●●●●●●●●●●●●●●●●●●●●●●●●●●●●●●●●●●●●●●●●●●●●●●●●●●●●●●●●●●●●●●●●●●●●●●●●●●●●●●●●●●●●●●●●●●●●●●●●●●●●●●●●●●●●●●●●●●●●●●●●●●●●●●●●●●●●●●●●●●●●●●●●●●●●●●●●●●●●●●●●●●●●●●●●●●●●●●●●●●●●●●●●●●●●●●●●●●●●●●●●●●●●●●●●●●●●●●●●●●●●●●●●●●●●●●●●●●●●●●●●●●●●●●●●●●●●●●●●●●●●●●●●●●●●●●●●●●●●●●●●●●●●●●●●●●●●●●●●●●●●●●●●●●●●●●●●●●●●●●●●●●●●●●●●●●●●●●●●●●●●●●●●●●●●●●●●●●●●●●●●●●●●●●●●●●●●●●●●●●●●●●●●●●●●●●●●●●●●●●●●●●●●●●●●●●●●●●●●●●●●●●●●●●●●●●●●●●●●●●●●●●●●●●●●●●●●●●●●●●●●●●●●●●●●●●●●●●●●●●●●●●●●●●●●●●●●●●●●●●●●●●●●●●●●●●●●●●●●●●●●●●●●●●●●●●●●●●●●●●●●●●●●●●●●●●●●●●●●●●●●●●●●●●●●●●●●●●●●●●●●●●●●●●●●●●●●●●●●●●●●●●●●●●●●●●●●●●●●●●●●●●●●●●●●●●●●●●●●●●●●●●●●●●●●●●●●●●●●●●●●●●●●●●●●●●●●●●●●●●●●●●●●●●●●●●●●●●●●●●●●●●●●●●●●●●●●●●●●●●●●●●●●●●●●●●●●●●●●●●●●●●●●●●●●●●●●●●●●●●●●●●●●●●●●●●●●●●●●●●●●●●●●●●●●●●●●●●●●●●●●●●●●●●●●●●●●●●●●●●●●●●●●●●●●●●●●●●●●●●●●●●●●●●●●●●●●●●●●●●●●●●●●●●●●●●●●●●●●●●●●●●●●●●●●●●●●●●●●●●●●●●●●●●●●●●●●●●●●●●●●●●●●●●●●●●●●●●●●●●●●●●●●●●●●●●●●●●●●●●●●●●●●●●●●●●●●●●●●●●●●●●●●●●●●●●●●●●●●●●●●●●●●●●●●●●●●●●●●●●●●●●●●●●●●●●●●●●●●●●●●●●●●●●●●●●●●●●●●●●●●●●●●●●●●●●●●●●●●●●●●●●●●●●●●●●●●●●●●●●●●●●●●●●●●●●●●●●●●●●●●●●●●●●●●●●●●●●●●●●●●●●●●●●●●●●●●●●●●●●●●●●●●●●●●●●●●●●●●●●●●●●●●●●●●●●●●●●●●●●●●●●●●●●●●●●●●●●●●●●●●●●●●●●●●●●●●●●●●●●●●●●●●●●●●●●●●●●●●●●●●●●●●●●●●●●●●●●●●●●●●●●●●●●●●●●●●●●●●●●●●●●●●●●●●●●●●●●●●●●●●●●●●●●●●●●●●●●●●●●●●●●●●●●●●●●●●●●●●●●●●●●●●●●●●●●●●●●●●●●●●●●●●●●●●●●●●●●●●●●●●●●●●●●●●●●●●●●●●●●●●●●●●●●●●●●●●●●●●●●●●●●●●●●●●●●●●●●●●●●●●●●●●●●●●●●●●●●●●●●●●●●●●●●●●●●●●●●●●●●●●●●●●●●●●●●●●●●●●●●●●●●●●●●●●●●●●●●●●●●●●●●●●●●●●●●●●●●●●●●●●●●●●●●●●●●●●●●●●●●●●●●●●●●●●●●●●●●●●●●●●●●●●●●●●●●●●●●●●●●●●●●●●●●●●●●●●●●●●●●●●●●●●●●●●●●●●●●●●●●●●●●●●●●●●●●●●●●●●●●●●●●●●●●●●●●●●●●●●●●●●●●●●●●●●●●●●●●●●●●●●●●●●●●●●●●●●●●●●●●●●●●●●●●●●●●●●●●●●●●●●●●●●●●●●●●●●●●●●●●●●●●●●●●●●●●●●●●●●●●●●●●●●●●●●●●●●●●●●●●●●●●●●●●●●●●●●●●●●●●●●●●●●●●●●●●●●●●●●●●●●●●●●●●●●●●●●●●●●●●●●●●●●●●●●●●●●●●●●●●●●●●●●●●●●●●●●●●●●●●●●●●●●●●●●●●●●●●●●●●●●●●●●●●●●●●●●●●●●●●●●●●●●●●●●●●●●●●●●●●●●●●●●●●●●●●●●●●●●●●●●●●●●●●●●●●●●●●●●●●●●●●●●●●●●●●●●●●●●●●●●●●●●●●●●●●●●●●●●●●●●●●●●●●●●●●●●●●●●●●●●●●●●●●●●●●●●●●●●●●●●●●●●●●●●●●●●●●●●●●●●●●●●●●●●●●●●●●●●●●●●●●●●●●●●●●●●●●●●●●●●●●●●●●●●●●●●●●●●●●●●●●●●●●●●●●●●●●●●●●●●●●●●●●●●●●●●●●●●●●●●●●●●●●●●●●●●●●●●●●●●●●●●●●●●●●●●●●●●●●●●●●●●●●●●●●●●●●●●●●●●●●●●●●●●●●●●●●●●●●●●●●●●●●●●●●●●●●●●●●●●●●●●●●●●●●●●●●●●●●●●●●●●●●●●●●●●●●●●●●●●●●●●●●●●●●●●●●●●●●●●●●●●●●●●●●●●●●●●●●●●●●●●●●●●●●●●●●●●●●●●●●●●●●●●●●●●●●●●●●●●●●●●●●●●●●●●●●●●●●●●●●●●●●●●●●●●●●●●●●●●●●●●●●●●●●●●●●●●●●●●●●●●●●●●●●●●●●●●●●●●●●●●●●●●●●●●●●●●●●●●●●●●●●●●●●●●●●●●●●●●●●●●●●●●●●●●●●●●●●●●●●●●●●●●●●●●●●●●●●●●●●●●●●●●●●●●●●●●●●●●●●●●●●●●●●●●●●●●●●●●●●●●●●●●●●●●●●●●●●●●●●●●●●●●●●●●●●●●●●●●●●●●●●●●●●●●●●●●●●●●●●●●●●●●●●●●●●●●●●●●●●●●●●●●●●●●●●●●●●●●●●●●●●●●●●●●●●●●●●●●●●●●●●●●●●●●●●●●●●●●●●●●●●●●●●●●●●●●●●●●●●●●●●●●●●●●●●●●●●●●●●●●●●●●●●●●●●●●●●●●●●●●●●●●●●●●●●●●●●●●●●●●●●●●●●●●●●●●●●●●●●●●●●●●●●●●●●●●●●●●●●●●●●●●●●●●●●●●●●●●●●●●●●●●●●●●●●●●●●●●●●●●●●●●●●●●●●●●●●●●●●●●●●●●●●●●●●●●●●●●●●●●●●●●●●●●●●●●●●●●●●●●●●●●●●●●●●●●●●●●●●●●●●●●●●●●●●●●●●●●●●●●●●●●●●●●●●●●●●●●●●●●●●●●●●●●●●●●●●●●●●●●●●●●●●●●●●●●●●●●●●●●●●●●●●●●●●●●●●●●●●●●●●●●●●●●●●●●●●●●●●●●●●●●●●●●●●●●●●●●●●●●●●●●●●●●●●●●●●●●●●●●●●●●●●●●●●●●●●●●●●●●●●●●●●●●●●●●●●●●●●●●●●●●●●●●●●●●●●●●●●●●●●●●●●●●●●●●●●●●●●●●●●●●●●●●●●●●●●●●●●●●●●●●●●●●●●●●●●●●●●●●●●●●●●●●●●●●●●●●●●●●●●●●●●●●●●●●●●●●●●●●●●●●●●●●●●●●●●●●●●●●●●●●●●●●●●●●●●●●●●●●●●●●●●●●●●●●●●●●●●●●●●●●●●●●●●●●●●●●●●●●●●●●●●●●●●●●●●●●●●●●●●●●●●●●●●●●●●●●●●●●●●●●●●●●●●●●●●●●●●●●●●●●●●●●●●●●●●●●●●●●●●●●●●●●●●●●●●●●●●●●●●●●●●●●●●●●●●●●●●●●●●●●●●●●●●●●●●●●●●●●●●●●●●●●●●●●●●●●●●●●●●●●●●●●●●●●●●●●●●●●●●●●●●●●●●●●●●●●●●●●●●●●●●●●●●●●●●●●●●●●●●●●●●●●●●●●●●●●●●●●●●●●●●●●●●●●●●●●●●●●●●●●●●●●●●●●●●●●●●●●●●●●●●●●●●●●●●●●●●●●●●●●●●●●●●●●●●●●●●●●●●●●●●●●●●●●●●●●●●●●●●●●●●●●●●●●●●●●●●●●●●●●●●●●●●●●●●●●●●●●●●●●●●●●●●●●●●●●●●●●●●●●●●●●●●●●●●●●●●●●●●●●●●●●●●●●●●●●●●●●●●●●●●●●●●●●●●●●●●●●●●●●●●●●●●●●●●●●●●●●●●●●●●●●●●●●●●●●●●●●●●●●●●●●●●●●●●●●●●●●●●●●●●●●●●●●●●●●●●●●●●●●●●●●●●●●●●●●●●●●●●●●●●●●●●●●●●●●●●●●●●●●●●●●●●●●●●●●●●●●●●●●●●●●●●●●●●●●●●●●●●●●●●●●●●●●●●●●●●●●●●●●●●●●●●●●●●●●●●●●●●●●●●●●●●●●●●●●●●●●●●●●●●●●●●●●●●●●●●●●●●●●●●●●●●●●●●●●●●●●●●●●●●●●●●●●●●●●●●●●●●●●●●●●●●●●●●●●●●●●●●●●●●●●●●●●●●●●●●●●●●●●●●●●●●●●●●●●●●●●●●●●●●●●●●●●●●●●●●●●●●●●●●●●●●●●●●●●●●●●●●●●●●●●●●●●●●●●●●●●●●●●●●●●●●●●●●●●●●●●●●●●●●●●●●●●●●●●●●●●●●●●●●●●●●●●●●●●●●●●●●●●●●●●●●●●●●●●●●●●●●●●●●●●●●●●●●●●●●●●●●●●●●●●●●●●●●●●●●●●●●●●●●●●●●●●●●●●●●●●●●●●●●●●●●●●●●●●●●●●●●●●●●●●●●●●●●●●●●●●●●●●●●●●●●●●●●●●●●●●●●●●●●●●●●●●●●●●●●●●●●●●●●●●●●●●●●●●●●●●●●●●●●●●●●●●●●●●●●●●●●●●●●●●●●●●●●●●●●●●●●●●●●●●●●●●●●●●●●●●●●●●●●●●●●●●●●●●●●●●●●●●●●●●●●●●●●●●●●●●●●●●●●●●●●●●●●●●●●●●●●●●●●●●●●●●●●●●●●●●●●●●●●●●●●●●●●● |      |      |      |      |      |      |      |  |





|                                      | 3530   | 3540             | 3550         | 3560           | 3570           | 3580          | 3590        | 3600         |      |
|--------------------------------------|--------|------------------|--------------|----------------|----------------|---------------|-------------|--------------|------|
| conservation                         |        |                  |              |                |                |               |             |              |      |
| <i>Callorhinchus milii</i>           | GAAGT  | TAATAACAGGGAAGC  | CAGATATGTCT  | GCTGAGCCTCTACT | GAACTACTTC     | AAGCCACTG     | CAGACTGGC   | TTATTG       | 3604 |
| <i>Alligator mississippiensis</i>    | GCAGC  | TTATCACCGGGCAGCC | AACATGTCT    | GCAGATGCCCTGAT | GATGAT         | TATTTGAGCCGCT | GATGACCTGGC | TGGTGG       | 3592 |
| <i>Anolis carolinensis</i>           | GCAAC  | TTATCACAGGGCAAC  | CCAAATGTCT   | GCTGATGCTTGT   | TGACTTATTT     | CAACCCACTG    | CAGACTGGC   | TCATCA       | 3664 |
| <i>Astyanax mexicanus</i>            | GGCTA  | TGATCACTGGCCAGC  | CCAAATGTCT   | GTGCAGCCTCTGAT | TGGAGTATTT     | CCAGCCCCTC    | ATCACC      | TGGCTCGAGC   | 3592 |
| <i>Boleophthalmus pectinirostris</i> | GGCCA  | TGATCACCGGTCAGC  | CCAAAATGAGC  | GCCTGCCGCTCAT  | TGGAGTATTT     | CAACCCACTC    | ATCACC      | TGGTTGGAGG   | 3598 |
| <i>Cynoglossus semilaevis</i>        | GACCA  | TGATCAGGGGCCAGC  | CCAAAATGACA  | CCGAGCCTCTCAT  | TGGAGTACTTT    | CAACCCCTC     | ATCCAG      | TGGCTGGAGT   | 3604 |
| <i>Danio rerio</i>                   | GAAGAT | CATCACAGGTCAGCC  | AAATGTCC     | GTCCAGCCTCTGAT | TGGAGTATTTT    | CAACCCGCTC    | ATCCAG      | TGGCTGGAGA   | 3712 |
| <i>Esox lucius</i>                   | GGCCA  | TGATCACTGGAGAGC  | CCGTATGTCC   | GCAAGCCACTGGT  | TGAGTACTTT     | CAACCCCTC     | ACTGAT      | TGGCTGGAGG   | 3598 |
| <i>Fundulus heteroclitus</i>         | GGCCA  | TGATCACGGGTCAGT  | CCAAAATGACT  | GCCAGCCGCTCAT  | TGCAGTACTTT    | TGAACCTCTC    | ATTAAAT     | TGGCTTGAGG   | 3610 |
| <i>Gekko japonicus</i>               | GCAGC  | TTATCACAGGACAGC  | CCAAATGTCT   | GAGAAGCATTGCT  | TGACCTATTTT    | CAACCCACTA    | CAAACT      | TGGCTAATCA   | 3604 |
| <i>Haplochromis burtoni</i>          | GGCTA  | TGATCACTGGCGAGT  | CCAAAATGAGT  | GCCAGCCACTCAT  | TGGAGTACTTT    | CAACCTCTC     | ATTGAA      | TGGCTTGAGA   | 3601 |
| <i>Hippocampus comes</i>             | GACCAT | TGATCACAGGCGAGCC | ACGATGAGC    | GCAAGCCGCTCAT  | TGGAGTATTTT    | TGAACCTCTC    | ATTAAAT     | TGGCTGGAGC   | 3586 |
| <i>Ictalurus punctatus</i>           | GGCCT  | TGATCACAGGTAAGC  | CCGTATGTCT   | GTACAGCCTCTGAT | TGGAGTACTTT    | TGAGCCCCTC    | ATCACC      | TGGCTAGAGA   | 3598 |
| <i>Larimichthys crocea</i>           | GGCCA  | TGATCACTGGCCAGC  | CCAAAATGACT  | GCCAGCCACTCAT  | TGCAGTATTTT    | CAACCTCTC     | ATTGAC      | TGGCTGGAGA   | 3595 |
| <i>Lates calcarifer</i>              | GACCA  | TGATCACTGGCCAGC  | CCAAAATGAGT  | GCCAGCCACTCAT  | TGCAGTATTTT    | CAACCTCTC     | ATTCAA      | TGGCTGGAGG   | 3598 |
| <i>Latimeria chalumnae</i>           | GACTC  | TCATCACTGGACAGC  | CTAACATGACA  | CTGAGGCTCTGAT  | TGAAGTATTTT    | TGAACCACTG    | ACAAAG      | TGGCTTATTA   | 3586 |
| <i>Lepisosteus oculatus</i>          | GACGT  | TGATCACTGGGCAGC  | CCAAATGTCT   | GCCAGGCTCTGCT  | TGAAATACTTT    | TGAGCCCCTG    | ATTACC      | TGGCTAGAGA   | 3586 |
| <i>Macaca fascicularis</i>           | GCAGC  | TGATCACGGGCCAGC  | CCAAATGAGC   | CTCCGGCCATG    | TGAGACTATTT    | CAAGCCGCTC    | TGCTGG      | ACTGGCTCCGCA | 3631 |
| <i>Manacus vitellinus</i>            | GCAGC  | TCATCACGGGCCAGC  | CCAAATGTCA   | GAGAGGCCCTGAT  | TGAGCTACTTT    | TGAGCCGCTC    | ATGACA      | TGGCTGGAGA   | 3583 |
| <i>Mus musculus</i>                  | GAAGC  | TGATCACAGGCCAGC  | CTAACATGTCA  | GCTCCGCCATG    | TGAATTACTTT    | CAAGCCACTG    | ACAGAA      | TGGCTCGTCA   | 3643 |
| <i>Neolamprologus brichardi</i>      | GGCTA  | TGATCACTGGCGAGT  | CCAAAATGAGT  | GCCAGCCACTCAT  | TGGAGTACTTT    | CCAGCCTCTC    | ATTGAA      | TGGCTTGAGA   | 3601 |
| <i>Oncorhynchus mykiss</i>           | GGCTA  | TGATCACTGGAGAGC  | CTACCATGTCT  | GCAAGCCACTGGT  | TACAGTACTTT    | CAACCTCTC     | ACTGAT      | TGGCTGGAGG   | 3598 |
| <i>Oreochromis niloticus</i>         | GGCTA  | TGATCACTGGCGAGT  | CCAAAATGAGT  | GCCAGCCACTCAT  | TGGAGTACTTT    | CCAGCCTCTT    | ATTGAA      | TGGCTCGAGA   | 3601 |
| <i>Poecilia formosa</i>              | GGCCA  | TGATCACGGGTCAGT  | CCAAGATGAGC  | GCCAGCCTCTCAT  | TGCAGTACTTT    | CAACCTCTC     | ATCACA      | TGGCTGGAGG   | 3607 |
| <i>Poecilia latipinna</i>            | GGCCA  | TGATCACGGGTCAGT  | CCAAGATGAGC  | GCCAGCCTCTCAT  | TGCAGTACTTT    | CAACCTCTC     | ATCACA      | TGGCTGGAGG   | 3607 |
| <i>Pseudopodoces humilis</i>         | GCAGC  | TCATCACAGGGCAGC  | CCAAATGTCA   | GAGAGGCCCTTAT  | TGAGCTACTTT    | TGAGCCACTC    | ATGACG      | TGGCTGGAGA   | 3583 |
| <i>Pundamilia nyererei</i>           | GGCTA  | TGATCACTGGCGAGT  | CCAAAATGAGT  | GCCAGCCACTCAT  | TGGAGTACTTT    | CAACCTCTC     | ATTGAA      | TGGCTTGAGA   | 3601 |
| <i>Pygocentrus nattereri</i>         | GGCTA  | TGATCACTGGCCAGC  | CTGAAATGTCT  | GTGCAGCCTCTCAT | TGGAGTACTTT    | CCAGCCCCTC    | ATCACC      | TGGTTAGAGC   | 3580 |
| <i>Python bivittatus</i>             | GCAAC  | TTATCACAGGACAAT  | CCAAATGTCT   | GCTGAAGCTTT    | TGCTGACCTATTTT | TGAACCACTG    | ACAACT      | TGGCTTATTG   | 3595 |
| <i>Rattus norvegicus</i>             | GAAGAT | AAATCACAGGCCAAC  | CTAACATGTCA  | GCTCTGCCATTAT  | TGAATTACTTT    | CAAGCCACTG    | ACTGAA      | TGGCTCGTCA   | 3646 |
| <i>Scleropages formosus</i>          | GACTA  | TGATCACTGGTCAGC  | CCAAATGTCT   | GCGAGGCATTA    | ATTGAATACTTT   | CCAGCCTCTC    | ATCAAG      | TGGCTGGAGA   | 3586 |
| <i>Sinocyclocheilus anshuiensis</i>  | GACTT  | TGATTACTGGCCAGC  | CCAAAATGTCA  | GCTCAGCCTCTGAT | TGAAATACTTT    | CAACCCGCTC    | ATCGAG      | TGGCTGGTGG   | 3583 |
| <i>Xenopus tropicalis</i>            | GCAACA | ATTACTGTGACAA    | AGGAACATGTCT | GCTCATGCCCTTCT | TCAAAATACTTT   | CCAGCCCCTC    | ATCACC      | TGGCTTATCA   | 3592 |
| <i>Lipotes vexillifer</i>            | GCGGC  | TCATCACAGGCCAGC  | CCAAATGTCT   | GCGCTGCCCTGAT  | TGACCTACTTT    | CAAGCCGCTC    | TGCTGG      | ACTGGCTCGTGA | 3616 |
| <i>Orcinus orca</i>                  | GCGGC  | TCATCACAGGCCAGC  | CCAAATGTCT   | GCGCTGCCCTGAT  | TGACCTACTTT    | CAAGCCGCTC    | TGCTGG      | ACTGGCTCGTGA | 3637 |
| <i>Homo sapiens</i>                  | GCAGC  | TGATCACGGGCCAGC  | CCAAATGAGC   | GCTCCGGCCAT    | GTTTGAGCTACTTT | CAAGCCGCTC    | TGCTGG      | ACTGGCTCCGCA | 3628 |

|                                      | 3610   | 3620         | 3630            | 3640       | 3650         | 3660         | 3670      | 3680                          |      |
|--------------------------------------|--------|--------------|-----------------|------------|--------------|--------------|-----------|-------------------------------|------|
| conservation                         |        |              |                 |            |              |              |           |                               |      |
| <i>Callorhinchus milii</i>           | AGAAG  | AACATCAAGAAT | TGGAGAGACC      | CTGGGA     | TGGCCTGAAT   | ACAATTGG     | ACTCCAG   | CTCTAGGCTCAGACAATCTGCCA       | 3684 |
| <i>Alligator mississippiensis</i>    | ATGTG  | AAACAAGAA    | AATGGGACATT     | CTGGGC     | TGGTCTGATT   | ACAGCTGG     | ACGCCAT   | ATATGCAGCTCGA                 | 3660 |
| <i>Anolis carolinensis</i>           | ACCAGA | AACCTTGAAAG  | AATGGAACAACT    | CTAGGC     | TGGCCTGAAT   | ATACCTTGG    | CTACCC    | TATGCGGGCCAA                  | 3732 |
| <i>Astyanax mexicanus</i>            | AGGAGA | AACGCAAGA    | AATGGAGATGTCT   | CTGGGA     | TGGCCTGAGT   | ATAGCTGG     | ATGCCAA   | ACACAGCTGAGAGTAACTCT          | 3669 |
| <i>Boleophthalmus pectinirostris</i> | AGGAGA | AATGCCAAGA   | AATGGAGATGTT    | CTTGGAT    | TGGCCC       | GAGTACGACT   | TGGAAA    | CCCTACGTGGTGTCAAAACAA         | 3672 |
| <i>Cynoglossus semilaevis</i>        | TAGAGA | AATAACAAGA   | ACAGAGATGTT     | CGTGGGTGGC | CTGACTACGACT | TGGAGACCT    | TGGGAGT   | GAA                           | 3678 |
| <i>Danio rerio</i>                   | AGGAGA | AACGAGA      | AATGGCGAGTGT    | CTGGGA     | TGGCCAGAGT   | ACGACTGG     | ACACCTT   | TACAAACTCAGCACA               | 3783 |
| <i>Esox lucius</i>                   | CAGAGA | AACAACAAGA   | AATGGCGAGGT     | CAGAGGT    | TGGCCTGAGT   | ACGACTGG     | AAAA      | CCGCCAAGTCCCTGGCTCCGTAAACACTT | 3678 |
| <i>Fundulus heteroclitus</i>         | AGGAGA | AACAACAAGA   | AACAGCGAAGTCT   | CGTGGGA    | TGGCCC       | GACTACGACT   | TGGAAA    | CCCTCAGATCCTGGCACTGAAGTC      | 3687 |
| <i>Gekko japonicus</i>               | ATGAGA | AACATGAAAA   | ACGGGGAACCT     | CTGGGC     | TGGCCTGAAT   | ACACCTGG     | ACGCCCT   | TACGCAGGCCAA                  | 3672 |
| <i>Haplochromis burtoni</i>          | AGGAGA | AACAGCAAGA   | ACAATGATGTT     | CGCGGG     | TGGCCAGATT   | ACGACTGG     | AAGCCTTTT | TAGT                          | 3663 |
| <i>Hippocampus comes</i>             | GAGAGA | AACGATAA     | ACGGGGACATCT    | CGCGGG     | TGGCCTGATT   | ACGACTGG     | AAGCCTTT  | TGACGGGT                      | 3657 |
| <i>Ictalurus punctatus</i>           | TGGAGA | AACAAAAA     | AGCGGCAGCTCT    | CGCTGGG    | TGGCCC       | GACTACAACTGG | ATGCGCA   | ACCAGCATGCGAGTT               | 3669 |
| <i>Larimichthys crocea</i>           | CAGAAA | ACAACAAGA    | ACAATGAGGTCT    | CGCGGG     | TGGCCC       | GAATACGACTGG | AAAA      | CCTTTAAGCTCC                  | 3669 |
| <i>Lates calcarifer</i>              | CAGAGA | AACAACAAGA   | ACAACGATATCT    | CGCGGG     | TGGCCTGAGT   | ACAACTGG     | AAACCT    | TAGTATGCCT                    | 3663 |
| <i>Latimeria chalumnae</i>           | AACAGA | AATGAAAAGA   | ATAGAGTGACC     | CTGGGC     | TGGCCC       | GAATACGATTGG | ACTCCA    |                               | 3651 |
| <i>Lepisosteus oculatus</i>          | AGGAGA | AACAAGAAAA   | AATGGGACATTTT   | GGGATGG    | CCC          | GAGTACGACTGG | GTCC      | AGTTTCAGGACCGGAGAAAGGG        | 3663 |
| <i>Macaca fascicularis</i>           | CGGAGA | AATGAGCTGC   | ACGGGGAGAAGCT   | TGGGC      | TGGCCG       | CAGTACAACTGG | ACACCG    | AACTCCGCTCGCTCAGAAAGG         | 3708 |
| <i>Manacus vitellinus</i>            | AGGAGA | AATGAGA      | AAGACGGGGAGGTCT | TGGGC      | TGGCCC       | GAGTACGACTGG | ACTCCT    | GACTCAGCCACTCTGGTC            | 3657 |
| <i>Mus musculus</i>                  | CCGAGA | AACAGGAGAC   | ATGGAGAGACA     | CTGGGC     | TGGCCG       | GAGTACAACTGG | GCGC      | CAAAACACCGCTCGCGCAGAAGGC      | 3720 |
| <i>Neolamprologus brichardi</i>      | AGGAGA | AACAGCAAGA   | ACAATGATGTT     | CGCGGA     | TGGCCAGATT   | ACGACTGG     | AAGCCTTTT | TAGTGAA                       | 3672 |
| <i>Oncorhynchus mykiss</i>           | TAGAGA | AACAACAAGA   | AATGGCGAGGT     | CAGAGGC    | TGGCCAGAAT   | ATGACTGG     | AAAA      | CCCAAGTGACGGCTCAGAAACATCT     | 3678 |
| <i>Oreochromis niloticus</i>         | AGGAGA | AACAGCAAGA   | ACAATGATGTT     | CGCGGA     | TGGCCAGATT   | ACGACTGG     | AAGCCTTTT | TAGTGAA                       | 3672 |
| <i>Poecilia formosa</i>              | AGCAGA | AACAATAAGA   | ACAACGAGGTCT    | CGCGGG     | TGGCCC       | GACTACAACTGG | AGACCTT   | CAGATATAGTTGAAGTTGCA          | 3684 |
| <i>Poecilia latipinna</i>            | AGCAGA | AACAATAAGA   | ACAACGAGGTCT    | CGTGGG     | TGGCCC       | GACTACAACTGG | AGACCTT   | CAGGTATTTTGAAGTTGCA           | 3684 |
| <i>Pseudopodoces humilis</i>         | AAGAGA | AACAAGAAGA   | ACGGGGAGGTCT    | CTGGGC     | TGGCCC       | GAGTACAGCTGG | ACTCCTT   | ACACAGCC                      | 3651 |
| <i>Pundamilia nyererei</i>           | AGGAGA | AACAGCAAGA   | ACAATGATGTT     | CGCGGG     | TGGCCAGATT   | ACGACTGG     | AAGCCTTTT | TAGTGAA                       | 3672 |
| <i>Pygocentrus nattereri</i>         | AGGAAA | ACAAAAAAT    | AATGGCGATATCT   | CTGGGA     | TGGCCTGAAT   | ACAGCTGG     | ATGCGCT   | CACAACCTGAGAGT                | 3651 |
| <i>Python bivittatus</i>             | AAAAGA | AACCTTGCAAA  | ATAATGAAACT     | CTGGGC     | TGGCCTGAAT   | ACACCTGG     | AAGCCAT   | ATATACAGGT                    | 3660 |
| <i>Rattus norvegicus</i>             | CAGAGA | AACAGGAGAC   | ATGGAGAGACA     | CTGGGC     | TGGCCG       | GAGTACACCTGG | ACACCA    | AAACACCGCTCGTGCAGAAGGC        | 3723 |
| <i>Scleropages formosus</i>          | CAGAAA | ACAACAACAAAA | ACAATGATGTCT    | CGTGGC     | TGGCCTGAGT   | ATAACTGG     | AAACCT    | ATCGCTCAAAGCACAGAA            | 3660 |
| <i>Sinocyclocheilus anshuiensis</i>  | AGGAGA | AACAAAAAGA   | AATGGTGATGTCT   | CTGGGA     | TGGCCAGAGT   | ACGATTGG     | ACGCCCTT  | ACAAAATCACTTCA                | 3654 |
| <i>Xenopus tropicalis</i>            | AGGAGA | AATACAAAG    | ATGGCGAAACCTT   | AGGATGG    | CCAGAA       | TACAACTGG    | AGCCAGT   | TACAATCCGTTCTCTGCCA           | 3669 |
| <i>Lipotes vexillifer</i>            | CCGAGA | AACAGCGGC    | ACGGGGAGAAGCT   | TGGGC      | TGGCCTGAGT   | ACAACTGG     | ATGCGC    | CAAACTCAGCTCGCTCGGAAGGC       | 3693 |
| <i>Orcinus orca</i>                  | CCGAGA | AACAGCGGC    | ACGGGGAGAAGCT   | TGGGC      | TGGCCTGAGT   | ACAACTGG     | ATGCGC    | CAAACTCAGCTCGCTCGGAAGGC       | 3714 |
| <i>Homo sapiens</i>                  | CGGAGA | AACGAGCTGC   | ATGGGGAGAAGCT   | TGGGC      | TGGCCG       | CAGTACAACTGG | ACGCCCA   | AACTCCGCTCGCTCAGAAGGG         | 3705 |



| conservation                         | 3690                                                | 3700                                     | 3710                    | 3720         | 3730 | 3740 |      |
|--------------------------------------|-----------------------------------------------------|------------------------------------------|-------------------------|--------------|------|------|------|
| <i>Callorhinchus milii</i>           | ATT.....                                            | CCAACTTCAACACCAGAAGAGGGCGAAAGATAAG       | GTGGATTTTCTGGGATTAAACAT | TGGATCC      |      |      | 3749 |
| <i>Alligator mississippiensis</i>    | .....                                               | .....ACAGAGTCTACAGTCAATTTTCTGGGGATGTCTCT | TGGATCG                 |              |      |      | 3701 |
| <i>Anolis carolinensis</i>           | .....                                               | GTGCAAGCAGACAACAAA                       | GTCAATTTCTTGGGATGTTGAT  | GACCAG       |      |      | 3779 |
| <i>Astyanax mexicanus</i>            | .....                                               | ACTGTAGTGGTAGTGGAGAAGGACAGCCCC           | GTGAACTTTCTGGGTTT       | GAGTGTGGA    | TGA  |      | 3728 |
| <i>Boleophthalmus pectinirostris</i> | .....                                               | .....GAAAAGAGTAAA                        | GTGGACTTCTCGGCATGAATCT  | TGACAG       |      |      | 3713 |
| <i>Cynoglossus semilaevis</i>        | .....                                               | .....GTGGTTGAATCCAATAAA                  | GTGGACTTCTGGGTATGAGTGT  | TGA          | TAA  |      | 3725 |
| <i>Danio rerio</i>                   | .....                                               | GTGGTGGAGGAGTCGCCAAATCT                  | TGAATTTCTGGGGTTGAGTGT   | TGGATGC      |      |      | 3836 |
| <i>Esox lucius</i>                   | CCACTCACCACAGTCCCACATGATACCAGTCCAACAATTCCACCACATGCT | GTGGACTTCTTGGGGATGAAACT                  | TGACCA                  |              |      |      | 3758 |
| <i>Fundulus heteroclitus</i>         | .....                                               | ATT.....GATAGTAAA                        | GTGAGTTCTGGGACTGAAGGT   | TGACCA       |      |      | 3728 |
| <i>Gekko japonicus</i>               | .....                                               | GCGCAAGAGAGCAGCAGA                       | GTCCAGTTCTGGGCATGTCTT   | TGACAG       |      |      | 3719 |
| <i>Haplochromis burtoni</i>          | .....                                               | .....GAAGCTAAAACA                        | GTGGATTTCTGGGTTTAAATGT  | TGAACAG      |      |      | 3704 |
| <i>Hippocampus comes</i>             | .....                                               | .....GGGGTGGAGACCAGCACG                  | GTGGACTTCTGGGAATGAACGT  | TGACAG       |      |      | 3704 |
| <i>Ictalurus punctatus</i>           | .....                                               | GTGGAGGAGGTCAAC...CCTACTACT              | GTGGATTTCTTAGGGTTAAGTGT | TGGATGA      |      |      | 3722 |
| <i>Larimichthys crocea</i>           | .....                                               | CCAATTAAGGATAATAAA                       | GTGGACTTCTTGGCATGAATGT  | TGGATGG      |      |      | 3716 |
| <i>Lates calcarifer</i>              | .....                                               | .....GGTAAAGCTGGTAAA                     | GTGGACTTCTGGGTATGAATGT  | TGACAG       |      |      | 3707 |
| <i>Latimeria chalumnae</i>           | .....                                               | .....CAGACAGCTTCTCCCAACAATAATGGTGACAAA   | GTGGATTTCTTGGCATGACACT  | TAAACAG      |      |      | 3713 |
| <i>Lepisosteus oculatus</i>          | .....                                               | CCAGAGAAAGTGACCGGATCTGCCGAG              | GTGAGCTTCTGGGCATGAACCT  | TGACAG       |      |      | 3719 |
| <i>Macaca fascicularis</i>           | .....                                               | CCCCTCCCAGACAGTGCCCGC                    | GTACAGTTCTGGGCTGGACCT   | TAGATGC      |      |      | 3758 |
| <i>Manacus vitellinus</i>            | .....                                               | .....CCAGATGGCTCCAGCAAACTGAT             | TTCTGGGAATGTCCCT        | TGACCAA      |      |      | 3704 |
| <i>Mus musculus</i>                  | .....                                               | .....TCCACCGCAGAGTCCAACCGC               | GTCAATTTCTGGGCTGTACCT   | TGAGCC       |      |      | 3770 |
| <i>Neolamprologus brichardi</i>      | .....                                               | .....ACAGGTGAAGCTAAAACA                  | GTGGATTTCTGGGTTTAAATGT  | TGAACAG      |      |      | 3719 |
| <i>Oncorhynchus mykiss</i>           | CCCCCAGCCCCAATCCCA.....                             | .....GTTCTAGATAATGGTAAA                  | GTAACTTTCTGGGCATGAGTCT  | TGATGG       |      |      | 3743 |
| <i>Oreochromis niloticus</i>         | .....                                               | ACAGGTGAAGCTAAAAC                        | GTGGATTTCTGGGTTTAAATGT  | TGAACAG      |      |      | 3719 |
| <i>Poecilia formosa</i>              | .....                                               | ACGAAAGATGATGAGAAA                       | GTGAGTTCTGGGACTGAAAGT   | TGACAA       |      |      | 3731 |
| <i>Poecilia latipinna</i>            | .....                                               | ACGAATGATGATGAGAAA                       | GTGAGTTCTGGGACTGAAAGT   | TGACAA       |      |      | 3731 |
| <i>Pseudopodoces humilis</i>         | .....                                               | .....GATGACTCCAGC...AAAAC                | TGATTTCTGGGAATGTTCT     | TGACCAA      |      |      | 3695 |
| <i>Pundamilia nyererei</i>           | .....                                               | .....ACAGGTGAAGCTAAAACA                  | GTGGATTTCTGGGTTTAAATGT  | TGAACAG      |      |      | 3719 |
| <i>Pygocentrus nattereri</i>         | .....                                               | ACTGCAGCGGTGGTGGAG...GACAGCTCA           | GTAGACTTTTGGGCTTGAATAT  | TAGACCA      |      |      | 3707 |
| <i>Python bivittatus</i>             | .....                                               | .....GAATCAGAT                           | GTGAGTTCTTGGGATGTCGCT   | TGAACCG      |      |      | 3698 |
| <i>Rattus norvegicus</i>             | .....                                               | .....TCCCTCCCAGAGTCCAGTCGC               | GTCAACTTCTGGGTATGTACCT  | TGAAACC      |      |      | 3773 |
| <i>Scleropages formosus</i>          | .....                                               | .....GAGAAAAAA                           | GTGGACTTCTTGGATTAAAGTGT | TAGACAG      |      |      | 3698 |
| <i>Sinocyclocheilus anshuiensis</i>  | .....                                               | GTGATGGACGAGAAGCCAAAGCAAT                | CAGTTTCTGGGTTT          | TGAGTGTGATGA |      |      | 3707 |
| <i>Xenopus tropicalis</i>            | .....                                               | .....CCGTCTGGAGATTCTAACCTGACT            | TTCTTGGGACTGGCGGT       | TAGCAA       |      |      | 3716 |
| <i>Lipotes vexillifer</i>            | .....                                               | TCCTTCCCTGGGCTCCGGCCGT                   | GTACAGTTCTTGGGCTGAACCT  | TGAGGA       |      |      | 3743 |
| <i>Orcinus orca</i>                  | .....                                               | TCCTTCCCGGGCTCCGGCCGT                    | GTACAGTTCTTGGGCTGAACCT  | TGAGGA       |      |      | 3764 |
| <i>Homo sapiens</i>                  | .....                                               | CCCCTCCCAGACAGCGGCCGC                    | GTACAGTTCTTGGGCTTGACCT  | TGATGC       |      |      | 3755 |

|              |                                                                                                                                                                                                                                                                                                                                                                                                                                                                                                                                                                                                                                                                                                                                                                                                                                                                                                                                                                                                                                                                                                                                                                                                                                                                                                                                                                                                                                                                                                                                                                                                                                                                                                                                                                                                                                                                                                                                                                                                                                                                                                                                                                                                                                                                                                                                                                                                                                                                                                                                                                                                                                                                                                                                                                                                                                                                                                                                                                                                                                                                                                                                                                                                                                                                                                                                                                                                                                                                                                                                                                                                                                                                                                                                                                                                                                                                                                                                                                                                                                                                                                                                                                                                                                                                                                                                                                                                                                                                                                                                                                                                                                                                                                                                                                                                                                                                                                                                                                                                                                                                                                                                                                                                                                                                                                                                                                                                                                                                                                                                                                                                                                                                                                                                                                                                                                                                                                                                                                                                                                                                                                                                                                                                                                                                                                                                                                                                                                                                                                                                                                                                                                                                                                                                                                                                                                                                                                                                                                                                                                                                                                                                                                                                                                                                                                                                                                                                                                                                                                                                                                                                                                                                                                                                                                                                                                                                                                                                                                                                                                                                                                                                                                                                                                                                                                                                                                                                                                                                                                                                                                                                                                                                                                                                                                                                                                                                                                                                                                                                                                                                                                                                                                                                                                                                                                                                                                                                                                                                                                                                                                                                                                                                                                                                                                                                                                                                                                                                                                                                                                                                                                                                                                                                                                                                                                                                                                                                                                                                                                                                                                                                                                                                                                                                                                                                                                                                                                                                                                                                                                                                                                                                                                                                                                                                                                                                                                                                                                                                                                                                                                                                                                                                                                                                                                                                                                                                                                                                                                                                                                                                                                                                                                                                                                                                                                                                                                                                                                                                                                                                                                                                                                                                                                                                                                                                                                                                                                                                                                                                                                                                                                                                                                                                                                                                                                                                                                                                                                                                                                                                                                                                                                                                                                                                                                                                                                                                                                                                                                                                                                                                                                                                                                                                                                                                                                                                                                                                                                                                                                                                                                                                                                                                                                                                                                                                                                                                                                                                                                                                                                                                                                                                                                                                                                                                                                                                                                                                                                                                                                                                                                                                                                                                                                                                                                                                                                                                                                                                                                                                                                                                                                                                                                                                                                                                                                                                                                                                                                                                                                                                                                                                                                                                                                                                                                                                                                                                                                                                                                                                                                                                                                                                                                                                                                                                                                                                                                                                                                                                                                                                                                                                                                                                                                                                                                                                                                                                                                                                                                                                                                                                                                                                                                                                                                                                                                                                                                                                                                                                                                                                                                                                                                                                 |
|--------------|-----------------------------------------------------------------------------------------------------------------------------------------------------------------------------------------------------------------------------------------------------------------------------------------------------------------------------------------------------------------------------------------------------------------------------------------------------------------------------------------------------------------------------------------------------------------------------------------------------------------------------------------------------------------------------------------------------------------------------------------------------------------------------------------------------------------------------------------------------------------------------------------------------------------------------------------------------------------------------------------------------------------------------------------------------------------------------------------------------------------------------------------------------------------------------------------------------------------------------------------------------------------------------------------------------------------------------------------------------------------------------------------------------------------------------------------------------------------------------------------------------------------------------------------------------------------------------------------------------------------------------------------------------------------------------------------------------------------------------------------------------------------------------------------------------------------------------------------------------------------------------------------------------------------------------------------------------------------------------------------------------------------------------------------------------------------------------------------------------------------------------------------------------------------------------------------------------------------------------------------------------------------------------------------------------------------------------------------------------------------------------------------------------------------------------------------------------------------------------------------------------------------------------------------------------------------------------------------------------------------------------------------------------------------------------------------------------------------------------------------------------------------------------------------------------------------------------------------------------------------------------------------------------------------------------------------------------------------------------------------------------------------------------------------------------------------------------------------------------------------------------------------------------------------------------------------------------------------------------------------------------------------------------------------------------------------------------------------------------------------------------------------------------------------------------------------------------------------------------------------------------------------------------------------------------------------------------------------------------------------------------------------------------------------------------------------------------------------------------------------------------------------------------------------------------------------------------------------------------------------------------------------------------------------------------------------------------------------------------------------------------------------------------------------------------------------------------------------------------------------------------------------------------------------------------------------------------------------------------------------------------------------------------------------------------------------------------------------------------------------------------------------------------------------------------------------------------------------------------------------------------------------------------------------------------------------------------------------------------------------------------------------------------------------------------------------------------------------------------------------------------------------------------------------------------------------------------------------------------------------------------------------------------------------------------------------------------------------------------------------------------------------------------------------------------------------------------------------------------------------------------------------------------------------------------------------------------------------------------------------------------------------------------------------------------------------------------------------------------------------------------------------------------------------------------------------------------------------------------------------------------------------------------------------------------------------------------------------------------------------------------------------------------------------------------------------------------------------------------------------------------------------------------------------------------------------------------------------------------------------------------------------------------------------------------------------------------------------------------------------------------------------------------------------------------------------------------------------------------------------------------------------------------------------------------------------------------------------------------------------------------------------------------------------------------------------------------------------------------------------------------------------------------------------------------------------------------------------------------------------------------------------------------------------------------------------------------------------------------------------------------------------------------------------------------------------------------------------------------------------------------------------------------------------------------------------------------------------------------------------------------------------------------------------------------------------------------------------------------------------------------------------------------------------------------------------------------------------------------------------------------------------------------------------------------------------------------------------------------------------------------------------------------------------------------------------------------------------------------------------------------------------------------------------------------------------------------------------------------------------------------------------------------------------------------------------------------------------------------------------------------------------------------------------------------------------------------------------------------------------------------------------------------------------------------------------------------------------------------------------------------------------------------------------------------------------------------------------------------------------------------------------------------------------------------------------------------------------------------------------------------------------------------------------------------------------------------------------------------------------------------------------------------------------------------------------------------------------------------------------------------------------------------------------------------------------------------------------------------------------------------------------------------------------------------------------------------------------------------------------------------------------------------------------------------------------------------------------------------------------------------------------------------------------------------------------------------------------------------------------------------------------------------------------------------------------------------------------------------------------------------------------------------------------------------------------------------------------------------------------------------------------------------------------------------------------------------------------------------------------------------------------------------------------------------------------------------------------------------------------------------------------------------------------------------------------------------------------------------------------------------------------------------------------------------------------------------------------------------------------------------------------------------------------------------------------------------------------------------------------------------------------------------------------------------------------------------------------------------------------------------------------------------------------------------------------------------------------------------------------------------------------------------------------------------------------------------------------------------------------------------------------------------------------------------------------------------------------------------------------------------------------------------------------------------------------------------------------------------------------------------------------------------------------------------------------------------------------------------------------------------------------------------------------------------------------------------------------------------------------------------------------------------------------------------------------------------------------------------------------------------------------------------------------------------------------------------------------------------------------------------------------------------------------------------------------------------------------------------------------------------------------------------------------------------------------------------------------------------------------------------------------------------------------------------------------------------------------------------------------------------------------------------------------------------------------------------------------------------------------------------------------------------------------------------------------------------------------------------------------------------------------------------------------------------------------------------------------------------------------------------------------------------------------------------------------------------------------------------------------------------------------------------------------------------------------------------------------------------------------------------------------------------------------------------------------------------------------------------------------------------------------------------------------------------------------------------------------------------------------------------------------------------------------------------------------------------------------------------------------------------------------------------------------------------------------------------------------------------------------------------------------------------------------------------------------------------------------------------------------------------------------------------------------------------------------------------------------------------------------------------------------------------------------------------------------------------------------------------------------------------------------------------------------------------------------------------------------------------------------------------------------------------------------------------------------------------------------------------------------------------------------------------------------------------------------------------------------------------------------------------------------------------------------------------------------------------------------------------------------------------------------------------------------------------------------------------------------------------------------------------------------------------------------------------------------------------------------------------------------------------------------------------------------------------------------------------------------------------------------------------------------------------------------------------------------------------------------------------------------------------------------------------------------------------------------------------------------------------------------------------------------------------------------------------------------------------------------------------------------------------------------------------------------------------------------------------------------------------------------------------------------------------------------------------------------------------------------------------------------------------------------------------------------------------------------------------------------------------------------------------------------------------------------------------------------------------------------------------------------------------------------------------------------------------------------------------------------------------------------------------------------------------------------------------------------------------------------------------------------------------------------------------------------------------------------------------------------------------------------------------------------------------------------------------------------------------------------------------------------------------------------------------------------------------------------------------------------------------------------------------------------------------------------------------------------------------------------------------------------------------------------------------------------------------------------------------------------------------------------------------------------------------------------------------------------------------------------------------------------------------------------------------------------------------------------------------------------------------------------------------------------------------------------------------------------------------------------------------------------------------------------------------------------------------------------------------------------------------------------------------------------------------------------------------------------------------------------------------------------------------------------------------------------------------------------------------------------------------------------------------------------------------------------------------------------------------------------------------------------------------------------------------------------------------------------------------------------------------------------------------------------------------------------------------------------------------------------------------------------------------------------------------------------------------------------------------------------------------------------------------------------------------------------------------------------------------------------------------------------------------------------------------------------------------------------------------------------------------------------------------------------------------------------------------------------------------------------------------------------------------------------------------------------------------------------------------------------------------------------------------------------------------------------------------------------------------------------------------------------------------------------------------------------------------------------------------------------------------------------------------------------------------------------------------------------------------------------------------------------------------------------------------------------------------------------------------------------------------------------------------------------------------------------------------------------------------------------------------------------------------------------------------------------------------------------------------------------------------------------------------------------------------------------------------------------------------------------------------------------------------------------------------------------------------------------------------------------------------------------------------------------------------------------------------------------------------------------------------------------------------------------------------------------------------------------------------------------------------------------------------------------------------------------------------------------------------------------------------------------------------------------------------------------------------------------------------------------------------------------------------------------------------------------|
| conservation | <div><div></div><div></div><div></div><div></div><div></div><div></div><div></div><div></div><div></div><div></div><div></div><div></div><div></div><div></div><div></div><div></div><div></div><div></div><div></div><div></div><div></div><div></div><div></div><div></div><div></div><div></div><div></div><div></div><div></div><div></div><div></div><div></div><div></div><div></div><div></div><div></div><div></div><div></div><div></div><div></div><div></div><div></div><div></div><div></div><div></div><div></div><div></div><div></div><div></div><div></div><div></div><div></div><div></div><div></div><div></div><div></div><div></div><div></div><div></div><div></div><div></div><div></div><div></div><div></div><div></div><div></div><div></div><div></div><div></div><div></div><div></div><div></div><div></div><div></div><div></div><div></div><div></div><div></div><div></div><div></div><div></div><div></div><div></div><div></div><div></div><div></div><div></div><div></div><div></div><div></div><div></div><div></div><div></div><div></div><div></div><div></div><div></div><div></div><div></div><div></div><div></div><div></div><div></div><div></div><div></div><div></div><div></div><div></div><div></div><div></div><div></div><div></div><div></div><div></div><div></div><div></div><div></div><div></div><div></div><div></div><div></div><div></div><div></div><div></div><div></div><div></div><div></div><div></div><div></div><div></div><div></div><div></div><div></div><div></div><div></div><div></div><div></div><div></div><div></div><div></div><div></div><div></div><div></div><div></div><div></div><div></div><div></div><div></div><div></div><div></div><div></div><div></div><div></div><div></div><div></div><div></div><div></div><div></div><div></div><div></div><div></div><div></div><div></div><div></div><div></div><div></div><div></div><div></div><div></div><div></div><div></div><div></div><div></div><div></div><div></div><div></div><div></div><div></div><div></div><div></div><div></div><div></div><div></div><div></div><div></div><div></div><div></div><div></div><div></div><div></div><div></div><div></div><div></div><div></div><div></div><div></div><div></div><div></div><div></div><div></div><div></div><div></div><div></div><div></div><div></div><div></div><div></div><div></div><div></div><div></div><div></div><div></div><div></div><div></div><div></div><div></div><div></div><div></div><div></div><div></div><div></div><div></div><div></div><div></div><div></div><div></div><div></div><div></div><div></div><div></div><div></div><div></div><div></div><div></div><div></div><div></div><div></div><div></div><div></div><div></div><div></div><div></div><div></div><div></div><div></div><div></div><div></div><div></div><div></div><div></div><div></div><div></div><div></div><div></div><div></div><div></div><div></div><div></div><div></div><div></div><div></div><div></div><div></div><div></div><div></div><div></div><div></div><div></div><div></div><div></div><div></div><div></div><div></div><div></div><div></div><div></div><div></div><div></div><div></div><div></div><div></div><div></div><div></div><div></div><div></div><div></div><div></div><div></div><div></div><div></div><div></div><div></div><div></div><div></div><div></div><div></div><div></div><div></div><div></div><div></div><div></div><div></div><div></div><div></div><div></div><div></div><div></div><div></div><div></div><div></div><div></div><div></div><div></div><div></div><div></div><div></div><div></div><div></div><div></div><div></div><div></div><div></div><div></div><div></div><div></div><div></div><div></div><div></div><div></div><div></div><div></div><div></div><div></div><div></div><div></div><div></div><div></div><div></div><div></div><div></div><div></div><div></div><div></div><div></div><div></div><div></div><div></div><div></div><div></div><div></div><div></div><div></div><div></div><div></div><div></div><div></div><div></div><div></div><div></div><div></div><div></div><div></div><div></div><div></div><div></div><div></div><div></div><div></div><div></div><div></div><div></div><div></div><div></div><div></div><div></div><div></div><div></div><div></div><div></div><div></div><div></div><div></div><div></div><div></div><div></div><div></div><div></div><div></div><div></div><div></div><div></div><div></div><div></div><div></div><div></div><div></div><div></div><div></div><div></div><div></div><div></div><div></div><div></div><div></div><div></div><div></div><div></div><div></div><div></div><div></div><div></div><div></div><div></div><div></div><div></div><div></div><div></div><div></div><div></div><div></div><div></div><div></div><div></div><div></div><div></div><div></div><div></div><div></div><div></div><div></div><div></div><div></div><div></div><div></div><div></div><div></div><div></div><div></div><div></div><div></div><div></div><div></div><div></div><div></div><div></div><div></div><div></div><div></div><div></div><div></div><div></div><div></div><div></div><div></div><div></div><div></div><div></div><div></div><div></div><div></div><div></div><div></div><div></div><div></div><div></div><div></div><div></div><div></div><div></div><div></div><div></div><div></div><div></div><div></div><div></div><div></div><div></div><div></div><div></div><div></div><div></div><div></div><div></div><div></div><div></div><div></div><div></div><div></div><div></div><div></div><div></div><div></div><div></div><div></div><div></div><div></div><div></div><div></div><div></div><div></div><div></div><div></div><div></div><div></div><div></div><div></div><div></div><div></div><div></div><div></div><div></div><div></div><div></div><div></div><div></div><div></div><div></div><div></div><div></div><div></div><div></div><div></div><div></div><div></div><div></div><div></div><div></div><div></div><div></div><div></div><div></div><div></div><div></div><div></div><div></div><div></div><div></div><div></div><div></div><div></div><div></div><div></div><div></div><div></div><div></div><div></div><div></div><div></div><div></div><div></div><div></div><div></div><div></div><div></div><div></div><div></div><div></div><div></div><div></div><div></div><div></div><div></div><div></div><div></div><div></div><div></div><div></div><div></div><div></div><div></div><div></div><div></div><div></div><div></div><div></div><div></div><div></div><div></div><div></div><div></div><div></div><div></div><div></div><div></div><div></div><div></div><div></div><div></div><div></div><div></div><div></div><div></div><div></div><div></div><div></div><div></div><div></div><div></div><div></div><div></div><div></div><div></div><div></div><div></div><div></div><div></div><div></div><div></div><div></div><div></div><div></div><div></div><div></div><div></div><div></div><div></div><div></div><div></div><div></div><div></div><div></div><div></div><div></div><div></div><div></div><div></div><div></div><div></div><div></div><div></div><div></div><div></div><div></div><div></div><div></div><div></div><div></div><div></div><div></div><div></div><div></div><div></div><div></div><div></div><div></div><div></div><div></div><div></div><div></div><div></div><div></div><div></div><div></div><div></div><div></div><div></div><div></div><div></div><div></div><div></div><div></div><div></div><div></div><div></div><div></div><div></div><div></div><div></div><div></div><div></div><div></div><div></div><div></div><div></div><div></div><div></div><div></div><div></div><div></div><div></div><div></div><div></div><div></div><div></div><div></div><div></div><div></div><div></div><div></div><div></div><div></div><div></div><div></div><div></div><div></div><div></div><div></div><div></div><div></div><div></div><div></div><div></div><div></div><div></div><div></div><div></div><div></div><div></div><div></div><div></div><div></div><div></div><div></div><div></div><div></div><div></div><div></div><div></div><div></div><div></div><div></div><div></div><div></div><div></div><div></div><div></div><div></div><div></div><div></div><div></div><div></div><div></div><div></div><div></div><div></div><div></div><div></div><div></div><div></div><div></div><div></div><div></div><div></div><div></div><div></div><div></div><div></div><div></div><div></div><div></div><div></div><div></div><div></div><div></div><div></div><div></div><div></div><div></div><div></div><div></div><div></div><div></div><div></div><div></div><div></div><div></div><div></div><div></div><div></div><div></div><div></div><div></div><div></div><div></div><div></div><div></div><div></div><div></div><div></div><div></div><div></div><div></div><div></div><div></div><div></div><div></div><div></div><div></div><div></div><div></div><div></div><div></div><div></div><div></div><div></div><div></div><div></div><div></div><div></div><div></div><div></div><div></div><div></div><div></div><div></div><div></div><div></div><div></div><div></div><div></div><div></div><div></div><div></div><div></div><div></div><div></div><div></div><div></div><div></div><div></div><div></div><div></div><div></div><div></div><div></div><div></div><div></div><div></div><div></div><div></div><div></div><div></div><div></div><div></div><div></div><div></div><div></div><div></div><div></div><div></div><div></div><div></div><div></div><div></div><div></div><div></div><div></div><div></div><div></div><div></div><div></div><div></div><div></div><div></div><div></div><div></div><div></div><div></div><div></div><div></div><div></div><div></div><div></div><div></div><div></div><div></div><div></div><div></div><div></div><div></div><div></div><div></div><div></div><div></div><div></div><div></div><div></div><div></div><div></div><div></div><div></div><div></div><div></div><div></div><div></div><div></div><div></div><div></div><div></div><div></div><div></div><div></div><div></div><div></div><div></div><div></div><div></div><div></div><div></div><div></div><div></div><div></div><div></div><div></div><div></div><div></div><div></div><div></div><div></div><div></div><div></div><div></div><div></div><div></div><div></div><div></div><div></div><div></div><div></div><div></div><div></div><div></div><div></div><div></div><div></div><div></div><div></div><div></div><div></div><div></div><div></div><div></div><div></div><div></div><div></div><div></div><div></div><div></div><div></div><div></div><div></div><div></div><div></div><div></div><div></div><div></div><div></div><div></div><div></div><div></div><div></div><div></div><div></div><div></div><div></div><div></div><div></div><div></div><div></div><div></div><div></div><div></div><div></div><div></div><div></div><div></div><div></div><div></div><div></div><div></div><div></div><div></div><div></div><div></div><div></div><div></div><div></div><div></div><div></div><div></div><div></div><div></div><div></div><div></div><div></div><div></div><div></div><div></div><div></div><div></div><div></div><div></div><div></div><div></div><div></div><div></div><div></div><div></div><div></div><div></div><div></div><div></div><div></div><div></div><div></div><div></div><div></div><div></div><div></div><div></div><div></div><div></div><div></div><div></div><div></div><div></div><div></div><div></div><div></div><div></div><div></div><div></div><div></div><div></div><div></div><div></div><div></div><div></div><div></div><div></div><div></div><div></div><div></div><div></div><div></div><div></div><div></div><div></div><div></div><div></div><div></div><div></div><div></div><div></div><div></div><div></div><div></div><div></div><div></div><div></div><div></div><div></div><div></div><div></div><div></div><div></div><div></div><div></div><div></div><div></div><div></div><div></div><div></div><div></div><div></div><div></div><div></div><div></div><div></div><div></div><div></div><div></div><div></div><div></div><div></div><div></div><div></div><div></div><div></div><div></div><div></div><div></div><div></div><div></div><div></div><div></div><div></div><div></div><div></div><div></div><div></div><div></div><div></div><div></div><div></div><div></div><div></div><div></div><div></div><div></div><div></div><div></div><div></div><div></div><div></div><div></div><div></div><div></div><div></div><div></div><div></div><div></div><div></div><div></div><div></div><div></div><div></div><div></div><div></div><div></div><div></div><div></div><div></div><div></div><div></div><div></div><div></div><div></div><div></div><div></div><div></div><div></div><div></div><div></div><div></div><div></div><div></div><div></div><div></div><div></div><div></div><div></div><div></div><div></div><div></div><div></div><div></div><div></div><div></div><div></div><div></div><div></div><div></div><div></div><div></div><div></div><div></div><div></div><div></div><div></div><div></div><div></div><div></div><div></div><div></div><div></div><div></div><div></div><div></div><div></div><div></div><div></div><div></div><div></div><div></div><div></div><div></div><div></div><div></div><div></div><div></div><div></div><div></div><div></div><div></div><div></div><div></div><div></div><div></div><div></div><div></div><div></div><div></div><div></div><div></div><div></div><div></div><div></div><div></div><div></div><div></div><div></div><div></div><div></div><div></div><div></div><div></div><div></div><div></div><div></div><div></div><div></div><div></div><div></div><div></div><div></div><div></div><div></div><div></div><div></div><div></div><div></div><div></div><div></div><div></div><div></div><div></div><div></div><div></div><div></div><div></div><div></div><div></div><div></div><div></div><div></div><div></div><div></div><div></div><div></div><div></div><div></div><div></div><div></div><div></div><div></div><div></div><div></div><div></div><div></div><div></div><div></div><div></div><div></div><div></div><div></div><div></div><div></div><div></div><div></div><div></div><div></div><div></div><div></div><div></div><div></div><div></div><div></div><div></div><div></div><div></div><div></div><div></div><div></div><div></div><div></div><div></div><div></div><div></div><div></div><div></div><div></div><div></div><div></div><div></div><div></div><div></div><div></div><div></div><div></div><div></div><div></div><div></div><div></div><div></div><div></div><div></div><div></div><div></div><div></div><div></div><div></div><div></div><div></div><div></div><div></div><div></div><div></div><div></div><div></div><div></div><div></div><div></div><div></div><div></div><div></div><div></div><div></div><div></div><div></div><div></div><div></div><div></div><div></div><div></div><div></div><div></div><div></div><div></div><div></div><div></div><div></div><div></div><div></div><div></div><div></div><div></div><div></div><div></div><div></div><div></div><div></div><div></div><div></div><div></div><div></div><div></div><div></div><div></div><div></div><div></div><div></div><div></div><div></div><div></div><div></div><div></div><div></div><div></div><div></div><div></div><div></div><div></div><div></div><div></div><div></div><div></div><div></div><div></div><div></div><div></div><div></div><div></div><div></div><div></div><div></div><div></div><div></div><div></div><div></div><div></div><div></div><div></div><div></div><div></div><div></div><div></div><div></div><div></div><div></div><div></div><div></div><div></div><div></div><div></div><div></div><div></div><div></div><div></div><div></div><div></div><div></div><div></div><div></div><div></div><div></div><div></div><div></div><div></div><div></div><div></div><div></div><div></div><div></div><div></div><div></div><div></div><div></div><div></div><div></div><div></div><div></div><div></div><div></div><div></div><div></div><div></div><div></div><div></div><div></div><div></div><div></div><div></div><div></div><div></div><div></div><div></div><div></div><div></div><div></div><div></div><div></div><div></div><div></div><div></div><div></div><div></div><div></div><div></div><div></div><div></div><div></div><div></div><div></div><div></div><div></div><div></div><div></div><div></div><div></div><div></div><div></div><div></div><div></div><div></div><div></div><div></div><div></div><div></div><div></div><div></div><div></div><div></div><div></div><div></div><div></div><div></div><div></div><div></div><div></div><div></div><div></div><div></div><div></div><div></div><div></div><div></div><div></div><div></div><div></div><div></div><div></div><div></div><div></div><div></div><div></div><div></div><div></div><div></div><div></div><div></div><div></div><div></div><div></div><div></div><div></div><div></div><div></div><div></div><div></div><div></div><div></div><div></div><div></div><div></div><div></div><div></div><div></div><div></div><div></div><div></div><div></div><div></div><div></div><div></div><div></div><div></div><div></div><div></div><div></div><div></div><div></div><div></div><div></div><div></div><div></div><div></div><div></div><div></div><div></div><div></div><div></div><div></div><div></div><div></div><div></div><div></div><div></div><div></div><div></div><div></div><div></div><div></div><div></div><div></div><div></div><div></div><div></div><div></div><div></div><div></div><div></div><div></div><div></div><div></div><div></div><div></div><div></div><div></div><div></div><div></div><div></div><div></div><div></div><div></div><div></div><div></div><div></div><div></div><div></div><div></div><div></div><div></div><div></div><div></div><div></div><div></div><div></div><div></div><div></div><div></div><div></div><div></div><div></div><div></div><div></div><div></div><div></div><div></div><div></div><div></div><div></div><div></div><div></div><div></div><div></div><div></div><div></div><div></div><div></div><div></div><div></div><div></div><div></div><div></div><div></div><div></div><div></div><div></div><div></div><div></div><div></div><div></div><div></div><div></div><div></div><div></div><div></div></div> |
|--------------|-----------------------------------------------------------------------------------------------------------------------------------------------------------------------------------------------------------------------------------------------------------------------------------------------------------------------------------------------------------------------------------------------------------------------------------------------------------------------------------------------------------------------------------------------------------------------------------------------------------------------------------------------------------------------------------------------------------------------------------------------------------------------------------------------------------------------------------------------------------------------------------------------------------------------------------------------------------------------------------------------------------------------------------------------------------------------------------------------------------------------------------------------------------------------------------------------------------------------------------------------------------------------------------------------------------------------------------------------------------------------------------------------------------------------------------------------------------------------------------------------------------------------------------------------------------------------------------------------------------------------------------------------------------------------------------------------------------------------------------------------------------------------------------------------------------------------------------------------------------------------------------------------------------------------------------------------------------------------------------------------------------------------------------------------------------------------------------------------------------------------------------------------------------------------------------------------------------------------------------------------------------------------------------------------------------------------------------------------------------------------------------------------------------------------------------------------------------------------------------------------------------------------------------------------------------------------------------------------------------------------------------------------------------------------------------------------------------------------------------------------------------------------------------------------------------------------------------------------------------------------------------------------------------------------------------------------------------------------------------------------------------------------------------------------------------------------------------------------------------------------------------------------------------------------------------------------------------------------------------------------------------------------------------------------------------------------------------------------------------------------------------------------------------------------------------------------------------------------------------------------------------------------------------------------------------------------------------------------------------------------------------------------------------------------------------------------------------------------------------------------------------------------------------------------------------------------------------------------------------------------------------------------------------------------------------------------------------------------------------------------------------------------------------------------------------------------------------------------------------------------------------------------------------------------------------------------------------------------------------------------------------------------------------------------------------------------------------------------------------------------------------------------------------------------------------------------------------------------------------------------------------------------------------------------------------------------------------------------------------------------------------------------------------------------------------------------------------------------------------------------------------------------------------------------------------------------------------------------------------------------------------------------------------------------------------------------------------------------------------------------------------------------------------------------------------------------------------------------------------------------------------------------------------------------------------------------------------------------------------------------------------------------------------------------------------------------------------------------------------------------------------------------------------------------------------------------------------------------------------------------------------------------------------------------------------------------------------------------------------------------------------------------------------------------------------------------------------------------------------------------------------------------------------------------------------------------------------------------------------------------------------------------------------------------------------------------------------------------------------------------------------------------------------------------------------------------------------------------------------------------------------------------------------------------------------------------------------------------------------------------------------------------------------------------------------------------------------------------------------------------------------------------------------------------------------------------------------------------------------------------------------------------------------------------------------------------------------------------------------------------------------------------------------------------------------------------------------------------------------------------------------------------------------------------------------------------------------------------------------------------------------------------------------------------------------------------------------------------------------------------------------------------------------------------------------------------------------------------------------------------------------------------------------------------------------------------------------------------------------------------------------------------------------------------------------------------------------------------------------------------------------------------------------------------------------------------------------------------------------------------------------------------------------------------------------------------------------------------------------------------------------------------------------------------------------------------------------------------------------------------------------------------------------------------------------------------------------------------------------------------------------------------------------------------------------------------------------------------------------------------------------------------------------------------------------------------------------------------------------------------------------------------------------------------------------------------------------------------------------------------------------------------------------------------------------------------------------------------------------------------------------------------------------------------------------------------------------------------------------------------------------------------------------------------------------------------------------------------------------------------------------------------------------------------------------------------------------------------------------------------------------------------------------------------------------------------------------------------------------------------------------------------------------------------------------------------------------------------------------------------------------------------------------------------------------------------------------------------------------------------------------------------------------------------------------------------------------------------------------------------------------------------------------------------------------------------------------------------------------------------------------------------------------------------------------------------------------------------------------------------------------------------------------------------------------------------------------------------------------------------------------------------------------------------------------------------------------------------------------------------------------------------------------------------------------------------------------------------------------------------------------------------------------------------------------------------------------------------------------------------------------------------------------------------------------------------------------------------------------------------------------------------------------------------------------------------------------------------------------------------------------------------------------------------------------------------------------------------------------------------------------------------------------------------------------------------------------------------------------------------------------------------------------------------------------------------------------------------------------------------------------------------------------------------------------------------------------------------------------------------------------------------------------------------------------------------------------------------------------------------------------------------------------------------------------------------------------------------------------------------------------------------------------------------------------------------------------------------------------------------------------------------------------------------------------------------------------------------------------------------------------------------------------------------------------------------------------------------------------------------------------------------------------------------------------------------------------------------------------------------------------------------------------------------------------------------------------------------------------------------------------------------------------------------------------------------------------------------------------------------------------------------------------------------------------------------------------------------------------------------------------------------------------------------------------------------------------------------------------------------------------------------------------------------------------------------------------------------------------------------------------------------------------------------------------------------------------------------------------------------------------------------------------------------------------------------------------------------------------------------------------------------------------------------------------------------------------------------------------------------------------------------------------------------------------------------------------------------------------------------------------------------------------------------------------------------------------------------------------------------------------------------------------------------------------------------------------------------------------------------------------------------------------------------------------------------------------------------------------------------------------------------------------------------------------------------------------------------------------------------------------------------------------------------------------------------------------------------------------------------------------------------------------------------------------------------------------------------------------------------------------------------------------------------------------------------------------------------------------------------------------------------------------------------------------------------------------------------------------------------------------------------------------------------------------------------------------------------------------------------------------------------------------------------------------------------------------------------------------------------------------------------------------------------------------------------------------------------------------------------------------------------------------------------------------------------------------------------------------------------------------------------------------------------------------------------------------------------------------------------------------------------------------------------------------------------------------------------------------------------------------------------------------------------------------------------------------------------------------------------------------------------------------------------------------------------------------------------------------------------------------------------------------------------------------------------------------------------------------------------------------------------------------------------------------------------------------------------------------------------------------------------------------------------------------------------------------------------------------------------------------------------------------------------------------------------------------------------------------------------------------------------------------------------------------------------------------------------------------------------------------------------------------------------------------------------------------------------------------------------------------------------------------------------------------------------------------------------------------------------------------------------------------------------------------------------------------------------------------------------------------------------------------------------------------------------------------------------------------------------------------------------------------------------------------------------------------------------------------------------------------------------------------------------------------------------------------------------------------------------------------------------------------------------------------------------------------------------------------------------------------------------------------------------------------------------------------------------------------------------------------------------------------------------------------------------------------------------------------------------------------------------------------------------------------------------------------------------------------------------------------------------------------------------------------------------------------------------------------------------------------------------------------------------------------------------------------------------------------------------------------------------------------------------------------------------------------------------------------------------------------------------------------------------------------------------------------------------------------------------------------------------------------------------------------------------------------------------------------------------------------------------------------------------------------------------------------------------------------------------------------------------------------------------------------------------------------------------------------------------------------------------------------------------------------------------------------------------------------------------------------------------------------------------------------------------------------------------------------------------------------------------------------------------------------------------------------------------------------------------------------------------------------------------------------------------------------------------------------------------------------------------------------------------------------------------------------------------------------------------------------------------------------------------------------------------------------------------------------------------------------------------------------------------------------------------------------------------------------------------------------------------------------------------------------------------------------------------------------------------------------------------------------------------------------------------------------------------------------------------------------------------------------------------------------------------------------------------------------------------------------------------------------------|

| conservation                         |     |      |
|--------------------------------------|-----|------|
| <i>Callorhinchus milii</i>           | TAA | 3888 |
| <i>Alligator mississippiensis</i>    | TAA | 3840 |
| <i>Anolis carolinensis</i>           | TAA | 3918 |
| <i>Astyanax mexicanus</i>            | TAA | 3867 |
| <i>Boleophthalmus pectinirostris</i> | TCC | 3849 |
| <i>Cynoglossus semilaevis</i>        | TAA | 3861 |
| <i>Danio rerio</i>                   | TAA | 3975 |
| <i>Esox lucius</i>                   | TAA | 3894 |
| <i>Fundulus heteroclitus</i>         | CAA | 3861 |
| <i>Gekko japonicus</i>               | TAG | 3858 |
| <i>Haplochromis burtoni</i>          | CAA | 3840 |
| <i>Hippocampus comes</i>             | CAA | 3840 |
| <i>Ictalurus punctatus</i>           | TAG | 3861 |
| <i>Larimichthys crocea</i>           | TAA | 3852 |
| <i>Lates calcarifer</i>              | CAA | 3843 |
| <i>Latimeria chalumnae</i>           | TAA | 3852 |
| <i>Lepisosteus oculatus</i>          | TAG | 3852 |
| <i>Macaca fascicularis</i>           | CAC | 3918 |
| <i>Manacus vitellinus</i>            | TGA | 3843 |
| <i>Mus musculus</i>                  | CAC | 3933 |
| <i>Neolamprologus brichardi</i>      | CAA | 3855 |
| <i>Oncorhynchus mykiss</i>           | TAA | 3879 |
| <i>Oreochromis niloticus</i>         | CAA | 3855 |
| <i>Poecilia formosa</i>              | TAA | 3867 |
| <i>Poecilia latipinna</i>            | TAA | 3867 |
| <i>Pseudopodoces humilis</i>         | TAA | 3834 |
| <i>Pundamilia nyererei</i>           | CAA | 3855 |
| <i>Pygocentrus nattereri</i>         | TAG | 3846 |
| <i>Python bivittatus</i>             | TGA | 3837 |
| <i>Rattus norvegicus</i>             | CAC | 3936 |
| <i>Scleropages formosus</i>          | TCC | 3834 |
| <i>Sinocyclocheilus anshuiensis</i>  | TAA | 3846 |
| <i>Xenopus tropicalis</i>            | TAG | 3855 |
| <i>Lipotes vexillifer</i>            | CAC | 3903 |
| <i>Orcinus orca</i>                  | CAC | 3924 |
| <i>Homo sapiens</i>                  | CAC | 3915 |



 non conserved  
  $\geq 60\%$  conserved  
  $\geq 85\%$  conserved
