# Supplementary figures and images for: A Genomic Survey of Angiotensin-Converting Enzymes Provides Novel Insights into Their Molecular Evolution in Vertebrates
Source: MDPI journal article supplement (doi:10.3390/molecules23112923), 2018-11-09

(a) Block 1 compares Block 3

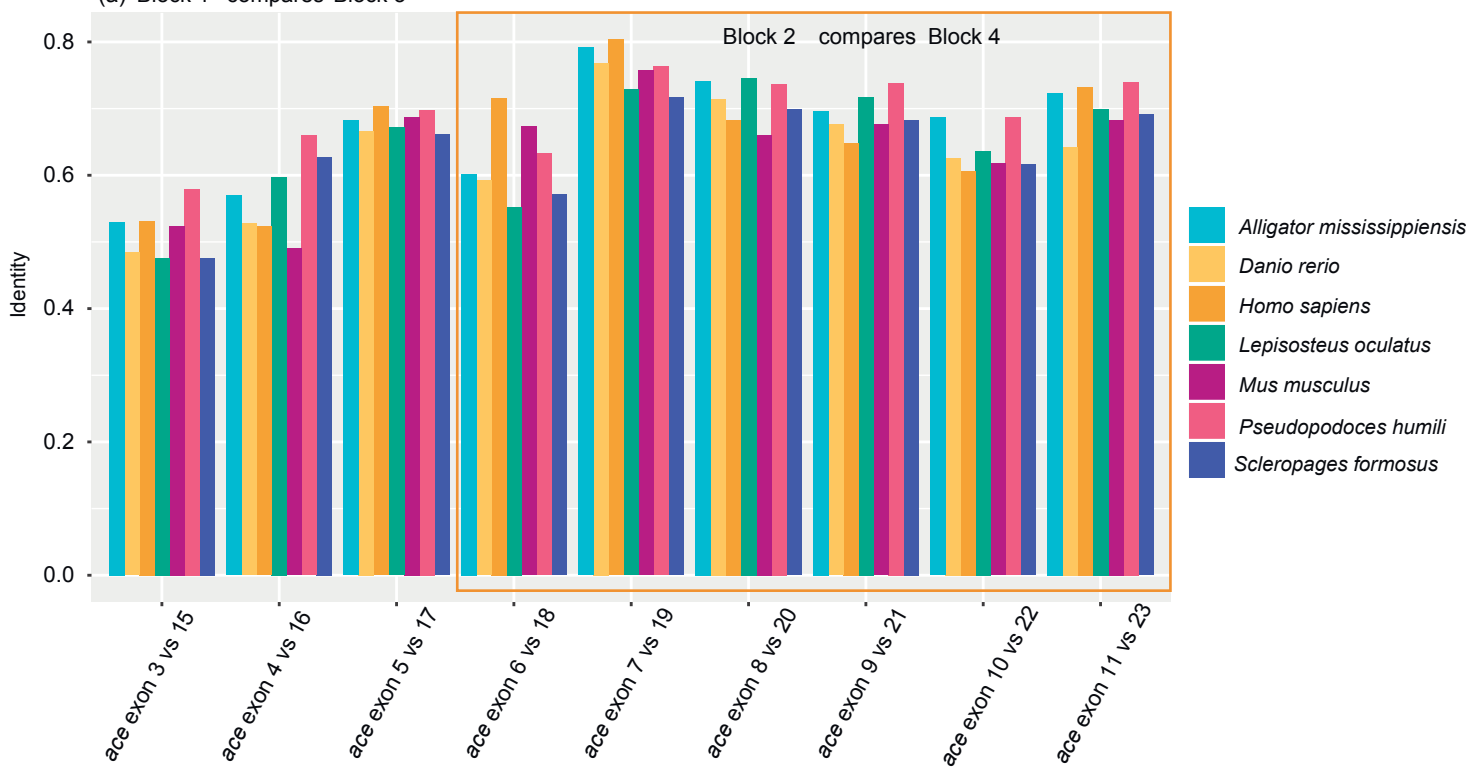

(b) Block 2 compares Block 5

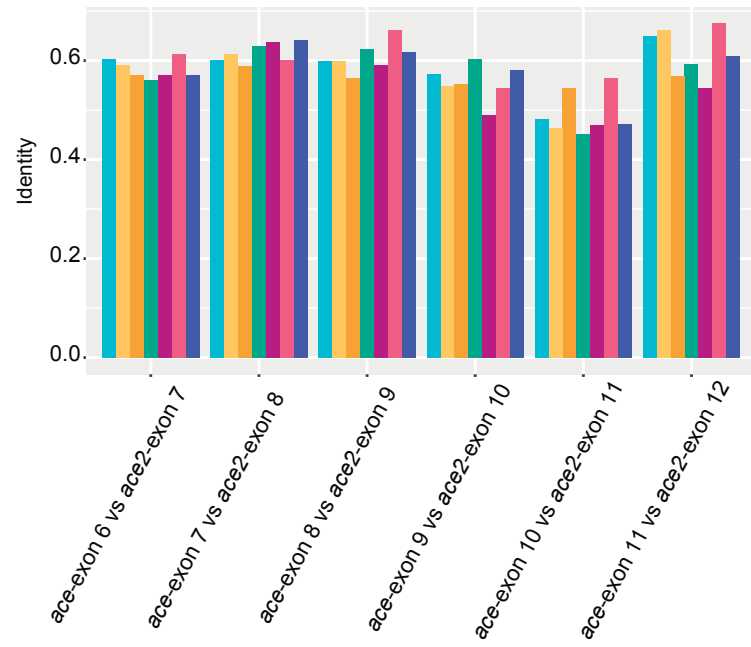

(b) Block 4 compares Block 5

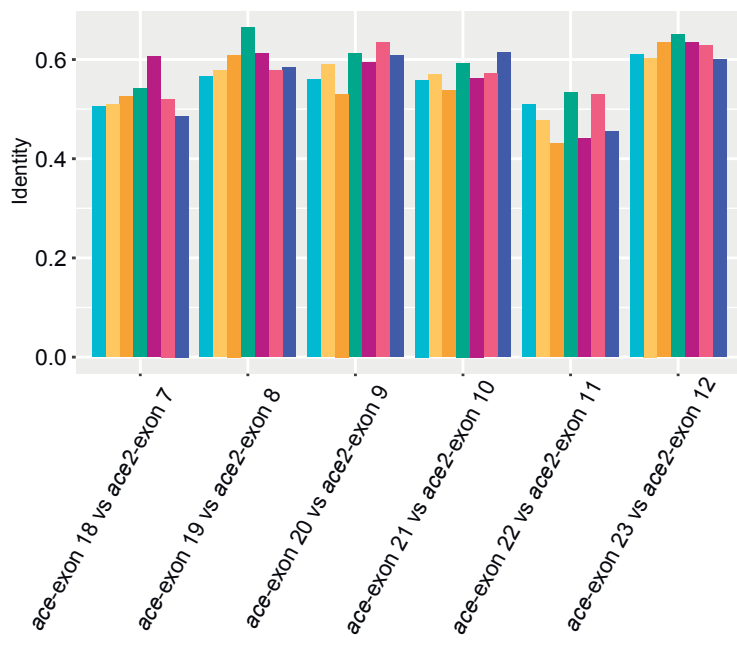

Supplement: s1 [file s1]

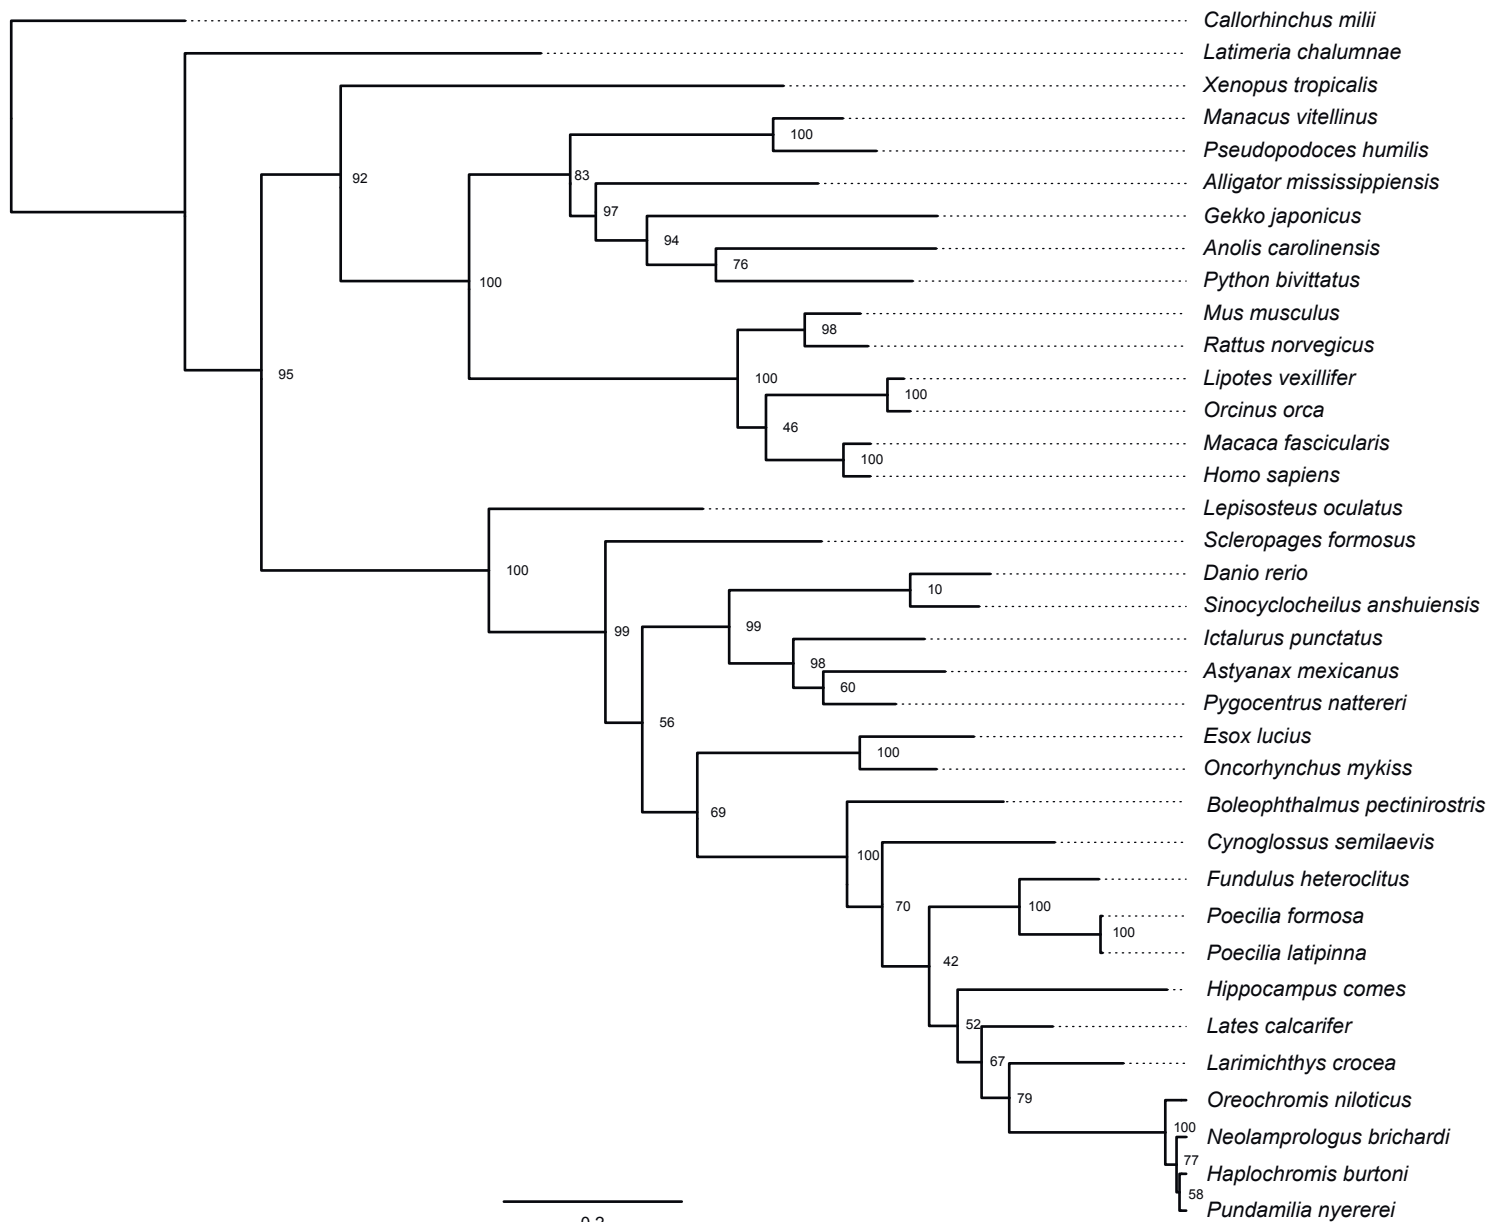

Supplement: s1 [file s1]

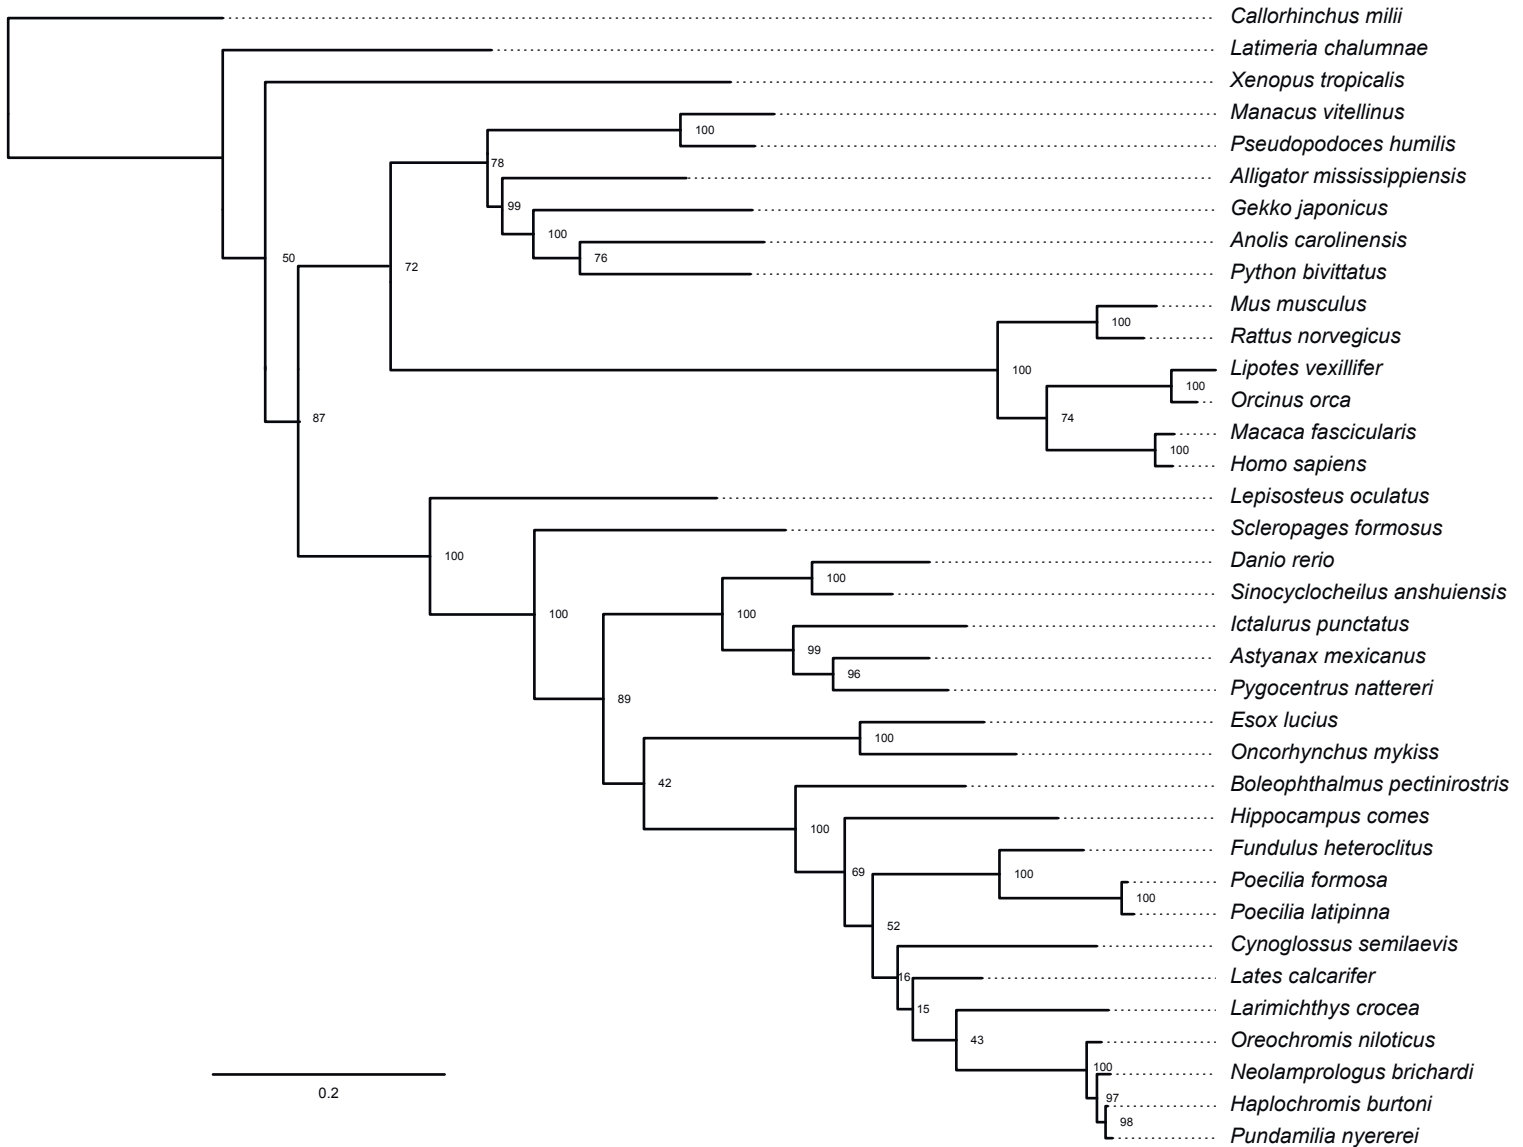

Supplement: s1 [file s1]
